# Supplementary material for: Technical note: A time-integrated sediment trap to sample diatoms for hydrological tracing
Source: Copernicus journal article supplement (doi:10.5194/hess-2020-166), 2020-04-27
Supplement: Supplementary file 1 [file Dataset_Drift diatom sampling.xlsx]

## Sheet: Diatom data 1%
					Diatom taxa codes (retrieved from Omnidia)
Code	Date	Event	Sample	Sampler	ADCT	ADKR	ADMI	ADRI	APED	CCOC	CEUG	COPL	CTWE	CMEN	ESLE	EBOT	EIMP	EMIN	FGRA	FPEC	FRUM	FTEN	FVAU	FFVI	GMIC	GMIN	GPAR	HLMO	HAMP	HCAP	MPET	MVAR	MCIR	MCON	NCRY	NEXI	NGER	NGRE	NHOF	NLAN	NRHY	NTEN	NTRV	NVEN	NACI	NACD	NAMP	NDIS	NHEU
3279	2018-10-30 12:30:00	1	1	Automatic	0	0	1.74129	0.746269	0.995025	0	0.746269	0	0	1.24378	1.24378	0	0	0	0.995025	0	0	0	0.497512	0	0	0.746269	1.24378	0.746269	0	0.746269	0	2.98507	0.248756	0	6.46766	1.24378	15.1741	18.6567	0	0	0.497512	0	1.24378	0	2.48756	0	0	5.22388	0.248756
3208	2018-10-30 19:55:00	1	2	Automatic	0	0	1.74129	1.24378	0	0	3.48259	0	1.24378	1.74129	0	0	0	0	0.746269	0	0	0	0.497512	0.248756	0	0	0.248756	0.248756	0.248756	0.746269	0.746269	3.73134	0	0.248756	7.71144	0	19.1542	12.1891	0	0.995025	0.248756	0.248756	0.497512	0	2.98507	0	0	0.746269	0.248756
3209	2018-10-30 22:55:00	1	3	Automatic	0	0	0.724638	2.41546	1.93237	0	0.966184	0	1.44928	2.657	0	0	0	0	2.89855	0.966184	0.483092	0.241546	0.241546	0.241546	0	0.483092	0.724638	0	0	1.20773	0	1.20773	0	0	3.62319	0	17.8744	16.1836	0	0.241546	0.724638	0.241546	0.241546	0.966184	2.41546	0	0.966184	3.62319	1.20773
3210	2018-10-31 01:55:00	1	4	Automatic	0	0	1.23457	1.48148	0.246914	0	2.22222	0.740741	1.7284	2.22222	0	0	0	0	0.246914	0.987654	0.493827	0.493827	0	0.246914	0	0	1.48148	0.493827	0	2.71605	0	2.22222	0	0.246914	6.17284	0	16.5432	17.7778	0	0.987654	0.987654	0.493827	1.7284	0	0.987654	0	0.740741	2.46914	0
3211	2018-10-31 04:55:00	1	5	Automatic	0.244499	0	0.977995	4.40098	1.22249	0.244499	2.44499	0	1.46699	1.22249	0.244499	0	0	0.244499	0.977995	0	2.44499	0	0	0.488998	0	0	0.977995	0.244499	0	1.71149	0	3.91198	0.244499	1.22249	6.35697	0.244499	10.2689	17.8484	0	1.22249	0.977995	0.244499	0.488998	0	0.733496	0.244499	0	1.71149	0.488998
3212	2018-10-31 07:55:00	1	6	Automatic	0	0	0.492611	0.492611	0.985222	0	0.985222	0	0	2.46305	0.985222	0	0	0	0.985222	0	0	0.492611	0.492611	0	0	0	0.985222	0	0.492611	0.985222	0.492611	0.492611	0	0	5.41872	0	17.2414	12.3153	0	0.985222	0.492611	0	0.985222	0	5.91133	0	0	1.97044	0
3213	2018-10-31 10:55:00	1	7	Automatic	0	0	0.478469	0.478469	1.43541	0	2.39234	0.478469	2.87081	9.09091	0.478469	0	0	0	0	0.478469	1.43541	0	0	0	0	0	0.478469	0	0	0.956938	0	0.956938	0	0	5.26316	0	6.69856	19.6172	0	0	0.478469	0.478469	0	0	4.30622	0	2.39234	9.09091	0
3214	2018-10-31 13:55:00	1	8	Automatic	0	0	1.49626	0.249377	1.74564	0	0.498753	0	0.249377	1.49626	0.997506	0	0	0	0.997506	0	0	0	0	0	0	0	0.249377	0.249377	0	2.24439	0	1.24688	0	0	1.99501	0.249377	17.9551	12.9676	0	0	0.498753	0	0	0	3.74065	0	0	7.98005	0
3215	2018-10-31 16:55:00	1	9	Automatic	0	0	1.49626	0.997506	0	0	0.249377	0	0	2.74314	0.74813	0	0	0	1.24688	0.249377	1.24688	0	0	0	0	0	1.74564	0.498753	0	0.997506	0.498753	0.249377	0	0	2.49377	0	16.2095	12.2195	0	0.249377	0.74813	0	0.249377	0	4.98753	0	0	8.72818	0
3216	2018-10-31 19:55:00	1	10	Automatic	0	0	1.9802	2.9703	2.9703	0	0.990099	0	0.990099	1.48515	0.49505	0	0	0	1.9802	0	0	0	0	0	0	0	0.990099	0	0	0.990099	0	1.48515	0	0	2.47525	0.990099	13.8614	7.92079	0	0	0.990099	0	0.49505	0	3.9604	0	0.990099	3.9604	0.990099
3217	2018-10-31 22:40:00	1	11	Automatic	0.248756	0	0.248756	0.248756	0.995025	0.995025	1.74129	1.24378	0.497512	2.73632	1.49254	0	0.248756	0.995025	0.746269	1.49254	1.24378	0.248756	0.746269	0	0	0.248756	3.48259	0.248756	0	2.23881	0	0.995025	0.497512	0.248756	4.47761	0	8.70647	15.4229	0	1.74129	0.746269	0.248756	0.248756	0	0	0	0.497512	3.23383	0.497512
3218	2018-11-02 10:40:00	1	12	Automatic	0	0	0.721154	0.961538	1.68269	0	0.721154	0.240385	0.721154	15.3846	0	0	0	0	0	0.721154	0	0.480769	0	0	0	0	0.721154	1.20192	0.240385	2.64423	0	1.44231	0	0.240385	6.97115	0.721154	9.13462	9.85577	0	0	0.480769	0	0	0.480769	4.32692	0	0	3.36538	1.20192
3219	2018-11-02 11:30:00	1	13	Automatic	0	0	0.242718	0.485437	0.485437	0	0	0	0.485437	1.94175	0	0	0	0	0.728155	0.728155	0	0	0	0	0	0	0.485437	0	0	1.45631	0	0.242718	0	0	2.42718	0.485437	25.4854	12.8641	0	0	1.21359	0	0	0	3.64078	0	0	5.58252	0.970874
3220	2018-11-02 14:00:00	1	14	Automatic	0	0	2.98507	0.497512	4.47761	0	0.497512	0	0.995025	3.48259	0	0	0	0	1.49254	0	0	0	0	0.995025	0	0	0.497512	0	0.497512	0	0	0	0	0.497512	3.9801	0	10.9453	8.45771	0	0.497512	0.497512	0	0	0.497512	0	0	0.497512	5.97015	1.99005
3221	2018-11-02 17:00:00	1	15	Automatic	0	0	9.67742	2.48139	1.24069	0.744417	2.72953	0.744417	0.496278	0.248139	0.992556	0.744417	0.744417	0.992556	0.992556	0.248139	0.496278	0	3.72208	1.24069	0	0	2.48139	1.48883	0.248139	0.248139	0.248139	1.48883	0.248139	2.23325	2.23325	0	1.48883	10.4218	0	0.496278	0.496278	1.48883	0	1.98511	0.248139	0.496278	0	2.23325	0
3222	2018-11-02 20:00:00	1	16	Automatic	0	0	3.72208	0.496278	5.45906	0	0.744417	0.248139	0	8.18859	0.248139	0	0	0	0.744417	0.496278	0.248139	0.248139	0	0	0	0.744417	0.496278	0.496278	0	1.73697	0	0.992556	0	0.248139	3.47395	1.24069	14.8883	12.6551	0	0.744417	0.248139	0	0.248139	0.496278	0	0	0.744417	0.744417	1.48883
3223	2018-11-02 23:00:00	1	17	Automatic	0	0	0.995025	1.74129	0.995025	0	2.98507	0.248756	0.995025	3.23383	1.99005	0	0	0	0.995025	0.248756	0	0	0.248756	0.497512	0	0.497512	4.22886	0	0	3.23383	0	1.49254	0.248756	0.248756	2.48756	1.24378	19.403	8.70647	0	1.74129	1.49254	0	0	0	0	0	2.98507	0.248756	0
3224	2018-11-03 02:00:00	1	18	Automatic	0.4	0	1.2	1.2	0.8	0	2.4	0	0.4	4.4	1.2	0	0	0	2	1.6	0	0.4	0	0	0	0.4	1.6	0	0	0.8	0	2	0.4	0	4	0.8	10.4	9.2	0	1.2	1.6	0	0.4	0.4	0.4	0	0.8	4.4	0
3225	2018-11-03 05:00:00	1	19	Automatic	0	0	2.41546	0.966184	0.966184	0	1.44928	0	0.241546	0.724638	0.724638	0	0	0.241546	0.966184	0.483092	0	0	0.966184	0	0	0.241546	0.724638	0.241546	0	2.89855	0	4.83092	0	0.724638	3.38164	0.241546	15.7005	13.5266	0	1.20773	0.966184	0.241546	0.724638	0.241546	1.20773	0	0.483092	2.657	0
3226	2018-11-03 08:00:00	1	20	Automatic	0	0	1.73697	0.248139	1.24069	0	1.24069	0	1.73697	4.96278	0.744417	0	0	0.744417	0.248139	0	0	0	1.24069	0	0	0	1.48883	0	0.248139	0.496278	0	1.73697	0	1.24069	6.94789	1.48883	11.9107	12.6551	0	0.744417	0.992556	0	1.24069	0	1.24069	0	0	5.95533	0.496278
3227	2018-11-03 11:00:00	1	21	Automatic	0.742574	0	0.49505	1.9802	0	0.247525	1.23762	0	0.49505	2.22772	0	0	0	0	0.49505	0.742574	0	0	0	0	0	0.247525	0.742574	0	0	1.48515	0	2.22772	0	0	4.45545	0.990099	19.802	11.1386	0	0.247525	0	0	0.742574	0	1.73267	0	0.247525	1.48515	0
3228	2018-11-03 14:00:00	1	22	Automatic	0	0	0.744417	0	0	0	0	0	0.248139	2.48139	0	0	0	0	0.248139	0	0	0	0	0	0	0.248139	0.744417	0.248139	0	0.992556	0	0	0	0	1.24069	0.496278	17.6179	13.3995	0.992556	0.248139	1.24069	0	0.992556	0	2.23325	0	0	3.97022	0.248139
3229	2018-11-03 17:00:00	1	23	Automatic	0.248756	0	0.995025	0.746269	0	0	0.248756	0	0	3.23383	0	0	0	0	0.497512	0	0	0	0	0	0	0.248756	0	0.497512	0	1.49254	0.248756	1.49254	0	0	1.24378	0.497512	13.4328	10.6965	0	0.995025	1.49254	0	0.497512	0.746269	4.22886	0	0.248756	1.49254	0
3230	2018-11-03 20:00:00	1	24	Automatic	0	0	0.997506	0.498753	0.74813	0	0.74813	0	0.498753	2.74314	0.498753	0	0	0	0.249377	0	0	0	1.24688	0	0	0	1.49626	0.249377	0	1.49626	0.249377	2.99252	0.498753	0.249377	3.2419	1.24688	17.207	11.7207	0	0.997506	1.49626	0	0.498753	0	1.24688	0	0.249377	3.49127	1.74564
3231	2018-11-03 23:00:00	1	25	Automatic	1.73267	0	1.73267	5.69307	0.49505	0	0.742574	0	0.49505	0.49505	0	0	0	0	0.990099	0.49505	0	0	0	0	0	0	0.49505	0.49505	0	1.23762	0	2.22772	0	0	3.21782	0.49505	10.1485	16.8317	0	1.23762	0.49505	0.49505	0.247525	0.49505	2.72277	0	0.49505	1.9802	0.49505
3232	2018-11-04 02:00:00	1	26	Automatic	0	0	3.49127	1.74564	3.49127	0	0.498753	0	0.498753	1.24688	0	0	0	0.249377	0.249377	0	0	0	0.498753	0.249377	0	0	0.997506	0	0	1.24688	0	3.2419	0	0.498753	4.73815	0.498753	8.97756	17.7057	0	0.74813	0.997506	0	0.249377	0	2.99252	0	0.249377	2.74314	0.498753
3233	2018-11-04 05:00:00	1	27	Automatic	0.248756	0	3.73134	2.73632	0.497512	0	0.248756	0	0.248756	0.995025	0	0	0	0	0.497512	0.995025	0	0	0.248756	0.248756	0	0.497512	1.49254	0	0.248756	1.24378	0	3.48259	0	0.248756	6.71642	0.746269	14.1791	12.4378	0	0.248756	0.746269	0.248756	0.746269	0	1.49254	0	0	3.9801	0
3234	2018-11-04 08:00:00	1	28	Automatic	0.420168	0	1.2605	0	0.420168	0	0.840336	0.420168	0	8.82353	0	0	0	0	0.420168	0.420168	0	0	0	0	0	0	1.68067	0	0	0.840336	0	0.840336	0	0.420168	3.78151	0	12.1849	10.084	0	0.420168	0	0	0.420168	0	1.2605	1.2605	0	1.2605	0.420168
3235	2018-11-04 11:00:00	1	29	Automatic	0.478469	0	2.15311	1.19617	0.239234	0	0.239234	0	0.956938	2.87081	0	0	0	0	0	0	0	0	0	0	0	0	0	0	0	1.19617	0	0.717703	0	0	3.34928	0	16.0287	14.3541	0	0.239234	0.239234	0	0	0	1.19617	0	0.239234	3.34928	0
3236	2018-11-04 14:00:00	1	30	Automatic	0	0	0.966184	2.17391	0.724638	0	0.483092	0	0.724638	1.93237	0.241546	0	0	0	0.483092	0	0	0	0.483092	0.241546	0	0	0.724638	0.483092	0.241546	1.20773	0	0	0	0	5.31401	0.724638	18.3575	19.0821	0	0.241546	0.483092	0	0	0.483092	1.69082	0	0	2.89855	0.241546
3237	2018-11-04 17:00:00	1	31	Automatic	0	0	0.884956	1.32743	0	0	0.884956	0	0.884956	2.21239	0.442478	0	0	0	0	0	0	0	0	0	0	1.76991	0	0	0	1.32743	0	0	0	0	5.30973	0	7.9646	11.9469	0	0	0	0	0.442478	0	3.09735	0	0	3.53982	0
3238	2018-11-04 20:00:00	1	32	Automatic	0.487805	0	2.43902	2.19512	0.731707	0	1.21951	0	0.97561	3.17073	0.487805	0	0	0	0.731707	0	0	0	0.97561	0	0	0.243902	0.97561	0.487805	0	0.97561	0	3.90244	0	0.487805	4.63415	0.97561	6.82927	16.8293	0	1.95122	0.731707	0	0.243902	0	1.21951	0	0.731707	0.243902	0
3239	2018-11-04 23:00:00	1	33	Automatic	0.242131	0	1.69492	2.66344	0.968523	0.242131	0.242131	0	1.45278	1.45278	0.242131	0	0	0.242131	0.242131	0	0	0	0.484262	0.242131	0	0.242131	0.968523	0	0.484262	2.66344	0	1.45278	0.242131	0	2.90557	0.726392	21.7918	12.8329	0	0.484262	0.726392	0.726392	0	0.242131	0.484262	0.484262	0.726392	0.726392	0.242131
3240	2018-11-05 02:00:00	1	34	Automatic	0	0	2.98507	0.995025	0	0	0.746269	0	0.497512	1.74129	0.497512	0	0	0	1.24378	0	0	0	0.248756	0	0	0.746269	0.248756	0.248756	0	1.74129	0	2.23881	0	0	5.22388	0.248756	19.9005	14.1791	0	0.746269	0.248756	0	0	0.497512	1.24378	0	1.24378	3.23383	0
3241	2018-11-05 05:00:00	1	35	Automatic	0.995025	0	1.24378	1.99005	0.497512	0	1.99005	0	0.497512	1.74129	0.248756	0	0	0.248756	1.49254	0.497512	0.248756	0.995025	0.248756	0	0	0.248756	0.746269	0.248756	0	0.746269	0	4.97512	0	0.248756	5.97015	0	13.4328	16.6667	0	0.995025	0.248756	0.995025	0.248756	0.746269	3.9801	0.497512	1.49254	1.99005	0.248756
3242	2018-11-05 08:00:00	1	36	Automatic	0	0	0.990099	2.47525	0	0	1.23762	0	0.990099	2.72277	0.247525	0	0	0.742574	1.73267	0	0	0	0	0.742574	0	0.990099	0.990099	0.742574	0	1.23762	0	0.247525	0.247525	2.22772	4.20792	0	21.0396	14.604	0	1.73267	0.247525	0	0	0	0.49505	0	0.247525	1.73267	0.742574
3243	2018-11-05 11:00:00	1	37	Automatic	0	0	0.238663	0.71599	0.477327	0	0.71599	0	0.954654	3.34129	0	0	0	0.238663	1.67064	0.238663	0	0.71599	0	0	0	0.238663	0.477327	0	0	0.477327	0	0.477327	0	0.71599	2.86396	0.477327	17.1838	14.7971	0	0.477327	0.238663	0.238663	0	0	7.39857	0	0	3.57995	0
3244	2018-11-05 12:30:00	1	38	Automatic	0	0	0.959233	1.67866	0	0	0	0	0.719424	2.8777	0.239808	0	0	0.239808	0	0	0	0	0.479616	0.239808	0	0.239808	0.479616	0	0	0.959233	0	0	0	0.239808	4.79616	0.479616	14.1487	8.15348	0	1.67866	0	0	0	0	3.83693	0	0	6.23501	0.959233
3245	NA	1	A	Phillips	0	0	2.58824	1.88235	1.17647	0	1.88235	0	1.88235	14.5882	0.235294	0	0	0.941176	0	0	0	0	1.88235	0	0	0	1.17647	0	0	1.41176	0	2.58824	0	0.705882	5.41176	1.41176	2.58824	14.8235	0	0.705882	2.11765	0	0.470588	0	0	0	0.470588	7.29412	0.470588
3246	NA	1	B	Phillips	0	0	4.5	1	0.75	0.25	1.25	0	1.25	7.25	0	0	0	0	0	0	0	0	1.25	0	0	0	3.25	0	0.25	1	0	1.5	0	0.75	0.5	1.75	20.25	12.5	1	2	1	0	0	0	0.5	0	0.25	4.25	0
3259	2018-11-09 17:30:00	2	1	Automatic	0	0	0.997506	1.99501	1.74564	0	1.99501	0	0.74813	4.2394	0.74813	0	0	0.249377	0.74813	0.249377	0	0	0	0	0	0.249377	0.249377	0.498753	0	0.74813	0	1.74564	0	0.249377	3.74065	0	13.4663	12.2195	0	0.249377	0.997506	0	0	0.249377	3.2419	0	0	4.98753	2.24439
3247	2018-11-10 13:40:00	2	2	Automatic	0	0	1.24688	0.74813	0.997506	0	0.249377	0	1.49626	8.4788	0.74813	0	0	0.498753	0	0	0	0	0.997506	0	0	0	0.498753	0.498753	0	0.249377	0.498753	0.74813	0	0.249377	1.99501	2.24439	17.207	14.9626	0	1.24688	0.498753	0.249377	0	0.249377	1.24688	0	0.498753	0.997506	0.249377
3248	2018-11-10 16:40:00	2	3	Automatic	0.719424	0	0.479616	0.719424	0.719424	0	0.239808	0	0.719424	3.35731	0.239808	0	0	0.239808	1.67866	0.479616	0.719424	0.239808	0	0	0	0.239808	0.239808	1.43885	0.479616	0.719424	1.19904	0.479616	0	0	2.63789	0	9.59233	12.47	0	0.959233	0.479616	0.959233	0	0.239808	3.11751	0	0.239808	4.55635	0.479616
3249	2018-11-10 19:40:00	2	4	Automatic	0.985222	0	3.20197	0.985222	2.21675	0	1.47783	0	0.985222	2.21675	0	0	0	0.246305	0.985222	0	0	0	0.985222	0	0	1.47783	0.492611	2.21675	0	1.72414	0	3.20197	0	0.492611	4.18719	0.738916	13.0542	11.8227	0	0	0.246305	0	0	0.492611	0.246305	0	0.985222	5.17241	0.985222
3250	2018-11-10 22:40:00	2	5	Automatic	0	0	6.12745	4.90196	2.69608	0	1.47059	0	0	0.980392	0.490196	0	0	0.245098	3.18627	0.980392	0	0	0	0	0	0.245098	1.22549	0.490196	0	1.47059	0	0.490196	0	0	9.06863	0	10.7843	20.3431	0	0.735294	0.490196	0.245098	0.490196	0	1.47059	0	0	2.45098	0
3251	2018-11-11 01:40:00	2	6	Automatic	0	0	2.47525	3.9604	0.247525	0	0.742574	0	0.990099	1.23762	0.49505	0	0	0.990099	2.22772	0.247525	2.22772	0	1.23762	0	0	0	1.73267	0	0	0.742574	0	0.742574	0	1.48515	4.70297	0	4.9505	19.3069	0	0.990099	0	0.742574	0.247525	0.742574	2.22772	0	0.247525	3.9604	1.23762
3252	2018-11-11 04:40:00	2	7	Automatic	0.973236	0	2.43309	2.18978	0.243309	0	2.18978	0	0.729927	1.45985	0.243309	0	0	0.729927	5.10949	0.973236	1.70316	0.243309	0	0.243309	0	0.486618	0.729927	0.243309	0.243309	0.973236	0.243309	2.18978	0	0.973236	5.59611	0	5.59611	17.5182	0	0.729927	0.243309	0.973236	0	0	2.18978	0	0.243309	4.86618	0
3253	2018-11-11 07:40:00	2	8	Automatic	0.950119	0	0.712589	0.950119	0.950119	0	2.3753	0	0.950119	4.038	0.23753	0	0	0	2.13777	0	0.23753	0	0	0.23753	0	0.475059	1.90024	0.475059	0	0.23753	0	3.56295	0	0.23753	3.56295	0.23753	8.31354	18.2898	0	0.950119	0	0	0.23753	0.475059	4.27553	0	0	5.93824	0.712589
3254	2018-11-11 10:40:00	2	9	Automatic	0	0	1.22549	1.96078	0	0	0.735294	0	0.980392	1.71569	0	0	0	0	2.69608	0	1.22549	0.490196	0	0	0	0	0.980392	0	0	0.735294	0.735294	0.490196	0	0.245098	5.14706	0	8.82353	18.8725	0	1.22549	0	0	0.490196	0.490196	7.10784	0	0	5.88235	0
3255	2018-11-11 13:40:00	2	10	Automatic	0	0	1.98511	2.97767	0	0	0	0	0.992556	2.72953	0.248139	0	0	0.496278	2.48139	0	0	1.73697	0.248139	0	0	0.248139	0.744417	0.744417	0	1.24069	0	0	0	0	5.7072	0.496278	6.45161	20.8437	0	0.496278	0.248139	0	0.248139	0.744417	4.4665	0	0	7.44417	0.992556
3256	2018-11-11 16:40:00	2	11	Automatic	0.238663	0	1.43198	1.43198	0	0	0.71599	0	0.477327	1.90931	0	0	0	0	3.57995	0	2.14797	2.86396	0	0	0	0	1.19332	0.238663	0.238663	0.477327	0.238663	0.238663	0	0.477327	5.01193	0	6.44391	15.2745	0	1.43198	0.71599	0.238663	0	0.71599	1.43198	0	0.71599	17.4224	0
3257	2018-11-11 19:40:00	2	12	Automatic	0	0	0.691244	0.921659	0.230415	0.230415	1.15207	0	0.691244	2.99539	1.15207	0	0.460829	0	2.76498	0.921659	0	0	0.230415	0.921659	0	0	1.38249	0.460829	0.230415	1.38249	0	4.83871	0	1.38249	4.60829	0.230415	7.60369	17.9724	0	1.38249	0.230415	1.38249	0	0.460829	0.691244	0	0	4.14747	2.07373
3258	2018-11-11 22:40:00	2	13	Automatic	0.733496	0	3.42298	2.93399	1.71149	0	1.71149	0	1.22249	0.977995	0	0	0	0.244499	3.42298	0.977995	1.95599	0	0	0.244499	0	0	0.244499	0.977995	0.244499	2.20049	0	4.64548	0	0	8.06846	0	10.7579	16.6259	0	1.22249	1.46699	0.244499	0.244499	0	0	0	0.244499	2.93399	0
3260	2018-11-12 04:40:00	2	14	Automatic	2.24439	0	3.2419	3.2419	0.498753	0	1.24688	0	0.74813	0.997506	0	0	0	0	2.49377	0.997506	0.498753	0.997506	0	0	0	0.74813	0.74813	0.249377	0	0.498753	0.498753	1.24688	0	0.498753	9.72569	0.498753	4.2394	22.4439	0	0.997506	0.249377	0.498753	0	0	0.74813	0	0	4.48878	0
3261	2018-11-12 10:40:00	2	15	Automatic	0	0	1.74564	0	0.498753	0	0.249377	0	1.24688	1.49626	0	0	0.249377	0	3.2419	0.498753	0	0.997506	0	0	0	0.249377	0.74813	0	0	0.74813	0.498753	0.74813	0	0.74813	4.98753	0.249377	8.22943	19.9501	0	0.249377	0.498753	0	0	0.249377	5.98504	0	0	7.98005	2.49377
3262	2018-11-12 16:40:00	2	16	Automatic	0.742574	0	1.48515	3.46535	0.49505	0	0.49505	0	0.49505	0.742574	0.247525	0	0	0	3.46535	0	1.73267	3.21782	0	0.247525	0	0.742574	0.247525	0.742574	0	0.990099	0.247525	1.73267	0	0.247525	3.9604	0.742574	10.1485	20.0495	0	0.990099	0.742574	0	0.742574	0.49505	2.22772	0	0	8.16832	0
3263	2018-11-12 22:40:00	2	17	Automatic	0	0	3.74065	2.99252	0.997506	0.249377	1.99501	0	0.997506	0.498753	0.249377	0	0.249377	0	2.49377	0.74813	0	0	0.249377	0.249377	0	0.249377	0.498753	0.74813	0	0.997506	0.249377	1.74564	0	0.74813	10.2244	0	5.98504	20.6983	0	0.997506	0.997506	0.249377	0	0.997506	0.498753	0	0.249377	3.74065	0.498753
3280	2018-11-13 04:40:00	2	18	Automatic	1.4742	0	1.2285	2.457	1.7199	0.2457	2.457	0	1.4742	2.9484	0.982801	0	0.2457	0	3.4398	0.982801	1.2285	0.2457	0.737101	0.4914	0	0	1.7199	0	0	0.982801	0	1.7199	0.2457	0.2457	5.15971	0	9.33661	17.6904	0	0.982801	0.4914	0.737101	0	0.2457	0.4914	0	0.4914	3.4398	0.2457
3264	2018-11-13 10:40:00	2	19	Automatic	0.496278	0	1.73697	0.744417	0.496278	0	0.248139	0	0.248139	1.98511	0.248139	0	0.248139	0	1.48883	0.744417	0.992556	0.744417	0	0	0	0	0.744417	0	0	0.496278	0	0.496278	0	0.496278	5.95533	0.248139	14.1439	23.3251	0	0.744417	0.496278	0	0	0	5.21092	0	0.248139	5.21092	0
3265	2018-11-13 16:00:00	2	20	Automatic	0	0	1.97531	1.48148	0.987654	0.493827	2.96296	0	0.740741	1.23457	0.246914	0	0	0	2.71605	0.246914	0	0.987654	0	0.246914	0	0	0.987654	0	0	1.23457	0.246914	7.40741	0	0.246914	5.67901	0	6.41975	16.2963	0	1.23457	0.493827	0.740741	1.48148	0.246914	3.45679	0	1.7284	5.18519	1.7284
3266	2018-11-14	2	21	Automatic	0.742574	0	1.48515	4.45545	1.23762	0	0.990099	0	0.247525	0.742574	0.247525	0	0	0	2.22772	0.742574	1.23762	1.23762	0	0	0	0.742574	2.22772	0.247525	0	1.23762	0.990099	1.9802	0.247525	0	4.70297	0.247525	10.1485	21.0396	0	0.990099	0.742574	0.49505	0.247525	0.49505	0.49505	0	1.23762	5.19802	0
3267	2018-11-14 08:00:00	2	22	Automatic	0	0	2.22772	0.49505	0.49505	0.49505	0.990099	0	1.23762	3.21782	0	0	0	0.247525	3.71287	0.742574	0	0.742574	0	0	0	0.247525	1.48515	0	0.247525	0.742574	0.247525	2.72277	0	0	5.69307	1.23762	18.3168	21.5347	0	0.990099	0.742574	0.247525	0.247525	0.49505	2.22772	0	0.247525	2.9703	0
3268	2018-11-14 16:00:00	2	23	Automatic	1.23457	0	2.22222	0.987654	1.23457	0	0.987654	0	0.740741	0.740741	0	0	0	0	3.7037	0.987654	1.7284	0.246914	0	0	0	0	1.48148	0.246914	0	0.987654	0.246914	0.246914	0	0.246914	4.69136	0.740741	9.1358	24.4444	0	0.740741	1.48148	0	0.246914	0.987654	5.18519	0	0.493827	5.18519	0
3269	2018-11-15	2	24	Automatic	0	0	3.20197	3.20197	1.97044	0	1.23153	0	0.738916	0.492611	0.492611	0	0	0	2.70936	0	0	0.246305	0.738916	0.492611	0	0.738916	1.72414	0.246305	0.492611	0.985222	0	0.492611	0	0	7.14286	0	13.3005	17.734	0	0.492611	0.492611	0.246305	1.23153	0.985222	0.738916	0	0.492611	7.14286	0
3270	2018-11-15 08:00:00	2	25	Automatic	0	0	0.490196	0.980392	0.735294	0	0	0	0.245098	2.69608	0	0	0	0	4.16667	0.490196	0	1.47059	0	0.245098	0	0	1.47059	0	0	1.22549	0	0.490196	0	0	7.10784	2.69608	15.1961	20.098	0	0.490196	0.490196	0.490196	0.735294	0.245098	1.47059	0	0.245098	6.12745	0
3271	2018-11-15 16:00:00	2	26	Automatic	0	0	1.49626	1.49626	0.498753	0	0.997506	0	0.997506	1.74564	0	0	0	0.249377	1.74564	0	2.49377	2.24439	0.249377	0	0	0	0.997506	0.249377	0	0.74813	0.498753	0.498753	0	0.249377	4.73815	0.498753	13.4663	22.9426	0	0.249377	0.997506	0	0	0.997506	2.49377	0	0.249377	6.98254	0
3272	2018-11-16	2	27	Automatic	0.493827	0	0.740741	0.493827	0.246914	0.246914	0.987654	0	1.23457	1.23457	0	0	0	0	4.69136	0.740741	1.48148	1.23457	0	0	0.246914	0.493827	0.493827	0	0	0.987654	0	0.740741	0	0.246914	6.91358	0	17.284	21.9753	0	0.740741	1.23457	0	0	0.987654	1.97531	0	0	3.20988	0
3273	2018-11-16 08:00:00	2	28	Automatic	0	0	3	2	0.25	0	1	0	0.75	3.75	0.25	0	0	0	3	0.25	0.25	2.75	0	0	0	0	1.25	0.25	0.75	1.25	0	1	0	0	2.25	1.5	11.75	22.5	0	0	1.25	0	0.75	0.75	2.25	0	0.75	5	0
3274	2018-11-16 16:00:00	2	29	Automatic	0.992556	0	1.48883	1.98511	0.992556	0.992556	1.73697	0	0	1.73697	0.248139	0	0.248139	0.744417	3.47395	2.97767	3.22581	0	0.744417	0.744417	0	1.24069	2.72953	0.248139	0	0.744417	0	0.744417	0.248139	0.496278	2.48139	0.744417	7.44417	17.866	0	0.496278	0.248139	0	0.248139	0.992556	1.24069	0	0.248139	1.98511	0
3275	2018-11-17	2	30	Automatic	1.2285	0	0.4914	2.7027	0.737101	0	0.737101	0	0.737101	2.2113	0	0	0	0	4.6683	0.2457	0	0.737101	0.4914	0.2457	0	0.2457	0.982801	0	0	1.2285	0	2.2113	0.2457	0	6.14251	0	9.82801	17.199	0	0.737101	1.7199	0.2457	0.737101	2.9484	2.9484	0.4914	0	2.2113	0
3276	2018-11-17 08:00:00	2	31	Automatic	0.497512	0	1.99005	1.24378	0.497512	0.248756	3.23383	0.497512	0.497512	1.49254	0.248756	0	0	0.248756	2.48756	0.995025	0.497512	0.248756	0.497512	0.248756	0	0	3.23383	0	0.497512	1.74129	0	1.74129	0.497512	0.995025	4.22886	0.995025	16.9154	14.6766	0	0.995025	0.746269	0	0.248756	0.497512	0.248756	0	0.497512	2.23881	0.497512
3277	NA	2	A	Phillips	1.45985	0	1.70316	3.89294	1.21655	0.243309	2.91971	0	1.70316	4.13625	0.243309	0	0	0.729927	1.70316	0.973236	0	0	0	0	0	0.973236	2.18978	0.243309	0.243309	0	0	1.70316	0	0.729927	4.37956	0.243309	10.7056	16.0584	0	0.729927	0.243309	0	0.243309	0	0	0	0	4.86618	0
3278	NA	2	B	Phillips	0.4914	0.2457	1.7199	3.6855	0	0	1.9656	0	0.982801	2.9484	0.2457	0	0	0.737101	4.1769	0.982801	0.2457	0.4914	0	1.2285	0	0.2457	0.737101	0	1.2285	0.2457	1.2285	5.65111	0.2457	0.737101	3.1941	0	8.10811	15.9705	0	0.2457	0.737101	0	1.2285	0.2457	0.982801	0	0	3.4398	0
3325	2018-12-07 12:00:00	3	1	Automatic	0	1.45278	6.53753	2.17918	0.242131	0	2.90557	0.242131	1.21065	0.242131	0.242131	0.726392	0.726392	0.726392	2.66344	1.69492	0.968523	0	0.484262	0.726392	0	0.968523	0.484262	0	0.726392	0	0.726392	4.60048	1.21065	0.726392	2.66344	0	0.484262	18.8862	0.484262	1.69492	0	0	0	0	0	0.484262	0.242131	5.56901	0
3297	2018-12-07 16:00:00	3	2	Automatic	0	0	8.80196	4.64548	1.71149	0.244499	3.17848	0.488998	0.488998	1.22249	1.46699	0.244499	0.244499	0	1.71149	0	2.68949	0	4.40098	1.22249	1.46699	0	1.95599	0	0	0.244499	0	0	0.488998	0.488998	4.15648	0.977995	2.93399	16.6259	0	0.733496	0.733496	0.244499	0	0	0.244499	0.244499	0.244499	1.95599	0
3298	2018-12-07 18:00:00	3	3	Automatic	0	0.248756	5.47264	3.9801	0.995025	0	2.98507	0.497512	0.497512	0.995025	0.497512	0.497512	0	0.995025	1.99005	0.497512	1.24378	0	2.48756	0.995025	0.248756	2.48756	2.23881	0	0.746269	1.49254	0	1.74129	0.746269	1.49254	1.49254	0	3.9801	13.9303	0.746269	1.24378	0.746269	0.248756	0	0	0	0.497512	0.248756	2.23881	0
3299	2018-12-07 20:00:00	3	4	Automatic	0.990099	0	6.93069	3.21782	0	0.742574	2.9703	0.247525	1.48515	0.49505	0.990099	0.247525	0	0.247525	1.48515	0	2.22772	0	2.72277	0.742574	0.990099	0.247525	0.742574	0.247525	0.247525	0	0	0.742574	0	1.23762	3.71287	0.247525	3.46535	21.2871	0	1.23762	0.742574	0.247525	0	0.49505	0	0.742574	0	1.73267	0
3300	2018-12-08	3	5	Automatic	0.248139	0.992556	5.45906	2.23325	1.24069	0	3.72208	0.248139	0.992556	0	0.744417	0	0	0.496278	1.73697	0.992556	1.73697	0	2.48139	0.992556	0	0.248139	1.73697	0	0	0.248139	0	2.23325	0.248139	0.248139	3.97022	0	3.22581	19.1067	1.98511	0.992556	0	1.48883	0	0	0	0.496278	0.248139	3.97022	0
3301	2018-12-08 04:00:00	3	6	Automatic	0	0	6.87961	2.9484	0	0.737101	3.1941	0.2457	0.982801	0.982801	0.737101	0.2457	0.4914	0	1.4742	0	0.982801	0	2.9484	0	0.4914	0.2457	1.2285	1.7199	0.2457	0.4914	0	0.982801	0.4914	0.4914	5.89681	0.982801	3.1941	14.4963	0	1.2285	0	1.7199	0	0.737101	0.4914	0.4914	0.4914	4.914	0
3302	2018-12-08 08:00:00	3	7	Automatic	0	0	4.69136	1.97531	0.740741	0.246914	3.45679	1.23457	1.48148	0.493827	0.493827	0.246914	0	0.740741	2.71605	0.493827	1.7284	0	2.96296	0.987654	0.246914	0.740741	0.987654	0	0	0.246914	1.97531	5.18519	0.493827	0.740741	1.48148	0	0.987654	16.0494	1.48148	1.97531	0.987654	0	0	0	0.740741	0	0	0.987654	0
3303	2018-12-08 12:00:00	3	8	Automatic	0	0	6.87961	5.15971	0	0.4914	2.457	0	0.737101	0	0.737101	0.4914	0.2457	0.4914	0.2457	0	1.2285	0	3.9312	0.982801	0	0	2.2113	0.4914	0	0.2457	0	1.9656	0.737101	1.2285	3.1941	0	0.982801	18.6732	0	2.457	0.2457	0.2457	0	0.2457	0.737101	0.2457	0.2457	2.9484	0
3304	2018-12-08 16:00:00	3	9	Automatic	0	0	5.26316	2.87081	1.19617	0.239234	4.78469	0.478469	1.91388	0.956938	0.478469	0	0.239234	0.478469	3.11005	0	0.717703	0	4.06699	0.717703	0.478469	0	1.19617	0.478469	0	0	0.239234	6.69856	0.239234	0.956938	1.91388	0	0.956938	16.5072	0.239234	2.39234	0.239234	0.239234	0	0	0.239234	0	0.239234	5.26316	0
3305	2018-12-08 20:00:00	3	10	Automatic	0	0	4.58937	2.657	0.724638	0.483092	3.86473	0.483092	0.724638	0.724638	1.69082	0.724638	0	0.724638	1.69082	0.724638	2.17391	0	2.41546	0.483092	0.483092	0	2.89855	0.241546	0	0	0	2.89855	0.241546	0.483092	4.83092	0.966184	1.69082	16.4251	0	1.93237	0	0.724638	0.241546	0.241546	0	0.724638	0	2.41546	0
3306	2018-12-09	3	11	Automatic	0.478469	0.478469	8.85167	3.34928	1.43541	0.956938	6.45933	0.478469	0.478469	0.239234	1.19617	0.239234	0	0.239234	0	0.717703	1.91388	0	3.34928	1.19617	0.717703	0	1.67464	0.478469	0	0.239234	0	1.91388	0	0.239234	2.63158	0	1.43541	16.7464	0.239234	1.19617	0.717703	0	0	0	0.239234	0.956938	0.956938	1.67464	0
3307	2018-12-09 04:00:00	3	12	Automatic	0.246914	0	8.64198	5.92593	1.23457	0.740741	2.22222	0.740741	0	0.493827	0.740741	0.246914	0.246914	0	2.71605	1.7284	0.740741	0	3.20988	0.493827	0	1.48148	2.22222	0	0.246914	0.246914	0	0.246914	0.493827	0.246914	2.46914	0	0	13.0864	0.740741	0.740741	0.493827	0	0	0.246914	0	0	0.246914	2.22222	0
3308	2018-12-09 08:00:00	3	13	Automatic	0.4914	1.4742	11.5479	3.1941	0.2457	0.4914	4.4226	0.4914	0.4914	0	0.4914	0	0	1.2285	0.2457	1.7199	1.7199	0	3.6855	0.982801	0.982801	1.2285	2.457	0.2457	0	0	0	1.4742	0.4914	1.2285	1.9656	0	0.982801	13.2678	0.4914	1.7199	0	0	0	0	0	0.4914	0.4914	0	0
3309	2018-12-09 12:00:00	3	14	Automatic	1.48515	0	5.69307	2.47525	0	0.247525	2.9703	0.49505	0.742574	0	2.72277	1.48515	0.49505	1.23762	2.47525	0	1.73267	0	3.21782	1.73267	0.49505	0.49505	1.73267	0	0	0.990099	0	1.9802	0.49505	0.990099	1.9802	0	0	12.6238	0.247525	1.73267	0	0	0	0.247525	0	0.247525	0.247525	0.990099	0
3310	2018-12-09 17:00:00	3	15	Automatic	0.496278	0.496278	8.68486	2.97767	0.248139	0.248139	2.97767	0.744417	0	0.248139	0	0.496278	0	0.992556	1.73697	0	0.496278	0	2.97767	1.48883	0.992556	1.24069	3.47395	0	0.248139	0.496278	0	1.73697	1.48883	0.744417	3.22581	0	0.744417	15.8809	0	0	0.248139	0.744417	0	0.496278	0.248139	1.24069	0.496278	0.744417	0
3311	2018-12-09 23:00:00	3	16	Automatic	0.746269	0	5.72139	0.497512	0.248756	1.24378	3.48259	1.49254	0.248756	0.248756	1.74129	1.24378	1.49254	0.497512	1.49254	0.248756	0.746269	0	5.97015	1.99005	1.49254	1.49254	2.73632	0.746269	1.24378	0.248756	0	0.995025	0.497512	1.24378	2.73632	0	2.23881	9.95025	0	1.74129	0.248756	0	0.248756	0	0	0.248756	0.497512	0.746269	0
3312	2018-12-10 05:00:00	3	17	Automatic	0.731707	0.243902	10.4878	1.46341	0.487805	1.46341	3.90244	0.243902	0	0.487805	1.21951	0	0	0.97561	1.21951	0	1.21951	0	3.17073	2.19512	0.243902	0	4.39024	0	0.243902	1.21951	0	0.243902	0.243902	1.95122	2.92683	0	1.70732	7.07317	0	0.731707	0.243902	0.487805	0	0	0.243902	0.731707	0.243902	0.731707	0
3313	2018-12-10 11:00:00	3	18	Automatic	0.498753	0	5.98504	0.249377	0	1.49626	4.73815	1.24688	0.498753	0	3.49127	0.249377	0.498753	0.498753	0.498753	2.24439	1.24688	0	2.49377	0.997506	0.997506	0.249377	6.48379	0.249377	0.498753	0.997506	0	0.997506	0.498753	0.498753	1.49626	0	1.74564	11.4713	0	1.24688	0.498753	0	0	0	0	0.74813	0.249377	0.997506	0
3314	2018-12-10 17:00:00	3	19	Automatic	0.746269	0.497512	10.199	2.48756	0.746269	0.497512	4.22886	0.248756	0	0	0.497512	0.497512	0	1.24378	0.995025	0.497512	1.74129	0	4.97512	0.248756	0.497512	1.49254	5.97015	0	0.248756	0	0	0.248756	0.746269	1.49254	2.23881	0	1.99005	12.1891	0.248756	0.248756	0	0	0	0	0	0.746269	0.248756	1.24378	0
3315	2018-12-10 23:00:00	3	20	Automatic	0.742574	0.49505	9.65347	1.48515	0.742574	0.49505	2.47525	1.23762	0	0	0.742574	0.247525	0.742574	0.990099	1.73267	0.742574	0.247525	0	3.71287	0.990099	1.73267	0.247525	3.21782	0.49505	0.49505	0.247525	0	0.49505	0.247525	1.9802	1.73267	0	0.742574	18.3168	0	0.49505	0	0	0	0	0	0.49505	0	0.990099	0
3316	2018-12-11 05:00:00	3	21	Automatic	1.49626	1.24688	10.7232	2.74314	0.498753	0.74813	1.74564	0.249377	0.249377	0.249377	0.498753	1.24688	0	0.997506	1.24688	1.24688	0	0	3.99002	0.74813	0	0.997506	1.74564	0	0	0	0.74813	0	1.24688	0.498753	2.49377	0	0.249377	13.4663	0.997506	0.74813	0.498753	0.74813	0	0	0	0.498753	0.249377	0.997506	0
3317	2018-12-11 11:00:00	3	22	Automatic	3.69458	1.23153	11.8227	1.23153	1.72414	0.246305	0.985222	0.738916	0	0.492611	0.738916	0	1.23153	1.23153	1.72414	1.47783	1.23153	0	1.72414	0.985222	0	1.23153	3.69458	0.246305	0	0.246305	0	0	0	0.246305	1.47783	0	0.246305	16.2562	0.492611	0.492611	0.246305	0	0	0	0	1.23153	0	0.492611	0
3318	2018-12-11 17:00:00	3	23	Automatic	0.728155	0.728155	7.76699	2.6699	0	0.485437	3.39806	0.970874	0.485437	0.242718	0.485437	0.242718	0	1.21359	1.21359	1.21359	0	0	3.39806	1.69903	0.485437	0.485437	3.39806	0	0.728155	0.970874	0	0.485437	0.970874	1.21359	0.970874	0	0.970874	16.9903	0.970874	0	0	0.485437	0.242718	0.485437	0	0.242718	0.242718	1.94175	0
3319	2018-12-11 23:00:00	3	24	Automatic	1.73267	1.9802	12.6238	4.9505	0.742574	0.247525	0.247525	0	0	0.49505	1.23762	1.48515	0	0.247525	1.73267	1.48515	0.247525	0	2.72277	0.247525	0.247525	0.742574	0.247525	0	0	0.247525	0.247525	0	0.49505	0.247525	3.46535	0	0.247525	14.1089	0	0	0.247525	0.247525	0	0	0.247525	1.23762	0.990099	0.742574	0
3320	2018-12-12 05:00:00	3	25	Automatic	1.71569	0.980392	14.2157	6.37255	0.735294	1.47059	1.22549	0	0	0	1.22549	0.490196	0	0	1.47059	0.980392	0.735294	0	2.94118	0.490196	0	0.735294	0.490196	0.490196	0	0	0	0	0	0.245098	1.22549	0	1.71569	16.1765	0	0	0	0.245098	0	0	0	1.47059	0.245098	0	0
3321	2018-12-12 11:00:00	3	26	Automatic	1.49254	0.746269	9.45274	3.9801	1.74129	0.248756	2.73632	0.746269	0	0.497512	0.497512	1.74129	0	1.24378	1.99005	1.74129	0	0	1.74129	1.49254	0.497512	0.995025	2.48756	0.497512	0	0	0.248756	0.497512	0.746269	0	2.98507	0	0.746269	14.6766	0.248756	0.497512	0.248756	0.497512	0.248756	0	0.746269	0.995025	0.248756	0.995025	0
3322	2018-12-13 10:30:00	3	27	Automatic	1.23457	1.23457	8.88889	3.95062	0	0.740741	4.19753	0.987654	0.740741	0.246914	0.493827	0.246914	1.7284	0.740741	2.22222	0.246914	1.48148	0	2.22222	2.96296	0.493827	0.493827	3.7037	0	0.246914	0	0	1.23457	0.493827	0.246914	2.46914	0	0.246914	10.8642	0	1.97531	0.493827	0.493827	0	0	0.246914	0.987654	0.246914	0.246914	0
3326	2018-12-17	3	28	Automatic	0.246305	0.738916	6.40394	2.21675	0.985222	0.985222	4.6798	0.246305	0.492611	0.246305	0.246305	0.492611	0.246305	1.72414	3.44828	1.47783	0.492611	0	2.95567	2.21675	0.246305	0.246305	1.97044	0	0.246305	0.246305	0	1.23153	0	1.72414	1.23153	0	0.492611	13.0542	0.738916	2.46305	0.246305	0	0	0.246305	0	1.72414	0	0.985222	0
3323	NA	3	A	Phillips	4.1769	0.982801	11.3022	6.38821	1.4742	0.2457	1.4742	0	0	0.2457	0.982801	0.4914	0	0.4914	1.2285	2.7027	0.737101	0	1.7199	0.737101	0	0.2457	2.2113	0.4914	0.2457	0	0.737101	0	0	0.2457	2.2113	0	0	8.35381	0	0	0	0.2457	0	0.4914	0	1.4742	0	0.2457	0
3324	NA	3	B	Phillips	4.64548	2.20049	21.0269	8.31296	0	0.244499	0.733496	0	0.244499	0	0	2.20049	0	0	0.488998	0.244499	0.733496	0	1.71149	0.488998	0	0	0.733496	0.488998	0	0	2.20049	0	0	0	1.22249	0	0	8.06846	0	0	0	0	0	0	0.244499	1.71149	0	0.488998	0
[truncated: 43 more columns]

## Sheet: Taxon list, Guilds, Biovolume
Taxa	Code	Guilds	Biovolume (µm³)
Achnanthidium catenatum (Billy et Marvan) Lange-Bertalot	ADCT	1	62
Achnanthidium eutrophilum (Lange-Bertalot) Lange-Bertalot	ADEU	2	72
Achnanthidium kranzii (Lange-Bertalot) Round et Bukhtiyarova	ADKR	2	76
Achnanthidium lineare W. smith	ACLI	2	46
Achnanthidium minutissimum (Kützing) Czarnecki	ADMI	2	76
Achnanthidium rivulare Potapova et Ponader	ADRI	2	64
Adlafia bryophila (J.B. Petersen) Lange-Bertalot	ABRY	3	109
Adlafia miniscula var. Muralis (Grunow) Lange-Bertalot	ADMM	3	76
Amphora indistincta Levkov	AMID	2	72
Amphora lange-bertalotii Levkov et Metzeltin var. lange-bertalotii	AMLB	2	5731
Amphora pediculus (Kützing) Grunow	APED	2	41
Aulacoseira sp.1	AULA	4	226
Caloneis aerophila Bock	CAER	3	626
Caloneis lancettula (Schulz-Danzig) Lange-Bertalot et Witkowskii	CLCT	3	626
Caloneis silicula (Ehrenberg) Cleve	CSIL	3	1994
Caloneis sp.1	CALO	3	523
Cavinula cocconeiformis (Gregory) D.G. Mann et Stickle	CCOC	3	561
Cavinula lapidosa (Krasske) Lange-Bertalot	CVLP	3	431
Cavinula variostrata (Krasske) Lange-Bertalot	CVVA	3	434
Chamaepinnularia muscicola (J.B. Petersen) Kulikovskiy, Lange-Bertalot et Witkowski	CHMC	3	37
Chamaepinnularia obsoleta (Hustedt) C.E. Wetzel et Ector	CHOB	3	19
Cocconeis euglypta Ehrenberg	CEUG	2	2533
Cocconeis lineata Ehrenberg	CLNT	2	2871
Cocconeis pediculus Ehrenberg	CPED	2	2281
Cocconeis placentula Ehrenberg var. Placentula	CPLA	2	2963
Cocconeis pseudolineata (Geitler) Lange-Bertalot	COPL	2	1223
Conticribra weisfloggi (Grunow) Stachura-Suchoples & Williams	CTWE	4	509
Craticula accomoda (Hustedt) D.G. Mann	CRAC	3	319
Craticula buderi (Hustedt) Lange-Bertalot	CRBU	3	163
Craticula cuspidata (Kützing) D.G. Mann	CRCU	3	15600
Craticula minusculoides (Hustedt) Lange-Bertalot	CMNO	3	162
Crenotia thermalis (Rabenhorst) A.Z. Wojtal	CRTH	2	163
Cyclotella meneghiniana Kützing	CMEN	4	1356
Cymatopleura solea (Brébisson) W. Smith var. solea	CYMA	3	60159
Cymbella sp.1	CYMB	0	11133
Cymbella tumida (Brébisson) Van Heurck	CTUM	1	6291
Cymbopleura naviculiformis (Auerswald) Krammer	CBNA	2	1419
Cymbopleura sp.1	CBPL	2	1419
Diatoma problematica Lange-Bertalot	DPRO	1	630
Diploneis separanda Lange-Bertalot	DSEP	2	274
Discostella woltereckii (Hustedt) Houk et Klee	DWOL	1	67
Encyonema lunatum (W. Smith) Van Heurck	ENLU	1	418
Encyonema minutum (Hilse) D.G. Mann	ENMI	1	213
Encyonema silesiacum (Bleisch) D.G. Mann	ESLE	1	821
Encyonema sp.1	ENCY	1	72
Encyonema ventricosum (C. Agardh) Grunow	ENVE	1	185
Encyonema vulgare Krammer var. vulgare	EVUL	1	2091
Eunotia bilunaris (Ehrenberg) Schaarschmidt	EBIL	1	617
Eunotia botuliformis Wild, Nörpel et Lange-Bertalot	EBOT	1	277
Eunotia exigua (Brébisson) Rabenhorst	EEXI	1	91
Eunotia implicata Nörpel-Schempp, Alles et Lange-Bertalot	EIMP	1	294
Eunotia incisa Gregory	EINC	1	494
Eunotia islandica Østrup	EISL	1	2707
Eunotia minor (Kützing) Grunow	EMIN	1	755
Eunotia nymanniana Grunow	ENYM	1	206
Eunotia paludosa Grunow	EUPA	1	206
Eunotia paratridentula Lange-Bertalot et Kulikovskiy	EPDT	1	105
Eunotia tenella (Grunow) Hustedt	ETEN	1	91
Eunotia valida Hustedt	EVAL	1	1105
Fallacia subhamulata (Grunow in Van Heurck) D.G. Mann	FSBH	3	238
Fragilaria gracilis Østrup	FGRA	4	92
Fragilaria pararumpens Lange-Bertalot, G. Hofmann et Werum	FPRU	1	194
Fragilaria pectinalis (O.F. Muller) Lyngbye	FPEC	1	155
Fragilaria rumpens (Kützing) Carlson	FRUM	1	233
Fragilaria tenera (W. Smith) Lange-Bertalot var. tenera	FTEN	4	201
Fragilaria vaucheriae (Kützing) J.B. Petersen	FVAU	1	294
Fragilariforma bicapitata (A. Mayer) D.M. Williams et Round	FFBI	1	208
Fragilariforma virescens (Ralfs) D.M. Williams et Round	FFVI	1	1519
Frustulia vulgaris (Thwaites) De Toni	FVUL	1	1625
Geissleria ignota (Krasske) Lange-Bertalot et Metzeltin	GINO	3	163
Gomphonema acidoclinatum Lange-Bertalot et Reichardt	GADC	1	873
Gomphonema acuminatum Ehrenberg var. acuminatum	GACU	1	1860
Gomphonema cf. angustatum (Kützing) Rabenhorst	GANG	1	216
Gomphonema clavatulum Reichardt	GCVT	1	216
Gomphonema graciledictum Reichardt	GGDI	1	573
Gomphonema innocens Reichardt	GINN	1	582
Gomphonema lippertii Reichardt et Lange-Bertalot	GLIP	1	573
Gomphonema micropus Kützing	GMIC	1	855
Gomphonema minutum (C. Agardh) C. Agardh	GMIN	1	318
Gomphonema olivaceum (Hornemann) Brébisson	GOLI	1	510
Gomphonema parvulum (Kützing) Kützing	GPAR	1	331
Gomphonema pseudoaugur Lange-Bertalot	GPSA	1	811
Gomphonema pumilum (Grunow) Reichardt et Lange-Bertalot	GPUM	1	270
Gomphonema sarcophagus Gregory	GSAR	1	573
Gomphonema sp.1	GOMS	1	482
Gomphonema subaequale Levkov	GSAQ	1	573
Gomphonema subclavatum (Grunow) Grunow	GSCL	1	573
Gomphonema truncatum Ehrenberg	GTRU	1	1243
Gyrosigma acuminatum (Kützing) Rabenhorst	GYAC	3	4237
Gyrosigma attenuatum (Kützing) Rabenhorst	GYAT	3	11622
Gyrosigma obtusatum (Sullivant et Wormley) C.S. Boyer	GYOB	3	1672
Halamphora montana (Krasske) Levkov	HLMO	2	482
Halamphora veneta (Kützing) Levkov	HVEN	2	3543
Hannaea arcus (Ehrenberg) R.M. Patrick	HARC	2	1462
Hantzschia abundans Lange-Bertalot	HABU	3	1224
Hantzschia amphioxys (Ehrenberg) Grunow	HAMP	3	486
Hippodonta capitata (Ehrenberg) Lange-Bertalot, Metzeltin et Witkowski	HCAP	3	324
Humidophila brekkaensis (J.B. Petersen) Lowe, Kociolek, J.R. Johansen, Van de Vijver, Lange-Bertalot et Kopalová	HBRE	1	179
Humidophila contenta (Grunow) Lowe, Kociolek, J.R. Johansen, Van de Vijver, Lange-Bertalot et Kopalová	HCOT	1	129
Humidophila irata (Krasske) Lowe, Kociolek, J.R. Johansen, Van de Vijver, Lange-Bertalot et Kopalová	HIRA	1	179
Humidophila perpussila (Grunow) Lowe, Kociolek, Johansen, Van de Vijver, Lange-Bertalot et Kopalová	DPER	1	152
Luticola frequentissima Levkov, Metzeltin et A. Pavlov	LFRQ	3	270
Luticola goeppertiana (Bleisch) D.G. Mann	LGOE	3	925
Luticola nivalis (Ehrenberg) D.G. Mann	LNIV	3	578
Luticola ventricosa (Kützing) D.G. Mann	LVEN	3	184
Mayamaea aff. arida (Bock) Lange-Bertalot	MARI	3	66
Mayamaea agrestis (Hustedt) Lange-Bertalot	MAGR	3	41
Mayamaea atomus (Kützing) Lange-Bertalot	MAAT	3	116
Mayamaea excelsa (Krasske) Lange-Bertalot	MAEX	3	191
Mayamaea fossalis (Krasske) Lange-Bertalot var. fossalis	MAFO	3	119
Mayamaea permitis (Hustedt) Bruder & Medlin	MPMI	3	66
Melosira varians C. Agardh	MVAR	1	3267
Meridion circulare (Gréville) C. Agardh var. circulare	MCIR	2	671
Meridion circulare var. constrictum (Ralfs) Van Heurck	MCON	2	671
Microcostatus aerophilus Stanek-Tarkowska, Noga, C.E. Wetzel et Ector	MAER	3	61
Microcostatus sp.1	MISP1	3	26
Microcostatus sp.2	MISP2	3	26
Navicula angusta Grunow	NAAN	3	1048
Navicula cf. witkowskii Lange-bertalot, Iserentant et Metzeltin	NWKO	3	1407
Navicula cincta (Ehrenberg) Ralfs var. heufleri Grunow f. curta	NCIH	3	449
Navicula cryptocephala Kützing	NCRY	3	431
Navicula exilis Kützing	NEXI	3	431
Navicula fritschii J.W.G. Lund	NFRH	3	198
Navicula germainii Wallace	NGER	3	539
Navicula gregaria Donkin	NGRE	3	485
Navicula hofmanniae Lange-Bertalot	NHOF	3	606
Navicula lanceolata (C. agardh) Ehrenberg	NLAN	3	1227
Navicula mensiculus Schumann	NMEN	3	741
Navicula rhynchocephala Kützing	NRHY	3	1582
Navicula slesvicensis Grunow	NSLE	3	961
Navicula tennelloides Hustedt	NTEN	3	137
Navicula tripunctata (O.F. Muller) Bory	NTPT	3	966
Navicula trivialis (Lange-Bertalot	NTRV	3	1097
Navicula veneta Kützing	NVEN	3	279
Neidiomorpha binodiformis (Krammer) Cantonati, Lange-Bertalot et Angeli	NDBF	3	375
Neidium affine (Ehrenberg) Pfitzer	NEAF	3	3143
Neidium alpinum Hustedt	NALP	3	196
Neidium ampliatum Krammer	NEAM	3	11899
Neidium longiceps (Gregory) Ross	NLGI	3	354
Nitzschia acicularis (Kützing) W. Smith	NACI	4	289
Nitzschia acidoclinata Lange-Bertalot	NACD	3	115
Nitzschia adamata Hustedt	NZAD	3	337
Nitzschia amphibia Grunow	NAMP	3	334
Nitzschia dissipata (Kützing) Grunow ssp. dissipata	NDIS	3	625
Nitzschia frequens Hustedt	NIFQ	3	327
Nitzschia hantzschiana Rabenhorst	NHAN	3	211
Nitzschia heufleriana Grunow	NHEU	3	1771
Nitzschia intermedia Hantzsch	NINT	3	1419
Nitzschia linearis (C. Agardh) W. Smith	NLIN	3	1624
Nitzschia palea (Kützing) W. Smith var. palea	NPAL	3	391
Nitzschia palea var. debilis (Kützing) Grunow	NPAD	3	235
Nitzschia palea var. tenuirostris sensu Lange-Bertalot	NPAT	3	391
Nitzschia paleoformis Hustedt	NIPF	3	229
Nitzschia pura Hustedt	NIPR	3	338
Nitzschia pusilla Grunow	NIPU	3	185
Nitzschia recta Hantzsch	NREC	3	871
Nitzschia solgensis Cleve-Euler	NSOL	3	259
Nitzschia soratensis E. Morales et Vis	NSTS	3	391
Nitzschia supralittorea Lange-Bertalot	NZSU	3	86
Nitzschia tenuis W. Smith	NITE	3	786
Nitzschia umbonata (Ehrenberg) Lange-Bertalot	NUMB	3	1436
Odontidium anceps (Ehrenberg) Ralfs	OANC	1	628
Odontidium mesodon (Ehrenberg) Kützing	DMES	1	1143
Orthoseira roeseana (Rabenhorst) O'Meara	OROE	0	3367
Pinnularia borealis Ehrenberg	PBOR	3	1258
Pinnularia brebissonii (Kützing) Rabenhorst	PBRE	3	2149
Pinnularia cf. decrescens (Grunow) Krammer	PDEC	3	3000
Pinnularia gibba Ehrenberg	PGIB	3	2321
Pinnularia lundii Hustedt	PLUN	3	1425
Pinnularia microstauron var. angusta Krammer	PMIA	3	362
Pinnularia obscura Krasske	POBS	3	248
Pinnularia perirrorata Krammer	PPRI	3	98
Pinnularia perspicua Krammer	PPPC	3	973
Pinnularia rupestris Hantzsch	PRUP	3	3459
Pinnularia schoenfelderii Krammer	PSHO	3	264
Pinnularia sp.1	PINN	3	1258
Pinnularia subcapitata f. typica J.B. Petersen	PSCT	3	253
Pinnularia viridiformis Krammer	PVFM	3	5994
Placoneis elginensis (Gregory) Cox	PELG	3	1266
Placoneis ignorata (Schimanski) Lange-Bertalot	PLIG	3	1266
Placoneis nanoclementis Lange-Bertalot et Wojtal	PNCL	3	597
Planothidium aff. granum (Hohn et Hellerman) Lange-Bertalot	PGRN	3	56
Planothidium dubium (Grunow) Round et Bukhtiyarova	PTDU	2	267
Planothidium frequentissimum (Lange-Bertalot) Lange-bertalot	PLFR	2	219
Planothidium lanceolatum (Brèbisson ex Kützing) Lange-Bertalot	PTLA	2	475
Planothidium rostratum (Østrup) Lange-Bertalot	PRST	2	267
Planothidium sp.1	PLTD	2	320
Geissleria acceptata (Hustedt) Lange-Bertalot & Metzeltin	GACC	3	118
Psammothidium daonense (Lange-Bertalot) Lange-Bertalot	PDAO	2	351
Psammothidium rostrogermainii Van de Vijver, Kopalova et Zidarova	PRGE	2	228
Psammothidium sp.1	PSMT	2	118
Pseudofallacia monoculata (Hustedt) Liu, Kociolek et Wang	PMOC	3	158
Pseudostaurosira parasitica (W. Smith) Morales var. parasitica	PPRS	1	133
Pseudostaurosira parasitica var. Subconstricta (Grunow) E. Morales	PPSC	1	95
Reimeria sinuata (Gregory) Kociolek et Stoermer	RSIN	2	406
Roicosphenia abbreviata (C. Agardh) Lange-Bertalot	RABB	2	568
Rossithidium petersenii (Hustedt) Round et Bukhtiyarova	ROPE	2	267
Sellaphora atomoides (Grunow) C.E. Wetzel et Van de Vijver	SEAT	3	66
Sellaphora lundii C.E. Wetzel, Barragán et Ector	SLUN	3	118
Sellaphora nana (Hustedt) Lange-Bertalot, Cavacini, Tagliaventi et Alfinito	SENA	3	118
Sellaphora pseudopupula (Krasske) Lange-Bertalot	SPPU	3	635
Sellaphora pupula (Kützing) Mereschkowsky	SPUP	3	1183
Sellaphora raederae (Lange-Bertalot) C.E. Wetzel	SRAE	3	47
Sellaphora stroemii (Hustedt) D.G. Mann	SSTM	3	108
Sellaphora subseminulum (Hustedt) C.E. Wetzel	SSSE	3	78
Simonsenia delongei (Grunow) Lange-Bertalot	SIDE	3	53
Stauroneis anceps Ehrenberg	STAN	3	5215
Stauroneis borichii (J.B.Petersen) J.W.G. Lund	SBOR	3	171
Stauroneis gracilis Ehrenberg	SGRC	3	1069
Stauroneis kriegeri Patrick	STKR	3	243
Stauroneis leguminopsis Lange-Bertalot et Krammer	SLGP	3	256
Stauroneis parathermicola Lange-Bertalot	SPTH	3	79
Stauroneis pseudagrestis Lange-Bertalot et Werum in Werum et Lange-Bertalot	SPDA	3	337
Stauroneis smithii Grunow	SSMI	3	522
Stauroneis sp.1	STAS	3	171
Stauroneis thermicola (J.B. Petersen) J.W.G Lund	STHE	3	79
Stauronella indubitabilis Lange-Bertalot et Genkal	SNIN	0	829
Staurosirella leptostauron (Ehrenberg) D.M. Williams et Round var. leptostauron	SLEP	1	962
Staurosirella pinnata (Ehrenberg) D.M. Williams et Round	SPIN	1	159
Stephanodiscus sp.1	STEP	4	113
Surirella angusta Kützing	SANG	3	1315
Surirella bifrons Ehrenberg	SBIF	3	38138
Surirella brebissonii var. kuetzengii Krammer et Lange-Bertalot	SBKU	3	999
Surirella minuta Brébisson ex Kützing	SUMI	3	1034
Surirella robusta Ehrenberg	SURO	3	179987
Surirella subsalsa W. Smith	SSSA	3	490
Surirella terricola Lange-Bertalot et Alles	STER	3	490
Tabellaria flocculosa (Roth) Kützing	TFLO	1	1261
Tryblionella calida (Grunow) D.G. Mann	TCAL	3	1686
Tryblionella debilis Arnott ex O'Meara	TDEB	3	265
Tryblionella hungarica (Grunow) Frenguelli	THUN	3	1417
Ulnaria acus (Kützing) Aboal	UACU	4	467
Ulnaria ulna (Nitzsch) Compère	UULN	4	4724

## Sheet: Turbidity Colpach 2018
DATE	Turbidity_NTU
2018-10-29 23:01:00	11.4
2018-10-29 23:06:00	11.1
2018-10-29 23:11:00	10.9
2018-10-29 23:16:00	11.9
2018-10-29 23:21:00	11.9
2018-10-29 23:26:00	11.4
2018-10-29 23:31:00	11.1
2018-10-29 23:36:00	11.1
2018-10-29 23:41:00	11.1
2018-10-29 23:46:00	11.0
2018-10-29 23:51:00	10.8
2018-10-29 23:56:00	10.8
2018-10-30 00:01:00	10.8
2018-10-30 00:06:00	10.8
2018-10-30 00:11:00	10.9
2018-10-30 00:16:00	10.9
2018-10-30 00:21:00	12.1
2018-10-30 00:26:00	26.2
2018-10-30 00:31:00	49.0
2018-10-30 00:36:00	59.9
2018-10-30 00:41:00	61.8
2018-10-30 00:46:00	54.6
2018-10-30 00:51:00	44.1
2018-10-30 00:56:00	36.8
2018-10-30 01:01:00	34.9
2018-10-30 01:06:00	35.0
2018-10-30 01:11:00	33.7
2018-10-30 01:16:00	33.3
2018-10-30 01:21:00	33.3
2018-10-30 01:26:00	32.0
2018-10-30 01:31:00	30.2
2018-10-30 01:36:00	27.2
2018-10-30 01:41:00	24.7
2018-10-30 01:46:00	21.5
2018-10-30 01:51:00	19.2
2018-10-30 01:56:00	17.8
2018-10-30 02:01:00	17.1
2018-10-30 02:06:00	16.4
2018-10-30 02:11:00	16.4
2018-10-30 02:16:00	16.7
2018-10-30 02:21:00	16.9
2018-10-30 02:26:00	17.3
2018-10-30 02:31:00	17.8
2018-10-30 02:36:00	17.8
2018-10-30 02:41:00	19.1
2018-10-30 02:46:00	18.9
2018-10-30 02:51:00	17.7
2018-10-30 02:56:00	17.5
2018-10-30 03:01:00	18.3
2018-10-30 03:06:00	18.2
2018-10-30 03:11:00	19.4
2018-10-30 03:16:00	28.3
2018-10-30 03:21:00	25.3
2018-10-30 03:26:00	23.9
2018-10-30 03:31:00	22.2
2018-10-30 03:36:00	20.5
2018-10-30 03:41:00	19.3
2018-10-30 03:46:00	18.9
2018-10-30 03:51:00	17.8
2018-10-30 03:56:00	17.2
2018-10-30 04:01:00	16.3
2018-10-30 04:06:00	15.7
2018-10-30 04:11:00	15.3
2018-10-30 04:16:00	15.0
2018-10-30 04:21:00	15.0
2018-10-30 04:26:00	14.9
2018-10-30 04:31:00	14.4
2018-10-30 04:36:00	17.3
2018-10-30 04:41:00	21.0
2018-10-30 04:46:00	22.2
2018-10-30 04:51:00	22.7
2018-10-30 04:56:00	23.6
2018-10-30 05:01:00	21.0
2018-10-30 05:06:00	20.0
2018-10-30 05:11:00	18.9
2018-10-30 05:16:00	17.7
2018-10-30 05:21:00	17.1
2018-10-30 05:26:00	16.3
2018-10-30 05:31:00	16.2
2018-10-30 05:36:00	15.8
2018-10-30 05:41:00	16.4
2018-10-30 05:46:00	15.8
2018-10-30 05:51:00	15.2
2018-10-30 05:56:00	15.0
2018-10-30 06:01:00	14.8
2018-10-30 06:06:00	14.5
2018-10-30 06:11:00	14.4
2018-10-30 06:16:00	14.4
2018-10-30 06:21:00	14.1
2018-10-30 06:26:00	14.3
2018-10-30 06:31:00	14.0
2018-10-30 06:36:00	14.1
2018-10-30 06:41:00	13.9
2018-10-30 06:46:00	14.0
2018-10-30 06:51:00	13.9
2018-10-30 06:56:00	13.6
2018-10-30 07:01:00	13.4
2018-10-30 07:06:00	13.3
2018-10-30 07:11:00	13.3
2018-10-30 07:16:00	14.8
2018-10-30 07:21:00	13.4
2018-10-30 07:26:00	13.0
2018-10-30 07:31:00	13.0
2018-10-30 07:36:00	13.1
2018-10-30 07:41:00	13.1
2018-10-30 07:46:00	13.0
2018-10-30 07:51:00	12.8
2018-10-30 07:56:00	12.9
2018-10-30 08:01:00	12.8
2018-10-30 08:06:00	12.8
2018-10-30 08:11:00	12.7
2018-10-30 08:16:00	12.7
2018-10-30 08:21:00	13.0
2018-10-30 08:26:00	13.0
2018-10-30 08:31:00	13.0
2018-10-30 08:36:00	13.0
2018-10-30 08:41:00	12.9
2018-10-30 08:46:00	13.3
2018-10-30 08:51:00	13.7
2018-10-30 08:56:00	13.9
2018-10-30 09:01:00	14.5
2018-10-30 09:06:00	14.4
2018-10-30 09:11:00	14.5
2018-10-30 09:16:00	14.4
2018-10-30 09:21:00	14.5
2018-10-30 09:26:00	14.6
2018-10-30 09:31:00	14.2
2018-10-30 09:36:00	14.0
2018-10-30 09:41:00	13.9
2018-10-30 09:46:00	13.9
2018-10-30 09:51:00	13.8
2018-10-30 09:56:00	13.7
2018-10-30 10:01:00	13.6
2018-10-30 10:06:00	13.9
2018-10-30 10:11:00	13.8
2018-10-30 10:16:00	13.8
2018-10-30 10:21:00	13.7
2018-10-30 10:26:00	14.1
2018-10-30 10:31:00	13.7
2018-10-30 10:36:00	13.7
2018-10-30 10:41:00	13.6
2018-10-30 10:46:00	13.6
2018-10-30 10:51:00	13.4
2018-10-30 10:56:00	13.4
2018-10-30 11:01:00	13.2
2018-10-30 11:06:00	13.1
2018-10-30 11:11:00	13.0
2018-10-30 11:16:00	12.9
2018-10-30 11:21:00	13.0
2018-10-30 11:26:00	13.0
2018-10-30 11:31:00	12.8
2018-10-30 11:36:00	12.8
2018-10-30 11:41:00	12.8
2018-10-30 11:46:00	12.7
2018-10-30 11:51:00	12.6
2018-10-30 11:56:00	12.5
2018-10-30 12:01:00	12.4
2018-10-30 12:06:00	12.4
2018-10-30 12:11:00	12.3
2018-10-30 12:16:00	12.3
2018-10-30 12:21:00	12.4
2018-10-30 12:41:00	11.9
2018-10-30 12:46:00	11.7
2018-10-30 12:51:00	11.6
2018-10-30 12:56:00	11.4
2018-10-30 13:01:00	11.5
2018-10-30 13:06:00	11.5
2018-10-30 13:11:00	11.7
2018-10-30 13:16:00	11.7
2018-10-30 13:21:00	11.7
2018-10-30 13:26:00	11.7
2018-10-30 13:31:00	11.5
2018-10-30 13:36:00	11.7
2018-10-30 13:41:00	11.8
2018-10-30 13:46:00	12.0
2018-10-30 13:51:00	12.0
2018-10-30 13:56:00	12.3
2018-10-30 14:01:00	12.5
2018-10-30 14:06:00	12.9
2018-10-30 14:11:00	13.4
2018-10-30 14:16:00	14.1
2018-10-30 14:21:00	14.8
2018-10-30 14:26:00	15.6
2018-10-30 14:31:00	15.5
2018-10-30 14:36:00	15.7
2018-10-30 14:41:00	16.4
2018-10-30 14:46:00	16.2
2018-10-30 14:51:00	16.4
2018-10-30 14:56:00	16.6
2018-10-30 15:01:00	18.5
2018-10-30 15:06:00	17.1
2018-10-30 15:11:00	17.9
2018-10-30 15:16:00	19.2
2018-10-30 15:21:00	19.8
2018-10-30 15:26:00	20.5
2018-10-30 15:31:00	21.6
2018-10-30 15:36:00	21.7
2018-10-30 15:41:00	21.9
2018-10-30 15:46:00	22.2
2018-10-30 15:51:00	23.9
2018-10-30 15:56:00	24.7
2018-10-30 16:01:00	25.2
2018-10-30 16:06:00	27.2
2018-10-30 16:11:00	28.0
2018-10-30 16:16:00	26.7
2018-10-30 16:21:00	28.7
2018-10-30 16:26:00	27.5
2018-10-30 16:31:00	28.1
2018-10-30 16:36:00	28.8
2018-10-30 16:41:00	28.9
2018-10-30 16:46:00	28.0
2018-10-30 16:51:00	27.7
2018-10-30 16:56:00	27.9
2018-10-30 17:01:00	26.6
2018-10-30 17:06:00	25.3
2018-10-30 17:11:00	24.1
2018-10-30 17:16:00	23.5
2018-10-30 17:21:00	23.6
2018-10-30 17:26:00	23.2
2018-10-30 17:31:00	22.2
2018-10-30 17:36:00	21.9
2018-10-30 17:41:00	22.6
2018-10-30 17:46:00	20.7
2018-10-30 17:51:00	20.3
2018-10-30 17:56:00	20.4
2018-10-30 18:01:00	20.0
2018-10-30 18:06:00	19.2
2018-10-30 18:11:00	19.5
2018-10-30 18:16:00	21.4
2018-10-30 18:21:00	20.9
2018-10-30 18:26:00	22.3
2018-10-30 18:31:00	47.6
2018-10-30 18:36:00	68.5
2018-10-30 18:41:00	49.2
2018-10-30 18:46:00	46.0
2018-10-30 18:51:00	37.1
2018-10-30 18:56:00	38.3
2018-10-30 19:01:00	36.6
2018-10-30 19:06:00	36.6
2018-10-30 19:11:00	35.3
2018-10-30 19:16:00	34.4
2018-10-30 19:21:00	31.7
2018-10-30 19:26:00	32.4
2018-10-30 19:31:00	30.5
2018-10-30 19:36:00	33.0
2018-10-30 19:41:00	29.4
2018-10-30 19:46:00	30.3
2018-10-30 19:51:00	29.4
2018-10-30 19:56:00	29.3
2018-10-30 20:01:00	28.5
2018-10-30 20:06:00	28.3
2018-10-30 20:11:00	30.2
2018-10-30 20:16:00	27.8
2018-10-30 20:21:00	29.1
2018-10-30 20:26:00	28.0
2018-10-30 20:31:00	27.5
2018-10-30 20:36:00	30.6
2018-10-30 20:41:00	32.7
2018-10-30 20:46:00	33.3
2018-10-30 20:51:00	30.2
2018-10-30 20:56:00	27.1
2018-10-30 21:01:00	24.8
2018-10-30 21:06:00	22.8
2018-10-30 21:11:00	22.2
2018-10-30 21:16:00	20.6
2018-10-30 21:21:00	19.7
2018-10-30 21:26:00	20.8
2018-10-30 21:31:00	18.9
2018-10-30 21:36:00	19.2
2018-10-30 21:41:00	20.3
2018-10-30 21:46:00	18.6
2018-10-30 21:51:00	18.4
2018-10-30 21:56:00	18.4
2018-10-30 22:01:00	18.3
2018-10-30 22:06:00	19.2
2018-10-30 22:11:00	18.4
2018-10-30 22:16:00	18.4
2018-10-30 22:21:00	18.3
2018-10-30 22:26:00	18.7
2018-10-30 22:31:00	18.4
2018-10-30 22:36:00	18.4
2018-10-30 22:41:00	17.7
2018-10-30 22:46:00	18.8
2018-10-30 22:51:00	19.1
2018-10-30 22:56:00	20.5
2018-10-30 23:01:00	19.3
2018-10-30 23:06:00	19.5
2018-10-30 23:11:00	22.5
2018-10-30 23:16:00	22.5
2018-10-30 23:21:00	23.1
2018-10-30 23:26:00	24.5
2018-10-30 23:31:00	28.0
2018-10-30 23:36:00	32.0
2018-10-30 23:41:00	32.7
2018-10-30 23:46:00	34.6
2018-10-30 23:51:00	38.4
2018-10-30 23:56:00	41.7
2018-10-31 00:01:00	42.9
2018-10-31 00:06:00	42.4
2018-10-31 00:11:00	44.1
2018-10-31 00:16:00	45.5
2018-10-31 00:21:00	48.4
2018-10-31 00:26:00	45.1
2018-10-31 00:31:00	45.3
2018-10-31 00:36:00	45.9
2018-10-31 00:41:00	39.4
2018-10-31 00:46:00	38.6
2018-10-31 00:51:00	37.2
2018-10-31 00:56:00	33.9
2018-10-31 01:01:00	32.8
2018-10-31 01:06:00	32.2
2018-10-31 01:11:00	32.0
2018-10-31 01:16:00	29.2
2018-10-31 01:21:00	28.7
2018-10-31 01:26:00	26.4
2018-10-31 01:31:00	32.1
2018-10-31 01:36:00	35.4
2018-10-31 01:41:00	33.3
2018-10-31 01:46:00	31.3
2018-10-31 01:51:00	27.2
2018-10-31 01:56:00	26.1
2018-10-31 02:01:00	26.2
2018-10-31 02:06:00	26.2
2018-10-31 02:11:00	26.4
2018-10-31 02:16:00	25.6
2018-10-31 02:21:00	25.7
2018-10-31 02:26:00	23.3
2018-10-31 02:31:00	21.8
2018-10-31 02:36:00	20.8
2018-10-31 02:41:00	19.8
2018-10-31 02:46:00	19.3
2018-10-31 02:51:00	21.2
2018-10-31 02:56:00	20.5
2018-10-31 03:01:00	18.2
2018-10-31 03:06:00	19.4
2018-10-31 03:11:00	18.4
2018-10-31 03:16:00	19.3
2018-10-31 03:21:00	18.0
2018-10-31 03:26:00	18.5
2018-10-31 03:31:00	17.1
2018-10-31 03:36:00	17.8
2018-10-31 03:41:00	18.3
2018-10-31 03:46:00	16.6
2018-10-31 03:51:00	17.4
2018-10-31 03:56:00	16.7
2018-10-31 04:01:00	16.1
2018-10-31 04:06:00	16.1
2018-10-31 04:11:00	15.9
2018-10-31 04:16:00	15.8
2018-10-31 04:21:00	16.8
2018-10-31 04:26:00	15.9
2018-10-31 04:31:00	15.8
2018-10-31 04:36:00	16.7
2018-10-31 04:41:00	16.3
2018-10-31 04:46:00	16.8
2018-10-31 04:51:00	16.1
2018-10-31 04:56:00	16.0
2018-10-31 05:01:00	15.5
2018-10-31 05:06:00	16.6
2018-10-31 05:11:00	15.0
2018-10-31 05:16:00	15.8
2018-10-31 05:21:00	14.8
2018-10-31 05:26:00	15.0
2018-10-31 05:31:00	15.7
2018-10-31 05:36:00	15.6
2018-10-31 05:41:00	14.7
2018-10-31 05:46:00	15.0
2018-10-31 05:51:00	14.7
2018-10-31 05:56:00	14.5
2018-10-31 06:01:00	14.7
2018-10-31 06:06:00	14.5
2018-10-31 06:11:00	15.8
2018-10-31 06:16:00	14.4
2018-10-31 06:21:00	14.4
2018-10-31 06:26:00	14.2
2018-10-31 06:31:00	15.4
2018-10-31 06:36:00	14.1
2018-10-31 06:41:00	14.3
2018-10-31 06:46:00	14.3
2018-10-31 06:51:00	14.3
2018-10-31 06:56:00	14.2
2018-10-31 07:01:00	15.5
2018-10-31 07:06:00	18.3
2018-10-31 07:11:00	16.1
2018-10-31 07:16:00	15.8
2018-10-31 07:21:00	15.9
2018-10-31 07:26:00	16.7
2018-10-31 07:31:00	14.8
2018-10-31 07:36:00	13.9
2018-10-31 07:41:00	14.3
2018-10-31 07:46:00	15.1
2018-10-31 07:51:00	13.8
2018-10-31 07:56:00	15.1
2018-10-31 08:01:00	15.9
2018-10-31 08:06:00	18.5
2018-10-31 08:11:00	22.2
2018-10-31 08:16:00	20.5
2018-10-31 08:21:00	18.8
2018-10-31 08:26:00	17.8
2018-10-31 08:31:00	15.8
2018-10-31 08:36:00	15.1
2018-10-31 08:41:00	15.3
2018-10-31 08:46:00	15.3
2018-10-31 08:51:00	15.4
2018-10-31 08:56:00	15.9
2018-10-31 09:01:00	15.1
2018-10-31 09:06:00	14.7
2018-10-31 09:11:00	15.0
2018-10-31 09:16:00	15.9
2018-10-31 09:21:00	15.7
2018-10-31 09:26:00	17.3
2018-10-31 09:31:00	15.8
2018-10-31 09:36:00	15.9
2018-10-31 09:41:00	14.7
2018-10-31 09:46:00	15.3
2018-10-31 09:51:00	18.1
2018-10-31 09:56:00	16.7
2018-10-31 10:01:00	16.9
2018-10-31 10:06:00	17.3
2018-10-31 10:11:00	15.0
2018-10-31 10:16:00	15.0
2018-10-31 10:21:00	15.5
2018-10-31 10:26:00	14.2
2018-10-31 10:31:00	15.7
2018-10-31 10:36:00	14.4
2018-10-31 10:41:00	15.5
2018-10-31 10:46:00	15.5
2018-10-31 10:51:00	14.3
2018-10-31 10:56:00	14.1
2018-10-31 11:01:00	14.5
2018-10-31 11:06:00	14.0
2018-10-31 11:11:00	14.2
2018-10-31 11:16:00	15.0
2018-10-31 11:21:00	14.7
2018-10-31 11:26:00	14.5
2018-10-31 11:31:00	13.9
2018-10-31 11:36:00	13.7
2018-10-31 11:41:00	13.4
2018-10-31 11:46:00	13.8
2018-10-31 11:51:00	14.6
2018-10-31 11:56:00	16.0
2018-10-31 12:01:00	13.9
2018-10-31 12:06:00	13.9
2018-10-31 12:11:00	13.9
2018-10-31 12:16:00	14.1
2018-10-31 12:21:00	15.3
2018-10-31 12:26:00	15.9
2018-10-31 12:31:00	15.4
2018-10-31 12:36:00	15.0
2018-10-31 12:41:00	14.2
2018-10-31 12:46:00	14.4
2018-10-31 12:51:00	13.7
2018-10-31 12:56:00	15.1
2018-10-31 13:01:00	14.2
2018-10-31 13:06:00	13.5
2018-10-31 13:11:00	14.7
2018-10-31 13:16:00	14.5
2018-10-31 13:21:00	14.2
2018-10-31 13:26:00	14.0
2018-10-31 13:31:00	13.7
2018-10-31 13:36:00	14.0
2018-10-31 13:41:00	13.6
2018-10-31 13:46:00	13.6
2018-10-31 13:51:00	13.6
2018-10-31 13:56:00	13.8
2018-10-31 14:01:00	13.4
2018-10-31 14:06:00	13.4
2018-10-31 14:11:00	13.7
2018-10-31 14:16:00	13.3
2018-10-31 14:21:00	13.3
2018-10-31 14:26:00	17.7
2018-10-31 14:31:00	13.4
2018-10-31 14:36:00	14.5
2018-10-31 14:41:00	14.1
2018-10-31 14:46:00	13.4
2018-10-31 14:51:00	13.4
2018-10-31 14:56:00	13.4
2018-10-31 15:01:00	13.3
2018-10-31 15:06:00	13.3
2018-10-31 15:11:00	13.4
2018-10-31 15:16:00	14.5
2018-10-31 15:21:00	13.1
2018-10-31 15:26:00	13.3
2018-10-31 15:31:00	14.1
2018-10-31 15:36:00	13.0
2018-10-31 15:41:00	13.2
2018-10-31 15:46:00	14.4
2018-10-31 15:51:00	16.4
2018-10-31 15:56:00	15.0
2018-10-31 16:01:00	14.9
2018-10-31 16:06:00	14.4
2018-10-31 16:11:00	13.9
2018-10-31 16:16:00	13.5
2018-10-31 16:21:00	14.1
2018-10-31 16:26:00	14.2
2018-10-31 16:31:00	14.2
2018-10-31 16:36:00	14.0
2018-10-31 16:41:00	14.1
2018-10-31 16:46:00	13.7
2018-10-31 16:51:00	13.3
2018-10-31 16:56:00	13.1
2018-10-31 17:01:00	13.1
2018-10-31 17:06:00	13.0
2018-10-31 17:11:00	13.0
2018-10-31 17:16:00	13.0
2018-10-31 17:21:00	13.1
2018-10-31 17:26:00	14.4
2018-10-31 17:31:00	14.3
2018-10-31 17:36:00	14.1
2018-10-31 17:41:00	13.7
2018-10-31 17:46:00	13.6
2018-10-31 17:51:00	13.5
2018-10-31 17:56:00	13.6
2018-10-31 18:01:00	13.7
2018-10-31 18:06:00	13.4
2018-10-31 18:11:00	13.3
2018-10-31 18:16:00	13.4
2018-10-31 18:21:00	13.0
2018-10-31 18:26:00	12.9
2018-10-31 18:31:00	12.8
2018-10-31 18:36:00	13.1
2018-10-31 18:41:00	13.1
2018-10-31 18:46:00	12.5
2018-10-31 18:51:00	12.8
2018-10-31 18:56:00	12.6
2018-10-31 19:01:00	12.8
2018-10-31 19:06:00	12.7
2018-10-31 19:11:00	12.8
2018-10-31 19:16:00	13.0
2018-10-31 19:21:00	12.6
2018-10-31 19:26:00	12.5
2018-10-31 19:31:00	12.5
2018-10-31 19:36:00	12.5
2018-10-31 19:41:00	13.6
2018-10-31 19:46:00	12.5
2018-10-31 19:51:00	12.4
2018-10-31 19:56:00	12.6
2018-10-31 20:01:00	12.8
2018-10-31 20:06:00	12.4
2018-10-31 20:11:00	12.6
2018-10-31 20:16:00	12.3
2018-10-31 20:21:00	13.0
2018-10-31 20:26:00	12.4
2018-10-31 20:31:00	12.5
2018-10-31 20:36:00	12.6
2018-10-31 20:41:00	13.5
2018-10-31 20:46:00	12.8
2018-10-31 20:51:00	12.5
2018-10-31 20:56:00	12.5
2018-10-31 21:01:00	12.9
2018-10-31 21:06:00	12.3
2018-10-31 21:11:00	12.5
2018-10-31 21:16:00	12.5
2018-10-31 21:21:00	12.3
2018-10-31 21:26:00	12.3
2018-10-31 21:31:00	12.3
2018-10-31 21:36:00	12.5
2018-10-31 21:41:00	12.4
2018-10-31 21:46:00	12.7
2018-10-31 21:51:00	12.5
2018-10-31 21:56:00	12.8
2018-10-31 22:01:00	12.3
2018-10-31 22:06:00	12.8
2018-10-31 22:11:00	12.6
2018-10-31 22:16:00	12.3
2018-10-31 22:21:00	12.2
2018-10-31 22:26:00	13.2
2018-10-31 22:31:00	12.3
2018-10-31 22:36:00	12.5
2018-10-31 22:41:00	12.4
2018-10-31 22:46:00	12.2
2018-10-31 22:51:00	12.3
2018-10-31 22:56:00	12.8
2018-10-31 23:01:00	12.2
2018-10-31 23:06:00	12.4
2018-10-31 23:11:00	12.4
2018-10-31 23:16:00	12.1
2018-10-31 23:21:00	12.5
2018-10-31 23:26:00	12.1
2018-10-31 23:31:00	12.1
2018-10-31 23:36:00	12.2
2018-10-31 23:41:00	12.2
2018-10-31 23:46:00	12.1
2018-10-31 23:51:00	12.0
2018-10-31 23:56:00	12.2
2018-11-01 00:01:00	12.2
2018-11-01 00:06:00	12.3
2018-11-01 00:11:00	12.2
2018-11-01 00:16:00	12.5
2018-11-01 00:21:00	12.2
2018-11-01 00:26:00	12.0
2018-11-01 00:31:00	12.1
2018-11-01 00:36:00	12.2
2018-11-01 00:41:00	12.2
2018-11-01 00:46:00	12.2
2018-11-01 00:51:00	12.2
2018-11-01 00:56:00	12.5
2018-11-01 01:01:00	12.1
2018-11-01 01:06:00	12.0
2018-11-01 01:11:00	12.1
2018-11-01 01:16:00	12.0
2018-11-01 01:21:00	12.1
2018-11-01 01:26:00	12.1
2018-11-01 01:31:00	12.9
2018-11-01 01:36:00	12.3
2018-11-01 01:41:00	12.1
2018-11-01 01:46:00	12.0
2018-11-01 01:51:00	12.2
2018-11-01 01:56:00	12.0
2018-11-01 02:01:00	12.0
2018-11-01 02:06:00	11.9
2018-11-01 02:11:00	12.0
2018-11-01 02:16:00	12.1
2018-11-01 02:21:00	12.2
2018-11-01 02:26:00	12.2
2018-11-01 02:31:00	12.1
2018-11-01 02:36:00	12.2
2018-11-01 02:41:00	11.9
2018-11-01 02:46:00	12.0
2018-11-01 02:51:00	11.9
2018-11-01 02:56:00	11.9
2018-11-01 03:01:00	12.2
2018-11-01 03:06:00	11.7
2018-11-01 03:11:00	11.9
2018-11-01 03:16:00	11.9
2018-11-01 03:21:00	12.0
2018-11-01 03:26:00	11.7
2018-11-01 03:31:00	11.9
2018-11-01 03:36:00	11.8
2018-11-01 03:41:00	11.7
2018-11-01 03:46:00	11.8
2018-11-01 03:51:00	11.9
2018-11-01 03:56:00	12.0
2018-11-01 04:01:00	12.0
2018-11-01 04:06:00	11.8
2018-11-01 04:11:00	11.7
2018-11-01 04:16:00	11.9
2018-11-01 04:21:00	11.8
2018-11-01 04:26:00	11.7
2018-11-01 04:31:00	11.8
2018-11-01 04:36:00	11.7
2018-11-01 04:41:00	11.9
2018-11-01 04:46:00	11.9
2018-11-01 04:51:00	11.8
2018-11-01 04:56:00	11.8
2018-11-01 05:01:00	11.7
2018-11-01 05:06:00	11.8
2018-11-01 05:11:00	11.8
2018-11-01 05:16:00	11.8
2018-11-01 05:21:00	11.7
2018-11-01 05:26:00	11.8
2018-11-01 05:31:00	11.7
2018-11-01 05:36:00	11.7
2018-11-01 05:41:00	11.7
2018-11-01 05:46:00	11.7
2018-11-01 05:51:00	11.6
2018-11-01 05:56:00	12.2
2018-11-01 06:01:00	11.9
2018-11-01 06:06:00	11.6
2018-11-01 06:11:00	11.6
2018-11-01 06:16:00	11.9
2018-11-01 06:21:00	11.9
2018-11-01 06:26:00	11.7
2018-11-01 06:31:00	11.9
2018-11-01 06:36:00	11.9
2018-11-01 06:41:00	11.5
2018-11-01 06:46:00	11.7
2018-11-01 06:51:00	11.5
2018-11-01 06:56:00	11.5
2018-11-01 07:01:00	11.5
2018-11-01 07:06:00	11.6
2018-11-01 07:11:00	11.7
2018-11-01 07:16:00	11.5
2018-11-01 07:21:00	11.7
2018-11-01 07:26:00	11.6
2018-11-01 07:31:00	11.5
2018-11-01 07:36:00	11.5
2018-11-01 07:41:00	11.7
2018-11-01 07:46:00	11.7
2018-11-01 07:51:00	12.1
2018-11-01 07:56:00	12.6
2018-11-01 08:01:00	13.3
2018-11-01 08:06:00	13.4
2018-11-01 08:11:00	13.4
2018-11-01 08:16:00	13.9
2018-11-01 08:21:00	12.8
2018-11-01 08:26:00	12.9
2018-11-01 08:31:00	12.3
2018-11-01 08:36:00	13.3
2018-11-01 08:41:00	12.1
2018-11-01 08:46:00	12.0
2018-11-01 08:51:00	11.9
2018-11-01 08:56:00	12.1
2018-11-01 09:01:00	11.8
2018-11-01 09:06:00	12.4
2018-11-01 09:11:00	11.9
2018-11-01 09:16:00	12.0
2018-11-01 09:21:00	12.9
2018-11-01 09:26:00	14.3
2018-11-01 09:31:00	14.2
2018-11-01 09:36:00	17.3
2018-11-01 09:41:00	17.5
2018-11-01 09:46:00	17.7
2018-11-01 09:51:00	17.4
2018-11-01 09:56:00	16.3
2018-11-01 10:01:00	15.3
2018-11-01 10:06:00	14.7
2018-11-01 10:11:00	14.1
2018-11-01 10:16:00	13.7
2018-11-01 10:21:00	13.4
2018-11-01 10:26:00	12.9
2018-11-01 10:31:00	12.6
2018-11-01 10:36:00	12.5
2018-11-01 10:41:00	12.5
2018-11-01 10:46:00	12.3
2018-11-01 10:51:00	12.0
2018-11-01 10:56:00	12.0
2018-11-01 11:01:00	12.0
2018-11-01 11:06:00	11.9
2018-11-01 11:11:00	11.7
2018-11-01 11:16:00	11.7
2018-11-01 11:21:00	11.5
2018-11-01 11:26:00	11.6
2018-11-01 11:31:00	11.7
2018-11-01 11:36:00	11.8
2018-11-01 11:41:00	12.0
2018-11-01 11:46:00	12.1
2018-11-01 11:51:00	12.5
2018-11-01 11:56:00	12.4
2018-11-01 12:01:00	11.8
2018-11-01 12:06:00	11.7
2018-11-01 12:11:00	11.8
2018-11-01 12:16:00	11.8
2018-11-01 12:21:00	11.7
2018-11-01 12:26:00	11.8
2018-11-01 12:31:00	11.8
2018-11-01 12:36:00	11.7
2018-11-01 12:41:00	11.5
2018-11-01 12:46:00	11.5
2018-11-01 12:51:00	11.6
2018-11-01 12:56:00	11.5
2018-11-01 13:01:00	11.6
2018-11-01 13:06:00	11.6
2018-11-01 13:11:00	11.6
2018-11-01 13:16:00	11.5
2018-11-01 13:21:00	11.7
2018-11-01 13:26:00	11.5
2018-11-01 13:31:00	11.4
2018-11-01 13:36:00	11.5
2018-11-01 13:41:00	12.2
2018-11-01 13:46:00	13.0
2018-11-01 13:51:00	13.2
2018-11-01 13:56:00	13.1
2018-11-01 14:01:00	13.1
2018-11-01 14:06:00	13.4
2018-11-01 14:11:00	13.8
2018-11-01 14:16:00	13.7
2018-11-01 14:21:00	13.8
2018-11-01 14:26:00	13.8
2018-11-01 14:31:00	13.6
2018-11-01 14:36:00	13.6
2018-11-01 14:41:00	13.4
2018-11-01 14:46:00	13.3
2018-11-01 14:51:00	13.1
2018-11-01 14:56:00	12.8
2018-11-01 15:01:00	12.6
2018-11-01 15:06:00	12.2
2018-11-01 15:11:00	12.2
2018-11-01 15:16:00	12.0
2018-11-01 15:21:00	11.9
2018-11-01 15:26:00	12.0
2018-11-01 15:31:00	11.8
2018-11-01 15:36:00	11.7
2018-11-01 15:41:00	11.9
2018-11-01 15:46:00	12.0
2018-11-01 15:51:00	12.0
2018-11-01 15:56:00	12.1
2018-11-01 16:01:00	12.1
2018-11-01 16:06:00	11.9
2018-11-01 16:11:00	11.9
2018-11-01 16:16:00	12.5
2018-11-01 16:21:00	11.7
2018-11-01 16:26:00	11.7
2018-11-01 16:31:00	11.6
2018-11-01 16:36:00	11.5
2018-11-01 16:41:00	11.5
2018-11-01 16:46:00	11.5
2018-11-01 16:51:00	11.5
2018-11-01 16:56:00	11.5
2018-11-01 17:01:00	11.8
2018-11-01 17:06:00	12.0
2018-11-01 17:11:00	12.5
2018-11-01 17:16:00	12.2
2018-11-01 17:21:00	12.0
2018-11-01 17:26:00	12.2
2018-11-01 17:31:00	11.9
2018-11-01 17:36:00	11.9
2018-11-01 17:41:00	11.7
2018-11-01 17:46:00	11.6
2018-11-01 17:51:00	11.6
2018-11-01 17:56:00	11.9
2018-11-01 18:01:00	11.7
2018-11-01 18:06:00	11.5
2018-11-01 18:11:00	11.7
2018-11-01 18:16:00	11.7
2018-11-01 18:21:00	11.7
2018-11-01 18:26:00	11.6
2018-11-01 18:31:00	11.7
2018-11-01 18:36:00	11.7
2018-11-01 18:41:00	12.4
2018-11-01 18:46:00	12.2
2018-11-01 18:51:00	12.4
2018-11-01 18:56:00	12.9
2018-11-01 19:01:00	13.4
2018-11-01 19:06:00	14.7
2018-11-01 19:11:00	15.9
2018-11-01 19:16:00	15.2
2018-11-01 19:21:00	14.4
2018-11-01 19:26:00	14.2
2018-11-01 19:31:00	13.6
2018-11-01 19:36:00	13.3
2018-11-01 19:41:00	12.9
2018-11-01 19:46:00	12.6
2018-11-01 19:51:00	12.4
2018-11-01 19:56:00	13.9
2018-11-01 20:01:00	12.6
2018-11-01 20:06:00	12.2
2018-11-01 20:11:00	12.1
2018-11-01 20:16:00	12.0
2018-11-01 20:21:00	12.1
2018-11-01 20:26:00	11.9
2018-11-01 20:31:00	12.1
2018-11-01 20:36:00	11.7
2018-11-01 20:41:00	12.0
2018-11-01 20:46:00	11.9
2018-11-01 20:51:00	11.9
2018-11-01 20:56:00	11.7
2018-11-01 21:01:00	11.7
2018-11-01 21:06:00	12.3
2018-11-01 21:11:00	11.8
2018-11-01 21:16:00	11.7
2018-11-01 21:21:00	11.8
2018-11-01 21:26:00	11.8
2018-11-01 21:31:00	11.8
2018-11-01 21:36:00	11.8
2018-11-01 21:41:00	11.7
2018-11-01 21:46:00	11.6
2018-11-01 21:51:00	11.6
2018-11-01 21:56:00	11.7
2018-11-01 22:01:00	11.7
2018-11-01 22:06:00	11.7
2018-11-01 22:11:00	11.4
2018-11-01 22:16:00	11.6
2018-11-01 22:21:00	11.6
2018-11-01 22:26:00	11.5
2018-11-01 22:31:00	11.7
2018-11-01 22:36:00	11.5
2018-11-01 22:41:00	11.7
2018-11-01 22:46:00	11.5
2018-11-01 22:51:00	11.4
2018-11-01 22:56:00	11.5
2018-11-01 23:01:00	11.9
2018-11-01 23:06:00	11.6
2018-11-01 23:11:00	11.7
2018-11-01 23:16:00	11.8
2018-11-01 23:21:00	11.7
2018-11-01 23:26:00	12.1
2018-11-01 23:31:00	12.5
2018-11-01 23:36:00	14.4
2018-11-01 23:41:00	13.7
2018-11-01 23:46:00	13.6
2018-11-01 23:51:00	14.6
2018-11-01 23:56:00	14.3
2018-11-02 00:01:00	14.4
2018-11-02 00:06:00	14.2
2018-11-02 00:11:00	14.3
2018-11-02 00:16:00	14.4
2018-11-02 00:21:00	16.2
2018-11-02 00:26:00	14.7
2018-11-02 00:31:00	14.0
2018-11-02 00:36:00	14.1
2018-11-02 00:41:00	13.9
2018-11-02 00:46:00	14.1
2018-11-02 00:51:00	13.9
2018-11-02 00:56:00	13.7
2018-11-02 01:01:00	14.1
2018-11-02 01:06:00	13.7
2018-11-02 01:11:00	13.7
2018-11-02 01:16:00	13.9
2018-11-02 01:21:00	13.3
2018-11-02 01:26:00	13.9
2018-11-02 01:31:00	13.7
2018-11-02 01:36:00	13.0
2018-11-02 01:41:00	13.1
2018-11-02 01:46:00	13.0
2018-11-02 01:51:00	13.1
2018-11-02 01:56:00	13.0
2018-11-02 02:01:00	13.0
2018-11-02 02:06:00	13.0
2018-11-02 02:11:00	13.1
2018-11-02 02:16:00	13.0
2018-11-02 02:21:00	12.7
2018-11-02 02:26:00	12.8
2018-11-02 02:31:00	12.6
2018-11-02 02:36:00	12.6
2018-11-02 02:41:00	13.0
2018-11-02 02:46:00	12.3
2018-11-02 02:51:00	12.3
2018-11-02 02:56:00	12.3
2018-11-02 03:01:00	12.2
2018-11-02 03:06:00	12.2
2018-11-02 03:11:00	12.6
2018-11-02 03:16:00	12.4
2018-11-02 03:21:00	12.2
2018-11-02 03:26:00	12.1
2018-11-02 03:31:00	12.0
2018-11-02 03:36:00	12.3
2018-11-02 03:41:00	12.4
2018-11-02 03:46:00	12.0
2018-11-02 03:51:00	12.3
2018-11-02 03:56:00	12.1
2018-11-02 04:01:00	12.8
2018-11-02 04:06:00	12.0
2018-11-02 04:11:00	12.2
2018-11-02 04:16:00	12.5
2018-11-02 04:21:00	12.2
2018-11-02 04:26:00	12.0
2018-11-02 04:31:00	12.3
2018-11-02 04:36:00	11.9
2018-11-02 04:41:00	12.0
2018-11-02 04:46:00	12.1
2018-11-02 04:51:00	12.1
2018-11-02 04:56:00	12.4
2018-11-02 05:01:00	12.6
2018-11-02 05:06:00	12.1
2018-11-02 05:11:00	11.9
2018-11-02 05:16:00	12.2
2018-11-02 05:21:00	12.5
2018-11-02 05:26:00	11.9
2018-11-02 05:31:00	12.0
2018-11-02 05:36:00	11.9
2018-11-02 05:41:00	12.3
2018-11-02 05:46:00	11.9
2018-11-02 05:51:00	11.9
2018-11-02 05:56:00	11.8
2018-11-02 06:01:00	11.8
2018-11-02 06:06:00	12.0
2018-11-02 06:11:00	11.7
2018-11-02 06:16:00	11.8
2018-11-02 06:21:00	11.7
2018-11-02 06:26:00	11.7
2018-11-02 06:31:00	12.3
2018-11-02 06:36:00	13.3
2018-11-02 06:41:00	12.8
2018-11-02 06:46:00	12.6
2018-11-02 06:51:00	12.5
2018-11-02 06:56:00	12.2
2018-11-02 07:01:00	12.2
2018-11-02 07:06:00	12.1
2018-11-02 07:11:00	12.0
2018-11-02 07:16:00	12.1
2018-11-02 07:21:00	12.0
2018-11-02 07:26:00	11.9
2018-11-02 07:31:00	11.7
2018-11-02 07:36:00	11.7
2018-11-02 07:41:00	11.9
2018-11-02 07:46:00	11.8
2018-11-02 07:51:00	11.6
2018-11-02 07:56:00	11.7
2018-11-02 08:01:00	11.5
2018-11-02 08:06:00	11.8
2018-11-02 08:11:00	11.8
2018-11-02 08:16:00	11.9
2018-11-02 08:21:00	12.1
2018-11-02 08:26:00	12.0
2018-11-02 08:31:00	12.1
2018-11-02 08:36:00	12.3
2018-11-02 08:41:00	12.1
2018-11-02 08:46:00	12.2
2018-11-02 08:51:00	14.0
2018-11-02 08:56:00	15.6
2018-11-02 09:01:00	16.1
2018-11-02 09:06:00	16.7
2018-11-02 09:11:00	17.0
2018-11-02 09:16:00	16.2
2018-11-02 09:21:00	15.7
2018-11-02 09:26:00	15.2
2018-11-02 09:31:00	15.2
2018-11-02 09:36:00	15.4
2018-11-02 09:41:00	14.7
2018-11-02 09:46:00	14.4
2018-11-02 09:51:00	13.9
2018-11-02 09:56:00	13.5
2018-11-02 10:01:00	15.8
2018-11-02 10:06:00	17.1
2018-11-02 10:11:00	18.8
2018-11-02 10:16:00	20.6
2018-11-02 10:21:00	20.8
2018-11-02 10:26:00	20.0
2018-11-02 10:31:00	18.4
2018-11-02 10:36:00	16.6
2018-11-02 10:41:00	15.5
2018-11-02 10:46:00	15.2
2018-11-02 10:51:00	13.8
2018-11-02 10:56:00	13.4
2018-11-02 11:01:00	13.3
2018-11-02 11:06:00	13.6
2018-11-02 11:11:00	14.1
2018-11-02 11:16:00	14.7
2018-11-02 11:21:00	14.4
2018-11-02 11:26:00	13.9
2018-11-02 11:31:00	14.2
2018-11-02 11:36:00	13.7
2018-11-02 11:41:00	13.4
2018-11-02 11:51:00	13.3
2018-11-02 11:56:00	13.0
2018-11-02 12:01:00	12.6
2018-11-02 12:06:00	12.6
2018-11-02 12:11:00	12.6
2018-11-02 12:16:00	12.6
2018-11-02 12:21:00	12.7
2018-11-02 12:26:00	12.7
2018-11-02 12:31:00	12.7
2018-11-02 12:36:00	12.6
2018-11-02 12:41:00	13.0
2018-11-02 12:46:00	12.7
2018-11-02 12:51:00	13.0
2018-11-02 12:56:00	12.5
2018-11-02 13:01:00	12.4
2018-11-02 13:06:00	12.4
2018-11-02 13:11:00	12.6
2018-11-02 13:16:00	12.3
2018-11-02 13:21:00	12.1
2018-11-02 13:26:00	12.5
2018-11-02 13:31:00	12.2
2018-11-02 13:36:00	12.8
2018-11-02 13:41:00	13.0
2018-11-02 13:46:00	12.9
2018-11-02 13:51:00	12.8
2018-11-02 13:56:00	12.8
2018-11-02 14:01:00	13.1
2018-11-02 14:06:00	13.4
2018-11-02 14:11:00	12.6
2018-11-02 14:16:00	12.4
2018-11-02 14:21:00	12.2
2018-11-02 14:26:00	12.2
2018-11-02 14:31:00	12.2
2018-11-02 14:36:00	12.1
2018-11-02 14:41:00	12.2
2018-11-02 14:46:00	12.5
2018-11-02 14:51:00	12.3
2018-11-02 14:56:00	11.9
2018-11-02 15:01:00	11.9
2018-11-02 15:06:00	12.0
2018-11-02 15:11:00	12.2
2018-11-02 15:16:00	12.0
2018-11-02 15:21:00	12.3
2018-11-02 15:26:00	12.7
2018-11-02 15:31:00	12.7
2018-11-02 15:36:00	12.6
2018-11-02 15:41:00	12.3
2018-11-02 15:46:00	12.4
2018-11-02 15:51:00	12.2
2018-11-02 15:56:00	12.1
2018-11-02 16:01:00	12.1
2018-11-02 16:06:00	12.5
2018-11-02 16:11:00	13.2
2018-11-02 16:16:00	12.8
2018-11-02 16:21:00	13.0
2018-11-02 16:26:00	12.6
2018-11-02 16:31:00	12.2
2018-11-02 16:36:00	12.1
2018-11-02 16:41:00	12.0
2018-11-02 16:46:00	12.0
2018-11-02 16:51:00	12.1
2018-11-02 16:56:00	12.2
2018-11-02 17:01:00	12.4
2018-11-02 17:06:00	13.0
2018-11-02 17:11:00	13.4
2018-11-02 17:16:00	13.0
2018-11-02 17:21:00	13.0
2018-11-02 17:26:00	12.7
2018-11-02 17:31:00	12.3
2018-11-02 17:36:00	12.1
2018-11-02 17:41:00	12.2
2018-11-02 17:46:00	12.0
2018-11-02 17:51:00	12.3
2018-11-02 17:56:00	12.2
2018-11-02 18:01:00	12.2
2018-11-02 18:06:00	12.2
2018-11-02 18:11:00	12.2
2018-11-02 18:16:00	12.5
2018-11-02 18:21:00	12.6
2018-11-02 18:26:00	12.2
2018-11-02 18:31:00	11.8
2018-11-02 18:36:00	11.9
2018-11-02 18:41:00	11.9
2018-11-02 18:46:00	12.2
2018-11-02 18:51:00	12.1
2018-11-02 18:56:00	11.9
2018-11-02 19:01:00	14.4
2018-11-02 19:06:00	12.4
2018-11-02 19:11:00	12.7
2018-11-02 19:16:00	11.9
2018-11-02 19:21:00	12.2
2018-11-02 19:26:00	12.0
2018-11-02 19:31:00	12.0
2018-11-02 19:36:00	12.5
2018-11-02 19:41:00	11.9
2018-11-02 19:46:00	12.0
2018-11-02 19:51:00	12.3
2018-11-02 19:56:00	12.0
2018-11-02 20:01:00	12.1
2018-11-02 20:06:00	11.8
2018-11-02 20:11:00	12.1
2018-11-02 20:16:00	11.9
2018-11-02 20:21:00	12.0
2018-11-02 20:26:00	11.9
2018-11-02 20:31:00	11.9
2018-11-02 20:36:00	11.9
2018-11-02 20:41:00	11.8
2018-11-02 20:46:00	11.7
2018-11-02 20:51:00	11.9
2018-11-02 20:56:00	11.9
2018-11-02 21:01:00	11.7
2018-11-02 21:06:00	12.0
2018-11-02 21:11:00	12.1
2018-11-02 21:16:00	12.2
2018-11-02 21:21:00	12.0
2018-11-02 21:26:00	11.9
2018-11-02 21:31:00	11.7
2018-11-02 21:36:00	11.7
2018-11-02 21:41:00	12.3
2018-11-02 21:46:00	11.8
2018-11-02 21:51:00	11.8
2018-11-02 21:56:00	11.9
2018-11-02 22:01:00	12.0
2018-11-02 22:06:00	11.7
2018-11-02 22:11:00	12.0
2018-11-02 22:16:00	11.9
2018-11-02 22:21:00	11.8
2018-11-02 22:26:00	11.7
2018-11-02 22:31:00	12.0
2018-11-02 22:36:00	11.6
2018-11-02 22:41:00	11.8
2018-11-02 22:46:00	11.7
2018-11-02 22:51:00	11.6
2018-11-02 22:56:00	11.7
2018-11-02 23:01:00	11.7
2018-11-02 23:06:00	11.8
2018-11-02 23:11:00	12.0
2018-11-02 23:16:00	11.9
2018-11-02 23:21:00	11.8
2018-11-02 23:26:00	11.7
2018-11-02 23:31:00	11.6
2018-11-02 23:36:00	11.7
2018-11-02 23:41:00	12.4
2018-11-02 23:46:00	12.6
2018-11-02 23:51:00	12.0
2018-11-02 23:56:00	12.1
2018-11-03 00:01:00	12.3
2018-11-03 00:06:00	12.0
2018-11-03 00:11:00	12.0
2018-11-03 00:16:00	12.5
2018-11-03 00:21:00	12.2
2018-11-03 00:26:00	12.0
2018-11-03 00:31:00	12.0
2018-11-03 00:36:00	11.8
2018-11-03 00:41:00	12.0
2018-11-03 00:46:00	11.7
2018-11-03 00:51:00	11.7
2018-11-03 00:56:00	11.7
2018-11-03 01:01:00	11.7
2018-11-03 01:06:00	11.9
2018-11-03 01:11:00	11.9
2018-11-03 01:16:00	11.8
2018-11-03 01:21:00	11.7
2018-11-03 01:26:00	11.8
2018-11-03 01:31:00	11.7
2018-11-03 01:36:00	11.5
2018-11-03 01:41:00	11.7
2018-11-03 01:46:00	11.5
2018-11-03 01:51:00	11.7
2018-11-03 01:56:00	11.6
2018-11-03 02:01:00	11.5
2018-11-03 02:06:00	11.6
2018-11-03 02:11:00	11.6
2018-11-03 02:16:00	11.7
2018-11-03 02:21:00	11.5
2018-11-03 02:26:00	11.7
2018-11-03 02:31:00	11.5
2018-11-03 02:36:00	11.6
2018-11-03 02:41:00	11.5
2018-11-03 02:46:00	11.7
2018-11-03 02:51:00	11.5
2018-11-03 02:56:00	11.9
2018-11-03 03:01:00	11.8
2018-11-03 03:06:00	11.9
2018-11-03 03:11:00	11.7
2018-11-03 03:16:00	12.0
2018-11-03 03:21:00	11.7
2018-11-03 03:26:00	11.4
2018-11-03 03:31:00	11.5
2018-11-03 03:36:00	11.6
2018-11-03 03:41:00	12.2
2018-11-03 03:46:00	12.0
2018-11-03 03:51:00	12.2
2018-11-03 03:56:00	11.8
2018-11-03 04:01:00	12.0
2018-11-03 04:06:00	11.5
2018-11-03 04:11:00	11.7
2018-11-03 04:16:00	11.7
2018-11-03 04:21:00	11.5
2018-11-03 04:26:00	11.3
2018-11-03 04:31:00	11.4
2018-11-03 04:36:00	11.5
2018-11-03 04:41:00	11.5
2018-11-03 04:46:00	11.5
2018-11-03 04:51:00	11.5
2018-11-03 04:56:00	11.5
2018-11-03 05:01:00	11.4
2018-11-03 05:06:00	11.2
2018-11-03 05:11:00	11.2
2018-11-03 05:16:00	11.5
2018-11-03 05:21:00	12.0
2018-11-03 05:26:00	11.7
2018-11-03 05:31:00	11.5
2018-11-03 05:36:00	11.7
2018-11-03 05:41:00	11.8
2018-11-03 05:46:00	11.5
2018-11-03 05:51:00	11.5
2018-11-03 05:56:00	11.4
2018-11-03 06:01:00	11.4
2018-11-03 06:06:00	11.3
2018-11-03 06:11:00	11.5
2018-11-03 06:16:00	11.4
2018-11-03 06:21:00	11.3
2018-11-03 06:26:00	11.3
2018-11-03 06:31:00	11.1
2018-11-03 06:36:00	11.3
2018-11-03 06:41:00	11.3
2018-11-03 06:46:00	11.2
2018-11-03 06:51:00	11.3
2018-11-03 06:56:00	11.1
2018-11-03 07:01:00	11.4
2018-11-03 07:06:00	11.2
2018-11-03 07:11:00	11.2
2018-11-03 07:16:00	11.2
2018-11-03 07:21:00	11.1
2018-11-03 07:26:00	11.4
2018-11-03 07:31:00	11.2
2018-11-03 07:36:00	11.1
2018-11-03 07:41:00	11.1
2018-11-03 07:46:00	11.4
2018-11-03 07:51:00	12.8
2018-11-03 07:56:00	16.6
2018-11-03 08:01:00	20.1
2018-11-03 08:06:00	21.9
2018-11-03 08:11:00	21.0
2018-11-03 08:16:00	18.9
2018-11-03 08:21:00	16.9
2018-11-03 08:26:00	15.3
2018-11-03 08:31:00	14.3
2018-11-03 08:36:00	13.4
2018-11-03 08:41:00	12.8
2018-11-03 08:46:00	12.6
2018-11-03 08:51:00	12.6
2018-11-03 08:56:00	12.9
2018-11-03 09:01:00	13.9
2018-11-03 09:06:00	15.9
2018-11-03 09:11:00	17.0
2018-11-03 09:16:00	16.9
2018-11-03 09:21:00	16.2
2018-11-03 09:26:00	15.1
2018-11-03 09:31:00	14.5
2018-11-03 09:36:00	13.9
2018-11-03 09:41:00	13.7
2018-11-03 09:46:00	14.1
2018-11-03 09:51:00	15.1
2018-11-03 09:56:00	15.4
2018-11-03 10:01:00	15.8
2018-11-03 10:06:00	15.3
2018-11-03 10:11:00	14.7
2018-11-03 10:16:00	14.0
2018-11-03 10:21:00	13.4
2018-11-03 10:26:00	13.1
2018-11-03 10:31:00	12.9
2018-11-03 10:36:00	12.4
2018-11-03 10:41:00	12.2
2018-11-03 10:46:00	12.3
2018-11-03 10:51:00	12.2
2018-11-03 10:56:00	12.0
2018-11-03 11:01:00	11.9
2018-11-03 11:06:00	12.1
2018-11-03 11:11:00	12.1
2018-11-03 11:16:00	12.0
2018-11-03 11:21:00	12.5
2018-11-03 11:26:00	13.6
2018-11-03 11:31:00	14.2
2018-11-03 11:36:00	14.1
2018-11-03 11:41:00	13.6
2018-11-03 11:46:00	13.1
2018-11-03 11:51:00	12.6
2018-11-03 11:56:00	12.3
2018-11-03 12:01:00	12.2
2018-11-03 12:06:00	12.2
2018-11-03 12:11:00	11.9
2018-11-03 12:16:00	12.2
2018-11-03 12:21:00	11.9
2018-11-03 12:26:00	11.8
2018-11-03 12:31:00	11.7
2018-11-03 12:36:00	11.9
2018-11-03 12:41:00	11.9
2018-11-03 12:46:00	12.0
2018-11-03 12:51:00	12.0
2018-11-03 12:56:00	12.1
2018-11-03 13:01:00	11.9
2018-11-03 13:06:00	12.0
2018-11-03 13:11:00	11.9
2018-11-03 13:16:00	12.1
2018-11-03 13:21:00	11.8
2018-11-03 13:26:00	11.9
2018-11-03 13:31:00	12.3
2018-11-03 13:36:00	12.8
2018-11-03 13:41:00	13.1
2018-11-03 13:46:00	12.7
2018-11-03 13:51:00	12.5
2018-11-03 13:56:00	12.4
2018-11-03 14:01:00	12.4
2018-11-03 14:06:00	12.5
2018-11-03 14:11:00	12.3
2018-11-03 14:16:00	12.2
2018-11-03 14:21:00	12.0
2018-11-03 14:26:00	12.0
2018-11-03 14:31:00	11.7
2018-11-03 14:36:00	11.7
2018-11-03 14:41:00	11.5
2018-11-03 14:46:00	11.6
2018-11-03 14:51:00	11.7
2018-11-03 14:56:00	11.6
2018-11-03 15:01:00	11.5
2018-11-03 15:06:00	11.8
2018-11-03 15:11:00	11.9
2018-11-03 15:16:00	11.8
2018-11-03 15:21:00	11.9
2018-11-03 15:26:00	12.0
2018-11-03 15:31:00	12.0
2018-11-03 15:36:00	11.7
2018-11-03 15:41:00	11.7
2018-11-03 15:46:00	11.7
2018-11-03 15:51:00	11.7
2018-11-03 15:56:00	11.7
2018-11-03 16:01:00	11.8
2018-11-03 16:06:00	11.7
2018-11-03 16:11:00	11.6
2018-11-03 16:16:00	12.0
2018-11-03 16:21:00	12.0
2018-11-03 16:26:00	12.2
2018-11-03 16:31:00	12.1
2018-11-03 16:36:00	12.1
2018-11-03 16:41:00	12.2
2018-11-03 16:46:00	12.0
2018-11-03 16:51:00	12.3
2018-11-03 16:56:00	12.6
2018-11-03 17:01:00	12.3
2018-11-03 17:06:00	12.2
2018-11-03 17:11:00	12.2
2018-11-03 17:16:00	12.0
2018-11-03 17:21:00	12.0
2018-11-03 17:26:00	11.9
2018-11-03 17:31:00	11.8
2018-11-03 17:36:00	11.9
2018-11-03 17:41:00	11.5
2018-11-03 17:46:00	11.4
2018-11-03 17:51:00	11.5
2018-11-03 17:56:00	12.0
2018-11-03 18:01:00	11.5
2018-11-03 18:06:00	11.6
2018-11-03 18:11:00	11.5
2018-11-03 18:16:00	11.5
2018-11-03 18:21:00	11.6
2018-11-03 18:26:00	11.5
2018-11-03 18:31:00	11.5
2018-11-03 18:36:00	11.5
2018-11-03 18:41:00	11.5
2018-11-03 18:46:00	11.4
2018-11-03 18:51:00	11.4
2018-11-03 18:56:00	11.4
2018-11-03 19:01:00	11.4
2018-11-03 19:06:00	11.5
2018-11-03 19:11:00	11.5
2018-11-03 19:16:00	11.3
2018-11-03 19:21:00	11.4
2018-11-03 19:26:00	11.4
2018-11-03 19:31:00	11.2
2018-11-03 19:36:00	11.4
2018-11-03 19:41:00	12.3
2018-11-03 19:46:00	11.5
2018-11-03 19:51:00	11.5
2018-11-03 19:56:00	11.2
2018-11-03 20:01:00	11.4
2018-11-03 20:06:00	11.4
2018-11-03 20:11:00	11.4
2018-11-03 20:16:00	11.3
2018-11-03 20:21:00	11.5
2018-11-03 20:26:00	11.4
2018-11-03 20:31:00	11.4
2018-11-03 20:36:00	11.4
2018-11-03 20:41:00	11.5
2018-11-03 20:46:00	11.3
2018-11-03 20:51:00	11.4
2018-11-03 20:56:00	11.3
2018-11-03 21:01:00	11.3
2018-11-03 21:06:00	11.3
2018-11-03 21:11:00	11.3
2018-11-03 21:16:00	11.5
2018-11-03 21:21:00	11.7
2018-11-03 21:26:00	11.3
2018-11-03 21:31:00	11.7
2018-11-03 21:36:00	11.4
2018-11-03 21:41:00	11.1
2018-11-03 21:46:00	11.2
2018-11-03 21:51:00	11.3
2018-11-03 21:56:00	11.2
2018-11-03 22:01:00	11.3
2018-11-03 22:06:00	11.2
2018-11-03 22:11:00	11.2
2018-11-03 22:16:00	11.2
2018-11-03 22:21:00	11.2
2018-11-03 22:26:00	11.2
2018-11-03 22:31:00	11.1
2018-11-03 22:36:00	11.2
2018-11-03 22:41:00	11.0
2018-11-03 22:46:00	11.0
2018-11-03 22:51:00	11.7
2018-11-03 22:56:00	11.1
2018-11-03 23:01:00	11.2
2018-11-03 23:06:00	10.9
2018-11-03 23:11:00	11.1
2018-11-03 23:16:00	11.2
2018-11-03 23:21:00	11.1
2018-11-03 23:26:00	11.0
2018-11-03 23:31:00	11.4
2018-11-03 23:36:00	12.3
2018-11-03 23:41:00	11.2
2018-11-03 23:46:00	11.1
2018-11-03 23:51:00	11.2
2018-11-03 23:56:00	11.0
2018-11-04 00:01:00	11.0
2018-11-04 00:06:00	10.9
2018-11-04 00:11:00	10.9
2018-11-04 00:16:00	11.1
2018-11-04 00:21:00	11.5
2018-11-04 00:26:00	11.9
2018-11-04 00:31:00	11.2
2018-11-04 00:36:00	11.1
2018-11-04 00:41:00	11.1
2018-11-04 00:46:00	11.1
2018-11-04 00:51:00	11.1
2018-11-04 00:56:00	11.1
2018-11-04 01:01:00	11.1
2018-11-04 01:06:00	11.0
2018-11-04 01:11:00	11.2
2018-11-04 01:16:00	11.2
2018-11-04 01:21:00	11.1
2018-11-04 01:26:00	11.2
2018-11-04 01:31:00	11.2
2018-11-04 01:36:00	12.8
2018-11-04 01:41:00	12.2
2018-11-04 01:46:00	12.0
2018-11-04 01:51:00	11.6
2018-11-04 01:56:00	11.5
2018-11-04 02:01:00	11.4
2018-11-04 02:06:00	11.4
2018-11-04 02:11:00	11.2
2018-11-04 02:16:00	11.4
2018-11-04 02:21:00	11.2
2018-11-04 02:26:00	11.4
2018-11-04 02:31:00	11.6
2018-11-04 02:36:00	11.5
2018-11-04 02:41:00	11.6
2018-11-04 02:46:00	11.8
2018-11-04 02:51:00	11.6
2018-11-04 02:56:00	11.4
2018-11-04 03:01:00	11.5
2018-11-04 03:06:00	11.3
2018-11-04 03:11:00	11.2
2018-11-04 03:16:00	11.2
2018-11-04 03:21:00	11.2
2018-11-04 03:26:00	11.4
2018-11-04 03:31:00	11.3
2018-11-04 03:36:00	11.2
2018-11-04 03:41:00	11.6
2018-11-04 03:46:00	12.2
2018-11-04 03:51:00	11.2
2018-11-04 03:56:00	11.2
2018-11-04 04:01:00	11.2
2018-11-04 04:06:00	11.2
2018-11-04 04:11:00	11.2
2018-11-04 04:16:00	11.2
2018-11-04 04:21:00	11.2
2018-11-04 04:26:00	11.1
2018-11-04 04:31:00	11.1
2018-11-04 04:36:00	11.1
2018-11-04 04:41:00	11.0
2018-11-04 04:46:00	11.0
2018-11-04 04:51:00	10.9
2018-11-04 04:56:00	11.1
2018-11-04 05:01:00	11.0
2018-11-04 05:06:00	10.9
2018-11-04 05:11:00	10.9
2018-11-04 05:16:00	10.9
2018-11-04 05:21:00	11.1
2018-11-04 05:26:00	11.0
2018-11-04 05:31:00	10.9
2018-11-04 05:36:00	11.1
2018-11-04 05:41:00	10.9
2018-11-04 05:46:00	10.9
2018-11-04 05:51:00	10.9
2018-11-04 05:56:00	11.0
2018-11-04 06:01:00	11.1
2018-11-04 06:06:00	11.1
2018-11-04 06:11:00	10.9
2018-11-04 06:16:00	10.9
2018-11-04 06:21:00	11.0
2018-11-04 06:26:00	10.9
2018-11-04 06:31:00	10.8
2018-11-04 06:36:00	10.9
2018-11-04 06:41:00	11.0
2018-11-04 06:46:00	11.0
2018-11-04 06:51:00	10.9
2018-11-04 06:56:00	10.9
2018-11-04 07:01:00	10.9
2018-11-04 07:06:00	10.9
2018-11-04 07:11:00	11.0
2018-11-04 07:16:00	10.9
2018-11-04 07:21:00	11.0
2018-11-04 07:26:00	10.9
2018-11-04 07:31:00	11.1
2018-11-04 07:36:00	10.9
2018-11-04 07:41:00	10.9
2018-11-04 07:46:00	11.0
2018-11-04 07:51:00	10.9
2018-11-04 07:56:00	10.9
2018-11-04 08:01:00	11.0
2018-11-04 08:06:00	10.9
2018-11-04 08:11:00	10.9
2018-11-04 08:16:00	10.9
2018-11-04 08:21:00	10.9
2018-11-04 08:26:00	10.8
2018-11-04 08:31:00	10.9
2018-11-04 08:36:00	10.9
2018-11-04 08:41:00	10.9
2018-11-04 08:46:00	10.8
2018-11-04 08:51:00	10.9
2018-11-04 08:56:00	10.9
2018-11-04 09:01:00	10.8
2018-11-04 09:06:00	10.8
2018-11-04 09:11:00	10.9
2018-11-04 09:16:00	11.0
2018-11-04 09:21:00	10.9
2018-11-04 09:26:00	10.9
2018-11-04 09:31:00	10.9
2018-11-04 09:36:00	10.9
2018-11-04 09:41:00	10.9
2018-11-04 09:46:00	10.9
2018-11-04 09:51:00	10.9
2018-11-04 09:56:00	10.9
2018-11-04 10:01:00	10.9
2018-11-04 10:06:00	10.9
2018-11-04 10:11:00	10.9
2018-11-04 10:16:00	10.9
2018-11-04 10:21:00	11.0
2018-11-04 10:26:00	11.1
2018-11-04 10:31:00	10.9
2018-11-04 10:36:00	10.9
2018-11-04 10:41:00	10.9
2018-11-04 10:46:00	11.1
2018-11-04 10:51:00	11.1
2018-11-04 10:56:00	11.0
2018-11-04 11:01:00	10.9
2018-11-04 11:06:00	10.9
2018-11-04 11:11:00	11.1
2018-11-04 11:16:00	10.9
2018-11-04 11:21:00	11.0
2018-11-04 11:26:00	11.0
2018-11-04 11:31:00	11.0
2018-11-04 11:36:00	11.0
2018-11-04 11:41:00	11.0
2018-11-04 11:46:00	11.4
2018-11-04 11:51:00	11.1
2018-11-04 11:56:00	11.2
2018-11-04 12:01:00	11.1
2018-11-04 12:06:00	11.1
2018-11-04 12:11:00	11.1
2018-11-04 12:16:00	10.9
2018-11-04 12:21:00	11.0
2018-11-04 12:26:00	11.0
2018-11-04 12:31:00	11.2
2018-11-04 12:36:00	11.9
2018-11-04 12:41:00	12.3
2018-11-04 12:46:00	12.7
2018-11-04 12:51:00	12.9
2018-11-04 12:56:00	12.8
2018-11-04 13:01:00	12.7
2018-11-04 13:06:00	13.0
2018-11-04 13:11:00	13.6
2018-11-04 13:16:00	14.0
2018-11-04 13:21:00	13.8
2018-11-04 13:26:00	13.4
2018-11-04 13:31:00	13.0
2018-11-04 13:36:00	12.6
2018-11-04 13:41:00	12.5
2018-11-04 13:46:00	12.4
2018-11-04 13:51:00	12.5
2018-11-04 13:56:00	12.5
2018-11-04 14:01:00	12.5
2018-11-04 14:06:00	12.4
2018-11-04 14:11:00	12.3
2018-11-04 14:16:00	12.3
2018-11-04 14:21:00	12.0
2018-11-04 14:26:00	12.0
2018-11-04 14:31:00	12.0
2018-11-04 14:36:00	11.8
2018-11-04 14:41:00	11.9
2018-11-04 14:46:00	11.7
2018-11-04 14:51:00	11.9
2018-11-04 14:56:00	12.0
2018-11-04 15:01:00	12.3
2018-11-04 15:06:00	12.5
2018-11-04 15:11:00	12.5
2018-11-04 15:16:00	12.3
2018-11-04 15:21:00	12.2
2018-11-04 15:26:00	12.1
2018-11-04 15:31:00	12.1
2018-11-04 15:36:00	12.6
2018-11-04 15:41:00	13.0
2018-11-04 15:46:00	13.3
2018-11-04 15:51:00	13.4
2018-11-04 15:56:00	13.1
2018-11-04 16:01:00	13.0
2018-11-04 16:06:00	12.9
2018-11-04 16:11:00	12.8
2018-11-04 16:16:00	12.6
2018-11-04 16:21:00	12.6
2018-11-04 16:26:00	12.3
2018-11-04 16:31:00	12.2
2018-11-04 16:36:00	12.2
2018-11-04 16:41:00	12.0
2018-11-04 16:46:00	11.9
2018-11-04 16:51:00	11.7
2018-11-04 16:56:00	11.5
2018-11-04 17:01:00	11.5
2018-11-04 17:06:00	11.5
2018-11-04 17:11:00	11.4
2018-11-04 17:16:00	11.3
2018-11-04 17:21:00	11.5
2018-11-04 17:26:00	11.3
2018-11-04 17:31:00	11.1
2018-11-04 17:36:00	11.2
2018-11-04 17:41:00	11.2
2018-11-04 17:46:00	11.2
2018-11-04 17:51:00	11.7
2018-11-04 17:56:00	12.2
2018-11-04 18:01:00	12.3
2018-11-04 18:06:00	11.9
2018-11-04 18:11:00	11.7
2018-11-04 18:16:00	12.0
2018-11-04 18:21:00	11.7
2018-11-04 18:26:00	11.8
2018-11-04 18:31:00	11.4
2018-11-04 18:36:00	11.2
2018-11-04 18:41:00	11.4
2018-11-04 18:46:00	11.4
2018-11-04 18:51:00	11.2
2018-11-04 18:56:00	11.2
2018-11-04 19:01:00	11.4
2018-11-04 19:06:00	11.2
2018-11-04 19:11:00	11.1
2018-11-04 19:16:00	11.5
2018-11-04 19:21:00	11.1
2018-11-04 19:26:00	11.0
2018-11-04 19:31:00	11.2
2018-11-04 19:36:00	11.2
2018-11-04 19:41:00	11.0
2018-11-04 19:46:00	11.1
2018-11-04 19:51:00	11.1
2018-11-04 19:56:00	11.0
2018-11-04 20:01:00	11.2
2018-11-04 20:06:00	11.1
2018-11-04 20:11:00	11.1
2018-11-04 20:16:00	11.2
2018-11-04 20:21:00	11.7
2018-11-04 20:26:00	11.1
2018-11-04 20:31:00	11.4
2018-11-04 20:36:00	11.6
2018-11-04 20:41:00	11.3
2018-11-04 20:46:00	11.1
2018-11-04 20:51:00	11.1
2018-11-04 20:56:00	11.2
2018-11-04 21:01:00	11.7
2018-11-04 21:06:00	11.5
2018-11-04 21:11:00	11.4
2018-11-04 21:16:00	11.2
2018-11-04 21:21:00	11.6
2018-11-04 21:26:00	11.4
2018-11-04 21:31:00	11.4
2018-11-04 21:36:00	11.2
2018-11-04 21:41:00	11.4
2018-11-04 21:46:00	11.4
2018-11-04 21:51:00	11.4
2018-11-04 21:56:00	11.4
2018-11-04 22:01:00	11.4
2018-11-04 22:06:00	11.5
2018-11-04 22:11:00	11.5
2018-11-04 22:16:00	11.9
2018-11-04 22:21:00	11.7
2018-11-04 22:26:00	11.7
2018-11-04 22:31:00	11.5
2018-11-04 22:36:00	11.5
2018-11-04 22:41:00	11.5
2018-11-04 22:46:00	11.7
2018-11-04 22:51:00	11.3
2018-11-04 22:56:00	11.4
2018-11-04 23:01:00	11.2
2018-11-04 23:06:00	11.2
2018-11-04 23:11:00	11.3
2018-11-04 23:16:00	11.2
2018-11-04 23:21:00	11.3
2018-11-04 23:26:00	11.4
2018-11-04 23:31:00	11.4
2018-11-04 23:36:00	11.5
2018-11-04 23:41:00	11.3
2018-11-04 23:46:00	11.5
2018-11-04 23:51:00	11.4
2018-11-04 23:56:00	11.2
2018-11-05 00:01:00	11.2
2018-11-05 00:06:00	11.2
2018-11-05 00:11:00	11.3
2018-11-05 00:16:00	11.3
2018-11-05 00:21:00	11.4
2018-11-05 00:26:00	11.3
2018-11-05 00:31:00	11.7
2018-11-05 00:36:00	11.3
2018-11-05 00:41:00	11.2
2018-11-05 00:46:00	11.5
2018-11-05 00:51:00	12.2
2018-11-05 00:56:00	11.8
2018-11-05 01:01:00	13.9
2018-11-05 01:06:00	11.4
2018-11-05 01:11:00	11.2
2018-11-05 01:16:00	11.2
2018-11-05 01:21:00	11.2
2018-11-05 01:26:00	11.3
2018-11-05 01:31:00	11.3
2018-11-05 01:36:00	11.2
2018-11-05 01:41:00	11.4
2018-11-05 01:46:00	11.3
2018-11-05 01:51:00	11.3
2018-11-05 01:56:00	11.4
2018-11-05 02:01:00	11.5
2018-11-05 02:06:00	11.2
2018-11-05 02:11:00	11.1
2018-11-05 02:16:00	11.6
2018-11-05 02:21:00	11.5
2018-11-05 02:26:00	11.3
2018-11-05 02:31:00	11.4
2018-11-05 02:36:00	11.1
2018-11-05 02:41:00	11.2
2018-11-05 02:46:00	11.4
2018-11-05 02:51:00	11.2
2018-11-05 02:56:00	11.2
2018-11-05 03:01:00	11.3
2018-11-05 03:06:00	11.4
2018-11-05 03:11:00	11.1
2018-11-05 03:16:00	11.2
2018-11-05 03:21:00	11.3
2018-11-05 03:26:00	11.1
2018-11-05 03:31:00	11.3
2018-11-05 03:36:00	11.3
2018-11-05 03:41:00	11.2
2018-11-05 03:46:00	11.3
2018-11-05 03:51:00	11.2
2018-11-05 03:56:00	11.2
2018-11-05 04:01:00	11.2
2018-11-05 04:06:00	11.2
2018-11-05 04:11:00	11.2
2018-11-05 04:16:00	11.4
2018-11-05 04:21:00	11.4
2018-11-05 04:26:00	11.2
2018-11-05 04:31:00	11.2
2018-11-05 04:36:00	11.2
2018-11-05 04:41:00	11.4
2018-11-05 04:46:00	11.2
2018-11-05 04:51:00	11.2
2018-11-05 04:56:00	11.4
2018-11-05 05:01:00	12.8
2018-11-05 05:06:00	12.2
2018-11-05 05:11:00	11.9
2018-11-05 05:16:00	11.8
2018-11-05 05:21:00	11.5
2018-11-05 05:26:00	11.9
2018-11-05 05:31:00	11.6
2018-11-05 05:36:00	11.6
2018-11-05 05:41:00	11.5
2018-11-05 05:46:00	11.5
2018-11-05 05:51:00	11.5
2018-11-05 05:56:00	11.4
2018-11-05 06:01:00	11.4
2018-11-05 06:06:00	11.5
2018-11-05 06:11:00	11.3
2018-11-05 06:16:00	11.4
2018-11-05 06:21:00	11.3
2018-11-05 06:26:00	11.3
2018-11-05 06:31:00	11.4
2018-11-05 06:36:00	11.4
2018-11-05 06:41:00	11.2
2018-11-05 06:46:00	11.3
2018-11-05 06:51:00	11.4
2018-11-05 06:56:00	11.4
2018-11-05 07:01:00	11.2
2018-11-05 07:06:00	11.2
2018-11-05 07:11:00	11.3
2018-11-05 07:16:00	11.1
2018-11-05 07:21:00	11.2
2018-11-05 07:26:00	11.2
2018-11-05 07:31:00	11.2
2018-11-05 07:36:00	11.1
2018-11-05 07:41:00	11.2
2018-11-05 07:46:00	11.1
2018-11-05 07:51:00	11.1
2018-11-05 07:56:00	11.2
2018-11-05 08:01:00	11.1
2018-11-05 08:06:00	11.2
2018-11-05 08:11:00	11.1
2018-11-05 08:16:00	11.1
2018-11-05 08:21:00	11.1
2018-11-05 08:26:00	11.1
2018-11-05 08:31:00	11.1
2018-11-05 08:36:00	11.1
2018-11-05 08:41:00	11.2
2018-11-05 08:46:00	11.1
2018-11-05 08:51:00	11.1
2018-11-05 08:56:00	11.2
2018-11-05 09:01:00	11.2
2018-11-05 09:06:00	11.5
2018-11-05 09:11:00	11.5
2018-11-05 09:16:00	11.5
2018-11-05 09:21:00	11.7
2018-11-05 09:26:00	11.7
2018-11-05 09:31:00	11.7
2018-11-05 09:36:00	11.7
2018-11-05 09:41:00	11.5
2018-11-05 09:46:00	11.5
2018-11-05 09:51:00	11.6
2018-11-05 09:56:00	11.6
2018-11-05 10:01:00	11.7
2018-11-05 10:06:00	11.8
2018-11-05 10:11:00	11.9
2018-11-05 10:16:00	11.9
2018-11-05 10:21:00	12.0
2018-11-05 10:26:00	11.9
2018-11-05 10:31:00	11.8
2018-11-05 10:36:00	12.0
2018-11-05 10:41:00	11.7
2018-11-05 10:46:00	11.8
2018-11-05 10:51:00	11.7
2018-11-05 10:56:00	11.6
2018-11-05 11:01:00	11.7
2018-11-05 11:06:00	11.5
2018-11-05 11:11:00	11.6
2018-11-05 11:16:00	11.6
2018-11-05 11:21:00	11.6
2018-11-05 11:26:00	11.7
2018-11-05 11:31:00	11.7
2018-11-05 11:36:00	11.9
2018-11-05 11:41:00	11.9
2018-11-05 11:46:00	12.0
2018-11-05 11:51:00	11.9
2018-11-05 11:56:00	12.0
2018-11-05 12:01:00	12.1
2018-11-05 12:06:00	12.0
2018-11-05 12:11:00	12.0
2018-11-05 12:16:00	11.8
2018-11-05 12:21:00	11.9
2018-11-05 12:26:00	11.6
2018-11-05 12:31:00	11.9
2018-11-05 12:36:00	11.7
2018-11-09 17:56:00	NA
2018-11-09 18:01:00	9.9
2018-11-09 18:06:00	10.0
2018-11-09 18:11:00	9.9
2018-11-09 18:16:00	10.0
2018-11-09 18:21:00	10.0
2018-11-09 18:26:00	10.0
2018-11-09 18:31:00	10.0
2018-11-09 18:36:00	10.0
2018-11-09 18:41:00	10.0
2018-11-09 18:46:00	10.0
2018-11-09 18:51:00	10.0
2018-11-09 18:56:00	10.0
2018-11-09 19:01:00	9.9
2018-11-09 19:06:00	10.6
2018-11-09 19:11:00	10.3
2018-11-09 19:16:00	10.3
2018-11-09 19:21:00	10.4
2018-11-09 19:26:00	10.1
2018-11-09 19:31:00	10.3
2018-11-09 19:36:00	10.1
2018-11-09 19:41:00	10.0
2018-11-09 19:46:00	10.1
2018-11-09 19:51:00	10.1
2018-11-09 19:56:00	10.1
2018-11-09 20:01:00	10.0
2018-11-09 20:06:00	10.2
2018-11-09 20:11:00	10.4
2018-11-09 20:16:00	10.4
2018-11-09 20:21:00	10.1
2018-11-09 20:26:00	10.1
2018-11-09 20:31:00	10.1
2018-11-09 20:36:00	10.3
2018-11-09 20:41:00	10.2
2018-11-09 20:46:00	10.6
2018-11-09 20:51:00	11.1
2018-11-09 20:56:00	10.2
2018-11-09 21:01:00	10.1
2018-11-09 21:06:00	10.2
2018-11-09 21:11:00	10.4
2018-11-09 21:16:00	10.2
2018-11-09 21:21:00	10.1
2018-11-09 21:26:00	10.0
2018-11-09 21:31:00	10.0
2018-11-09 21:36:00	10.0
2018-11-09 21:41:00	10.1
2018-11-09 21:46:00	10.0
2018-11-09 21:51:00	10.1
2018-11-09 21:56:00	10.3
2018-11-09 22:01:00	10.1
2018-11-09 22:06:00	10.1
2018-11-09 22:11:00	10.4
2018-11-09 22:16:00	10.2
2018-11-09 22:21:00	10.0
2018-11-09 22:26:00	10.0
2018-11-09 22:31:00	10.0
2018-11-09 22:36:00	10.0
2018-11-09 22:41:00	10.1
2018-11-09 22:46:00	10.9
2018-11-09 22:51:00	10.0
2018-11-09 22:56:00	10.1
2018-11-09 23:01:00	10.1
2018-11-09 23:06:00	10.4
2018-11-09 23:11:00	10.1
2018-11-09 23:16:00	10.0
2018-11-09 23:21:00	10.2
2018-11-09 23:26:00	10.0
2018-11-09 23:31:00	10.1
2018-11-09 23:36:00	10.1
2018-11-09 23:41:00	10.1
2018-11-09 23:46:00	10.1
2018-11-09 23:51:00	10.3
2018-11-09 23:56:00	10.2
2018-11-10 00:01:00	10.1
2018-11-10 00:06:00	10.1
2018-11-10 00:11:00	10.6
2018-11-10 00:16:00	10.1
2018-11-10 00:21:00	10.2
2018-11-10 00:26:00	10.2
2018-11-10 00:31:00	10.3
2018-11-10 00:36:00	10.3
2018-11-10 00:41:00	10.3
2018-11-10 00:46:00	10.2
2018-11-10 00:51:00	10.2
2018-11-10 00:56:00	10.4
2018-11-10 01:01:00	10.1
2018-11-10 01:06:00	10.2
2018-11-10 01:11:00	10.3
2018-11-10 01:16:00	10.1
2018-11-10 01:21:00	10.0
2018-11-10 01:26:00	10.1
2018-11-10 01:31:00	10.1
2018-11-10 01:36:00	12.8
2018-11-10 01:41:00	10.7
2018-11-10 01:46:00	13.4
2018-11-10 01:51:00	10.2
2018-11-10 01:56:00	10.0
2018-11-10 02:01:00	10.2
2018-11-10 02:06:00	10.0
2018-11-10 02:11:00	10.0
2018-11-10 02:16:00	10.1
2018-11-10 02:21:00	10.1
2018-11-10 02:26:00	10.1
2018-11-10 02:31:00	10.1
2018-11-10 02:36:00	10.2
2018-11-10 02:41:00	10.0
2018-11-10 02:46:00	10.1
2018-11-10 02:51:00	10.1
2018-11-10 02:56:00	10.3
2018-11-10 03:01:00	10.3
2018-11-10 03:06:00	10.9
[truncated: 4,382 more rows]

## Sheet: Discharge Colpach 2018
DATE	Q_m3s
2018-01-01	2366
2018-01-01 00:15:00	2366
2018-01-01 00:30:00	2409
2018-01-01 00:45:00	2387
2018-01-01 01:00:00	2355
2018-01-01 01:15:00	2377
2018-01-01 01:30:00	2303
2018-01-01 01:45:00	2282
2018-01-01 02:00:00	2313
2018-01-01 02:15:00	2271
2018-01-01 02:30:00	2.24
2018-01-01 02:45:00	2.25
2018-01-01 03:00:00	2.25
2018-01-01 03:15:00	2324
2018-01-01 03:30:00	2313
2018-01-01 03:45:00	2324
2018-01-01 04:00:00	2229
2018-01-01 04:15:00	2271
2018-01-01 04:30:00	2219
2018-01-01 04:45:00	2147
2018-01-01 05:00:00	2157
2018-01-01 05:15:00	2117
2018-01-01 05:30:00	2168
2018-01-01 05:45:00	2117
2018-01-01 06:00:00	2188
2018-01-01 06:15:00	2137
2018-01-01 06:30:00	2086
2018-01-01 06:45:00	2127
2018-01-01 07:00:00	2086
2018-01-01 07:15:00	2076
2018-01-01 07:30:00	2026
2018-01-01 07:45:00	2016
2018-01-01 08:00:00	2036
2018-01-01 08:15:00	1996
2018-01-01 08:30:00	2016
2018-01-01 08:45:00	1976
2018-01-01 09:00:00	1976
2018-01-01 09:15:00	1957
2018-01-01 09:30:00	1927
2018-01-01 09:45:00	1937
2018-01-01 10:00:00	1927
2018-01-01 10:15:00	1927
2018-01-01 10:30:00	1957
2018-01-01 10:45:00	1878
2018-01-01 11:00:00	1869
2018-01-01 11:15:00	1908
2018-01-01 11:30:00	1898
2018-01-01 11:45:00	1869
2018-01-01 12:00:00	1821
2018-01-01 12:15:00	1869
2018-01-01 12:30:00	1.83
2018-01-01 12:45:00	1.83
2018-01-01 13:00:00	1821
2018-01-01 13:15:00	1821
2018-01-01 13:30:00	1745
2018-01-01 13:45:00	1802
2018-01-01 14:00:00	1802
2018-01-01 14:15:00	1802
2018-01-01 14:30:00	1.84
2018-01-01 14:45:00	1.84
2018-01-01 15:00:00	1869
2018-01-01 15:15:00	1888
2018-01-01 15:30:00	1917
2018-01-01 15:45:00	1976
2018-01-01 16:00:00	1966
2018-01-01 16:15:00	2026
2018-01-01 16:30:00	2096
2018-01-01 16:45:00	2157
2018-01-01 17:00:00	2219
2018-01-01 17:15:00	2.24
2018-01-01 17:30:00	2303
2018-01-01 17:45:00	2377
2018-01-01 18:00:00	2387
2018-01-01 18:15:00	2398
2018-01-01 18:30:00	2441
2018-01-01 18:45:00	2462
2018-01-01 19:00:00	2484
2018-01-01 19:15:00	2528
2018-01-01 19:30:00	2571
2018-01-01 19:45:00	2582
2018-01-01 20:00:00	2649
2018-01-01 20:15:00	2.66
2018-01-01 20:30:00	2671
2018-01-01 20:45:00	2593
2018-01-01 21:00:00	2616
2018-01-01 21:15:00	2593
2018-01-01 21:30:00	2582
2018-01-01 21:45:00	2517
2018-01-01 22:00:00	2473
2018-01-01 22:15:00	2528
2018-01-01 22:30:00	2452
2018-01-01 22:45:00	2462
2018-01-01 23:00:00	2377
2018-01-01 23:15:00	2355
2018-01-01 23:30:00	2377
2018-01-01 23:45:00	2345
2018-01-02	2303
2018-01-02 00:15:00	2345
2018-01-02 00:30:00	2355
2018-01-02 00:45:00	2366
2018-01-02 01:00:00	2366
2018-01-02 01:15:00	2441
2018-01-02 01:30:00	2387
2018-01-02 01:45:00	2419
2018-01-02 02:00:00	2419
2018-01-02 02:15:00	2495
2018-01-02 02:30:00	2495
2018-01-02 02:45:00	2627
2018-01-02 03:00:00	2582
2018-01-02 03:15:00	2705
2018-01-02 03:30:00	2705
2018-01-02 03:45:00	2761
2018-01-02 04:00:00	2772
2018-01-02 04:15:00	2899
2018-01-02 04:30:00	2852
2018-01-02 04:45:00	2841
2018-01-02 05:00:00	2922
2018-01-02 05:15:00	2922
2018-01-02 05:30:00	2.98
2018-01-02 05:45:00	3051
2018-01-02 06:00:00	3051
2018-01-02 06:15:00	2.91
2018-01-02 06:30:00	2992
2018-01-02 06:45:00	3015
2018-01-02 07:00:00	3003
2018-01-02 07:15:00	3098
2018-01-02 07:30:00	3003
2018-01-02 07:45:00	2.98
2018-01-02 08:00:00	3039
2018-01-02 08:15:00	3027
2018-01-02 08:30:00	3051
2018-01-02 08:45:00	3098
2018-01-02 09:00:00	3027
2018-01-02 09:15:00	3.17
2018-01-02 09:30:00	3194
2018-01-02 09:45:00	3134
2018-01-02 10:00:00	3086
2018-01-02 10:15:00	3098
2018-01-02 10:30:00	3074
2018-01-02 10:45:00	3051
2018-01-02 11:00:00	3098
2018-01-02 11:15:00	3122
2018-01-02 11:30:00	3182
2018-01-02 11:45:00	3074
2018-01-02 12:00:00	3051
2018-01-02 12:15:00	3051
2018-01-02 12:30:00	3098
2018-01-02 12:45:00	3254
2018-01-02 13:00:00	3086
2018-01-02 13:15:00	3003
2018-01-02 13:30:00	3098
2018-01-02 13:45:00	3051
2018-01-02 14:00:00	3027
2018-01-02 14:15:00	3015
2018-01-02 14:30:00	3027
2018-01-02 14:45:00	3003
2018-01-02 15:00:00	3015
2018-01-02 15:15:00	3062
2018-01-02 15:30:00	2968
2018-01-02 15:45:00	3003
2018-01-02 16:00:00	3003
2018-01-02 16:15:00	2957
2018-01-02 16:30:00	2.98
2018-01-02 16:45:00	2922
2018-01-02 17:00:00	2945
2018-01-02 17:15:00	2.91
2018-01-02 17:30:00	2887
2018-01-02 17:45:00	2933
2018-01-02 18:00:00	2841
2018-01-02 18:15:00	2852
2018-01-02 18:30:00	2818
2018-01-02 18:45:00	2807
2018-01-02 19:00:00	2852
2018-01-02 19:15:00	2772
2018-01-02 19:30:00	2899
2018-01-02 19:45:00	2852
2018-01-02 20:00:00	2841
2018-01-02 20:15:00	2852
2018-01-02 20:30:00	2818
2018-01-02 20:45:00	2.75
2018-01-02 21:00:00	2841
2018-01-02 21:15:00	2841
2018-01-02 21:30:00	2761
2018-01-02 21:45:00	2795
2018-01-02 22:00:00	2761
2018-01-02 22:15:00	2829
2018-01-02 22:30:00	2739
2018-01-02 22:45:00	2716
2018-01-02 23:00:00	2818
2018-01-02 23:15:00	2.66
2018-01-02 23:30:00	2739
2018-01-02 23:45:00	2716
2018-01-03	2739
2018-01-03 00:15:00	2694
2018-01-03 00:30:00	2638
2018-01-03 00:45:00	2649
2018-01-03 01:00:00	2682
2018-01-03 01:15:00	2671
2018-01-03 01:30:00	2604
2018-01-03 01:45:00	2528
2018-01-03 02:00:00	2549
2018-01-03 02:15:00	2517
2018-01-03 02:30:00	2517
2018-01-03 02:45:00	2.56
2018-01-03 03:00:00	2627
2018-01-03 03:15:00	2604
2018-01-03 03:30:00	2627
2018-01-03 03:45:00	2638
2018-01-03 04:00:00	2638
2018-01-03 04:15:00	2.66
2018-01-03 04:30:00	2682
2018-01-03 04:45:00	2649
2018-01-03 05:00:00	2716
2018-01-03 05:15:00	2761
2018-01-03 05:30:00	2841
2018-01-03 05:45:00	2887
2018-01-03 06:00:00	2968
2018-01-03 06:15:00	3218
2018-01-03 06:30:00	3.23
2018-01-03 06:45:00	3122
2018-01-03 07:00:00	3134
2018-01-03 07:15:00	3182
2018-01-03 07:30:00	3206
2018-01-03 07:45:00	3328
2018-01-03 08:00:00	3315
2018-01-03 08:15:00	3254
2018-01-03 08:30:00	3218
2018-01-03 08:45:00	3158
2018-01-03 09:00:00	3062
2018-01-03 09:15:00	3039
2018-01-03 09:30:00	2887
2018-01-03 09:45:00	2875
2018-01-03 10:00:00	2864
2018-01-03 10:15:00	2807
2018-01-03 10:30:00	2739
2018-01-03 10:45:00	2807
2018-01-03 11:00:00	2795
2018-01-03 11:15:00	2705
2018-01-03 11:30:00	2761
2018-01-03 11:45:00	2716
2018-01-03 12:00:00	2694
2018-01-03 12:15:00	2761
2018-01-03 12:30:00	2705
2018-01-03 12:45:00	2.75
2018-01-03 13:00:00	2739
2018-01-03 13:15:00	2.66
2018-01-03 13:30:00	2716
2018-01-03 13:45:00	2772
2018-01-03 14:00:00	2772
2018-01-03 14:15:00	2649
2018-01-03 14:30:00	2795
2018-01-03 14:45:00	2.75
2018-01-03 15:00:00	2829
2018-01-03 15:15:00	2899
2018-01-03 15:30:00	2875
2018-01-03 15:45:00	2887
2018-01-03 16:00:00	2875
2018-01-03 16:15:00	2852
2018-01-03 16:30:00	2899
2018-01-03 16:45:00	2957
2018-01-03 17:00:00	2852
2018-01-03 17:15:00	2887
2018-01-03 17:30:00	2887
2018-01-03 17:45:00	2945
2018-01-03 18:00:00	2957
2018-01-03 18:15:00	2922
2018-01-03 18:30:00	3015
2018-01-03 18:45:00	3051
2018-01-03 19:00:00	2992
2018-01-03 19:15:00	3027
2018-01-03 19:30:00	3003
2018-01-03 19:45:00	3039
2018-01-03 20:00:00	2957
2018-01-03 20:15:00	3003
2018-01-03 20:30:00	2.98
2018-01-03 20:45:00	2957
2018-01-03 21:00:00	2968
2018-01-03 21:15:00	3003
2018-01-03 21:30:00	3003
2018-01-03 21:45:00	2.98
2018-01-03 22:00:00	2.98
2018-01-03 22:15:00	3027
2018-01-03 22:30:00	3015
2018-01-03 22:45:00	2992
2018-01-03 23:00:00	2968
2018-01-03 23:15:00	2933
2018-01-03 23:30:00	2852
2018-01-03 23:45:00	3039
2018-01-04	2957
2018-01-04 00:15:00	2899
2018-01-04 00:30:00	2933
2018-01-04 00:45:00	2.91
2018-01-04 01:00:00	2875
2018-01-04 01:15:00	2933
2018-01-04 01:30:00	2957
2018-01-04 01:45:00	2945
2018-01-04 02:00:00	2922
2018-01-04 02:15:00	2968
2018-01-04 02:30:00	2957
2018-01-04 02:45:00	2852
2018-01-04 03:00:00	2852
2018-01-04 03:15:00	2875
2018-01-04 03:30:00	2795
2018-01-04 03:45:00	2841
2018-01-04 04:00:00	2716
2018-01-04 04:15:00	2772
2018-01-04 04:30:00	2.75
2018-01-04 04:45:00	2705
2018-01-04 05:00:00	2682
2018-01-04 05:15:00	2694
2018-01-04 05:30:00	2.66
2018-01-04 05:45:00	2627
2018-01-04 06:00:00	2739
2018-01-04 06:15:00	2.66
2018-01-04 06:30:00	2638
2018-01-04 06:45:00	2604
2018-01-04 07:00:00	2627
2018-01-04 07:15:00	2649
2018-01-04 07:30:00	2517
2018-01-04 07:45:00	2582
2018-01-04 08:00:00	2538
2018-01-04 08:15:00	2.56
2018-01-04 08:30:00	2528
2018-01-04 08:45:00	2495
2018-01-04 09:00:00	2549
2018-01-04 09:15:00	2549
2018-01-04 09:30:00	2528
2018-01-04 09:45:00	2549
2018-01-04 10:00:00	2549
2018-01-04 10:15:00	2549
2018-01-04 10:30:00	2.56
2018-01-04 10:45:00	2571
2018-01-04 11:00:00	2549
2018-01-04 11:15:00	2582
2018-01-04 11:30:00	2538
2018-01-04 11:45:00	2571
2018-01-04 12:00:00	2.56
2018-01-04 12:15:00	2538
2018-01-04 12:30:00	2571
2018-01-04 12:45:00	2549
2018-01-04 13:00:00	2593
2018-01-04 13:15:00	2638
2018-01-04 13:30:00	2593
2018-01-04 13:45:00	2638
2018-01-04 14:00:00	2627
2018-01-04 14:15:00	2616
2018-01-04 14:30:00	2538
2018-01-04 14:45:00	2627
2018-01-04 15:00:00	2.56
2018-01-04 15:15:00	2627
2018-01-04 15:30:00	2649
2018-01-04 15:45:00	2.56
2018-01-04 16:00:00	2528
2018-01-04 16:15:00	2549
2018-01-04 16:30:00	2473
2018-01-04 16:45:00	2.56
2018-01-04 17:00:00	2593
2018-01-04 17:15:00	2616
2018-01-04 17:30:00	2.56
2018-01-04 17:45:00	2495
2018-01-04 18:00:00	2593
2018-01-04 18:15:00	2593
2018-01-04 18:30:00	2484
2018-01-04 18:45:00	2528
2018-01-04 19:00:00	2616
2018-01-04 19:15:00	2649
2018-01-04 19:30:00	2582
2018-01-04 19:45:00	2495
2018-01-04 20:00:00	2409
2018-01-04 20:15:00	2409
2018-01-04 20:30:00	2377
2018-01-04 20:45:00	2387
2018-01-04 21:00:00	2398
2018-01-04 21:15:00	2334
2018-01-04 21:30:00	2355
2018-01-04 21:45:00	2292
2018-01-04 22:00:00	2303
2018-01-04 22:15:00	2261
2018-01-04 22:30:00	2303
2018-01-04 22:45:00	2303
2018-01-04 23:00:00	2303
2018-01-04 23:15:00	2313
2018-01-04 23:30:00	2313
2018-01-04 23:45:00	2345
2018-01-05	2261
2018-01-05 00:15:00	2366
2018-01-05 00:30:00	2345
2018-01-05 00:45:00	2334
2018-01-05 01:00:00	2292
2018-01-05 01:15:00	2377
2018-01-05 01:30:00	2366
2018-01-05 01:45:00	2334
2018-01-05 02:00:00	2387
2018-01-05 02:15:00	2334
2018-01-05 02:30:00	2398
2018-01-05 02:45:00	2462
2018-01-05 03:00:00	2409
2018-01-05 03:15:00	2387
2018-01-05 03:30:00	2419
2018-01-05 03:45:00	2398
2018-01-05 04:00:00	2419
2018-01-05 04:15:00	2452
2018-01-05 04:30:00	2506
2018-01-05 04:45:00	2473
2018-01-05 05:00:00	2528
2018-01-05 05:15:00	2484
2018-01-05 05:30:00	2506
2018-01-05 05:45:00	2517
2018-01-05 06:00:00	2593
2018-01-05 06:15:00	2506
2018-01-05 06:30:00	2582
2018-01-05 06:45:00	2549
2018-01-05 07:00:00	2649
2018-01-05 07:15:00	2638
2018-01-05 07:30:00	2627
2018-01-05 07:45:00	2772
2018-01-05 08:00:00	2671
2018-01-05 08:15:00	2649
2018-01-05 08:30:00	2671
2018-01-05 08:45:00	2671
2018-01-05 09:00:00	2649
2018-01-05 09:15:00	2671
2018-01-05 09:30:00	2649
2018-01-05 09:45:00	2627
2018-01-05 10:00:00	2694
2018-01-05 10:15:00	2604
2018-01-05 10:30:00	2638
2018-01-05 10:45:00	2593
2018-01-05 11:00:00	2.56
2018-01-05 11:15:00	2604
2018-01-05 11:30:00	2582
2018-01-05 11:45:00	2.56
2018-01-05 12:00:00	2582
2018-01-05 12:15:00	2.56
2018-01-05 12:30:00	2517
2018-01-05 12:45:00	2549
2018-01-05 13:00:00	2549
2018-01-05 13:15:00	2538
2018-01-05 13:30:00	2538
2018-01-05 13:45:00	2549
2018-01-05 14:00:00	2506
2018-01-05 14:15:00	2517
2018-01-05 14:30:00	2506
2018-01-05 14:45:00	2.43
2018-01-05 15:00:00	2419
2018-01-05 15:15:00	2528
2018-01-05 15:30:00	2419
2018-01-05 15:45:00	2419
2018-01-05 16:00:00	2441
2018-01-05 16:15:00	2.43
2018-01-05 16:30:00	2355
2018-01-05 16:45:00	2398
2018-01-05 17:00:00	2324
2018-01-05 17:15:00	2409
2018-01-05 17:30:00	2387
2018-01-05 17:45:00	2441
2018-01-05 18:00:00	2409
2018-01-05 18:15:00	2355
2018-01-05 18:30:00	2292
2018-01-05 18:45:00	2303
2018-01-05 19:00:00	2282
2018-01-05 19:15:00	2303
2018-01-05 19:30:00	2.25
2018-01-05 19:45:00	2271
2018-01-05 20:00:00	2282
2018-01-05 20:15:00	2261
2018-01-05 20:30:00	2219
2018-01-05 20:45:00	2147
2018-01-05 21:00:00	2209
2018-01-05 21:15:00	2229
2018-01-05 21:30:00	2209
2018-01-05 21:45:00	2198
2018-01-05 22:00:00	2188
2018-01-05 22:15:00	2178
2018-01-05 22:30:00	2106
2018-01-05 22:45:00	2157
2018-01-05 23:00:00	2127
2018-01-05 23:15:00	2188
2018-01-05 23:30:00	2188
2018-01-05 23:45:00	2117
2018-01-06	2117
2018-01-06 00:15:00	2086
2018-01-06 00:30:00	2076
2018-01-06 00:45:00	2096
2018-01-06 01:00:00	2036
2018-01-06 01:15:00	2016
2018-01-06 01:30:00	2056
2018-01-06 01:45:00	2046
2018-01-06 02:00:00	2046
2018-01-06 02:15:00	2076
2018-01-06 02:30:00	2026
2018-01-06 02:45:00	2016
2018-01-06 03:00:00	1986
2018-01-06 03:15:00	2006
2018-01-06 03:30:00	1976
2018-01-06 03:45:00	1957
2018-01-06 04:00:00	2006
2018-01-06 04:15:00	1996
2018-01-06 04:30:00	2006
2018-01-06 04:45:00	1957
2018-01-06 05:00:00	1957
2018-01-06 05:15:00	1937
2018-01-06 05:30:00	1957
2018-01-06 05:45:00	1947
2018-01-06 06:00:00	1927
2018-01-06 06:15:00	1917
2018-01-06 06:30:00	1888
2018-01-06 06:45:00	1927
2018-01-06 07:00:00	1869
2018-01-06 07:15:00	1849
2018-01-06 07:30:00	1859
2018-01-06 07:45:00	1888
2018-01-06 08:00:00	1898
2018-01-06 08:15:00	1859
2018-01-06 08:30:00	1.83
2018-01-06 08:45:00	1859
2018-01-06 09:00:00	1.84
2018-01-06 09:15:00	1888
2018-01-06 09:30:00	1859
2018-01-06 09:45:00	1.83
2018-01-06 10:00:00	1.83
2018-01-06 10:15:00	1802
2018-01-06 10:30:00	1783
2018-01-06 10:45:00	1783
2018-01-06 11:00:00	1773
2018-01-06 11:15:00	1754
2018-01-06 11:30:00	1764
2018-01-06 11:45:00	1745
2018-01-06 12:00:00	1745
2018-01-06 12:15:00	1745
2018-01-06 12:30:00	1745
2018-01-06 12:45:00	1764
2018-01-06 13:00:00	1707
2018-01-06 13:15:00	1745
2018-01-06 13:30:00	1717
2018-01-06 13:45:00	1698
2018-01-06 14:00:00	1698
2018-01-06 14:15:00	1679
2018-01-06 14:30:00	1661
2018-01-06 14:45:00	1642
2018-01-06 15:00:00	1698
2018-01-06 15:15:00	1.67
2018-01-06 15:30:00	1679
2018-01-06 15:45:00	1642
2018-01-06 16:00:00	1624
2018-01-06 16:15:00	1597
2018-01-06 16:30:00	1.67
2018-01-06 16:45:00	1661
2018-01-06 17:00:00	1624
2018-01-06 17:15:00	1633
2018-01-06 17:30:00	1606
2018-01-06 17:45:00	1606
2018-01-06 18:00:00	1606
2018-01-06 18:15:00	1597
2018-01-06 18:30:00	1578
2018-01-06 18:45:00	1588
2018-01-06 19:00:00	1624
2018-01-06 19:15:00	1.56
2018-01-06 19:30:00	1578
2018-01-06 19:45:00	1542
2018-01-06 20:00:00	1551
2018-01-06 20:15:00	1597
2018-01-06 20:30:00	1597
2018-01-06 20:45:00	1578
2018-01-06 21:00:00	1578
2018-01-06 21:15:00	1533
2018-01-06 21:30:00	1542
2018-01-06 21:45:00	1542
2018-01-06 22:00:00	1542
2018-01-06 22:15:00	1524
2018-01-06 22:30:00	1542
2018-01-06 22:45:00	1542
2018-01-06 23:00:00	1524
2018-01-06 23:15:00	1515
2018-01-06 23:30:00	1489
2018-01-06 23:45:00	1.48
2018-01-07	1498
2018-01-07 00:15:00	1515
2018-01-07 00:30:00	1507
2018-01-07 00:45:00	1471
2018-01-07 01:00:00	1471
2018-01-07 01:15:00	1462
2018-01-07 01:30:00	1462
2018-01-07 01:45:00	1427
2018-01-07 02:00:00	1471
2018-01-07 02:15:00	1427
2018-01-07 02:30:00	1427
2018-01-07 02:45:00	1.41
2018-01-07 03:00:00	1.41
2018-01-07 03:15:00	1418
2018-01-07 03:30:00	1.41
2018-01-07 03:45:00	1375
2018-01-07 04:00:00	1375
2018-01-07 04:15:00	1392
2018-01-07 04:30:00	1384
2018-01-07 04:45:00	1384
2018-01-07 05:00:00	1332
2018-01-07 05:15:00	1358
2018-01-07 05:30:00	1324
2018-01-07 05:45:00	1349
2018-01-07 06:00:00	1332
2018-01-07 06:15:00	1315
2018-01-07 06:30:00	1.29
2018-01-07 06:45:00	1307
2018-01-07 07:00:00	1324
2018-01-07 07:15:00	1298
2018-01-07 07:30:00	1298
2018-01-07 07:45:00	1.29
2018-01-07 08:00:00	1282
2018-01-07 08:15:00	1273
2018-01-07 08:30:00	1.29
2018-01-07 08:45:00	1273
2018-01-07 09:00:00	1257
2018-01-07 09:15:00	1273
2018-01-07 09:30:00	1273
2018-01-07 09:45:00	1282
2018-01-07 10:00:00	1265
2018-01-07 10:15:00	1248
2018-01-07 10:30:00	1232
2018-01-07 10:45:00	1215
2018-01-07 11:00:00	1223
2018-01-07 11:15:00	1223
2018-01-07 11:30:00	1.19
2018-01-07 11:45:00	1199
2018-01-07 12:00:00	1.19
2018-01-07 12:15:00	1.19
2018-01-07 12:30:00	1174
2018-01-07 12:45:00	1174
2018-01-07 13:00:00	1.19
2018-01-07 13:15:00	1215
2018-01-07 13:30:00	1.19
2018-01-07 13:45:00	1174
2018-01-07 14:00:00	1174
2018-01-07 14:15:00	1.19
2018-01-07 14:30:00	1142
2018-01-07 14:45:00	1142
2018-01-07 15:00:00	1.15
2018-01-07 15:15:00	1158
2018-01-07 15:30:00	1142
2018-01-07 15:45:00	1126
2018-01-07 16:00:00	1134
2018-01-07 16:15:00	1118
2018-01-07 16:30:00	1.11
2018-01-07 16:45:00	1102
2018-01-07 17:00:00	1094
2018-01-07 17:15:00	1102
2018-01-07 17:30:00	1102
2018-01-07 17:45:00	1102
2018-01-07 18:00:00	1102
2018-01-07 18:15:00	1094
2018-01-07 18:30:00	1.07
2018-01-07 18:45:00	1102
2018-01-07 19:00:00	1086
2018-01-07 19:15:00	1078
2018-01-07 19:30:00	1.07
2018-01-07 19:45:00	1062
2018-01-07 20:00:00	1054
2018-01-07 20:15:00	1046
2018-01-07 20:30:00	1054
2018-01-07 20:45:00	1054
2018-01-07 21:00:00	1054
2018-01-07 21:15:00	1039
2018-01-07 21:30:00	1031
2018-01-07 21:45:00	1031
2018-01-07 22:00:00	1015
2018-01-07 22:15:00	1023
2018-01-07 22:30:00	1015
2018-01-07 22:45:00	1015
2018-01-07 23:00:00	1023
2018-01-07 23:15:00	1007
2018-01-07 23:30:00	0.992
2018-01-07 23:45:00	0.984
2018-01-08	0.992
2018-01-08 00:00:15
2018-01-08 00:30:00	0.992
2018-01-08 00:45:00	0.992
2018-01-08 01:00:00	0.984
2018-01-08 01:15:00	0.984
2018-01-08 01:30:00	0.984
2018-01-08 01:45:00	0.954
2018-01-08 02:00:00	0.969
2018-01-08 02:15:00	0.969
2018-01-08 02:30:00	0.961
2018-01-08 02:45:00	0.969
2018-01-08 03:00:00	0.954
2018-01-08 03:15:00	0.954
2018-01-08 03:30:00	0.969
2018-01-08 03:45:00	0.954
2018-01-08 04:00:00	0.961
2018-01-08 04:15:00	0.931
2018-01-08 04:30:00	0.939
2018-01-08 04:45:00	0.939
2018-01-08 05:00:00	0.946
2018-01-08 05:15:00	0.931
2018-01-08 05:30:00	0.931
2018-01-08 05:45:00	0.924
2018-01-08 06:00:00	0.916
2018-01-08 06:15:00	0.909
2018-01-08 06:30:00	0.916
2018-01-08 06:45:00	0.901
2018-01-08 07:00:00	0.896
2018-01-08 07:15:00	0.886
2018-01-08 07:30:00	0.896
2018-01-08 07:45:00	0.891
2018-01-08 08:00:00	0.891
2018-01-08 08:15:00	0.901
2018-01-08 08:30:00	0.896
2018-01-08 08:45:00	0.88
2018-01-08 09:00:00	0.886
2018-01-08 09:15:00	0.891
2018-01-08 09:30:00	0.886
2018-01-08 09:45:00	0.87
2018-01-08 10:00:00	0.886
2018-01-08 10:15:00	0.87
2018-01-08 10:30:00	0.87
2018-01-08 10:45:00	0.865
2018-01-08 11:00:00	0.875
2018-01-08 11:15:00	0.875
2018-01-08 11:30:00	0.86
2018-01-08 11:45:00	0.87
2018-01-08 12:00:00	0.86
2018-01-08 12:15:00	0.87
2018-01-08 12:30:00	0.86
2018-01-08 12:45:00	0.865
2018-01-08 13:00:00	0.86
2018-01-08 13:15:00	0.855
2018-01-08 13:30:00	0.849
2018-01-08 13:45:00	0.849
2018-01-08 14:00:00	0.844
2018-01-08 14:15:00	0.849
2018-01-08 14:30:00	0.844
2018-01-08 14:45:00	0.849
2018-01-08 15:00:00	0.839
2018-01-08 15:15:00	0.844
2018-01-08 15:30:00	0.855
2018-01-08 15:45:00	0.834
2018-01-08 16:00:00	0.834
2018-01-08 16:15:00	0.844
2018-01-08 16:30:00	0.829
2018-01-08 16:45:00	0.824
2018-01-08 17:00:00	0.829
2018-01-08 17:15:00	0.829
2018-01-08 17:30:00	0.824
2018-01-08 17:45:00	0.824
2018-01-08 18:00:00	0.824
2018-01-08 18:15:00	0.819
2018-01-08 18:30:00	0.814
2018-01-08 18:45:00	0.819
2018-01-08 19:00:00	0.824
2018-01-08 19:15:00	0.809
2018-01-08 19:30:00	0.809
2018-01-08 19:45:00	0.814
2018-01-08 20:00:00	0.809
2018-01-08 20:15:00	0.804
2018-01-08 20:30:00	0.814
2018-01-08 20:45:00	0.799
2018-01-08 21:00:00	0.799
2018-01-08 21:15:00	0.794
2018-01-08 21:30:00	0.794
2018-01-08 21:45:00	0.799
2018-01-08 22:00:00	0.804
2018-01-08 22:15:00	0.794
2018-01-08 22:30:00	0.784
2018-01-08 22:45:00	0.779
2018-01-08 23:00:00	0.794
2018-01-08 23:15:00	0.784
2018-01-08 23:30:00	0.784
2018-01-08 23:45:00	0.784
2018-01-09	0.784
2018-01-09 00:15:00	0.774
2018-01-09 00:30:00	0.779
2018-01-09 00:45:00	0.779
2018-01-09 01:00:00	0.779
2018-01-09 01:15:00	0.774
2018-01-09 01:30:00	0.769
2018-01-09 01:45:00	0.779
2018-01-09 02:00:00	0.769
2018-01-09 02:15:00	0.764
2018-01-09 02:30:00	0.76
2018-01-09 02:45:00	0.764
2018-01-09 03:00:00	0.769
2018-01-09 03:15:00	0.764
2018-01-09 03:30:00	0.76
2018-01-09 03:45:00	0.75
2018-01-09 04:00:00	0.755
2018-01-09 04:15:00	0.75
2018-01-09 04:30:00	0.75
2018-01-09 04:45:00	0.75
2018-01-09 05:00:00	0.764
2018-01-09 05:15:00	0.75
2018-01-09 05:30:00	0.745
2018-01-09 05:45:00	0.755
2018-01-09 06:00:00	0.755
2018-01-09 06:15:00	0.735
2018-01-09 06:30:00	0.745
2018-01-09 06:45:00	0.735
2018-01-09 07:00:00	0.75
2018-01-09 07:15:00	0.74
2018-01-09 07:30:00	0.74
2018-01-09 07:45:00	0.74
2018-01-09 08:00:00	0.735
2018-01-09 08:15:00	0.731
2018-01-09 08:30:00	0.731
2018-01-09 08:45:00	0.731
2018-01-09 09:00:00	0.735
2018-01-09 09:15:00	0.721
2018-01-09 09:30:00	0.721
2018-01-09 09:45:00	0.721
2018-01-09 10:00:00	0.731
2018-01-09 10:15:00	0.721
2018-01-09 10:30:00	0.726
2018-01-09 10:45:00	0.721
2018-01-09 11:00:00	0.721
2018-01-09 11:15:00	0.716
2018-01-09 11:30:00	0.716
2018-01-09 11:45:00	0.712
2018-01-09 12:00:00	0.712
2018-01-09 12:15:00	0.707
2018-01-09 12:30:00	0.707
2018-01-09 12:45:00	0.712
2018-01-09 13:00:00	0.712
2018-01-09 13:15:00	0.712
2018-01-09 13:30:00	0.698
2018-01-09 13:45:00	0.702
2018-01-09 14:00:00	0.716
2018-01-09 14:15:00	0.702
2018-01-09 14:30:00	0.698
2018-01-09 14:45:00	0.693
2018-01-09 15:00:00	0.698
2018-01-09 15:15:00	0.702
2018-01-09 15:30:00	0.707
2018-01-09 15:45:00	0.698
2018-01-09 16:00:00	0.698
2018-01-09 16:15:00	0.693
2018-01-09 16:30:00	0.688
2018-01-09 16:45:00	0.684
2018-01-09 17:00:00	0.688
2018-01-09 17:15:00	0.684
2018-01-09 17:30:00	0.684
2018-01-09 17:45:00	0.679
2018-01-09 18:00:00	0.684
2018-01-09 18:15:00	0.675
2018-01-09 18:30:00	0.684
2018-01-09 18:45:00	0.679
2018-01-09 19:00:00	0.675
2018-01-09 19:15:00	0.679
2018-01-09 19:30:00	0.67
2018-01-09 19:45:00	0.675
2018-01-09 20:00:00	0.675
2018-01-09 20:15:00	0.67
2018-01-09 20:30:00	0.661
2018-01-09 20:45:00	0.67
2018-01-09 21:00:00	0.665
2018-01-09 21:15:00	0.661
2018-01-09 21:30:00	0.661
2018-01-09 21:45:00	0.67
2018-01-09 22:00:00	0.656
2018-01-09 22:15:00	0.665
2018-01-09 22:30:00	0.665
2018-01-09 22:45:00	0.665
2018-01-09 23:00:00	0.661
2018-01-09 23:15:00	0.652
2018-01-09 23:30:00	0.652
2018-01-09 23:45:00	0.656
2018-01-10	0.647
2018-01-10 00:15:00	0.652
2018-01-10 00:30:00	0.647
2018-01-10 00:45:00	0.638
2018-01-10 01:00:00	0.643
2018-01-10 01:15:00	0.643
2018-01-10 01:30:00	0.643
2018-01-10 01:45:00	0.638
2018-01-10 02:00:00	0.638
2018-01-10 02:15:00	0.638
2018-01-10 02:30:00	0.634
2018-01-10 02:45:00	0.634
2018-01-10 03:00:00	0.638
2018-01-10 03:15:00	0.634
2018-01-10 03:30:00	0.634
2018-01-10 03:45:00	0.629
2018-01-10 04:00:00	0.629
2018-01-10 04:15:00	0.634
2018-01-10 04:30:00	0.634
2018-01-10 04:45:00	0.638
2018-01-10 05:00:00	0.638
2018-01-10 05:15:00	0.629
2018-01-10 05:30:00	0.629
2018-01-10 05:45:00	0.634
2018-01-10 06:00:00	0.629
2018-01-10 06:15:00	0.625
2018-01-10 06:30:00	0.634
2018-01-10 06:45:00	0.629
2018-01-10 07:00:00	0.629
2018-01-10 07:15:00	0.625
2018-01-10 07:30:00	0.612
2018-01-10 07:45:00	0.625
2018-01-10 08:00:00	0.625
2018-01-10 08:15:00	0.621
2018-01-10 08:30:00	0.616
2018-01-10 08:45:00	0.616
2018-01-10 09:00:00	0.612
2018-01-10 09:15:00	0.607
2018-01-10 09:30:00	0.607
2018-01-10 09:45:00	0.612
2018-01-10 10:00:00	0.603
2018-01-10 10:15:00	0.603
2018-01-10 10:30:00	0.603
2018-01-10 10:45:00	0.607
2018-01-10 11:00:00	0.599
2018-01-10 11:15:00	0.594
2018-01-10 11:30:00	0.59
2018-01-10 11:45:00	0.599
2018-01-10 12:00:00	0.59
2018-01-10 12:15:00	0.594
2018-01-10 12:30:00	0.586
2018-01-10 12:45:00	0.594
2018-01-10 13:00:00	0.586
2018-01-10 13:15:00	0.59
2018-01-10 13:30:00	0.586
2018-01-10 13:45:00	0.586
2018-01-10 14:00:00	0.59
2018-01-10 14:15:00	0.581
2018-01-10 14:30:00	0.586
2018-01-10 14:45:00	0.586
2018-01-10 15:00:00	0.586
2018-01-10 15:15:00	0.581
2018-01-10 15:30:00	0.577
2018-01-10 15:45:00	0.577
2018-01-10 16:00:00	0.577
2018-01-10 16:15:00	0.564
2018-01-10 16:30:00	0.569
2018-01-10 16:45:00	0.573
2018-01-10 17:00:00	0.569
2018-01-10 17:15:00	0.569
2018-01-10 17:30:00	0.573
2018-01-10 17:45:00	0.573
2018-01-10 18:00:00	0.573
2018-01-10 18:15:00	0.573
2018-01-10 18:30:00	0.569
2018-01-10 18:45:00	0.564
2018-01-10 19:00:00	0.569
2018-01-10 19:15:00	0.564
2018-01-10 19:30:00	0.569
2018-01-10 19:45:00	0.564
2018-01-10 20:00:00	0.564
2018-01-10 20:15:00	0.56
2018-01-10 20:30:00	0.556
2018-01-10 20:45:00	0.556
2018-01-10 21:00:00	0.556
2018-01-10 21:15:00	0.556
2018-01-10 21:30:00	0.552
2018-01-10 21:45:00	0.556
2018-01-10 22:00:00	0.556
2018-01-10 22:15:00	0.543
2018-01-10 22:30:00	0.552
2018-01-10 22:45:00	0.552
2018-01-10 23:00:00	0.548
2018-01-10 23:15:00	0.543
2018-01-10 23:30:00	0.543
2018-01-10 23:45:00	0.543
2018-01-11	0.539
2018-01-11 00:15:00	0.543
2018-01-11 00:30:00	0.543
2018-01-11 00:45:00	0.539
2018-01-11 01:00:00	0.543
2018-01-11 01:15:00	0.543
2018-01-11 01:30:00	0.56
2018-01-11 01:45:00	0.573
2018-01-11 02:00:00	0.56
2018-01-11 02:15:00	0.552
2018-01-11 02:30:00	0.552
2018-01-11 02:45:00	0.548
2018-01-11 03:00:00	0.543
2018-01-11 03:15:00	0.543
2018-01-11 03:30:00	0.543
2018-01-11 03:45:00	0.556
2018-01-11 04:00:00	0.556
2018-01-11 04:15:00	0.56
2018-01-11 04:30:00	0.556
2018-01-11 04:45:00	0.552
2018-01-11 05:00:00	0.543
2018-01-11 05:15:00	0.543
2018-01-11 05:30:00	0.548
2018-01-11 05:45:00	0.543
2018-01-11 06:00:00	0.539
2018-01-11 06:15:00	0.543
2018-01-11 06:30:00	0.539
2018-01-11 06:45:00	0.535
2018-01-11 07:00:00	0.539
2018-01-11 07:15:00	0.531
2018-01-11 07:30:00	0.531
2018-01-11 07:45:00	0.527
2018-01-11 08:00:00	0.531
2018-01-11 08:15:00	0.531
2018-01-11 08:30:00	0.519
2018-01-11 08:45:00	0.519
2018-01-11 09:00:00	0.515
2018-01-11 09:15:00	0.519
2018-01-11 09:30:00	0.519
2018-01-11 09:45:00	0.515
2018-01-11 10:00:00	0.515
2018-01-11 10:15:00	0.515
2018-01-11 10:30:00	0.503
2018-01-11 10:45:00	0.507
2018-01-11 11:00:00	0.503
2018-01-11 11:15:00	0.507
2018-01-11 11:30:00	0.499
2018-01-11 11:45:00	0.499
2018-01-11 12:00:00	0.499
2018-01-11 12:15:00	0.499
2018-01-11 12:30:00	0.499
2018-01-11 12:45:00	0.491
2018-01-11 13:00:00	0.495
2018-01-11 13:15:00	0.491
2018-01-11 13:30:00	0.495
2018-01-11 13:45:00	0.491
2018-01-11 14:00:00	0.487
2018-01-11 14:15:00	0.491
2018-01-11 14:30:00	0.487
2018-01-11 14:45:00	0.487
2018-01-11 15:00:00	0.483
2018-01-11 15:15:00	0.479
2018-01-11 15:30:00	0.483
2018-01-11 15:45:00	0.487
2018-01-11 16:00:00	0.475
2018-01-11 16:15:00	0.479
2018-01-11 16:30:00	0.475
2018-01-11 16:45:00	0.467
2018-01-11 17:00:00	0.475
2018-01-11 17:15:00	0.475
2018-01-11 17:30:00	0.471
2018-01-11 17:45:00	0.467
2018-01-11 18:00:00	0.467
2018-01-11 18:15:00	0.471
2018-01-11 18:30:00	0.471
2018-01-11 18:45:00	0.464
2018-01-11 19:00:00	0.464
2018-01-11 19:15:00	0.464
2018-01-11 19:30:00	0.464
2018-01-11 19:45:00	0.456
2018-01-11 20:00:00	0.467
2018-01-11 20:15:00	0.46
2018-01-11 20:30:00	0.452
2018-01-11 20:45:00	0.46
2018-01-11 21:00:00	0.456
2018-01-11 21:15:00	0.452
2018-01-11 21:30:00	0.452
2018-01-11 21:45:00	0.456
2018-01-11 22:00:00	0.448
2018-01-11 22:15:00	0.452
2018-01-11 22:30:00	0.456
2018-01-11 22:45:00	0.448
2018-01-11 23:00:00	0.448
2018-01-11 23:15:00	0.445
2018-01-11 23:30:00	0.445
2018-01-11 23:45:00	0.448
2018-01-12	0.445
2018-01-12 00:15:00	0.441
2018-01-12 00:30:00	0.445
2018-01-12 00:45:00	0.441
2018-01-12 01:00:00	0.441
2018-01-12 01:15:00	0.441
2018-01-12 01:30:00	0.437
2018-01-12 01:45:00	0.437
2018-01-12 02:00:00	0.437
2018-01-12 02:15:00	0.433
2018-01-12 02:30:00	0.433
2018-01-12 02:45:00	0.43
2018-01-12 03:00:00	0.433
2018-01-12 03:15:00	0.433
2018-01-12 03:30:00	0.426
2018-01-12 03:45:00	0.422
2018-01-12 04:00:00	0.43
2018-01-12 04:15:00	0.426
2018-01-12 04:30:00	0.426
2018-01-12 04:45:00	0.422
2018-01-12 05:00:00	0.422
2018-01-12 05:15:00	0.422
2018-01-12 05:30:00	0.422
2018-01-12 05:45:00	0.422
2018-01-12 06:00:00	0.422
2018-01-12 06:15:00	0.422
2018-01-12 06:30:00	0.422
2018-01-12 06:45:00	0.419
2018-01-12 07:00:00	0.419
2018-01-12 07:15:00	0.419
2018-01-12 07:30:00	0.415
2018-01-12 07:45:00	0.419
2018-01-12 08:00:00	0.415
2018-01-12 08:15:00	0.411
2018-01-12 08:30:00	0.415
2018-01-12 08:45:00	0.411
2018-01-12 09:00:00	0.415
2018-01-12 09:15:00	0.411
2018-01-12 09:30:00	0.408
2018-01-12 09:45:00	0.408
2018-01-12 10:00:00	0.408
2018-01-12 10:15:00	0.408
2018-01-12 10:30:00	0.404
2018-01-12 10:45:00	0.404
2018-01-12 11:00:00	0.404
2018-01-12 11:15:00	0.4
2018-01-12 11:30:00	0.4
2018-01-12 11:45:00	0.404
2018-01-12 12:00:00	0.404
2018-01-12 12:15:00	0.404
2018-01-12 12:30:00	0.4
2018-01-12 12:45:00	0.397
2018-01-12 13:00:00	0.397
2018-01-12 13:15:00	0.4
2018-01-12 13:30:00	0.4
2018-01-12 13:45:00	0.397
2018-01-12 14:00:00	0.393
2018-01-12 14:15:00	0.393
2018-01-12 14:30:00	0.393
2018-01-12 14:45:00	0.397
2018-01-12 15:00:00	0.393
2018-01-12 15:15:00	0.39
2018-01-12 15:30:00	0.39
2018-01-12 15:45:00	0.39
2018-01-12 16:00:00	0.393
2018-01-12 16:15:00	0.39
2018-01-12 16:30:00	0.386
2018-01-12 16:45:00	0.386
2018-01-12 17:00:00	0.383
2018-01-12 17:15:00	0.386
2018-01-12 17:30:00	0.383
2018-01-12 17:45:00	0.383
2018-01-12 18:00:00	0.379
2018-01-12 18:15:00	0.379
2018-01-12 18:30:00	0.383
2018-01-12 18:45:00	0.379
2018-01-12 19:00:00	0.379
2018-01-12 19:15:00	0.379
2018-01-12 19:30:00	0.376
2018-01-12 19:45:00	0.379
2018-01-12 20:00:00	0.376
2018-01-12 20:15:00	0.376
2018-01-12 20:30:00	0.383
2018-01-12 20:45:00	0.379
2018-01-12 21:00:00	0.379
2018-01-12 21:15:00	0.376
2018-01-12 21:30:00	0.376
2018-01-12 21:45:00	0.372
2018-01-12 22:00:00	0.372
2018-01-12 22:15:00	0.376
2018-01-12 22:30:00	0.376
2018-01-12 22:45:00	0.369
2018-01-12 23:00:00	0.372
2018-01-12 23:15:00	0.372
2018-01-12 23:30:00	0.369
2018-01-12 23:45:00	0.372
2018-01-13	0.369
2018-01-13 00:15:00	0.369
2018-01-13 00:30:00	0.369
2018-01-13 00:45:00	0.365
2018-01-13 01:00:00	0.369
2018-01-13 01:15:00	0.369
2018-01-13 01:30:00	0.369
2018-01-13 01:45:00	0.365
2018-01-13 02:00:00	0.365
2018-01-13 02:15:00	0.365
2018-01-13 02:30:00	0.365
2018-01-13 02:45:00	0.365
2018-01-13 03:00:00	0.362
2018-01-13 03:15:00	0.362
2018-01-13 03:30:00	0.362
2018-01-13 03:45:00	0.362
2018-01-13 04:00:00	0.358
2018-01-13 04:15:00	0.358
2018-01-13 04:30:00	0.362
2018-01-13 04:45:00	0.362
2018-01-13 05:00:00	0.358
2018-01-13 05:15:00	0.362
2018-01-13 05:30:00	0.358
2018-01-13 05:45:00	0.355
2018-01-13 06:00:00	0.355
2018-01-13 06:15:00	0.358
2018-01-13 06:30:00	0.358
2018-01-13 06:45:00	0.358
2018-01-13 07:00:00	0.355
2018-01-13 07:15:00	0.358
2018-01-13 07:30:00	0.358
2018-01-13 07:45:00	0.355
2018-01-13 08:00:00	0.352
2018-01-13 08:15:00	0.355
2018-01-13 08:30:00	0.352
2018-01-13 08:45:00	0.352
2018-01-13 09:00:00	0.355
2018-01-13 09:15:00	0.352
2018-01-13 09:30:00	0.352
2018-01-13 09:45:00	0.352
2018-01-13 10:00:00	0.352
2018-01-13 10:15:00	0.348
2018-01-13 10:30:00	0.348
2018-01-13 10:45:00	0.348
2018-01-13 11:00:00	0.345
2018-01-13 11:15:00	0.345
2018-01-13 11:30:00	0.345
2018-01-13 11:45:00	0.345
2018-01-13 12:00:00	0.348
2018-01-13 12:15:00	0.348
2018-01-13 12:30:00	0.345
2018-01-13 12:45:00	0.348
2018-01-13 13:00:00	0.345
2018-01-13 13:15:00	0.342
2018-01-13 13:30:00	0.342
2018-01-13 13:45:00	0.348
2018-01-13 14:00:00	0.345
2018-01-13 14:15:00	0.342
2018-01-13 14:30:00	0.345
2018-01-13 14:45:00	0.345
2018-01-13 15:00:00	0.342
2018-01-13 15:15:00	0.345
2018-01-13 15:30:00	0.342
2018-01-13 15:45:00	0.342
2018-01-13 16:00:00	0.342
2018-01-13 16:15:00	0.345
2018-01-13 16:30:00	0.342
2018-01-13 16:45:00	0.342
2018-01-13 17:00:00	0.338
2018-01-13 17:15:00	0.342
2018-01-13 17:30:00	0.342
2018-01-13 17:45:00	0.335
2018-01-13 18:00:00	0.338
2018-01-13 18:15:00	0.338
2018-01-13 18:30:00	0.338
2018-01-13 18:45:00	0.335
2018-01-13 19:00:00	0.342
2018-01-13 19:15:00	0.342
2018-01-13 19:30:00	0.335
2018-01-13 19:45:00	0.335
2018-01-13 20:00:00	0.335
2018-01-13 20:15:00	0.335
2018-01-13 20:30:00	0.342
2018-01-13 20:45:00	0.335
2018-01-13 21:00:00	0.335
2018-01-13 21:15:00	0.335
2018-01-13 21:30:00	0.332
2018-01-13 21:45:00	0.335
2018-01-13 22:00:00	0.332
2018-01-13 22:15:00	0.332
2018-01-13 22:30:00	0.332
2018-01-13 22:45:00	0.332
2018-01-13 23:00:00	0.328
2018-01-13 23:15:00	0.332
2018-01-13 23:30:00	0.328
2018-01-13 23:45:00	0.328
2018-01-14	0.328
2018-01-14 00:15:00	0.328
2018-01-14 00:30:00	0.328
2018-01-14 00:45:00	0.328
2018-01-14 01:00:00	0.328
2018-01-14 01:15:00	0.328
2018-01-14 01:30:00	0.328
2018-01-14 01:45:00	0.328
2018-01-14 02:00:00	0.328
2018-01-14 02:15:00	0.322
2018-01-14 02:30:00	0.325
2018-01-14 02:45:00	0.325
2018-01-14 03:00:00	0.325
2018-01-14 03:15:00	0.322
2018-01-14 03:30:00	0.322
2018-01-14 03:45:00	0.322
2018-01-14 04:00:00	0.322
2018-01-14 04:15:00	0.325
2018-01-14 04:30:00	0.322
2018-01-14 04:45:00	0.322
2018-01-14 05:00:00	0.322
2018-01-14 05:15:00	0.322
2018-01-14 05:30:00	0.319
2018-01-14 05:45:00	0.319
2018-01-14 06:00:00	0.319
2018-01-14 06:15:00	0.319
2018-01-14 06:30:00	0.319
2018-01-14 06:45:00	0.319
2018-01-14 07:00:00	0.316
2018-01-14 07:15:00	0.316
2018-01-14 07:30:00	0.316
2018-01-14 07:45:00	0.316
2018-01-14 08:00:00	0.316
2018-01-14 08:15:00	0.312
2018-01-14 08:30:00	0.316
2018-01-14 08:45:00	0.312
2018-01-14 09:00:00	0.316
2018-01-14 09:15:00	0.316
2018-01-14 09:30:00	0.312
2018-01-14 09:45:00	0.316
2018-01-14 10:00:00	0.316
2018-01-14 10:15:00	0.312
2018-01-14 10:30:00	0.316
2018-01-14 10:45:00	0.316
2018-01-14 11:00:00	0.312
2018-01-14 11:15:00	0.312
2018-01-14 11:30:00	0.312
2018-01-14 11:45:00	0.312
2018-01-14 12:00:00	0.312
2018-01-14 12:15:00	0.309
2018-01-14 12:30:00	0.312
2018-01-14 12:45:00	0.309
2018-01-14 13:00:00	0.309
2018-01-14 13:15:00	0.309
2018-01-14 13:30:00	0.309
2018-01-14 13:45:00	0.312
2018-01-14 14:00:00	0.309
2018-01-14 14:15:00	0.309
2018-01-14 14:30:00	0.312
2018-01-14 14:45:00	0.309
2018-01-14 15:00:00	0.309
2018-01-14 15:15:00	0.306
2018-01-14 15:30:00	0.306
2018-01-14 15:45:00	0.306
2018-01-14 16:00:00	0.309
2018-01-14 16:15:00	0.306
2018-01-14 16:30:00	0.306
2018-01-14 16:45:00	0.306
2018-01-14 17:00:00	0.306
2018-01-14 17:15:00	0.306
2018-01-14 17:30:00	0.303
2018-01-14 17:45:00	0.303
2018-01-14 18:00:00	0.306
2018-01-14 18:15:00	0.303
2018-01-14 18:30:00	0.303
2018-01-14 18:45:00	0.3
2018-01-14 19:00:00	0.303
2018-01-14 19:15:00	0.303
2018-01-14 19:30:00	0.3
2018-01-14 19:45:00	0.3
2018-01-14 20:00:00	0.297
2018-01-14 20:15:00	0.303
2018-01-14 20:30:00	0.3
2018-01-14 20:45:00	0.3
2018-01-14 21:00:00	0.3
2018-01-14 21:15:00	0.3
2018-01-14 21:30:00	0.3
2018-01-14 21:45:00	0.3
2018-01-14 22:00:00	0.297
2018-01-14 22:15:00	0.297
2018-01-14 22:30:00	0.293
2018-01-14 22:45:00	0.293
2018-01-14 23:00:00	0.293
2018-01-14 23:15:00	0.293
2018-01-14 23:30:00	0.293
2018-01-14 23:45:00	0.293
2018-01-15	0.293
2018-01-15 00:15:00	0.293
2018-01-15 00:30:00	0.293
2018-01-15 00:45:00	0.293
2018-01-15 01:00:00	0.293
2018-01-15 01:15:00	0.29
2018-01-15 01:30:00	0.293
2018-01-15 01:45:00	0.29
2018-01-15 02:00:00	0.29
2018-01-15 02:15:00	0.287
2018-01-15 02:30:00	0.29
2018-01-15 02:45:00	0.29
2018-01-15 03:00:00	0.29
2018-01-15 03:15:00	0.29
2018-01-15 03:30:00	0.29
2018-01-15 03:45:00	0.287
2018-01-15 04:00:00	0.287
2018-01-15 04:15:00	0.29
2018-01-15 04:30:00	0.287
2018-01-15 04:45:00	0.287
2018-01-15 05:00:00	0.287
2018-01-15 05:15:00	0.287
2018-01-15 05:30:00	0.284
2018-01-15 05:45:00	0.287
2018-01-15 06:00:00	0.29
2018-01-15 06:15:00	0.287
2018-01-15 06:30:00	0.287
2018-01-15 06:45:00	0.287
2018-01-15 07:00:00	0.284
2018-01-15 07:15:00	0.287
2018-01-15 07:30:00	0.284
2018-01-15 07:45:00	0.284
2018-01-15 08:00:00	0.287
2018-01-15 08:15:00	0.281
2018-01-15 08:30:00	0.287
2018-01-15 08:45:00	0.281
2018-01-15 09:00:00	0.284
2018-01-15 09:15:00	0.284
2018-01-15 09:30:00	0.287
2018-01-15 09:45:00	0.287
2018-01-15 10:00:00	0.287
2018-01-15 10:15:00	0.284
2018-01-15 10:30:00	0.287
2018-01-15 10:45:00	0.287
2018-01-15 11:00:00	0.287
2018-01-15 11:15:00	0.29
2018-01-15 11:30:00	0.29
2018-01-15 11:45:00	0.29
2018-01-15 12:00:00	0.293
2018-01-15 12:15:00	0.293
2018-01-15 12:30:00	0.297
2018-01-15 12:45:00	0.297
2018-01-15 13:00:00	0.3
2018-01-15 13:15:00	0.303
2018-01-15 13:30:00	0.306
2018-01-15 13:45:00	0.303
2018-01-15 14:00:00	0.303
2018-01-15 14:15:00	0.303
2018-01-15 14:30:00	0.303
2018-01-15 14:45:00	0.303
2018-01-15 15:00:00	0.306
2018-01-15 15:15:00	0.306
2018-01-15 15:30:00	0.309
2018-01-15 15:45:00	0.306
2018-01-15 16:00:00	0.309
2018-01-15 16:15:00	0.312
2018-01-15 16:30:00	0.309
2018-01-15 16:45:00	0.316
2018-01-15 17:00:00	0.319
2018-01-15 17:15:00	0.322
2018-01-15 17:30:00	0.345
2018-01-15 17:45:00	0.358
2018-01-15 18:00:00	0.379
2018-01-15 18:15:00	0.4
2018-01-15 18:30:00	0.426
2018-01-15 18:45:00	0.445
2018-01-15 19:00:00	0.471
2018-01-15 19:15:00	0.483
2018-01-15 19:30:00	0.523
2018-01-15 19:45:00	0.564
2018-01-15 20:00:00	0.599
2018-01-15 20:15:00	0.675
2018-01-15 20:30:00	0.702
2018-01-15 20:45:00	0.707
2018-01-15 21:00:00	0.726
2018-01-15 21:15:00	0.76
2018-01-15 21:30:00	0.74
2018-01-15 21:45:00	0.76
2018-01-15 22:00:00	0.755
2018-01-15 22:15:00	0.764
2018-01-15 22:30:00	0.779
2018-01-15 22:45:00	0.764
2018-01-15 23:00:00	0.75
2018-01-15 23:15:00	0.755
2018-01-15 23:30:00	0.764
2018-01-15 23:45:00	0.726
2018-01-16	0.702
2018-01-16 00:15:00	0.707
2018-01-16 00:30:00	0.688
2018-01-16 00:45:00	0.675
2018-01-16 01:00:00	0.652
2018-01-16 01:15:00	0.652
2018-01-16 01:30:00	0.629
2018-01-16 01:45:00	0.616
2018-01-16 02:00:00	0.616
2018-01-16 02:15:00	0.616
2018-01-16 02:30:00	0.612
2018-01-16 02:45:00	0.638
2018-01-16 03:00:00	0.625
2018-01-16 03:15:00	0.603
2018-01-16 03:30:00	0.59
2018-01-16 03:45:00	0.586
2018-01-16 04:00:00	0.577
2018-01-16 04:15:00	0.564
2018-01-16 04:30:00	0.556
2018-01-16 04:45:00	0.564
2018-01-16 05:00:00	0.56
2018-01-16 05:15:00	0.552
2018-01-16 05:30:00	0.548
2018-01-16 05:45:00	0.548
2018-01-16 06:00:00	0.548
2018-01-16 06:15:00	0.56
2018-01-16 06:30:00	0.552
2018-01-16 06:45:00	0.543
2018-01-16 07:00:00	0.539
2018-01-16 07:15:00	0.535
2018-01-16 07:30:00	0.531
2018-01-16 07:45:00	0.527
2018-01-16 08:00:00	0.527
2018-01-16 08:15:00	0.523
2018-01-16 08:30:00	0.531
2018-01-16 08:45:00	0.539
2018-01-16 09:00:00	0.539
2018-01-16 09:15:00	0.535
2018-01-16 09:30:00	0.548
2018-01-16 09:45:00	0.564
2018-01-16 10:00:00	0.616
2018-01-16 10:15:00	0.656
2018-01-16 10:30:00	0.621
2018-01-16 10:45:00	0.621
2018-01-16 11:00:00	0.603
2018-01-16 11:15:00	0.607
2018-01-16 11:30:00	0.603
2018-01-16 11:45:00	0.67
2018-01-16 12:00:00	0.67
2018-01-16 12:15:00	0.652
2018-01-16 12:30:00	0.643
2018-01-16 12:45:00	0.629
2018-01-16 13:00:00	0.625
2018-01-16 13:15:00	0.616
2018-01-16 13:30:00	0.612
2018-01-16 13:45:00	0.607
2018-01-16 14:00:00	0.603
2018-01-16 14:15:00	0.594
2018-01-16 14:30:00	0.599
2018-01-16 14:45:00	0.599
2018-01-16 15:00:00	0.599
2018-01-16 15:15:00	0.59
2018-01-16 15:30:00	0.59
2018-01-16 15:45:00	0.59
2018-01-16 16:00:00	0.594
2018-01-16 16:15:00	0.59
2018-01-16 16:30:00	0.594
2018-01-16 16:45:00	0.586
2018-01-16 17:00:00	0.59
2018-01-16 17:15:00	0.59
2018-01-16 17:30:00	0.59
2018-01-16 17:45:00	0.59
2018-01-16 18:00:00	0.594
2018-01-16 18:15:00	0.59
2018-01-16 18:30:00	0.59
2018-01-16 18:45:00	0.603
2018-01-16 19:00:00	0.603
2018-01-16 19:15:00	0.603
2018-01-16 19:30:00	0.607
2018-01-16 19:45:00	0.603
2018-01-16 20:00:00	0.621
2018-01-16 20:15:00	0.616
2018-01-16 20:30:00	0.616
2018-01-16 20:45:00	0.625
2018-01-16 21:00:00	0.625
2018-01-16 21:15:00	0.621
2018-01-16 21:30:00	0.634
2018-01-16 21:45:00	0.629
2018-01-16 22:00:00	0.629
2018-01-16 22:15:00	0.647
2018-01-16 22:30:00	0.643
2018-01-16 22:45:00	0.652
2018-01-16 23:00:00	0.661
2018-01-16 23:15:00	0.665
2018-01-16 23:30:00	0.675
2018-01-16 23:45:00	0.688
2018-01-17	0.684
2018-01-17 00:15:00	0.688
2018-01-17 00:30:00	0.698
2018-01-17 00:45:00	0.712
2018-01-17 01:00:00	0.716
2018-01-17 01:15:00	0.726
2018-01-17 01:30:00	0.721
2018-01-17 01:45:00	0.731
2018-01-17 02:00:00	0.731
2018-01-17 02:15:00	0.74
2018-01-17 02:30:00	0.745
2018-01-17 02:45:00	0.75
2018-01-17 03:00:00	0.755
2018-01-17 03:15:00	0.755
2018-01-17 03:30:00	0.75
2018-01-17 03:45:00	0.75
2018-01-17 04:00:00	0.76
2018-01-17 04:15:00	0.76
2018-01-17 04:30:00	0.76
2018-01-17 04:45:00	0.76
2018-01-17 05:00:00	0.764
2018-01-17 05:15:00	0.764
2018-01-17 05:30:00	0.774
2018-01-17 05:45:00	0.774
2018-01-17 06:00:00	0.784
2018-01-17 06:15:00	0.779
2018-01-17 06:30:00	0.794
2018-01-17 06:45:00	0.789
2018-01-17 07:00:00	0.784
2018-01-17 07:15:00	0.784
2018-01-17 07:30:00	0.804
2018-01-17 07:45:00	0.799
2018-01-17 08:00:00	0.804
2018-01-17 08:15:00	0.799
2018-01-17 08:30:00	0.789
2018-01-17 08:45:00	0.799
2018-01-17 09:00:00	0.804
2018-01-17 09:15:00	0.799
2018-01-17 09:30:00	0.799
2018-01-17 09:45:00	0.799
2018-01-17 10:00:00	0.809
2018-01-17 10:15:00	0.804
2018-01-17 10:30:00	0.814
2018-01-17 10:45:00	0.809
2018-01-17 11:00:00	0.819
2018-01-17 11:15:00	0.809
2018-01-17 11:30:00	0.829
2018-01-17 11:45:00	0.829
2018-01-17 12:00:00	0.819
2018-01-17 12:15:00	0.819
2018-01-17 12:30:00	0.824
2018-01-17 12:45:00	0.814
2018-01-17 13:00:00	0.829
2018-01-17 13:15:00	0.824
2018-01-17 13:30:00	0.824
2018-01-17 13:45:00	0.834
2018-01-17 14:00:00	0.834
2018-01-17 14:15:00	0.829
2018-01-17 14:30:00	0.839
2018-01-17 14:45:00	0.829
2018-01-17 15:00:00	0.839
2018-01-17 15:15:00	0.839
2018-01-17 15:30:00	0.844
2018-01-17 15:45:00	0.844
2018-01-17 16:00:00	0.839
2018-01-17 16:15:00	0.839
2018-01-17 16:30:00	0.839
2018-01-17 16:45:00	0.834
2018-01-17 17:00:00	0.829
2018-01-17 17:15:00	0.844
2018-01-17 17:30:00	0.834
2018-01-17 17:45:00	0.839
2018-01-17 18:00:00	0.829
2018-01-17 18:15:00	0.834
2018-01-17 18:30:00	0.839
2018-01-17 18:45:00	0.834
2018-01-17 19:00:00	0.824
2018-01-17 19:15:00	0.834
2018-01-17 19:30:00	0.829
2018-01-17 19:45:00	0.829
2018-01-17 20:00:00	0.834
2018-01-17 20:15:00	0.844
2018-01-17 20:30:00	0.834
2018-01-17 20:45:00	0.844
2018-01-17 21:00:00	0.834
2018-01-17 21:15:00	0.849
2018-01-17 21:30:00	0.829
2018-01-17 21:45:00	0.834
2018-01-17 22:00:00	0.839
2018-01-17 22:15:00	0.834
2018-01-17 22:30:00	0.834
2018-01-17 22:45:00	0.839
2018-01-17 23:00:00	0.834
2018-01-17 23:15:00	0.849
2018-01-17 23:30:00	0.849
2018-01-17 23:45:00	0.849
2018-01-18	0.844
2018-01-18 00:15:00	0.855
2018-01-18 00:30:00	0.855
2018-01-18 00:45:00	0.865
2018-01-18 01:00:00	0.855
2018-01-18 01:15:00	0.87
2018-01-18 01:30:00	0.865
2018-01-18 01:45:00	0.855
2018-01-18 02:00:00	0.865
2018-01-18 02:15:00	0.87
2018-01-18 02:30:00	0.87
2018-01-18 02:45:00	0.875
2018-01-18 03:00:00	0.87
2018-01-18 03:15:00	0.875
2018-01-18 03:30:00	0.87
2018-01-18 03:45:00	0.87
2018-01-18 04:00:00	0.875
2018-01-18 04:15:00	0.896
2018-01-18 04:30:00	0.924
2018-01-18 04:45:00	0.954
2018-01-18 05:00:00	1023
2018-01-18 05:15:00	1054
2018-01-18 05:30:00	1054
2018-01-18 05:45:00	1.07
2018-01-18 06:00:00	1.07
2018-01-18 06:15:00	1078
2018-01-18 06:30:00	1086
2018-01-18 06:45:00	1094
2018-01-18 07:00:00	1.11
2018-01-18 07:15:00	1118
2018-01-18 07:30:00	1.11
2018-01-18 07:45:00	1.11
2018-01-18 08:00:00	1102
2018-01-18 08:15:00	1078
2018-01-18 08:30:00	1086
2018-01-18 08:45:00	1.07
2018-01-18 09:00:00	1102
2018-01-18 09:15:00	1126
2018-01-18 09:30:00	1174
2018-01-18 09:45:00	1158
2018-01-18 10:00:00	1134
2018-01-18 10:15:00	1134
2018-01-18 10:30:00	1094
2018-01-18 10:45:00	1.11
2018-01-18 11:00:00	1086
2018-01-18 11:15:00	1086
2018-01-18 11:30:00	1.07
2018-01-18 11:45:00	1046
2018-01-18 12:00:00	1.07
2018-01-18 12:15:00	1039
2018-01-18 12:30:00	1031
2018-01-18 12:45:00	1054
2018-01-18 13:00:00	1031
2018-01-18 13:15:00	1023
2018-01-18 00:13:30
2018-01-18 13:45:00	1007
2018-01-18 00:14:00
2018-01-18 00:14:15
2018-01-18 14:30:00	0.992
2018-01-18 00:14:45
2018-01-18 15:00:00	0.984
2018-01-18 15:15:00	0.992
2018-01-18 15:30:00	0.977
2018-01-18 15:45:00	0.969
2018-01-18 16:00:00	0.984
2018-01-18 16:15:00	0.961
2018-01-18 16:30:00	0.961
2018-01-18 16:45:00	0.961
2018-01-18 17:00:00	0.961
2018-01-18 17:15:00	0.969
2018-01-18 17:30:00	0.961
2018-01-18 17:45:00	0.954
2018-01-18 18:00:00	0.969
2018-01-18 18:15:00	0.969
2018-01-18 18:30:00	0.961
2018-01-18 18:45:00	0.961
2018-01-18 19:00:00	0.946
2018-01-18 19:15:00	0.984
2018-01-18 19:30:00	0.961
2018-01-18 19:45:00	0.984
2018-01-18 20:00:00	0.984
2018-01-18 20:15:00	0.984
2018-01-18 20:30:00	0.977
2018-01-18 20:45:00	0.977
2018-01-18 21:00:00	0.984
2018-01-18 21:15:00	0.984
2018-01-18 21:30:00	0.992
2018-01-18 21:45:00	1023
2018-01-18 22:00:00	1023
2018-01-18 22:15:00	1031
2018-01-18 22:30:00	1.07
2018-01-18 22:45:00	1158
2018-01-18 23:00:00	1.19
2018-01-18 23:15:00	1.19
2018-01-18 23:30:00	1158
2018-01-18 23:45:00	1134
2018-01-19	1.15
2018-01-19 00:15:00	1182
2018-01-19 00:30:00	1207
2018-01-19 00:45:00	1158
2018-01-19 01:00:00	1.19
2018-01-19 01:15:00	1166
2018-01-19 01:30:00	1.15
2018-01-19 01:45:00	1134
2018-01-19 02:00:00	1142
2018-01-19 02:15:00	1.15
2018-01-19 02:30:00	1126
2018-01-19 02:45:00	1.11
2018-01-19 03:00:00	1134
2018-01-19 03:15:00	1142
2018-01-19 03:30:00	1158
2018-01-19 03:45:00	1142
2018-01-19 04:00:00	1134
2018-01-19 04:15:00	1.15
2018-01-19 04:30:00	1142
2018-01-19 04:45:00	1166
2018-01-19 05:00:00	1.15
2018-01-19 05:15:00	1158
2018-01-19 05:30:00	1166
2018-01-19 05:45:00	1182
2018-01-19 06:00:00	1158
2018-01-19 06:15:00	1158
2018-01-19 06:30:00	1.15
2018-01-19 06:45:00	1166
2018-01-19 07:00:00	1166
2018-01-19 07:15:00	1158
2018-01-19 07:30:00	1158
2018-01-19 07:45:00	1199
2018-01-19 08:00:00	1166
2018-01-19 08:15:00	1158
2018-01-19 08:30:00	1166
2018-01-19 08:45:00	1166
2018-01-19 09:00:00	1.15
2018-01-19 09:15:00	1174
2018-01-19 09:30:00	1174
2018-01-19 09:45:00	1.19
2018-01-19 10:00:00	1174
2018-01-19 10:15:00	1166
2018-01-19 10:30:00	1174
2018-01-19 10:45:00	1182
2018-01-19 11:00:00	1182
2018-01-19 11:15:00	1166
2018-01-19 11:30:00	1182
2018-01-19 11:45:00	1158
2018-01-19 12:00:00	1199
2018-01-19 12:15:00	1182
2018-01-19 12:30:00	1174
2018-01-19 12:45:00	1.19
2018-01-19 13:00:00	1182
2018-01-19 13:15:00	1182
2018-01-19 13:30:00	1174
2018-01-19 13:45:00	1207
2018-01-19 14:00:00	1174
2018-01-19 14:15:00	1207
2018-01-19 14:30:00	1.19
2018-01-19 14:45:00	1182
2018-01-19 15:00:00	1166
2018-01-19 15:15:00	1174
2018-01-19 15:30:00	1174
2018-01-19 15:45:00	1199
2018-01-19 16:00:00	1.19
2018-01-19 16:15:00	1174
2018-01-19 16:30:00	1199
2018-01-19 16:45:00	1182
2018-01-19 17:00:00	1174
2018-01-19 17:15:00	1.19
2018-01-19 17:30:00	1166
2018-01-19 17:45:00	1174
2018-01-19 18:00:00	1223
2018-01-19 18:15:00	1166
2018-01-19 18:30:00	1174
2018-01-19 18:45:00	1.19
2018-01-19 19:00:00	1174
2018-01-19 19:15:00	1174
2018-01-19 19:30:00	1199
2018-01-19 19:45:00	1.19
2018-01-19 20:00:00	1182
2018-01-19 20:15:00	1174
2018-01-19 20:30:00	1166
2018-01-19 20:45:00	1174
2018-01-19 21:00:00	1174
2018-01-19 21:15:00	1182
2018-01-19 21:30:00	1174
2018-01-19 21:45:00	1199
2018-01-19 22:00:00	1.19
2018-01-19 22:15:00	1166
2018-01-19 22:30:00	1.15
2018-01-19 22:45:00	1174
2018-01-19 23:00:00	1174
2018-01-19 23:15:00	1182
2018-01-19 23:30:00	1182
2018-01-19 23:45:00	1182
2018-01-20	1199
2018-01-20 00:15:00	1182
2018-01-20 00:30:00	1199
2018-01-20 00:45:00	1.19
2018-01-20 01:00:00	1.19
2018-01-20 01:15:00	1.19
2018-01-20 01:30:00	1174
2018-01-20 01:45:00	1174
2018-01-20 02:00:00	1166
2018-01-20 02:15:00	1.15
2018-01-20 02:30:00	1158
2018-01-20 02:45:00	1166
2018-01-20 03:00:00	1142
2018-01-20 03:15:00	1158
2018-01-20 03:30:00	1174
2018-01-20 03:45:00	1166
2018-01-20 04:00:00	1.15
2018-01-20 04:15:00	1.15
2018-01-20 04:30:00	1142
2018-01-20 04:45:00	1166
2018-01-20 05:00:00	1174
2018-01-20 05:15:00	1158
2018-01-20 05:30:00	1.15
2018-01-20 05:45:00	1158
2018-01-20 06:00:00	1134
2018-01-20 06:15:00	1.15
2018-01-20 06:30:00	1142
2018-01-20 06:45:00	1134
2018-01-20 07:00:00	1126
2018-01-20 07:15:00	1142
2018-01-20 07:30:00	1158
2018-01-20 07:45:00	1134
2018-01-20 08:00:00	1134
2018-01-20 08:15:00	1142
2018-01-20 08:30:00	1118
2018-01-20 08:45:00	1118
2018-01-20 09:00:00	1118
2018-01-20 09:15:00	1.11
2018-01-20 09:30:00	1126
2018-01-20 09:45:00	1118
2018-01-20 10:00:00	1102
2018-01-20 10:15:00	1126
2018-01-20 10:30:00	1.11
2018-01-20 10:45:00	1118
2018-01-20 11:00:00	1142
2018-01-20 11:15:00	1.15
2018-01-20 11:30:00	1134
2018-01-20 11:45:00	1134
2018-01-20 12:00:00	1118
2018-01-20 12:15:00	1134
2018-01-20 12:30:00	1118
2018-01-20 12:45:00	1142
2018-01-20 13:00:00	1142
2018-01-20 13:15:00	1126
2018-01-20 13:30:00	1134
2018-01-20 13:45:00	1158
2018-01-20 14:00:00	1158
2018-01-20 14:15:00	1142
2018-01-20 14:30:00	1158
2018-01-20 14:45:00	1142
2018-01-20 15:00:00	1158
2018-01-20 15:15:00	1.15
2018-01-20 15:30:00	1.15
2018-01-20 15:45:00	1.15
2018-01-20 16:00:00	1142
2018-01-20 16:15:00	1134
2018-01-20 16:30:00	1126
2018-01-20 16:45:00	1126
2018-01-20 17:00:00	1126
2018-01-20 17:15:00	1126
2018-01-20 17:30:00	1.11
2018-01-20 17:45:00	1118
2018-01-20 18:00:00	1.11
2018-01-20 18:15:00	1118
2018-01-20 18:30:00	1.11
2018-01-20 18:45:00	1102
2018-01-20 19:00:00	1086
2018-01-20 19:15:00	1.11
2018-01-20 19:30:00	1078
2018-01-20 19:45:00	1086
2018-01-20 20:00:00	1094
2018-01-20 20:15:00	1.07
2018-01-20 20:30:00	1.07
2018-01-20 20:45:00	1.07
2018-01-20 21:00:00	1078
2018-01-20 21:15:00	1054
2018-01-20 21:30:00	1046
2018-01-20 21:45:00	1062
2018-01-20 22:00:00	1046
2018-01-20 22:15:00	1054
2018-01-20 22:30:00	1039
2018-01-20 22:45:00	1046
2018-01-20 23:00:00	1039
2018-01-20 23:15:00	1046
2018-01-20 23:30:00	1039
2018-01-20 23:45:00	1023
2018-01-21	1039
2018-01-21 00:15:00	1031
2018-01-21 00:30:00	1031
2018-01-21 00:45:00	1015
2018-01-21 01:00:00	1007
2018-01-21 01:15:00	1015
2018-01-21 01:30:00	1007
2018-01-21 01:45:00	1007
2018-01-21 02:00:00	1015
2018-01-21 02:15:00	1023
2018-01-21 00:02:30
2018-01-21 02:45:00	0.992
2018-01-21 03:00:00	0.984
2018-01-21 03:15:00	0.969
2018-01-21 03:30:00	0.992
2018-01-21 03:45:00	0.984
2018-01-21 04:00:00	0.961
2018-01-21 04:15:00	0.961
2018-01-21 04:30:00	0.992
2018-01-21 04:45:00	0.954
2018-01-21 05:00:00	0.939
2018-01-21 05:15:00	0.961
2018-01-21 05:30:00	0.946
2018-01-21 05:45:00	0.939
2018-01-21 06:00:00	0.954
2018-01-21 06:15:00	0.969
2018-01-21 06:30:00	0.939
2018-01-21 06:45:00	0.946
2018-01-21 07:00:00	0.931
2018-01-21 07:15:00	0.931
2018-01-21 07:30:00	0.924
2018-01-21 07:45:00	0.901
2018-01-21 08:00:00	0.901
2018-01-21 08:15:00	0.901
2018-01-21 08:30:00	0.891
2018-01-21 08:45:00	0.901
2018-01-21 09:00:00	0.886
2018-01-21 09:15:00	0.886
2018-01-21 09:30:00	0.891
2018-01-21 09:45:00	0.891
2018-01-21 10:00:00	0.88
2018-01-21 10:15:00	0.886
2018-01-21 10:30:00	0.875
2018-01-21 10:45:00	0.87
2018-01-21 11:00:00	0.875
2018-01-21 11:15:00	0.87
2018-01-21 11:30:00	0.87
2018-01-21 11:45:00	0.87
2018-01-21 12:00:00	0.875
2018-01-21 12:15:00	0.87
2018-01-21 12:30:00	0.865
2018-01-21 12:45:00	0.87
2018-01-21 13:00:00	0.875
2018-01-21 13:15:00	0.86
2018-01-21 13:30:00	0.86
2018-01-21 13:45:00	0.865
2018-01-21 14:00:00	0.865
2018-01-21 14:15:00	0.855
2018-01-21 14:30:00	0.86
2018-01-21 14:45:00	0.86
2018-01-21 15:00:00	0.86
2018-01-21 15:15:00	0.86
2018-01-21 15:30:00	0.849
2018-01-21 15:45:00	0.855
2018-01-21 16:00:00	0.86
2018-01-21 16:15:00	0.849
2018-01-21 16:30:00	0.855
2018-01-21 16:45:00	0.855
2018-01-21 17:00:00	0.849
2018-01-21 17:15:00	0.849
2018-01-21 17:30:00	0.839
2018-01-21 17:45:00	0.844
2018-01-21 18:00:00	0.839
2018-01-21 18:15:00	0.834
2018-01-21 18:30:00	0.839
2018-01-21 18:45:00	0.839
2018-01-21 19:00:00	0.834
2018-01-21 19:15:00	0.819
2018-01-21 19:30:00	0.829
[truncated: 33,042 more rows]

## Sheet: SSC
DATE	SSC_mgL
2018-10-31 13:55:00	2.2
2018-10-31 22:40:00	2
2018-11-02 11:30:00	4.7
2018-11-02 20:00:00	2.7
2018-11-03 08:00:00	9.7
2018-11-03 23:00:00	5.1
2018-11-04 14:00:00	2.6
2018-11-05 02:00:00	1.6
2018-11-05 11:00:00	3.8
2018-11-09 17:30:00	1.4
2018-11-10 13:40:00	15
2018-11-10 16:40:00	13.7
2018-11-10 19:40:00	44.7
2018-11-10 22:40:00	167.9
2018-11-11 01:40:00	279.7
2018-11-11 04:40:00	15.1
2018-11-11 07:40:00	9.4
2018-11-11 10:40:00	5.1
2018-11-11 13:40:00	5
2018-11-11 16:40:00	7.5
2018-11-11 19:40:00	13.5
2018-11-11 22:40:00	53.1
2018-11-12 04:38:00	11.6
2018-11-12 10:38:00	4.3
2018-11-12 16:38:00	3.6
2018-11-12 22:38:00	4.2
2018-12-07 16:00:00	2926
2018-12-07 18:00:00	1656
2018-12-07 20:00:00	905
2018-12-08	364.3
2018-12-08 04:00:00	339.9
2018-12-08 08:00:00	149.5
2018-12-08 12:00:00	166.2
2018-12-08 16:00:00	201.4
2018-12-08 20:00:00	582.9
2018-12-09	1359
2018-12-09 04:00:00	1614
2018-12-09 08:00:00	2698.3
2018-12-09 12:00:00	2341
2018-12-09 17:00:00	1402
2018-12-09 23:00:00	2622
2018-12-10 05:00:00	2727
2018-12-10 11:00:00	3160
2018-12-10 17:00:00	1087
2018-12-10 23:00:00	2644
2018-12-11 05:00:00	1287
2018-12-11 11:00:00	2186
2018-12-11 17:00:00	1113
2018-12-11 23:00:00	421
2018-12-12 05:00:00	1069
2018-12-12 11:00:00	112

## Sheet: PSD automatic
	Particle size (µm)
DATE	1.21	1.60	1.89	2.23	2.63	3.11	3.67	4.33	5.11	6.03	7.11	8.39	9.90	11.7	13.8	16.3	19.2	22.7	26.7	31.6	37.2	43.9	51.9	61.2	72.2	85.2	101	119	140	165	195	230	273	324	386	459	Raw trans-mission (mW)	Supply (V)	Analog input 1 (mV)	Laser ref-erence (mW)	Depth (m)	Temper-ature (C)	Year	Month	Day	Hour	Minute	Second	Analog input 2 (V)
2018-10-30 19:55:00	0	0	0	0	0	0	0.00317377	0.0190761	0.116214	0.591349	116654	120148	124555	156854	185273	236696	253979	299374	278862	29525	311913	3488	43558	525559	465723	361451	248527	15896	101127	0.678631	0.489007	0.358098	0.234246	0.114262	0.0362858	0.00708196	0.878098	11.83	0.0647	106482	-0.23	21.56	2018	11	9	9	24	13	0.078
2018-10-30 19:55:00	0	0	0	0	0	0.00116031	0.00465979	0.0250798	0.141935	0.663265	118036	113892	114218	143632	175629	234998	265456	32377	304992	316023	326756	346756	403795	445704	360886	253887	152253	0.783337	0.350842	0.143112	0.0544559	0.0197413	0.00654542	0.00199588	0	0	0.892432	11.94	0.0689	107008	-0.23	21.56	2018	11	9	9	24	14	0.0793
2018-10-30 19:54:59	0	0	0	0	0	0	0.00334795	0.0189357	0.111867	0.556272	110057	114676	120189	151429	178803	228183	247862	29734	283874	304789	32672	360292	4288	470151	369682	249983	144072	0.702129	0.289591	0.103956	0.034316	0.0110111	0.00363482	0.00129432	0	0	0.908274	11.83	0.069	106707	-0.22	21.56	2018	11	9	9	24	15	0.0793
2018-10-30 19:54:59	0	0	0	0	0	0	0.00341137	0.0200904	0.121618	0.611448	118377	118592	120085	147959	173606	225177	25019	30558	293179	311196	329707	356794	418854	46631	385489	285153	185281	103862	0.495805	0.206906	0.0799511	0.0313014	0.0130984	0.0060287	0.00284345	0.0010529	0.896203	11.75	0.069	106933	-0.22	21.56	2018	11	9	9	24	16	0.0793
2018-10-30 19:54:59	0	0	0	0	0	0	0.00230606	0.0147828	0.0942158	0.508504	108536	118766	127511	16325	193752	248912	2711	319983	29614	303338	309908	325026	371395	42552	388658	340773	278062	201187	125448	0.66956	0.317314	0.13939	0.0583993	0.0238436	0.00888431	0.00245829	0.896203	11.93	0.069	106933	-0.22	21.56	2018	11	9	9	24	17	0.0793
2018-10-30 19:54:59	0	0	0	0	0	0	0.00326653	0.0189126	0.11413	0.578197	11342	11756	121005	149777	173281	219576	239954	29053	278785	297048	316015	339565	391816	416882	322972	222316	137071	0.765459	0.389916	0.183413	0.0806834	0.0336771	0.0130951	0.00474272	0.00154417	0	0.902993	11.83	0.069	107234	-0.23	21.56	2018	11	9	9	24	18	0.0793
2018-10-30 19:54:59	0	0	0	0	0	0.00102932	0.00401334	0.0213631	0.123917	0.59915	112965	113415	116639	147225	176525	228594	248399	294935	274123	287712	301255	33406	41128	49204	443195	362766	268396	180703	111052	0.636059	0.345313	0.183975	0.0937336	0.0426969	0.0151814	0.00394389	0.90073	11.75	0.069	107083	-0.23	21.56	2018	11	9	9	24	19	0.0793
2018-10-30 19:54:59	0	0	0	0	0	0	0.00389189	0.0208164	0.118641	0.568727	108801	11194	115958	145338	172369	222099	244003	2.92	274803	282482	289646	303347	34683	399671	36867	322581	256827	18007	111917	0.657088	0.393701	0.255158	0.172321	0.107877	0.0508846	0.0143539	0.906765	11.94	0.069	107234	-0.23	21.56	2018	11	9	9	24	20	0.0794
2018-10-30 19:54:59	0	0	0	0	0	0.00106838	0.00410272	0.0215065	0.122142	0.581547	109377	112198	116756	148311	178884	232657	255791	305939	286649	296856	306772	327336	382468	425441	349369	251508	157973	0.877998	0.440774	0.205136	0.0899997	0.0378422	0.0149585	0.00549338	0.00177575	0	0.905256	11.83	0.069	107309	-0.23	21.56	2018	11	9	9	24	21	0.0793
2018-10-30 19:54:59	0	0	0	0	0	0.00120853	0.00459617	0.0237806	0.132801	0.619136	11376	112768	114064	141472	168874	219506	242151	289552	271042	284047	297089	322303	380253	41901	34139	251963	172055	111841	0.704179	0.430076	0.249797	0.137337	0.0697141	0.0315972	0.0115842	0.00289611	0.907519	11.75	0.069	10776	-0.23	21.56	2018	11	9	9	24	22	0.0794
2018-10-30 19:54:59	0	0	0	0	0	0	0.00326373	0.0191778	0.114963	0.578493	114863	119408	124811	15646	18175	227599	242522	288458	275461	299728	325672	364348	439803	487228	388513	270786	16575	0.898495	0.434473	0.190561	0.0766429	0.0285833	0.0100961	0.00361401	0.00131631	0	0.896203	11.95	0.069	107835	-0.23	21563	2018	11	9	9	24	23	0.0794
2018-10-30 19:54:59	0	0	0	0	0	0.00114474	0.00430493	0.0224883	0.125481	0.588544	109954	112518	11604	143611	168294	214816	236316	2875	279297	303766	329893	371832	457748	510568	390143	236206	109645	0.387289	0.105599	0.0228954	0.00412853	0	0	0	0	0	0.902238	11.83	0.069	107309	-0.22	21565	2018	11	9	9	24	24	0.0793
2018-10-30 19:54:59	0	0	0	0	0	0	0.00329315	0.0187642	0.110227	0.546574	108423	11367	118806	148287	173379	220471	238924	284213	268719	285558	302818	33982	422222	506445	448391	343405	219296	113343	0.470084	0.159279	0.0465423	0.0127259	0.00349659	0.00103761	0	0	0.912045	11.75	0.069	107384	-0.23	21567	2018	11	9	9	24	25	0.0794
2018-10-30 19:54:59	0	0	0	0	0	0.00115361	0.00450667	0.0234437	0.130723	0.613526	114465	116377	119041	146842	171288	218222	238855	287362	273911	285994	298046	315272	359702	390635	321118	241217	164348	101958	0.588587	0.327243	0.178261	0.0940138	0.0450677	0.0184263	0.0060426	0.00143665	0.905256	11.94	0.069	108061	-0.22	21567	2018	11	9	9	24	26	0.0794
2018-10-30 19:54:59	0	0	0	0	0	0	0.00367232	0.0200646	0.116163	0.564498	109528	112683	117526	147902	175285	226643	250655	305369	293998	309989	326238	348545	40092	432492	34477	24507	154846	0.871473	0.442552	0.20531	0.0869993	0.033628	0.0118074	0.00393275	0.00125575	0	0.912045	11.82	0.069	108061	-0.23	21566	2018	11	9	9	24	27	0.0794
2018-10-30 19:54:59	0	0	0	0	0	0.00133564	0.00473738	0.0228244	0.123242	0.566477	106916	111982	118024	149049	176578	224143	241955	285603	268003	280575	293106	321867	387851	450763	392948	304117	205326	120664	0.628344	0.302728	0.143098	0.0688351	0.0334546	0.0157042	0.00661358	0.00202004	0.902238	11.75	0.069	107535	-0.22	21567	2018	11	9	9	24	28	0.0794
2018-10-30 19:54:59	0	0	0	0	0	0	0.00323789	0.0192055	0.115901	0.584537	114827	117619	121327	151652	1784	228996	250522	30137	284961	301452	318222	350644	425169	493685	424953	326825	224521	140432	0.833224	0.502466	0.325402	0.228922	0.159588	0.0988582	0.0466989	0.0135641	0.904502	11.94	0.069	10761	-0.23	21566	2018	11	9	9	24	29	0.0794
2018-10-30 19:54:59	0	0	0	0	0	0.00149285	0.00551336	0.026628	0.140175	0.617472	108289	106436	10814	135198	161841	209294	229751	276534	264056	283208	30329	336443	404356	437903	330839	20694	10611	0.448739	0.159023	0.0496461	0.0146792	0.00458026	0.00162435	0	0	0	0.919589	11.83	0.069	10761	-0.24	21567	2018	11	9	9	24	30	0.0794
2018-10-30 19:54:59	0	0	0	0	0	0	0.00388359	0.0212132	0.126194	0.626385	119411	119351	120511	147514	170614	216173	23425	28295	271546	295074	320193	361018	443936	49481	383002	247639	134258	0.633206	0.275489	0.119581	0.0545755	0.0270944	0.014237	0.00743393	0.00337259	0.00104339	0.902238	11.75	0.069	107986	-0.23	21566	2018	11	9	9	24	31	0.0794
2018-10-30 19:54:59	0	0	0	0	0	0	0.00296468	0.0175841	0.109538	0.56942	112968	11724	121882	153614	182833	235656	255224	299798	273444	278801	28365	3004	3514	392082	318383	220982	127493	0.608396	0.242006	0.0837433	0.0268782	0.00863626	0.00284657	0	0	0	0.906765	11.95	0.069	107911	-0.22	21566	2018	11	9	9	24	32	0.0794
2018-10-30 19:54:59	0	0	0	0	0	0	0.00267621	0.0168895	0.104411	0.544983	11316	121483	128383	16167	188716	238313	255839	301207	28152	296955	312582	344494	417945	486532	421993	328128	229766	146654	0.863599	0.479761	0.252989	0.123212	0.0514314	0.0179086	0.00510922	0.00110875	0.904502	11.81	0.069	10776	-0.22	21566	2018	11	9	9	24	33	0.0794
2018-10-30 19:54:59	0	0	0	0	0	0	0.00357296	0.0189013	0.111256	0.554012	110286	116654	122922	154072	179106	225149	241379	287111	271999	290062	308778	343751	417367	474968	391598	279934	171621	0.907188	0.421557	0.178617	0.0737764	0.0314179	0.0141698	0.00659283	0.0029381	0	0.913554	11.75	0.069	10776	-0.23	21566	2018	11	9	9	24	34	0.0794
2018-10-30 19:54:59	0	0	0	0	0	0	0.00341812	0.019578	0.117007	0.584426	115072	117238	120624	151534	181425	236068	25914	306573	281083	285985	290216	311867	37498	446524	4032	32588	229779	138131	0.689532	0.282847	0.0960536	0.0286938	0.00810793	0.00240703	0	0	0.908274	11.95	0.069	108136	-0.23	21566	2018	11	9	9	24	35	0.0794
2018-10-30 19:54:59	0	0	0	0	0	0	0.00368317	0.0202909	0.120764	0.598726	115084	115468	117564	146032	172756	223177	244646	293727	27556	291858	30847	346348	431313	511048	440481	331804	213866	115414	0.507904	0.183433	0.055702	0.0152451	0.00396059	0.00103885	0	0	0.909782	11.81	0.069	108211	-0.23	21566	2018	11	9	9	24	36	0.0793
2018-10-30 19:54:59	0	0	0	0	0	0	0.00338273	0.0187262	0.109985	0.547508	108558	115144	120688	150982	1767	225454	246615	296538	283137	301663	320849	350995	41453	454466	362185	250608	149098	0.76645	0.347918	0.141822	0.0524979	0.017979	0.00581412	0.00186741	0	0	0.915063	11.75	0.069	108136	-0.23	21566	2018	11	9	9	24	37	0.0794
2018-10-30 19:54:59	0	0	0	0	0	0	0.00384455	0.021437	0.126782	0.624752	119159	119605	121557	151396	180947	237908	266173	323116	304807	31546	325799	342853	390595	424004	34657	257627	170729	0.992684	0.502314	0.224751	0.0912538	0.0356873	0.0139447	0.00561938	0.00217221	0	0.903747	11.93	0.069	108287	-0.23	21566	2018	11	9	9	24	38	0.0794
2018-10-30 19:54:59	0	0	0	0	0	0	0.00350219	0.0203675	0.119571	0.587355	113193	115235	117968	146339	170475	217337	236709	286742	277886	305199	33463	383003	479996	564105	478112	346717	211061	107076	0.450692	0.157613	0.0476561	0.0134465	0.00383637	0.0011898	0	0	0.909028	11.81	0.069	108587	-0.22	21566	2018	11	9	9	24	39	0.0794
2018-10-30 19:54:59	0	0	0	0	0	0	0.0036022	0.0201387	0.117409	0.577224	113602	118429	123644	154447	179852	227316	246649	296095	28306	302077	321709	358871	442369	530068	473336	368812	239455	123979	0.504021	0.1663	0.0480634	0.013238	0.00385678	0.00132484	0	0	0.901484	11.75	0.069	108362	-0.22	21566	2018	11	9	9	24	40	0.0794
2018-10-30 19:54:59	0	0	0	0	0	0.00109862	0.00420771	0.021639	0.124714	0.597617	110409	110131	112808	143362	17306	223321	239795	281213	25775	268636	279402	308135	377167	435841	364577	266595	170622	0.969287	0.488874	0.220484	0.0910906	0.0369392	0.0154152	0.00681588	0.00292915	0	0.916572	11.93	0.069	108061	-0.22	21566	2018	11	9	9	24	41	0.0794
2018-10-30 19:54:59	0	0	0	0	0	0	0.00284697	0.0174886	0.109548	0.570176	112879	114689	117091	146382	17319	225631	248691	300866	284299	301369	318807	353528	433371	503078	42174	307527	194551	108259	0.540253	0.249594	0.108195	0.0438354	0.0164657	0.00578319	0.00191882	0	0.920344	11.8	0.069	108663	-0.23	21566	2018	11	9	9	24	42	0.0794
2018-10-30 19:54:59	0	0	0	0	0	0	0.00263402	0.0165555	0.103158	0.542801	113437	121639	128156	160008	18603	236503	258202	311175	298701	319945	342059	369778	424999	461952	385196	306275	234036	171293	120746	0.837929	0.584041	0.401043	0.250777	0.129063	0.0477867	0.0104953	0.915817	11.75	0.069	108738	-0.23	21566	2018	11	9	9	24	43	0.0794
2018-10-30 19:54:59	0	0	0	0	0	0	0.00320658	0.0184217	0.110107	0.555108	110701	116086	121623	152284	177659	226272	247279	299875	289275	310797	333335	368061	440351	493452	40381	290154	180953	0.972083	0.447874	0.17779	0.0620986	0.0200555	0.00629943	0.00204511	0	0	0.913554	11.93	0.069	108437	-0.23	21566	2018	11	9	9	24	44	0.0794
2018-10-30 19:54:59	0	0	0	0	0	0	0.00349981	0.0188841	0.108259	0.529446	107084	114332	121373	153591	182392	233403	254783	302597	285192	296804	308129	335735	405716	490472	455606	374147	255223	138383	0.606796	0.228528	0.0805563	0.0281583	0.0102096	0.00395637	0.0015376	0	0.909782	11.8	0.069	108512	-0.23	21566	2018	11	9	9	24	45	0.0794
2018-10-30 19:54:59	0	0	0	0	0	0	0.00381123	0.0208943	0.123369	0.608784	115596	116474	117835	146131	172902	225816	252109	308288	296204	315827	33615	368439	440862	490862	390825	264423	148777	0.695015	0.279195	0.10285	0.036675	0.0130523	0.00467336	0.0017044	0	0	0.909782	11.75	0.069	108512	-0.23	21566	2018	11	9	9	24	46	0.0794
2018-10-30 19:54:59	0	0	0	0	0	0	0.00387782	0.0210093	0.122977	0.601754	114405	117113	120834	151981	179811	229224	246112	289865	269617	283774	297985	331665	413419	510705	476501	394149	275627	156877	0.711392	0.261717	0.0818165	0.0232952	0.00643442	0.00181788	0	0	0.915817	11.93	0.069	108437	-0.22	21566	2018	11	9	9	24	47	0.0794
2018-10-30 19:54:59	0	0	0	0	0	0	0.00320523	0.018685	0.112482	0.566357	110903	11531	120705	152755	18085	229633	244378	283641	2592	271703	284221	313979	381854	444418	386065	303098	212607	132283	0.740831	0.392055	0.210032	0.120075	0.0721082	0.0419286	0.0203322	0.00676689	0.921098	11.8	0.069	108287	-0.23	21566	2018	11	9	9	24	48	0.0794
2018-10-30 19:54:59	0	0	0	0	0	0.00126336	0.00463621	0.023067	0.127779	0.59271	108844	109812	113625	14475	176224	231306	256004	306618	286039	2967	307091	332628	396473	448613	370789	2.63	154595	0.740362	0.289509	0.0957554	0.0287464	0.00865695	0.00285518	0.0010678	0	0	0.915063	11.75	0.069	108287	-0.22	21566	2018	11	9	9	24	49	0.0794
2018-10-30 19:54:59	0	0	0	0	0	0	0.00369215	0.020784	0.120009	0.580577	112308	114346	117523	145404	168665	214518	234529	285292	277084	303108	331021	379464	476956	558185	463838	320485	178455	0.783994	0.265344	0.0695453	0.0147523	0.00280698	0	0	0	0	0.917326	11.93	0.069	108287	-0.22	21566	2018	11	9	9	24	50	0.0794
2018-10-30 19:54:59	0	0	0	0	0	0	0.00360949	0.0204285	0.120419	0.592317	113747	115491	119083	14971	178039	230466	251967	303006	288023	31152	336316	384554	485464	568469	468731	32415	186183	0.889588	0.358378	0.126958	0.04154	0.0130589	0.00392861	0.00113653	0	0	0.902993	11.78	0.069	108663	-0.22	21566	2018	11	9	9	24	51	0.0794
2018-10-30 19:54:59	0	0	0	0	0	0	0.00314875	0.0187617	0.115269	0.592133	117852	121228	124792	15619	185338	239147	260576	308398	285652	297831	309822	336513	402966	46972	416337	339953	252761	168784	0.986416	0.491284	0.204091	0.071882	0.0221617	0.0064874	0.00187725	0	0.903747	11.74	0.069	108512	-0.23	21566	2018	11	9	9	24	52	0.0794
2018-10-30 19:54:59	0	0	0	0	0	0	0.00269759	0.0167102	0.10309	0.53533	109515	115534	120646	151906	180255	232122	252199	295215	269712	278969	28787	315225	382771	446359	385504	298278	209275	134872	0.813898	0.474404	0.276208	0.158943	0.0841882	0.0384103	0.0141956	0.00367696	0.918081	11.93	0.069	108738	-0.23	21566	2018	11	9	9	24	53	0.0794
2018-10-30 19:54:59	0	0	0	0	0	0.00125159	0.00476196	0.0242333	0.135524	0.630198	115168	11348	115172	143336	17047	220678	243228	294371	279232	294443	30988	33831	403256	450127	368239	268269	176432	107671	0.615314	0.333584	0.170507	0.0846895	0.0406892	0.0187495	0.00779107	0.00243932	0.914309	11.78	0.069	108888	-0.23	21567	2018	11	9	9	24	54	0.0794
2018-10-30 19:54:59	0	0	0	0	0	0	0.00244076	0.0157924	0.0998825	0.53165	111597	119825	126964	160309	187604	237622	254322	298154	276356	288386	300331	32616	388458	445779	382087	288695	183916	0.946574	0.388637	0.131502	0.0393592	0.0113861	0.00339658	0.00108399	0	0	0.911291	11.75	0.069	108963	-0.23	21567	2018	11	9	9	24	55	0.0794
2018-10-30 19:54:59	0	0	0	0	0	0	0.00301449	0.0175846	0.10524	0.532457	108507	115429	121968	153459	179167	22705	247037	296494	282958	299559	31661	340037	391421	415104	319939	216278	128237	0.672181	0.318881	0.143055	0.0634608	0.0285709	0.0132635	0.00652885	0.00332903	0.00131855	0.921098	11.9	0.069	108738	-0.23	21568	2018	11	9	9	24	56	0.0794
2018-10-30 19:54:59	0	0	0	0	0	0	0.00344661	0.0196606	0.114052	0.560372	112644	118821	124509	155564	182609	233692	257078	30784	290939	300673	310012	327016	373704	415652	35941	291694	221889	159918	11084	0.741803	0.477472	0.289109	0.158305	0.0732612	0.027035	0.00699548	0.914309	11.78	0.069	108738	-0.22	21567	2018	11	9	9	24	57	0.0794
2018-10-30 19:54:59	0	0	0	0	0	0.00125591	0.00466693	0.0232405	0.128267	0.594933	108776	109724	111955	139346	164818	212617	235433	289388	283997	311412	341048	379118	447857	465778	335563	20427	105748	0.471332	0.182714	0.0623946	0.0189862	0.00526021	0.00139675	0	0	0	0.928642	11.75	0.069	109039	-0.23	21567	2018	11	9	9	24	58	0.0794
2018-10-30 19:54:59	0	0	0	0	0	0	0.00382878	0.0212523	0.12438	0.608009	116136	116986	118923	145785	169899	217422	23893	28997	279499	301582	324903	359873	43161	476193	376567	259245	155478	0.812826	0.37087	0.151755	0.057313	0.0207949	0.00750741	0.00283114	0.00109489	0	0.922607	11.91	0.069	108663	-0.22	21567	2018	11	9	9	24	59	0.0794
2018-10-30 19:54:59	0	0	0	0	0	0	0.00332619	0.0189134	0.113245	0.568742	112024	116173	120582	151916	181555	23589	260536	312796	294085	306627	319101	33841	38781	414257	32263	218464	126481	0.626013	0.269427	0.104465	0.0382835	0.0139198	0.00516258	0.00194654	0	0	0.911291	11.78	0.069	108738	-0.23	21568	2018	11	9	9	25	0	0.0794
2018-10-30 19:54:59	0	0	0	0	0	0	0.00273832	0.0175791	0.111448	0.588107	117756	120951	124087	155355	184044	236151	254949	299874	277417	291809	306287	331187	391542	447032	389512	318172	246029	182607	133169	0.981513	0.748149	0.591316	0.445984	0.273734	0.111978	0.0277819	0.906765	11.75	0.069	108663	-0.22	21568	2018	11	9	9	25	1	0.0794
2018-10-30 19:54:59	0	0	0	0	0	0	0.00336266	0.0190488	0.11332	0.568155	112406	116338	119682	148688	175375	226099	24758	294712	275735	287659	299269	32129	373841	421864	372242	323035	284912	261635	25234	25577	263743	257657	206564	114288	0.396006	0.0852439	0.911291	11.9	0.069	108587	-0.23	21568	2018	11	9	9	25	2	0.0794
2018-10-30 19:54:59	0	0	0	0	0	0	0.00306313	0.0183369	0.111391	0.568154	11445	119694	125436	158841	189026	242841	262111	307981	284218	295733	307038	336057	405707	469329	403614	309536	209249	123753	0.639625	0.295432	0.12384	0.0481184	0.0166517	0.00497236	0.00126011	0	0.909028	11.76	0.069	108663	-0.23	21568	2018	11	9	9	25	3	0.0794
2018-10-30 19:54:59	0	0	0	0	0	0.0010799	0.00407936	0.0213199	0.122432	0.588682	110906	112303	115301	143505	169187	216676	236855	28588	273667	292604	312267	343171	409755	465226	394504	302978	207765	125541	0.669704	0.323395	0.146301	0.062843	0.025128	0.00909495	0.00284627	0	0.918081	11.93	0.069	108512	-0.24	21568	2018	11	9	9	25	4	0.0794
2018-10-30 19:54:59	0	0	0	0	0	0	0.0034234	0.0203647	0.123455	0.619078	117577	116404	116711	143682	168494	21649	235935	282589	266456	284448	303119	33698	414935	481198	401612	285105	168719	0.845873	0.374047	0.154599	0.0617245	0.0245107	0.00940512	0.0032919	0	0	0.920344	11.9	0.069	108888	-0.22	21568	2018	11	9	9	25	5	0.0794
2018-10-30 19:54:59	0	0	0	0	0	0.00108858	0.00432013	0.023107	0.128111	0.597368	112746	114338	117354	146066	172826	222661	244632	294528	281262	303284	326469	370244	456804	511096	402751	272617	163301	0.901796	0.477715	0.250482	0.131259	0.0673176	0.0325136	0.0139495	0.00488108	0.00119987	0.914309	11.76	0.069	108512	-0.22	21568	2018	11	9	9	25	6	0.0794
2018-10-30 19:54:59	0	0	0	0	0	0	0.00302989	0.018387	0.114138	0.58909	115667	117329	120278	15075	17876	232185	25631	30942	29063	303089	315369	329779	367499	372641	276717	190751	128985	0.919894	0.748373	0.763915	104072	188341	384948	673867	690858	275318	0.913554	11.9	0.069	108587	-0.23	21568	2018	11	9	9	25	7	0.0794
2018-10-30 19:54:59	0	0	0	0	0	0	0.00384542	0.0206631	0.117524	0.562093	106479	108822	112632	141618	168454	219518	245638	303619	298013	317614	337925	358664	406134	430354	336615	23204	137001	0.675461	0.275184	0.0931343	0.0271796	0.00717179	0.0018536	0	0	0	0.917326	11.88	0.069	108888	-0.22	21568	2018	11	9	9	25	8	0.0794
2018-10-30 19:54:59	0	0	0	0	0	0	0.00305402	0.0180394	0.110128	0.566419	115885	122869	129293	161501	188531	238154	257542	304505	284755	296859	308802	329647	383201	430388	370254	298365	228475	169089	123113	0.89289	0.633768	0.423234	0.249117	0.121631	0.044906	0.011208	0.911291	11.75	0.069	108663	-0.23	21568	2018	11	9	9	25	9	0.0794
2018-10-30 19:54:59	0	0	0	0	0	0.0013946	0.00510162	0.0248281	0.13622	0.624258	111972	110527	111915	139866	169153	223752	250202	302368	283879	293398	302594	32513	384335	42918	346517	235272	128933	0.557679	0.18842	0.0509083	0.011419	0.00228902	0	0	0	0	0.918835	11.93	0.069	108888	-0.22	21569	2018	11	9	9	25	10	0.0794
2018-10-30 19:54:59	0	0	0	0	0	0	0.00334196	0.0193233	0.115218	0.57771	114157	118168	12318	156447	187377	243959	268443	319601	296358	304131	31122	333691	396009	474277	449562	406278	340415	253948	161203	0.844482	0.366487	0.139185	0.0493159	0.0175763	0.00646372	0.0020138	0.911291	11.88	0.069	108888	-0.23	21569	2018	11	9	9	25	11	0.0794
2018-10-30 19:54:59	0	0	0	0	0	0	0.0038218	0.0211706	0.122851	0.599252	115741	118387	121299	149158	173182	22131	243268	294174	281105	29569	310153	339506	411557	501863	481484	440313	383541	318689	249491	180437	116316	0.640771	0.28585	0.103035	0.0303447	0.00663503	0.906765	11.76	0.069	108587	-0.23	21569	2018	11	9	9	25	12	0.0794
2018-10-30 19:54:59	0	0	0	0	0	0	0.00304172	0.0181162	0.109819	0.561077	113842	120112	125214	155269	179888	22895	251312	30535	295012	316424	338714	373438	446938	511384	440398	34881	253526	166455	0.962715	0.480458	0.204824	0.0751257	0.0249451	0.00818681	0.00281568	0	0.906765	11.83	0.0618	108663	-0.2	21573	2018	11	9	9	25	41	0.0767
2018-10-30 19:54:59	0	0	0	0	0	0	0.00378262	0.0206795	0.122676	0.608324	11582	117569	120194	150031	177768	22972	252372	30389	286682	303395	320505	348122	408299	441211	346815	246645	163484	103741	0.642411	0.40291	0.262047	0.177483	0.114022	0.0619372	0.0242247	0.0059328	0.911291	11.93	0.0687	108738	-0.22	21571	2018	11	9	9	25	42	0.0791
2018-10-30 19:54:59	0	0	0	0	0	0.00142767	0.00497971	0.0237031	0.128823	0.592157	110064	113563	118848	1512	182501	235044	254827	298177	27389	280366	286208	303411	349968	396182	355469	314111	2772	244608	212378	177537	138709	0.975399	0.584073	0.279094	0.10069	0.0244013	0.913554	11.84	0.0689	108738	-0.2	21.57	2018	11	9	9	25	43	0.0792
2018-10-30 19:54:59	0	0	0	0	0	0	0.0033112	0.0190263	0.115322	0.581997	111994	113982	116968	146481	173603	223519	243133	290715	273331	290024	307192	336723	402957	44962	361904	252652	152709	0.817796	0.40434	0.195594	0.0975958	0.0524981	0.0303126	0.0182012	0.00964608	0.00316722	0.924116	11.75	0.0689	109039	-0.21	21.57	2018	11	9	9	25	44	0.0793
2018-10-30 19:54:59	0	0	0	0	0	0.00100629	0.00384174	0.020221	0.116702	0.567768	107781	110456	112918	140326	165989	214413	235877	28329	267434	281842	296385	327261	399124	470081	411406	316582	207787	115188	0.553471	0.242409	0.100875	0.0397867	0.0143296	0.00462721	0.00131971	0	0.920344	11.95	0.0689	108963	-0.21	21571	2018	11	9	9	25	45	0.0793
2018-10-30 19:54:59	0	0	0	0	0	0.00107677	0.00415423	0.0219371	0.125837	0.603277	112905	113887	11638	145079	173646	228306	256599	315171	304726	323394	34264	363409	409798	425555	322121	212625	118893	0.548936	0.208505	0.0676258	0.0203194	0.0062886	0.00218612	0	0	0	0.90601	11.83	0.069	108738	-0.2	21.57	2018	11	9	9	25	46	0.0793
2018-10-30 19:54:59	0	0	0	0	0	0	0.00337742	0.0192717	0.113451	0.562201	110526	115656	121142	153117	181893	23335	253209	299268	279878	293655	30744	333235	39421	45252	398527	325032	241038	158219	0.907575	0.454992	0.202561	0.0813054	0.0300593	0.0104513	0.0034173	0	0.911291	11.76	0.069	108587	-0.22	21571	2018	11	9	9	25	47	0.0793
2018-10-30 19:54:59	0	0	0	0	0	0.00124154	0.00471512	0.023696	0.13311	0.62394	113671	113268	115498	144317	172089	223657	245457	293706	274063	284698	295066	321941	387547	450769	393309	31127	220899	140296	0.798586	0.421637	0.215763	0.110201	0.0546076	0.024136	0.00843023	0.00189872	0.909028	11.95	0.069	108362	-0.22	21.57	2018	11	9	9	25	48	0.0793
2018-10-30 19:54:59	0	0	0	0	0	0	0.0028608	0.0169546	0.106814	0.566469	116156	121985	126458	157129	183236	233983	255649	307989	292631	31141	330782	363694	437392	494428	405491	290782	182799	103422	0.546202	0.27946	0.138614	0.0652233	0.02706	0.00933564	0.00255085	0	0.907519	11.83	0.069	108738	-0.22	21571	2018	11	9	9	25	49	0.0793
2018-10-30 19:54:59	0	0	0	0	0	0	0.00336029	0.0192949	0.114464	0.569553	112045	114972	118357	14855	176342	226192	245112	28979	270369	28403	29779	324083	385942	440266	375848	286295	190274	108532	0.525417	0.21736	0.0780548	0.0247663	0.00706707	0.0019341	0	0	0.912045	11.76	0.069	108663	-0.22	21571	2018	11	9	9	25	50	0.0793
2018-10-30 19:54:59	0	0	0	0	0	0	0.00321122	0.0188685	0.113756	0.573973	11237	114531	117286	146531	173283	225185	248852	301122	286019	302856	320056	352013	425179	486145	402772	28631	17101	0.849109	0.347846	0.120373	0.0369218	0.0107079	0.00306021	0	0	0	0.913554	11.95	0.069	108963	-0.22	21571	2018	11	9	9	25	51	0.0793
2018-10-30 19:54:59	0	0	0	0	0	0	0.00304469	0.0173854	0.105168	0.53697	108385	115847	123488	157185	184091	229568	240891	278399	255156	26728	279355	311906	389218	47617	43641	351983	242508	141206	0.708013	0.319548	0.137128	0.0588389	0.0253256	0.0105555	0.0039347	0.00111461	0.915063	11.82	0.069	108663	-0.22	21571	2018	11	9	9	25	52	0.0794
2018-10-30 19:54:59	0	0	0	0	0	0.00117561	0.00443358	0.0227399	0.130777	0.627819	117136	117543	120249	149665	176057	223777	240541	286011	268727	287474	306997	347775	435422	5053	412426	281359	15965	0.766357	0.316938	0.116816	0.0401089	0.0137387	0.00488534	0.00186303	0	0	0.907519	11.75	0.069	108362	-0.21	21571	2018	11	9	9	25	53	0.0793
2018-10-30 19:54:59	0	0	0	0	0	0.00144465	0.00536857	0.0258822	0.13882	0.623456	110773	108623	109662	136361	162294	211679	235056	287079	277449	297268	317862	355375	437243	51288	44141	329814	208157	109309	0.474084	0.173384	0.0547797	0.0155547	0.00413538	0.00112053	0	0	0.915063	11.95	0.069	108738	-0.22	21571	2018	11	9	9	25	54	0.0793
2018-10-30 19:54:59	0	0	0	0	0	0.00101727	0.00398215	0.0215989	0.123096	0.587452	112122	113722	116893	145004	17072	220613	246243	304065	298311	32304	349183	384904	456594	508704	420742	315077	215487	133935	0.73821	0.353102	0.148956	0.0589006	0.0229391	0.00919581	0.00367777	0.00113096	0.902238	11.81	0.069	108738	-0.2	21571	2018	11	9	9	25	55	0.0793
2018-10-30 19:54:59	0	0	0	0	0	0.00123332	0.00459483	0.0230234	0.130493	0.612764	110308	108236	10973	139024	170462	226581	253046	306199	288051	301426	314859	33237	375583	385728	286185	188965	112969	0.627754	0.330681	0.170042	0.0869466	0.0453045	0.0237047	0.0120853	0.00549907	0.00183164	0.926379	11.75	0.069	108663	-0.21	21571	2018	11	9	9	25	56	0.0793
2018-10-30 19:54:59	0	0	0	0	0	0	0.00392191	0.0213243	0.123087	0.596139	113501	115536	118168	146669	172401	221206	240723	285793	26617	2772	288065	316227	384843	452719	394951	299888	191879	102528	0.462274	0.18269	0.0651709	0.0218354	0.00698975	0.00221497	0	0	0.922607	11.93	0.069	108512	-0.22	21571	2018	11	9	9	25	57	0.0793
2018-10-30 19:54:59	0	0	0	0	0	0.00131345	0.00475438	0.0230586	0.126771	0.587429	107915	110614	1158	147628	177773	230083	251668	299809	279626	288568	297141	318819	375289	42148	351033	257976	165046	0.930656	0.479149	0.234289	0.111045	0.051276	0.0224877	0.00915735	0.00328822	0	0.915063	11.8	0.069	108512	-0.22	21571	2018	11	9	9	25	58	0.0793
2018-10-30 19:54:59	0	0	0	0	0	0.00107062	0.00418154	0.0221328	0.128453	0.619994	11424	114317	116544	146279	175673	228545	249262	29472	270862	278884	286485	309909	373259	436625	379941	291771	192672	108541	0.529671	0.237967	0.105229	0.0484115	0.0230007	0.0108522	0.00460469	0.00140496	0.913554	11.75	0.069	108287	-0.22	21571	2018	11	9	9	25	59	0.0793
2018-10-30 19:54:59	0	0	0	0	0	0.00112478	0.00433943	0.0226659	0.132431	0.646755	120791	121548	123876	154894	183522	235211	252557	293076	262554	263589	26383	284519	349336	440867	43593	400457	329611	236329	1444	0.764516	0.364648	0.164518	0.0697035	0.027012	0.00891255	0.00213301	0.905256	11.94	0.069	108287	-0.22	21571	2018	11	9	9	26	0	0.0794
2018-10-30 19:54:59	0	0	0	0	0	0	0.00301744	0.0178609	0.111674	0.585112	11755	122184	126088	156778	183444	233786	251699	296079	272375	28264	292626	320099	388922	461932	412147	33079	233089	142928	0.771721	0.387317	0.193025	0.10102	0.0534405	0.0260263	0.0101882	0.00273462	0.912045	11.8	0.069	108663	-0.21	21571	2018	11	9	9	26	1	0.0793
2018-10-30 19:54:59	0	0	0	0	0	0.00121734	0.00446089	0.0220954	0.122519	0.574692	10942	114248	12033	151031	176522	22195	238884	284948	271355	286746	302449	326196	377035	40746	33033	249442	180862	129305	0.924278	0.663347	0.480364	0.343605	0.228968	0.131482	0.0579343	0.0154116	0.917326	11.75	0.069	108587	-0.22	21572	2018	11	9	9	26	2	0.0794
2018-10-30 19:54:59	0	0	0	0	0	0.00106916	0.00411522	0.0215473	0.119675	0.563847	108906	113649	118994	149878	176716	223485	238613	278319	258364	27171	28502	323328	41273	527894	514403	440308	313201	177038	0.782937	0.278934	0.0855795	0.0245713	0.00711255	0.00214537	0	0	0.908274	11.93	0.069	108512	-0.22	21571	2018	11	9	9	26	3	0.0794
2018-10-30 19:54:59	0	0	0	0	0	0.00102003	0.00415148	0.0224233	0.128763	0.612765	112906	111871	114735	145141	17567	231143	255441	30759	289402	300711	31179	329803	377459	415589	350175	274056	195068	124059	0.706269	0.3707	0.182784	0.0842411	0.0338853	0.0113903	0.00317245	0	0.907519	11.79	0.069	108813	-0.22	21572	2018	11	9	9	26	4	0.0794
2018-10-30 19:54:59	0	0	0	0	0	0	0.00274789	0.0173147	0.110332	0.586477	11904	12332	127197	159159	187153	239362	258016	304365	281292	29566	310132	342985	420618	492342	42149	314404	20056	109932	0.53218	0.239118	0.103558	0.0448595	0.0190923	0.00779367	0.00280949	0	0.907519	11.75	0.069	108888	-0.21	21571	2018	11	9	9	26	5	0.0794
2018-10-30 19:54:59	0	0	0	0	0	0	0.00383152	0.0209228	0.120315	0.581919	111222	114763	11998	152536	182408	235316	256075	303981	283822	295722	30746	33404	399074	457404	389291	291733	188317	104438	0.50878	0.22511	0.0931126	0.0366962	0.0136657	0.00477946	0.00156002	0	0.907519	11.93	0.069	108287	-0.22	21572	2018	11	9	9	26	6	0.0794
2018-10-30 19:54:59	0	0	0	0	0	0.00135974	0.00476965	0.023013	0.127664	0.594873	109535	111223	115384	145454	173288	221216	237424	279091	25888	272486	286117	32475	416683	524258	485664	386987	260594	150971	0.774492	0.365342	0.164215	0.0727198	0.0320963	0.0139311	0.00562968	0.00170934	0.912045	11.79	0.069	108211	-0.22	21571	2018	11	9	9	26	7	0.0794
2018-10-30 19:54:59	0	0	0	0	0	0.00101434	0.00394693	0.0212231	0.123744	0.603726	114727	116974	120211	149524	175928	226155	247822	299607	286319	307606	329812	373279	467834	557747	480097	354812	223055	118784	0.540461	0.220015	0.0858364	0.0336988	0.013025	0.00493463	0.00183699	0	0.90073	11.75	0.069	108587	-0.21	21571	2018	11	9	9	26	8	0.0794
2018-10-30 19:54:59	0	0	0	0	0	0	0.00367155	0.0194655	0.110974	0.535757	105157	110607	117139	148988	178206	230359	252853	303683	289065	306373	32403	358672	434343	502053	428208	318246	201642	108517	0.515128	0.229391	0.103603	0.0495956	0.0255239	0.0137369	0.00709439	0.00253585	0.913554	11.91	0.069	108287	-0.22	21572	2018	11	9	9	26	9	0.0794
2018-10-30 19:54:59	0	0	0	0	0	0.00119742	0.00449836	0.0228704	0.128744	0.609777	114112	116169	119424	148987	175666	22522	247038	298315	285069	299375	31372	332487	377684	413631	352929	292906	239119	190357	146259	107984	0.768773	0.506949	0.28943	0.136624	0.0527922	0.014786	0.90073	11.78	0.069	108813	-0.21	21571	2018	11	9	9	26	10	0.0794
2018-10-30 19:54:59	0	0	0	0	0	0	0.00289321	0.0170162	0.104203	0.536485	108661	115601	123182	157795	187134	236977	251727	292896	268339	279781	291067	3223	397051	474175	419063	324085	212328	114453	0.504798	0.188391	0.0636443	0.0206636	0.00671533	0.00228858	0	0	0.911291	11.75	0.069	108738	-0.22	21571	2018	11	9	9	26	11	0.0794
2018-10-30 19:54:59	0	0	0	0	0	0	0.00366396	0.0205903	0.119208	0.57937	112751	117215	124116	15987	193647	249671	267258	30664	273735	273177	271598	284369	330441	392194	379518	367233	357946	354809	358054	3697	384912	377352	302464	169604	0.564999	0.09112	0.886397	11.91	0.069	108437	-0.21	21571	2018	11	9	9	26	12	0.0794
2018-10-30 19:54:59	0	0	0	0	0	0	0.00349829	0.019706	0.115647	0.571794	113344	118226	123771	155245	181919	230003	247985	294853	278834	299254	320583	359275	438425	504854	428705	323087	21328	121463	0.596121	0.257959	0.103137	0.0390617	0.0139316	0.00464426	0.0014451	0	0.90601	11.78	0.069	108738	-0.22	21571	2018	11	9	9	26	13	0.0794
2018-10-30 19:54:59	0	0	0	0	0	0	0.00318469	0.0188743	0.114945	0.584992	116143	117666	118819	145077	169595	220266	246644	303434	294525	315857	338164	369889	438995	483692	382051	25716	144981	0.684024	0.273622	0.0969774	0.0320246	0.0101331	0.00297893	0	0	0	0.909028	11.75	0.069	108813	-0.2	21571	2018	11	9	9	26	14	0.0794
2018-10-30 19:54:59	0	0	0	0	0	0.00110709	0.00432345	0.0229612	0.130005	0.613306	114344	11551	119905	152399	18337	237566	260181	312019	294334	3083	322257	347423	408767	461556	391756	298209	198611	114068	0.577273	0.273623	0.128992	0.0623695	0.0294238	0.0127616	0.00464862	0.00128399	0.90601	11.9	0.069	108287	-0.22	21571	2018	11	9	9	26	15	0.0794
2018-10-30 19:54:59	0	0	0	0	0	0	0.00348877	0.0198288	0.119171	0.599899	118268	122096	12642	157803	184877	234857	253399	301605	284352	303064	322407	360532	446004	523393	443772	318555	187757	0.899577	0.357111	0.123547	0.0388441	0.0115716	0.00322501	0	0	0	0.903747	11.76	0.069	108211	-0.22	21571	2018	11	9	9	26	16	0.0794
2018-10-30 19:54:59	0	0	0	0	0	0.00125914	0.0045475	0.0222232	0.12376	0.581767	10961	112188	115614	143653	169206	218209	242114	294908	283606	296345	308991	327565	374607	416575	358514	288787	212256	138089	0.777636	0.379974	0.166547	0.0675461	0.0258485	0.00937643	0.00305076	0	0.912045	11.93	0.069	108738	-0.22	21571	2018	11	9	9	26	17	0.0794
2018-10-30 19:54:59	0	0	0	0	0	0	0.00327471	0.0189864	0.114339	0.576064	112895	11635	120292	151122	178902	229618	249998	299134	282467	300423	319028	348973	413593	44064	324515	196268	0.960541	0.382758	0.127217	0.0370819	0.0100226	0.00269661	0	0	0	0	0.909782	11.9	0.069	108362	-0.22	21571	2018	11	9	9	26	18	0.0794
2018-10-30 19:54:59	0	0	0	0	0	0	0.00346794	0.0197207	0.116713	0.577895	111887	114835	119103	149651	176952	228141	251037	303661	28931	309093	32962	36568	443357	498799	401798	279885	17038	0.931131	0.471484	0.234289	0.122695	0.0711884	0.0444752	0.0276807	0.0146118	0.00487906	0.911291	11.75	0.069	108738	-0.22	21571	2018	11	9	9	26	19	0.0794
2018-10-30 19:54:59	0	0	0	0	0	0.0011416	0.00424021	0.021732	0.1247	0.599745	112329	115346	119859	152283	182582	232997	249024	288107	260399	263835	266641	281068	32852	380713	343032	288552	224737	163109	11158	0.731263	0.458838	0.274907	0.152251	0.0766694	0.0326201	0.00950703	0.911291	11.94	0.069	108211	-0.22	21571	2018	11	9	9	26	20	0.0794
2018-10-30 19:54:59	0	0	0	0	0	0	0.00357922	0.0206071	0.120367	0.588061	114212	116342	120203	150971	180224	232682	253418	298037	274406	280113	285067	301297	350301	416037	405092	396361	381406	34258	268903	176786	0.98391	0.478613	0.205075	0.0810606	0.0297133	0.00795416	0.90601	11.88	0.069	108136	-0.22	21571	2018	11	9	9	26	21	0.0794
2018-10-30 19:54:59	0	0	0	0	0	0.00124434	0.00462491	0.0231402	0.127616	0.59016	109696	111581	116656	148659	178379	227911	243893	284283	2603	269269	277858	308209	382976	465899	424945	345783	247111	153733	0.83695	0.412848	0.18899	0.0796976	0.029507	0.00938217	0.00254544	0	0.911291	11.76	0.069	107986	-0.2	21571	2018	11	9	9	26	22	0.0794
2018-10-30 19:54:59	0	0	0	0	0	0	0.00324193	0.0188573	0.113219	0.570105	112613	116563	120458	150163	174758	222175	242276	294278	284928	309316	335233	372203	445488	498408	410958	303946	200146	116939	0.612467	0.296992	0.139805	0.0658466	0.0308836	0.0139994	0.00569043	0.00175017	0.911291	11.93	0.069	108136	-0.22	21572	2018	11	9	9	26	23	0.0794
2018-10-30 19:54:59	0	0	0	0	0	0	0.00353049	0.0197571	0.117562	0.586131	115182	119248	124286	156132	182023	228384	241506	282643	262299	281618	30169	353324	467917	599694	556192	436962	281183	146445	0.627249	0.230681	0.0760855	0.0235614	0.00696489	0.00208555	0	0	0.89394	11.88	0.069	108061	-0.22	21573	2018	11	9	9	26	24	0.0794
2018-10-30 19:54:59	0	0	0	0	0	0.00104358	0.0041566	0.0220817	0.127569	0.615028	115428	115761	118167	146872	171505	216942	232745	278505	265304	286529	308951	348564	43033	491632	400811	283152	174676	0.958372	0.473759	0.214677	0.0900544	0.0359429	0.0140051	0.0054232	0.00196241	0	0.902993	11.76	0.069	108061	-0.21	21573	2018	11	9	9	26	25	0.0794
2018-10-30 19:54:59	0	0	0	0	0	0	0.00333574	0.0194	0.117274	0.589893	11367	115688	119273	14995	178162	227846	243256	282329	256817	267002	276969	304106	371754	444689	401642	326409	233112	144194	0.762361	0.347649	0.138876	0.0501654	0.0165788	0.00512144	0.00150113	0	0.9128	11.94	0.069	108061	-0.23	21572	2018	11	9	9	26	26	0.0794
2018-10-30 19:54:59	0	0	0	0	0	0	0.00358875	0.0205187	0.123193	0.615152	118353	119143	12124	149607	173759	218867	232474	273691	25622	277965	301031	349696	45404	555554	482343	348896	202535	0.929371	0.340011	0.105406	0.0299468	0.00860559	0.00264466	0	0	0	0.906765	11.87	0.069	108211	-0.22	21572	2018	11	9	9	26	27	0.0794
2018-10-30 19:54:59	0	0	0	0	0	0	0.00341078	0.0197337	0.117133	0.583099	114666	118267	122413	153696	181811	233557	255034	302995	282112	292224	301962	324194	38263	443812	398238	336991	267686	195798	127996	0.734541	0.362425	0.152018	0.053342	0.0160361	0.00406304	0	0.902238	11.75	0.069	108136	-0.22	21572	2018	11	9	9	26	28	0.0794
2018-10-30 19:54:59	0	0	0	0	0	0	0.00331692	0.0191494	0.115282	0.580903	114893	117877	121509	150884	176594	224381	242686	288433	270017	285685	301636	337136	417411	494327	430351	332122	224544	13139	0.661749	0.291174	0.115391	0.0427982	0.0152588	0.00533213	0.00174997	0	0.909028	11.93	0.069	108061	-0.21	21572	2018	11	9	9	26	29	0.0794
2018-10-30 19:54:59	0	0	0	0	0	0	0.00398712	0.0216516	0.123209	0.589932	111655	11414	116892	144709	170756	223069	252172	313768	309316	333101	358201	384531	436206	440297	312722	18958	0.990554	0.45354	0.186494	0.0716234	0.0267561	0.00980239	0.00339475	0.00108855	0	0	0.910537	11.85	0.069	108512	-0.21	21572	2018	11	9	9	26	30	0.0794
2018-10-30 19:54:59	0	0	0	0	0	0	0.0036497	0.0198915	0.115914	0.570772	112333	117056	121111	150465	177124	227386	250032	29922	281688	291658	301391	320289	369984	401948	318783	218605	127432	0.62405	0.259961	0.0956233	0.0328492	0.0111952	0.00388895	0.00140075	0	0	0.90601	11.75	0.069	108437	-0.23	21571	2018	11	9	9	26	31	0.0794
2018-10-30 19:54:59	0	0	0	0	0	0	0.00313882	0.0176313	0.106064	0.539996	109464	116942	123705	156068	183175	232232	250296	297743	282266	302553	323708	362093	442761	510173	427171	308159	187816	0.964326	0.429394	0.173252	0.066646	0.0253183	0.00953636	0.0034454	0.00111758	0	0.905256	11.94	0.069	108211	-0.21	21571	2018	11	9	9	26	32	0.0794
2018-10-30 19:54:59	0	0	0	0	0	0	0.00334997	0.019548	0.116773	0.583987	114007	117037	119706	14834	174879	228728	258419	320277	312021	3314	351343	375361	431567	466287	370462	256635	151639	0.756076	0.32387	0.124301	0.0455594	0.0171921	0.00693833	0.0031013	0.00146441	0	0.896203	11.85	0.069	108287	-0.22	21.57	2018	11	9	9	26	33	0.0794
2018-10-30 19:54:59	0	0	0	0	0	0.00107768	0.00410688	0.0215387	0.122408	0.586749	111603	114993	11838	147304	175743	229004	254782	305357	286092	2935	300477	312029	348412	367126	2908	209097	135303	0.785792	0.411422	0.197212	0.0862109	0.0334377	0.0109423	0.00303758	0	0	0.917326	11.75	0.069	108061	-0.21	21.57	2018	11	9	9	26	34	0.0794
2018-10-30 19:54:59	0	0	0	0	0	0.00108318	0.00411377	0.0213709	0.118503	0.557115	106815	112094	117615	148318	176418	226907	249436	299293	285292	301236	317466	342559	396941	431552	3.51	259786	17525	107801	0.610329	0.320649	0.158253	0.0720212	0.0299083	0.0113106	0.00387926	0	0.907519	11.94	0.069	108211	-0.22	21.57	2018	11	9	9	26	35	0.0794
2018-10-30 19:54:59	0	0	0	0	0	0	0.0026266	0.0163022	0.102246	0.543272	113912	122847	129597	163199	191992	246989	270285	321301	299896	308557	316651	337559	397482	472145	439411	37757	284668	178696	0.920782	0.406536	0.164949	0.063927	0.0227812	0.00719863	0.00194136	0	0.891677	11.85	0.069	107911	-0.21	21.57	2018	11	9	9	26	36	0.0794
2018-10-30 19:54:59	0	0	0	0	0	0.00114978	0.00443526	0.0228425	0.128935	0.606476	109871	10925	111055	138565	163371	208228	224955	271357	26183	288525	317528	360011	440672	487031	379458	254312	147994	0.761772	0.353198	0.152528	0.0632479	0.0257251	0.0100822	0.00376129	0.00130311	0	0.915817	11.76	0.069	108061	-0.23	21.57	2018	11	9	9	26	37	0.0794
2018-10-30 19:54:59	0	0	0	0	0	0.00119355	0.00431366	0.0217713	0.118975	0.552663	106252	111697	117396	146975	172703	218039	236032	282476	273581	298672	325581	365467	441329	493119	398095	273943	157184	0.743348	0.29449	0.102412	0.0345075	0.0119329	0.00437851	0.00167496	0	0	0.918081	11.94	0.069	108211	-0.22	21569	2018	11	9	9	26	38	0.0794
2018-10-30 19:54:59	0	0	0	0	0	0.0010775	0.00407964	0.0215017	0.123779	0.598627	113844	116678	120234	149365	174571	220555	23833	28577	273618	29433	316075	348676	416571	472522	400728	305535	201801	109743	0.477752	0.171009	0.0532338	0.0153125	0.00419724	0.00117539	0	0	0.90073	11.84	0.069	107986	-0.22	21569	2018	11	9	9	26	39	0.0794
2018-10-30 19:54:59	0	0	0	0	0	0	0.00321693	0.0186736	0.111418	0.558496	110842	115303	120313	151747	180289	232701	254517	303286	283868	296122	308179	336575	406313	478098	424395	339116	239394	147984	0.82049	0.427504	0.221293	0.114415	0.0546875	0.0218085	0.00655126	0.00136288	0.907519	11.75	0.069	107911	-0.22	21569	2018	11	9	9	26	40	0.0794
2018-10-30 22:54:59	0	0	0	0	0	0	0	0.0041818	0.0255043	0.130158	0.263644	0.268375	0.267747	0.305304	0.30736	0.33377	0.315289	0.359981	0.357321	0.444854	0.551394	0.762457	12017	186703	217751	236781	24588	246447	237299	211328	166225	111206	0.641883	0.319115	0.130824	0.0350651	102897	11.83	0.0618	110016	-0.18	21437	2018	11	9	9	32	29	0.0768
2018-10-30 22:54:59	0	0	0	0	0	0	0	0.00410699	0.0246098	0.123703	0.247496	0.255481	0.255635	0.29154	0.290024	0.311046	0.293092	0.333782	0.328132	0.393354	0.469606	0.644625	106233	184141	236592	258565	231685	164722	0.929133	0.443138	0.201259	0.0921102	0.0404289	0.0158783	0.00513767	0.00113486	103426	11.93	0.0687	110392	-0.19	21435	2018	11	9	9	32	30	0.0791
2018-10-30 22:54:59	0	0	0	0	0	0	0	0.00393749	0.0252775	0.135189	0.275397	0.273072	0.255525	0.2714	0.262072	0.293145	0.298042	0.362881	0.372313	0.454203	0.551683	0.756989	122427	205238	25574	271568	24028	184809	131115	0.886372	0.569475	0.354339	0.210607	0.117928	0.0530675	0.0155191	102822	11.84	0.0689	110843	-0.19	21435	2018	11	9	9	32	31	0.0792
2018-10-30 22:54:59	0	0	0	0	0	0	0	0.00430838	0.0261039	0.131876	0.255555	0.253188	0.245182	0.271758	0.265778	0.285062	0.269839	0.314246	0.316243	0.403904	0.514323	0.752882	126457	201933	226109	217741	180704	130448	0.848988	0.53326	0.343854	0.236575	0.164032	0.106599	0.0536236	0.0160361	10335	11.75	0.0689	111069	-0.18	21433	2018	11	9	9	32	32	0.0793
2018-10-30 22:54:59	0	0	0	0	0	0	0	0.0031885	0.0221813	0.126379	0.262547	0.25778	0.244024	0.265222	0.255774	0.278729	0.270714	0.323008	0.328023	0.418218	0.531101	0.772627	131328	218373	257979	266605	239664	185878	123993	0.736971	0.394053	0.196538	0.0917751	0.0404751	0.0147875	0.00389461	104331	11.95	0.069	110768	-0.18	21431	2018	11	9	9	32	33	0.0793
2018-10-30 22:54:59	0	0	0	0	0	0	0	0.00356761	0.0232614	0.127041	0.266724	0.274021	0.263742	0.278407	0.250415	0.253869	0.237829	0.288593	0.314859	0.438925	0.610084	0.952558	168039	273201	302101	28011	220463	149344	0.901862	0.518121	0.301423	0.186831	0.116868	0.0680348	0.0301104	0.00787279	10418	11.83	0.069	111295	-0.18	21429	2018	11	9	9	32	34	0.0793
2018-10-30 22:54:59	0	0	0	0	0	0	0	0.00412687	0.0252599	0.12841	0.251767	0.245698	0.232282	0.25258	0.252598	0.287841	0.2948	0.356592	0.360618	0.436395	0.526564	0.719907	114344	177229	193973	177809	136925	0.910758	0.552613	0.32998	0.207698	0.141291	0.0970977	0.0616647	0.0314081	0.00954223	105161	11.76	0.069	111445	-0.16	21426	2018	11	9	9	32	35	0.0793
2018-10-30 22:54:59	0	0	0	0	0	0	0.0010431	0.00556727	0.0306498	0.140906	0.258521	0.249947	0.239583	0.267696	0.274287	0.31277	0.317101	0.383017	0.393694	0.477963	0.577736	0.785528	125324	205094	250477	264974	238483	18293	122887	0.782883	0.49549	0.321981	0.204184	0.123252	0.0657518	0.0212536	102973	11.96	0.069	111295	-0.18	21425	2018	11	9	9	32	36	0.0793
2018-10-30 22:54:59	0	0	0	0	0	0	0	0.00496702	0.0277453	0.129594	0.23911	0.235399	0.226547	0.249501	0.248978	0.278296	0.277011	0.330079	0.333554	0.412374	0.507612	0.742311	130242	229551	281886	2777	215079	131672	0.659948	0.282605	0.112866	0.0447566	0.0178754	0.00730778	0.00278819	0	104934	11.83	0.069	111821	-0.18	21424	2018	11	9	9	32	37	0.0793
2018-10-30 22:54:59	0	0	0	0	0	0	0	0.00465162	0.0269466	0.129958	0.246684	0.242261	0.235235	0.264095	0.268917	0.303389	0.299423	0.349396	0.342228	0.405322	0.477527	0.650113	104845	178247	230705	264214	262746	230582	180081	126135	0.813599	0.489359	0.26721	0.124917	0.0453816	0.00968485	104783	11.76	0.069	111746	-0.18	21422	2018	11	9	9	32	38	0.0793
2018-10-30 22:54:59	0	0	0	0	0	0	0	0.00430638	0.0255635	0.126921	0.251814	0.252878	0.24596	0.268334	0.25813	0.274608	0.25865	0.295379	0.289254	0.355272	0.434457	0.649123	118325	219007	281055	283184	219521	137056	0.749945	0.393828	0.211011	0.115992	0.0618544	0.0294038	0.0106452	0.00229887	105387	11.94	0.069	112498	-0.18	21421	2018	11	9	9	32	39	0.0793
2018-10-30 22:54:59	0	0	0	0	0	0	0	0.00473463	0.027968	0.137124	0.263723	0.256768	0.242928	0.260513	0.251186	0.275713	0.274561	0.333225	0.346478	0.437063	0.549126	0.799605	137345	23463	28296	28165	225234	145468	0.808814	0.428213	0.237114	0.142195	0.0881196	0.0510139	0.0229467	0.00674892	105613	11.82	0.069	112347	-0.18	21.42	2018	11	9	9	32	40	0.0793
2018-10-30 22:54:59	0	0	0	0	0	0	0	0.00455378	0.0272672	0.135912	0.264447	0.259696	0.242451	0.251206	0.233486	0.253807	0.261568	0.337922	0.380021	0.495632	0.644517	0.893466	137193	199599	208635	194484	165206	131319	103255	0.863903	0.822658	0.886066	0.961473	0.825578	0.423939	0.099391	105764	11.76	0.069	112949	-0.18	21418	2018	11	9	9	32	41	0.0793
2018-10-30 22:54:59	0	0	0	0	0	0	0	0.00499164	0.029043	0.140422	0.262341	0.250869	0.23389	0.247459	0.233193	0.252916	0.255571	0.331369	0.380219	0.533393	0.746418	114695	195502	294169	288203	229947	157416	0.995039	0.616105	0.392569	0.265573	0.19132	0.13344	0.0808162	0.0372853	0.0115159	105915	11.95	0.069	113099	-0.18	21416	2018	11	9	9	32	42	0.0794
2018-10-30 22:54:59	0	0	0	0	0	0	0	0.00521113	0.0294513	0.139082	0.261141	0.259118	0.254802	0.287501	0.288096	0.314863	0.30452	0.356461	0.356781	0.431829	0.521326	0.701291	1.08	161718	17516	164847	138096	108585	0.821036	0.602313	0.427305	0.300129	0.201827	0.116411	0.0484108	0.0120008	105387	11.81	0.069	113174	-0.19	21415	2018	11	9	9	32	43	0.0793
2018-10-30 22:54:59	0	0	0	0	0	0	0	0.0024334	0.0176029	0.106937	0.25141	0.267607	0.265116	0.291989	0.28178	0.31015	0.309857	0.377378	0.394183	0.500169	0.632634	0.893527	144958	229096	256547	243619	190847	122856	0.682398	0.352182	0.184771	0.099752	0.0540945	0.0268116	0.0107452	0.00279539	105462	11.75	0.069	112799	-0.2	21414	2018	11	9	9	32	44	0.0793
2018-10-30 22:54:59	0	0	0	0	0	0	0.00127684	0.00620387	0.032973	0.146935	0.262321	0.248246	0.229284	0.242318	0.235324	0.258118	0.257266	0.310819	0.324865	0.401721	0.494811	0.676442	106713	166905	189481	184256	153953	118609	0.949974	0.894269	107586	162404	26414	346157	231713	0.502335	106292	11.93	0.069	113024	-0.18	21413	2018	11	9	9	32	45	0.0794
2018-10-30 22:54:59	0	0	0	0	0	0	0	0.00439381	0.0260963	0.130023	0.251908	0.247493	0.227373	0.231515	0.211036	0.22277	0.221236	0.274442	0.298016	0.387687	0.503239	0.729241	12169	193417	208905	180688	125827	0.729852	0.370364	0.178113	0.089965	0.0505701	0.0307147	0.0179708	0.00846333	0.00240172	106368	11.81	0.069	113325	-0.19	21412	2018	11	9	9	32	46	0.0794
2018-10-30 22:54:59	0	0	0	0	0	0	0	0.00347616	0.0221758	0.118453	0.245258	0.250761	0.244263	0.270299	0.267392	0.295429	0.288713	0.340505	0.345567	0.441668	0.562619	0.82621	140642	229755	260122	244566	190768	123949	0.683976	0.333914	0.150792	0.0641642	0.025389	0.00969813	0.00336014	0	107575	11.75	0.069	113626	-0.2	21411	2018	11	9	9	32	47	0.0794
2018-10-30 22:54:59	0	0	0	0	0	0	0	0.00403136	0.025409	0.133698	0.269594	0.270513	0.256766	0.271821	0.255698	0.271167	0.262864	0.315129	0.329803	0.417817	0.528081	0.729114	115114	17753	195374	183538	149952	110894	0.769368	0.524584	0.361423	0.246001	0.144872	0.0669421	0.0207974	0.00390355	106443	11.93	0.069	1134	-0.2	21409	2018	11	9	9	32	48	0.0793
2018-10-30 22:54:59	0	0	0	0	0	0	0.0010654	0.00514083	0.0275809	0.125415	0.233308	0.230334	0.219877	0.236288	0.229552	0.251684	0.251105	0.301971	0.310839	0.378429	0.458727	0.635631	102727	168305	203991	218705	206785	172396	128487	0.879856	0.560906	0.32929	0.174051	0.0804693	0.0300067	0.00743877	107725	11.81	0.069	113776	-0.19	21407	2018	11	9	9	32	49	0.0794
2018-10-30 22:54:59	0	0	0	0	0	0	0	0.00431625	0.0254445	0.125204	0.244032	0.243945	0.238775	0.264551	0.256472	0.272228	0.258833	0.301349	0.303321	0.373026	0.457261	0.632048	101124	161979	192253	204469	190041	147687	0.919583	0.451608	0.183461	0.0657155	0.0226346	0.00770141	0.00253169	0	107197	11.75	0.069	114077	-0.19	21406	2018	11	9	9	32	50	0.0794
2018-10-30 22:54:59	0	0	0	0	0	0	0	0.00346836	0.0218259	0.116552	0.250612	0.26517	0.26091	0.283401	0.272069	0.292939	0.286466	0.340085	0.351518	0.443185	0.557237	0.773237	12156	186844	208411	201761	171704	128034	0.824409	0.465537	0.241514	0.121931	0.0586833	0.025656	0.0089492	0.0020873	106971	11.93	0.069	114453	-0.18	21404	2018	11	9	9	32	51	0.0794
2018-10-30 22:54:59	0	0	0	0	0	0	0.0013587	0.00648687	0.0344816	0.152106	0.264374	0.244715	0.224707	0.235569	0.219955	0.227343	0.212585	0.251124	0.263459	0.349377	0.462208	0.715308	130645	224267	251101	213003	137817	0.709674	0.303294	0.116259	0.0439724	0.0178773	0.00794273	0.00387104	0.00182569	0	10682	11.79	0.069	114227	-0.18	21403	2018	11	9	9	32	52	0.0793
2018-10-30 22:54:59	0	0	0	0	0	0	0	0.00330729	0.0223985	0.12614	0.267807	0.270906	0.257391	0.277119	0.271853	0.310753	0.32506	0.40534	0.421201	0.504581	0.601924	0.774671	11422	175566	210715	235085	2355	205575	155261	104027	0.627142	0.339745	0.156221	0.0623266	0.0221096	0.00611996	107725	11.75	0.069	114453	-0.2	21402	2018	11	9	9	32	53	0.0793
2018-10-30 22:54:59	0	0	0	0	0	0	0	0.00415123	0.0242722	0.120058	0.239415	0.247045	0.24675	0.280076	0.284416	0.317932	0.31518	0.372011	0.373908	0.4522	0.545513	0.746926	118856	182451	193577	167559	120509	0.744296	0.410531	0.207221	0.0991399	0.0452906	0.0195517	0.00783871	0.00268399	0	107575	11.92	0.069	114754	-0.2	21402	2018	11	9	9	32	54	0.0794
2018-10-30 22:54:59	0	0	0	0	0	0	0	0.00454153	0.027685	0.140163	0.272309	0.26426	0.25019	0.274161	0.273746	0.305488	0.302194	0.358848	0.363571	0.455997	0.570348	0.811098	134011	211207	227832	20248	154709	107422	0.699742	0.430462	0.246314	0.127905	0.0561214	0.0197672	0.00527266	0	107122	11.79	0.069	114904	-0.18	21401	2018	11	9	9	32	55	0.0794
2018-10-30 22:54:59	0	0	0	0	0	0	0.00101712	0.00538645	0.0296137	0.13525	0.244206	0.234558	0.225009	0.255244	0.270225	0.312561	0.310463	0.353117	0.331306	0.378302	0.430214	0.57996	0.938742	15439	18613	194025	173773	133307	0.887133	0.527016	0.285165	0.151949	0.0814989	0.0436998	0.0198056	0.00576369	108555	11.75	0.069	114678	-0.2	21.4	2018	11	9	9	32	56	0.0794
2018-10-30 22:54:59	0	0	0	0	0	0	0.00101372	0.00501779	0.0275695	0.127902	0.235598	0.231361	0.21553	0.224672	0.210504	0.226272	0.228785	0.290302	0.325927	0.440919	0.595943	0.86631	137365	187541	16651	120667	0.757754	0.436954	0.24542	0.145912	0.0986711	0.0793228	0.070561	0.0601615	0.0376588	0.0126996	10848	11.91	0.069	114829	-0.18	21399	2018	11	9	9	32	57	0.0794
2018-10-30 22:54:59	0	0	0	0	0	0	0	0.00490513	0.0277873	0.131937	0.251694	0.249895	0.243877	0.273113	0.27315	0.296047	0.28095	0.317108	0.305895	0.360686	0.42326	0.568983	0.898384	148903	192035	226984	237569	218133	178685	133921	0.964736	0.667979	0.434131	0.23233	0.0878922	0.0169927	108178	11.78	0.069	11528	-0.19	21398	2018	11	9	9	32	58	0.0794
2018-10-30 22:54:59	0	0	0	0	0	0	0	0.0028077	0.0200057	0.119151	0.268636	0.279505	0.268783	0.285759	0.268865	0.293219	0.295278	0.364234	0.384674	0.477109	0.589541	0.781847	118359	184977	222325	242833	2322	189487	134135	0.890522	0.593741	0.406632	0.260938	0.14291	0.0555486	0.0110065	106896	11.75	0.069	114754	-0.19	21398	2018	11	9	9	32	59	0.0794
2018-10-30 22:54:59	0	0	0	0	0	0	0.00104766	0.00564276	0.031216	0.144482	0.269004	0.261165	0.249427	0.274073	0.276444	0.313665	0.320857	0.38839	0.395962	0.463382	0.539567	0.694242	10377	164719	207328	246203	267338	256939	212285	146053	0.801663	0.328855	0.100517	0.0241318	0.00542087	0.00123707	107348	11.9	0.069	11513	-0.2	21397	2018	11	9	9	33	0	0.0794
2018-10-30 22:54:59	0	0	0	0	0	0	0.00102809	0.00529169	0.0296473	0.139987	0.266692	0.265256	0.253193	0.267211	0.247359	0.257429	0.249084	0.305634	0.333623	0.443931	0.589391	0.858421	138629	20263	203799	18129	154104	131786	11135	0.870981	0.577545	0.30354	0.124082	0.0397701	0.00984133	0.00185751	108178	11.77	0.069	115054	-0.19	21395	2018	11	9	9	33	1	0.0794
2018-10-30 22:54:59	0	0	0	0	0	0	0.00116976	0.00594152	0.032377	0.145666	0.257584	0.241043	0.229437	0.258358	0.269293	0.309166	0.307245	0.350525	0.326049	0.35922	0.393504	0.504282	0.783134	135424	188808	241365	263738	235486	170919	104509	0.551772	0.257904	0.108198	0.0392028	0.011484	0.00255572	107725	11.75	0.069	114979	-0.19	21395	2018	11	9	9	33	2	0.0794
2018-10-30 22:54:59	0	0	0	0	0	0	0	0.00355301	0.0226993	0.121754	0.254337	0.260234	0.251049	0.268081	0.249425	0.260335	0.247174	0.292864	0.30483	0.396677	0.514945	0.762731	13054	212853	237566	213719	150752	0.846586	0.401842	0.176637	0.0792998	0.038056	0.0196568	0.0103192	0.00500062	0.00159277	108329	11.9	0.069	11513	-0.2	21393	2018	11	9	9	33	3	0.0794
2018-10-30 22:54:59	0	0	0	0	0	0	0	0.00529715	0.0295694	0.137135	0.252136	0.240691	0.227372	0.248902	0.253567	0.291347	0.297075	0.352257	0.345865	0.4048	0.472004	0.64376	104073	169552	198925	199097	169028	121459	0.744066	0.3978	0.194585	0.0883893	0.0372406	0.0146114	0.00513743	0.00144982	109234	11.75	0.069	115882	-0.19	21393	2018	11	9	9	33	4	0.0794
2018-10-30 22:54:59	0	0	0	0	0	0	0	0.00444619	0.0262155	0.129828	0.252234	0.258253	0.255452	0.283818	0.274948	0.294708	0.284782	0.342719	0.358728	0.459333	0.586737	0.852692	144046	230618	245102	201955	131284	0.713055	0.346043	0.162487	0.0780853	0.0386189	0.0180195	0.00717817	0.002141	0	108103	11.93	0.069	115581	-0.2	21393	2018	11	9	9	33	5	0.0794
2018-10-30 22:54:59	0	0	0	0	0	0	0	0.00336535	0.0225576	0.125439	0.266348	0.268171	0.259693	0.287896	0.291958	0.340035	0.356906	0.441773	0.455838	0.539481	0.636138	0.779832	105778	148203	167954	188609	201995	197013	167439	118772	0.700729	0.340826	0.137804	0.0463263	0.0121	0.00208941	108178	11.89	0.069	115355	-0.2	21392	2018	11	9	9	33	6	0.0794
2018-10-30 22:54:59	0	0	0	0	0	0	0	0.00494461	0.0283324	0.135056	0.249488	0.238115	0.22219	0.239145	0.236703	0.265243	0.267342	0.321166	0.325032	0.390386	0.467504	0.634714	101013	160884	183489	175722	14031	0.942805	0.536735	0.267162	0.121025	0.0517092	0.0214986	0.00883263	0.00355705	0.00107336	108932	11.75	0.069	116032	-0.2	21391	2018	11	9	9	33	7	0.0794
2018-10-30 22:54:59	0	0	0	0	0	0	0	0.00463752	0.0262175	0.125112	0.240367	0.243372	0.237875	0.262834	0.258574	0.280665	0.274214	0.323856	0.329261	0.406004	0.499556	0.682618	105469	155226	16245	148394	121541	0.912019	0.626019	0.392076	0.231719	0.130865	0.0687922	0.0319398	0.0119072	0.00282512	108932	11.94	0.069	115581	-0.21	21391	2018	11	9	9	33	8	0.0794
2018-10-30 22:54:59	0	0	0	0	0	0	0	0.00412724	0.0252062	0.128456	0.25587	0.256677	0.248391	0.272014	0.262624	0.280645	0.267492	0.312692	0.317064	0.403333	0.511361	0.753058	13037	217599	249675	236025	187191	129849	0.826654	0.511409	0.32865	0.225412	0.161405	0.105554	0.0532735	0.015649	108782	11.88	0.069	115806	-0.2	21391	2018	11	9	9	33	9	0.0794
2018-10-30 22:54:59	0	0	0	0	0	0	0.00102177	0.00528238	0.0289304	0.133454	0.247246	0.245105	0.234406	0.254194	0.248958	0.273934	0.274866	0.334955	0.353813	0.450972	0.573799	0.811399	129724	192444	193932	1567	101718	0.545629	0.252487	0.108691	0.0478997	0.0234486	0.0130034	0.00792487	0.00466308	0.00195385	109234	11.76	0.069	116182	-0.19	21.39	2018	11	9	9	33	10	0.0794
2018-10-30 22:54:59	0	0	0	0	0	0	0	0.00512715	0.0299389	0.144992	0.271604	0.26125	0.246167	0.269307	0.273006	0.313524	0.322618	0.390509	0.394183	0.469499	0.557367	0.730058	108768	159314	172775	171363	15902	139625	116313	0.931803	0.741574	0.581508	0.42826	0.270824	0.129034	0.0363414	108631	11.94	0.069	116107	-0.21	21389	2018	11	9	9	33	11	0.0794
2018-10-30 22:54:59	0	0	0	0	0	0	0	0.00392078	0.024987	0.131456	0.2619	0.254586	0.239283	0.256558	0.246009	0.265059	0.255945	0.303607	0.309967	0.392034	0.494208	0.716233	123252	206843	235873	214161	159078	106763	0.736705	0.580059	0.543345	0.556267	0.537064	0.412544	0.199583	0.0422613	108782	11.88	0.069	115957	-0.19	21.39	2018	11	9	9	33	12	0.0794
2018-10-30 22:54:59	0	0	0	0	0	0	0	0.00379801	0.0236195	0.123622	0.259414	0.271184	0.270277	0.298691	0.28807	0.308686	0.298165	0.35309	0.36333	0.458876	0.577337	0.821226	134458	221066	267868	281839	251058	18549	11239	0.575379	0.264262	0.117503	0.0535246	0.0250944	0.011463	0.00339315	108254	11.76	0.069	115882	-0.2	21391	2018	11	9	9	33	13	0.0794
2018-10-30 22:54:59	0	0	0	0	0	0	0	0.0039073	0.0238879	0.122551	0.246783	0.248444	0.236276	0.249805	0.234618	0.254835	0.258611	0.325791	0.355904	0.456371	0.583709	0.811085	127046	191727	204734	188606	151198	105308	0.635961	0.346354	0.18421	0.0972209	0.0508775	0.0259324	0.011963	0.00363457	109611	11.93	0.069	116258	-0.2	21391	2018	11	9	9	33	14	0.0794
2018-10-30 22:54:59	0	0	0	0	0	0	0.00147476	0.00651553	0.0331605	0.141881	0.247017	0.239357	0.230616	0.256416	0.259312	0.285341	0.27321	0.306724	0.288982	0.336796	0.390916	0.561953	0.997006	181107	229915	227394	17211	107374	0.597738	0.309257	0.151783	0.0727524	0.034722	0.0158548	0.00623885	0.00156016	109687	11.88	0.069	116558	-0.2	21.39	2018	11	9	9	33	15	0.0794
2018-10-30 22:54:59	0	0	0	0	0	0	0.00121999	0.00611249	0.0331747	0.150363	0.272428	0.261922	0.249622	0.273681	0.273358	0.305493	0.307892	0.371954	0.37892	0.450067	0.532928	0.713693	111781	175581	199278	192674	157559	110249	0.678323	0.381556	0.201146	0.0988886	0.0443373	0.0179596	0.00588782	0.00129724	109461	11.76	0.069	115957	-0.19	21388	2018	11	9	9	33	16	0.0794
2018-10-30 22:54:59	0	0	0	0	0	0	0.00110887	0.00568738	0.0311188	0.141586	0.252057	0.239027	0.226912	0.255023	0.269242	0.321639	0.339629	0.415709	0.41954	0.495819	0.583664	0.781464	122819	198199	235706	235357	187058	118295	0.625977	0.303616	0.147801	0.0743754	0.0372672	0.0171024	0.00661069	0.00178061	109083	11.91	0.069	116107	-0.2	21387	2018	11	9	9	33	17	0.0794
2018-10-30 22:54:59	0	0	0	0	0	0	0	0.00460513	0.0279036	0.140634	0.272595	0.268457	0.255643	0.27441	0.255663	0.260493	0.23737	0.27184	0.274079	0.356642	0.463173	0.699767	123317	202627	220632	191046	134165	0.8051	0.43877	0.234894	0.133394	0.0834832	0.0524655	0.0282773	0.00998862	0.00196784	109234	11.86	0.069	116182	-0.2	21386	2018	11	9	9	33	18	0.0794
2018-10-30 22:54:59	0	0	0	0	0	0	0	0.00383902	0.0234866	0.121743	0.254244	0.26438	0.260953	0.284388	0.268117	0.2777	0.258368	0.297677	0.301403	0.382614	0.483805	0.718858	12699	225166	282065	288697	236981	157482	0.865919	0.407708	0.17264	0.0676441	0.0237645	0.00701652	0.0016098	0	109083	11.75	0.069	116333	-0.2	21384	2018	11	9	9	33	19	0.0794
2018-10-30 22:54:59	0	0	0	0	0	0	0	0.00513324	0.0290951	0.137385	0.254216	0.24791	0.237114	0.258842	0.251603	0.266458	0.24643	0.273844	0.260639	0.315171	0.379388	0.55795	101259	195892	274851	303194	239492	132191	0.528153	0.168485	0.0484103	0.0134814	0.00373086	0.00107166	0	0	109159	11.94	0.069	116333	-0.21	21383	2018	11	9	9	33	20	0.0794
2018-10-30 22:54:59	0	0	0	0	0	0	0.00125119	0.00585162	0.0307261	0.134858	0.238271	0.228821	0.218885	0.243081	0.250712	0.290851	0.302768	0.367423	0.367964	0.428288	0.496915	0.66317	104407	164499	183521	167808	125524	0.789759	0.428328	0.208788	0.0960624	0.0433498	0.0193086	0.00809393	0.00290905	0	109913	11.85	0.069	116558	-0.2	21383	2018	11	9	9	33	21	0.0794
2018-10-30 22:54:59	0	0	0	0	0	0	0	0.00410513	0.0256939	0.13335	0.261608	0.256443	0.241457	0.261739	0.261075	0.30364	0.324815	0.41732	0.449197	0.553648	0.679799	0.872549	124506	17507	184745	179595	166303	155419	15253	15988	173367	175411	14259	0.842737	0.322819	0.0623412	109536	11.75	0.069	116634	-0.21	21381	2018	11	9	9	33	22	0.0794
2018-10-30 22:54:59	0	0	0	0	0	0	0.00144307	0.00715013	0.0375203	0.163704	0.282732	0.267099	0.249891	0.272981	0.277368	0.31485	0.318556	0.379612	0.381905	0.464229	0.56191	0.754656	11405	166157	1807	185557	190277	202481	222076	234654	219252	167886	102535	0.516371	0.197371	0.0474753	108782	11.94	0.069	116709	-0.2	21.38	2018	11	9	9	33	23	0.0794
2018-10-30 22:54:59	0	0	0	0	0	0	0.00130681	0.00632919	0.0332103	0.144657	0.249802	0.232563	0.215084	0.229958	0.227558	0.256384	0.264067	0.331145	0.357576	0.453574	0.573773	0.786515	120549	174574	180792	169345	151881	132142	104966	0.692365	0.357088	0.146232	0.0513009	0.0172483	0.00571025	0.0016293	109385	11.85	0.069	116483	-0.21	21379	2018	11	9	9	33	24	0.0794
2018-10-30 22:54:59	0	0	0	0	0	0	0.00104157	0.0053633	0.0295596	0.136015	0.247497	0.238503	0.226108	0.247349	0.249826	0.286493	0.294862	0.361519	0.37505	0.470792	0.588827	0.836284	136007	212998	23769	228979	191245	141659	0.962227	0.62174	0.389673	0.233337	0.126324	0.0580478	0.0201794	0.00472362	109234	11.75	0.069	116934	-0.2	21378	2018	11	9	9	33	25	0.0794
2018-10-30 22:54:59	0	0	0	0	0	0	0	0.00448057	0.0258746	0.125306	0.240166	0.240818	0.235692	0.262688	0.264792	0.300507	0.306746	0.371238	0.373155	0.432542	0.499521	0.659561	104157	171351	204495	201385	160431	103771	0.553079	0.250087	0.0995568	0.0362395	0.0125024	0.00454285	0.00170609	0	109989	11.95	0.069	11701	-0.2	21377	2018	11	9	9	33	26	0.0794
2018-10-30 22:54:59	0	0	0	0	0	0	0	0.00513366	0.0301914	0.145427	0.262244	0.240315	0.218296	0.234548	0.235765	0.268303	0.271249	0.329729	0.342244	0.440719	0.56658	0.809301	130357	190429	186597	151946	105679	0.636976	0.332302	0.153553	0.0660597	0.0279269	0.0115345	0.00468026	0.00170781	0	110668	11.85	0.069	116408	-0.21	21376	2018	11	9	9	33	27	0.0794
2018-10-30 22:54:59	0	0	0	0	0	0	0	0.0048242	0.0283542	0.140159	0.2735	0.27232	0.255845	0.266671	0.246151	0.2581	0.252335	0.314315	0.353357	0.484495	0.662951	0.978048	160654	24436	253842	218386	159482	104187	0.623268	0.337308	0.17016	0.0798733	0.03645	0.0153752	0.00594571	0.00163581	108404	11.75	0.069	116408	-0.2	21375	2018	11	9	9	33	28	0.0794
2018-10-30 22:54:59	0	0	0	0	0	0	0.00102545	0.00569046	0.0325573	0.153472	0.279463	0.261347	0.24265	0.263521	0.265735	0.302657	0.308617	0.371554	0.371862	0.437142	0.512485	0.683196	108186	173094	196433	17937	127107	0.705261	0.315125	0.119744	0.042484	0.0155515	0.00633795	0.00274788	0.00110126	0	106518	11.83	0.0618	114528	-0.18	21295	2018	11	9	9	36	7	0.0768
2018-10-30 22:54:59	0	0	0	0	0	0	0.00141612	0.00693142	0.0378381	0.169191	0.285102	0.258926	0.238732	0.262797	0.269936	0.315403	0.33261	0.423927	0.45385	0.561015	0.691336	0.909929	134581	196943	215327	215856	195302	154218	101846	0.56242	0.26624	0.112607	0.0431282	0.0148061	0.00420831	0	106518	11.92	0.0687	114528	-0.18	21292	2018	11	9	9	36	8	0.0791
2018-10-30 22:54:59	0	0	0	0	0	0	0	0.003472	0.0223461	0.122142	0.269318	0.292767	0.299238	0.334467	0.315479	0.31976	0.288524	0.320273	0.31177	0.381788	0.466085	0.66451	112612	194869	24441	255048	208901	125856	0.547146	0.178187	0.0489396	0.0130937	0.00396319	0.0014556	0	0	108103	11.84	0.0689	114528	-0.18	21291	2018	11	9	9	36	9	0.0792
2018-10-30 22:54:59	0	0	0	0	0	0	0.00175294	0.00725991	0.0366594	0.154855	0.258511	0.244936	0.231191	0.255536	0.260734	0.295959	0.299771	0.36352	0.373722	0.459335	0.563463	0.783137	125535	189778	193195	153342	0.92818	0.438828	0.173964	0.0638309	0.0243698	0.0104873	0.00526594	0.00303375	0.00173205	0	107725	11.76	0.0689	114453	-0.19	21.29	2018	11	9	9	36	10	0.0792
2018-10-30 22:54:59	0	0	0	0	0	0	0	0.00375198	0.0245165	0.131345	0.262143	0.254001	0.241664	0.266208	0.262947	0.290814	0.286474	0.346642	0.360413	0.468301	0.606898	0.85985	136244	19583	191832	164172	133487	112645	10505	110821	125188	128287	0.964209	0.470853	0.142766	0.0266809	106745	11.95	0.069	114603	-0.19	21.29	2018	11	9	9	36	11	0.0793
2018-10-30 22:54:59	0	0	0	0	0	0	0.00108361	0.00538919	0.0304325	0.143909	0.264932	0.255675	0.241652	0.265172	0.269075	0.308094	0.316832	0.387801	0.400085	0.488692	0.595732	0.797162	120319	170568	168816	143412	107817	0.745488	0.487589	0.312457	0.201296	0.133278	0.089545	0.0586837	0.0334107	0.0141222	108932	11.83	0.069	114302	-0.18	21.29	2018	11	9	9	36	12	0.0793
2018-10-30 22:54:59	0	0	0	0	0	0	0.0016803	0.00733211	0.0377339	0.162252	0.275986	0.257929	0.236317	0.247414	0.240333	0.267067	0.274538	0.343165	0.367745	0.461897	0.579263	0.797282	123511	17861	17812	146693	0.995047	0.557872	0.258761	0.099424	0.0316536	0.00853219	0.00208183	0	0	0	107499	11.76	0.069	114829	-0.17	21289	2018	11	9	9	36	13	0.0793
2018-10-30 22:54:59	0	0	0	0	0	0	0.00220817	0.00843861	0.0400468	0.158199	0.250227	0.224983	0.205907	0.221219	0.221393	0.247768	0.250068	0.306422	0.322295	0.409539	0.519454	0.747019	122011	18112	178573	142921	0.969043	0.593782	0.343607	0.193225	0.108941	0.0619436	0.0337075	0.0160818	0.00602119	0.00149332	107725	11.96	0.069	114528	-0.19	21289	2018	11	9	9	36	14	0.0793
2018-10-30 22:54:59	0	0	0	0	0	0	0.00121034	0.00612647	0.0336739	0.153244	0.269771	0.248078	0.225483	0.237736	0.234715	0.270275	0.287763	0.371544	0.406475	0.508057	0.633277	0.862452	134705	20582	221097	196668	14458	0.892532	0.472984	0.227239	0.107471	0.0550005	0.0320034	0.0208619	0.0125626	0.00459375	107575	11.83	0.069	114227	-0.2	21288	2018	11	9	9	36	15	0.0793
2018-10-30 22:54:59	0	0	0	0	0	0	0.00136411	0.00667215	0.0361367	0.160944	0.274252	0.250649	0.230631	0.249812	0.252418	0.287284	0.291434	0.351159	0.353724	0.425451	0.51055	0.692385	108871	165835	176905	157834	118908	0.770366	0.425548	0.199555	0.0821661	0.032343	0.0128205	0.00505388	0.00170491	0	108178	11.75	0.069	114528	-0.18	21287	2018	11	9	9	36	16	0.0793
2018-10-30 22:54:59	0	0	0	0	0	0	0.00100439	0.00552579	0.032388	0.158059	0.299597	0.291074	0.275257	0.29517	0.283849	0.304558	0.295156	0.352659	0.366206	0.46034	0.576953	0.794455	123779	188041	210364	214178	199929	171739	137755	103845	0.722398	0.432883	0.205064	0.0744521	0.019592	0.00341895	10682	11.95	0.069	114754	-0.2	21285	2018	11	9	9	36	17	0.0793
2018-10-30 22:54:59	0	0	0	0	0	0	0	0.0039303	0.024222	0.126226	0.265373	0.277625	0.279585	0.317727	0.323282	0.364153	0.358585	0.408122	0.382487	0.426255	0.471896	0.634831	106351	201461	29599	37819	390879	299058	16101	0.631455	0.201156	0.0591049	0.0176343	0.00599709	0.00225027	0	106594	11.82	0.069	114528	-0.18	21284	2018	11	9	9	36	18	0.0793
2018-10-30 22:54:59	0	0	0	0	0	0	0	0.00414271	0.0252738	0.129828	0.266664	0.272811	0.265631	0.287742	0.277738	0.30539	0.30719	0.374164	0.388046	0.471966	0.572068	0.795169	131082	221097	264539	250525	177257	0.919835	0.359026	0.111145	0.0298518	0.00745816	0.00184713	0	0	0	106745	11.76	0.069	114754	-0.2	21282	2018	11	9	9	36	19	0.0793
2018-10-30 22:54:59	0	0	0	0	0	0	0.00103048	0.00546857	0.0307065	0.144239	0.269061	0.266061	0.260521	0.298375	0.313716	0.359958	0.358733	0.418296	0.411589	0.48693	0.574512	0.753552	113052	170264	192073	189229	154815	102075	0.549706	0.254438	0.109136	0.0449502	0.0177444	0.00624322	0.00185195	0	106594	11.95	0.069	114302	-0.19	21281	2018	11	9	9	36	20	0.0793
2018-10-30 22:54:59	0	0	0	0	0	0	0.00118841	0.00634383	0.0350453	0.159973	0.284953	0.263744	0.239168	0.246366	0.229661	0.243152	0.237214	0.287088	0.304083	0.397685	0.519004	0.769256	132466	215124	234387	200394	135561	0.760899	0.375257	0.17477	0.0821096	0.0409009	0.0216594	0.0114877	0.00538477	0.00177154	107876	11.81	0.069	114453	-0.2	21279	2018	11	9	9	36	21	0.0793
2018-10-30 22:54:59	0	0	0	0	0	0	0.00132386	0.00636324	0.0345932	0.155708	0.269901	0.25333	0.236403	0.256001	0.251775	0.276847	0.274018	0.332206	0.343762	0.42987	0.536257	0.768533	129572	208535	222874	185005	121824	0.678391	0.341414	0.161965	0.0760252	0.0356273	0.0160456	0.00653982	0.00221335	0	107575	11.75	0.069	114453	-0.18	21277	2018	11	9	9	36	22	0.0793
2018-10-30 22:54:59	0	0	0	0	0	0	0.00109725	0.00568528	0.0317141	0.14714	0.267645	0.252012	0.233615	0.250945	0.248351	0.273412	0.266188	0.307972	0.303282	0.368883	0.447331	0.631233	105417	177465	21392	210751	161164	0.93631	0.423149	0.164259	0.064	0.0279289	0.0137277	0.00701518	0.00318413	0	107424	11.94	0.069	114077	-0.18	21275	2018	11	9	9	36	23	0.0793
2018-10-30 22:54:59	0	0	0	0	0	0	0.00133689	0.00632264	0.0332098	0.14498	0.252324	0.235863	0.222025	0.243473	0.249348	0.294731	0.321117	0.422253	0.470773	0.596946	0.755151	101231	149673	206567	200616	168969	127396	0.880223	0.565005	0.343446	0.203572	0.116562	0.0629474	0.0299333	0.0111638	0.00260839	106971	11.81	0.069	114678	-0.2	21274	2018	11	9	9	36	24	0.0794
2018-10-30 22:54:59	0	0	0	0	0	0	0	0.00458977	0.0277289	0.139689	0.275212	0.272744	0.261863	0.285907	0.275105	0.288406	0.267545	0.309781	0.320746	0.433908	0.585695	0.90367	161026	264214	283388	231784	149505	0.834445	0.446794	0.250443	0.163297	0.130716	0.124036	0.116804	0.0847175	0.0299824	10682	11.75	0.069	114678	-0.2	21272	2018	11	9	9	36	25	0.0794
2018-10-30 22:54:59	0	0	0	0	0	0	0.0017136	0.00736114	0.0360652	0.14878	0.254548	0.242068	0.226936	0.240878	0.233	0.252704	0.251858	0.307875	0.330138	0.415734	0.522343	0.725371	115088	17921	199964	182955	131868	0.750476	0.349917	0.143748	0.0571429	0.0241191	0.0112966	0.00562194	0.00261581	0	107725	11.94	0.069	114002	-0.2	21272	2018	11	9	9	36	26	0.0794
2018-10-30 22:54:59	0	0	0	0	0	0	0	0.00427081	0.0260654	0.13372	0.272296	0.280561	0.275873	0.300784	0.285181	0.301717	0.293164	0.35505	0.37767	0.475157	0.596261	0.799447	120344	182734	210729	218791	194518	141156	0.806372	0.363773	0.138743	0.0479643	0.016336	0.00553247	0.00180064	0	107047	11.8	0.069	114378	-0.19	21.27	2018	11	9	9	36	27	0.0794
2018-10-30 22:54:59	0	0	0	0	0	0	0	0.00499858	0.0294824	0.143304	0.26731	0.253999	0.239106	0.263302	0.268498	0.309346	0.316695	0.38361	0.388344	0.470147	0.567166	0.760411	116766	173269	183615	168519	138379	109445	0.925907	0.928272	115944	16765	213997	174829	0.705043	0.131902	107197	11.75	0.069	114603	-0.19	21269	2018	11	9	9	36	28	0.0794
2018-10-30 22:54:59	0	0	0	0	0	0	0.00179616	0.00779722	0.038836	0.159764	0.259119	0.234179	0.215718	0.235697	0.243095	0.280331	0.286719	0.34805	0.357045	0.44339	0.549539	0.766245	120887	176328	176577	147761	105349	0.666081	0.38322	0.207172	0.105633	0.0500223	0.0213954	0.00795674	0.00240551	0	108404	11.93	0.069	114302	-0.2	21268	2018	11	9	9	36	29	0.0794
2018-10-30 22:54:59	0	0	0	0	0	0	0	0.0049384	0.0290576	0.142975	0.271252	0.266761	0.252267	0.266558	0.248685	0.263575	0.259975	0.32461	0.35571	0.467258	0.6125	0.88361	144945	222474	23226	198635	140477	0.848675	0.463501	0.241817	0.124565	0.0639021	0.0304873	0.0124047	0.00384819	0	107047	11.79	0.069	114152	-0.2	21266	2018	11	9	9	36	30	0.0794
2018-10-30 22:54:59	0	0	0	0	0	0	0.00153509	0.00746159	0.0389137	0.166387	0.277526	0.250453	0.232739	0.258809	0.26929	0.309317	0.308026	0.361418	0.355931	0.435104	0.530051	0.76147	129829	21546	247279	230487	176741	118797	0.729407	0.418926	0.225805	0.114472	0.0545572	0.0230191	0.007923	0.00185656	107424	11.75	0.069	113926	-0.2	21265	2018	11	9	9	36	31	0.0794
2018-10-30 22:54:59	0	0	0	0	0	0	0.00121006	0.00592458	0.0326353	0.149788	0.268368	0.258238	0.241514	0.255212	0.242026	0.258145	0.251029	0.299673	0.307882	0.386119	0.482744	0.699554	119325	200275	235894	226888	173348	107828	0.588434	0.309057	0.166379	0.0915729	0.0483833	0.0214987	0.00735071	0.00174076	107725	11.91	0.069	114603	-0.2	21263	2018	11	9	9	36	32	0.0794
2018-10-30 22:54:59	0	0	0	0	0	0	0	0.00520292	0.0313101	0.155749	0.298793	0.288882	0.276335	0.30817	0.314311	0.355234	0.353144	0.414234	0.406673	0.482102	0.569928	0.748627	113137	166342	175895	162441	13736	114469	0.987283	0.899918	0.854873	0.800942	0.647819	0.371009	0.127864	0.0247561	105915	11.78	0.069	114227	-0.2	21262	2018	11	9	9	36	33	0.0794
2018-10-30 22:54:59	0	0	0	0	0	0	0	0.00472772	0.0288693	0.147564	0.290615	0.291119	0.281051	0.307997	0.298761	0.322138	0.312388	0.372977	0.384229	0.490249	0.624518	0.893792	145514	218287	218679	17533	114479	0.641284	0.330109	0.166158	0.0871909	0.0489663	0.027367	0.0136379	0.00496289	0.00103738	106745	11.75	0.069	114077	-0.2	21262	2018	11	9	9	36	34	0.0794
2018-10-30 22:54:59	0	0	0	0	0	0	0.00199049	0.00833335	0.0422667	0.176482	0.281697	0.251813	0.229598	0.248629	0.253069	0.290418	0.297752	0.366828	0.381583	0.478829	0.598668	0.859495	14463	229023	241436	204857	148598	101709	0.717401	0.585024	0.611128	0.894003	169305	317619	362111	143108	105387	11.91	0.069	114227	-0.2	21261	2018	11	9	9	36	35	0.0794
2018-10-30 22:54:59	0	0	0	0	0	0	0	0.0038579	0.0251821	0.137859	0.289755	0.298192	0.286252	0.304743	0.286585	0.307115	0.303388	0.370282	0.392494	0.501687	0.640256	0.905844	147562	225391	227581	174497	100929	0.465614	0.18734	0.0727863	0.0290815	0.0122361	0.00516132	0.00210985	0	0	107348	11.78	0.069	114378	-0.2	21259	2018	11	9	9	36	36	0.0794
2018-10-30 22:54:59	0	0	0	0	0	0	0	0.00386493	0.0247251	0.132895	0.280457	0.290023	0.285221	0.314481	0.305171	0.323879	0.301861	0.336392	0.322304	0.38127	0.448255	0.576075	0.836547	12943	168295	226029	301631	37351	407114	381583	310902	215719	124241	0.572495	0.196554	0.0435269	10599	11.75	0.069	114077	-0.2	21258	2018	11	9	9	36	37	0.0794
2018-10-30 22:54:59	0	0	0	0	0	0	0	0.00411528	0.0269828	0.146586	0.300635	0.301236	0.288009	0.311478	0.304953	0.347202	0.367741	0.47454	0.517566	0.650653	0.816949	105263	146368	187606	172877	144144	109256	0.737363	0.439623	0.23667	0.117628	0.0555264	0.0258795	0.0121933	0.00543697	0.00180131	106669	11.9	0.069	114378	-0.2	21257	2018	11	9	9	36	38	0.0794
2018-10-30 22:54:59	0	0	0	0	0	0	0	0.00527575	0.0315066	0.154497	0.282459	0.262088	0.243314	0.270334	0.282764	0.334962	0.347811	0.416394	0.404487	0.46632	0.535255	0.706396	111143	180539	217342	231282	215214	174811	123524	0.773722	0.435003	0.227681	0.111398	0.0474444	0.014955	0.00297027	10765	11.76	0.069	114152	-0.2	21256	2018	11	9	9	36	39	0.0794
2018-10-30 22:54:59	0	0	0	0	0	0	0	0.00495853	0.0294992	0.147298	0.287618	0.284994	0.264999	0.273974	0.254079	0.268072	0.26012	0.309506	0.320876	0.406628	0.513944	0.74132	125179	208197	240707	220399	158837	0.964855	0.547391	0.317102	0.202194	0.143775	0.107667	0.0735454	0.0369176	0.0107051	106292	11.93	0.069	114302	-0.2	21255	2018	11	9	9	36	40	0.0794
2018-10-30 22:54:59	0	0	0	0	0	0	0	0.00463833	0.0281306	0.141784	0.276717	0.270413	0.255082	0.275871	0.271835	0.301174	0.298135	0.352237	0.353598	0.436158	0.536839	0.754886	123319	192771	206537	178042	120737	0.658521	0.306041	0.129925	0.0553181	0.0244982	0.0114149	0.00525264	0.00203364	0	10765	11.89	0.069	113776	-0.2	21253	2018	11	9	9	36	41	0.0794
2018-10-30 22:54:59	0	0	0	0	0	0	0.0019553	0.00815418	0.0397098	0.160707	0.26012	0.237541	0.219459	0.237413	0.239666	0.268978	0.270162	0.324145	0.331767	0.409798	0.505293	0.702398	111433	16772	175272	147999	0.981109	0.501305	0.200087	0.0671116	0.0209604	0.00682901	0.0024995	0.00113792	0	0	107348	11.75	0.069	113776	-0.21	21253	2018	11	9	9	36	42	0.0794
2018-10-30 22:54:59	0	0	0	0	0	0	0.00132854	0.00645548	0.0351644	0.159457	0.283472	0.270574	0.258486	0.287184	0.292417	0.336092	0.346452	0.42704	0.441523	0.5389	0.655934	0.895329	139846	209687	221062	196161	148428	10017	0.639283	0.414642	0.286409	0.214341	0.162288	0.111858	0.0574908	0.0157862	10682	11.93	0.069	114077	-0.2	21252	2018	11	9	9	36	43	0.0794
2018-10-30 22:54:59	0	0	0	0	0	0	0.00114798	0.00572661	0.0318976	0.14862	0.273772	0.267956	0.258765	0.288521	0.291097	0.3235	0.319948	0.378982	0.380352	0.458793	0.552183	0.752042	118643	181244	194347	171161	120649	0.693933	0.352187	0.175723	0.09499	0.0579916	0.0379474	0.0229837	0.0101644	0.00254364	107348	11.88	0.069	114077	-0.2	21251	2018	11	9	9	36	44	0.0794
2018-10-30 22:54:59	0	0	0	0	0	0	0.00129437	0.00629496	0.0334684	0.148334	0.262356	0.249433	0.236843	0.260465	0.261144	0.29358	0.299658	0.371304	0.39344	0.494715	0.620828	0.872579	141452	216176	219788	167965	0.922456	0.362568	0.105408	0.0245393	0.00519599	0.00113955	0	0	0	0	106518	11.76	0.069	113701	-0.2	21.25	2018	11	9	9	36	45	0.0793
2018-10-30 22:54:59	0	0	0	0	0	0	0.00126819	0.00666024	0.0375537	0.17326	0.299839	0.275153	0.253343	0.274116	0.271618	0.301137	0.29786	0.360511	0.373489	0.472801	0.597407	0.837452	134419	202159	207448	175988	126143	0.808462	0.491398	0.298717	0.185427	0.114092	0.0639686	0.0307996	0.0110878	0.00249309	106896	11.93	0.069	114077	-0.22	21249	2018	11	9	9	36	46	0.0793
2018-10-30 22:54:59	0	0	0	0	0	0	0.00140165	0.00665447	0.0354811	0.158005	0.278958	0.266486	0.251096	0.270272	0.262758	0.28425	0.279089	0.336376	0.352237	0.446074	0.563673	0.788723	125362	192135	209916	193716	148393	0.950614	0.529496	0.278023	0.151102	0.0897324	0.056292	0.0315319	0.0127298	0.00330831	107273	11.88	0.069	113776	-0.2	21248	2018	11	9	9	36	47	0.0794
2018-10-30 22:54:59	0	0	0	0	0	0	0.0011521	0.00572937	0.0316735	0.146132	0.264789	0.25516	0.243189	0.270204	0.276132	0.314316	0.317082	0.378286	0.378667	0.45326	0.540895	0.737413	118385	189243	214045	197758	147959	0.930577	0.529667	0.296605	0.172721	0.103392	0.0584346	0.0287341	0.0108465	0.00252144	106292	11.75	0.069	114227	-0.2	21247	2018	11	9	9	36	48	0.0794
2018-10-30 22:54:59	0	0	0	0	0	0	0.00124504	0.00609742	0.0335895	0.154624	0.28022	0.267736	0.248415	0.261173	0.252463	0.284003	0.298389	0.380009	0.408182	0.497523	0.605033	0.806077	122121	180942	191847	17166	125836	0.751827	0.382551	0.178984	0.083053	0.0390491	0.0177413	0.00739851	0.00261927	0	106141	11.94	0.069	114152	-0.22	21246	2018	11	9	9	36	49	0.0794
2018-10-30 22:54:59	0	0	0	0	0	0	0	0.00468965	0.0290396	0.148131	0.282222	0.268365	0.248587	0.267751	0.267369	0.309053	0.326263	0.41506	0.445562	0.551459	0.681214	0.890037	131476	190708	197307	165858	11019	0.600669	0.295498	0.148862	0.0867828	0.0616555	0.0484009	0.034414	0.0172883	0.00468724	107122	11.86	0.069	113776	-0.21	21245	2018	11	9	9	36	50	0.0794
2018-10-30 22:54:59	0	0	0	0	0	0	0.00229122	0.00866403	0.0416609	0.166998	0.265137	0.236773	0.21411	0.227914	0.22771	0.253443	0.252306	0.300887	0.306511	0.381033	0.472915	0.670004	108543	161794	16269	13473	0.939804	0.572867	0.314612	0.165488	0.0879752	0.048441	0.0268342	0.0142308	0.0061539	0.00172621	108178	11.76	0.069	114152	-0.23	21244	2018	11	9	9	36	51	0.0794
2018-10-30 22:54:59	0	0	0	0	0	0	0	0.00504769	0.0298136	0.147879	0.28571	0.283189	0.273151	0.303004	0.30543	0.344702	0.347922	0.418874	0.424378	0.505599	0.600867	0.785425	116877	172308	187083	179309	148721	104922	0.625139	0.318615	0.142762	0.0576867	0.0212467	0.00725378	0.00215664	0	106368	11.91	0.069	113626	-0.2	21244	2018	11	9	9	36	52	0.0794
2018-10-30 22:54:59	0	0	0	0	0	0	0.00169306	0.00781757	0.0403173	0.170001	0.274197	0.239542	0.21142	0.221542	0.224211	0.266021	0.291083	0.381052	0.417099	0.507741	0.616555	0.792549	114763	163802	170285	155695	127429	0.947016	0.634761	0.381593	0.214684	0.115115	0.0587182	0.0275839	0.011079	0.0031408	106745	11.85	0.069	113926	-0.19	21243	2018	11	9	9	36	53	0.0794
2018-10-30 22:54:59	0	0	0	0	0	0	0.00121349	0.00606511	0.0330939	0.151239	0.274144	0.262798	0.245298	0.263347	0.263383	0.303524	0.322297	0.410517	0.444649	0.555206	0.691768	0.925985	138319	199229	206218	180197	12865	0.743224	0.35048	0.139511	0.0511819	0.0187288	0.00716134	0.0029367	0.00120108	0	10599	11.75	0.069	113701	-0.2	21242	2018	11	9	9	36	54	0.0794
2018-10-30 22:54:59	0	0	0	0	0	0	0.00173302	0.00769631	0.0396262	0.168706	0.28214	0.258845	0.242824	0.272151	0.288828	0.344229	0.360851	0.435169	0.425659	0.47721	0.532802	0.687023	106249	174198	214959	224447	187105	124708	0.701575	0.363873	0.18425	0.0959906	0.0492777	0.0229488	0.00812182	0.00196539	106217	11.94	0.069	113701	-0.22	21241	2018	11	9	9	36	55	0.0794
2018-10-30 22:54:59	0	0	0	0	0	0	0.00121696	0.00593861	0.0316758	0.142476	0.260033	0.254903	0.241948	0.257789	0.244536	0.256881	0.245754	0.291092	0.304512	0.392902	0.506244	0.739934	123705	189579	191458	151288	0.94803	0.490349	0.219561	0.0903554	0.0371624	0.0157554	0.00696523	0.00309093	0.00128616	0	108178	11.85	0.069	11355	-0.2	21.24	2018	11	9	9	36	56	0.0794
2018-10-30 22:54:59	0	0	0	0	0	0	0.00163319	0.00726495	0.036734	0.154678	0.260857	0.243828	0.230246	0.255468	0.262839	0.298469	0.29843	0.354718	0.357811	0.437128	0.53269	0.750313	123534	193593	205532	173072	11937	0.717506	0.39239	0.20415	0.103518	0.0531136	0.0261935	0.0117571	0.00439288	0.00112438	106594	11.76	0.069	113851	-0.21	21241	2018	11	9	9	36	57	0.0794
2018-10-30 22:54:59	0	0	0	0	0	0	0.00135503	0.00675702	0.0364896	0.162788	0.281922	0.262451	0.246035	0.273757	0.287077	0.339508	0.356833	0.43959	0.450341	0.545836	0.660259	0.88188	13284	187499	184852	155774	110975	0.656299	0.32029	0.136927	0.056733	0.0249433	0.0124598	0.0068733	0.00345624	0.00117066	105538	11.95	0.069	114152	-0.21	21241	2018	11	9	9	36	58	0.0794
2018-10-30 22:54:59	0	0	0	0	0	0	0	0.00542701	0.0319542	0.155241	0.285252	0.269682	0.24849	0.26659	0.267531	0.309517	0.325313	0.405965	0.423442	0.510887	0.615025	0.802157	119371	1772	19172	175034	125505	0.672588	0.268389	0.0861608	0.0250551	0.00734911	0.00236607	0	0	0	106971	11.85	0.069	113475	-0.22	21242	2018	11	9	9	36	59	0.0794
2018-10-30 22:54:59	0	0	0	0	0	0	0.00149999	0.00699701	0.0368447	0.159655	0.265839	0.241494	0.222929	0.246664	0.260141	0.310975	0.332066	0.414579	0.425869	0.508451	0.605717	0.790488	116129	161556	15993	138897	107754	0.750799	0.461396	0.24861	0.120586	0.0564905	0.0267095	0.012887	0.00571854	0.0018269	107197	11.76	0.069	113626	-0.22	21242	2018	11	9	9	37	0	0.0794
2018-10-30 22:54:59	0	0	0	0	0	0	0	0.00509755	0.0298716	0.146428	0.279541	0.271719	0.252513	0.263706	0.249344	0.273097	0.279269	0.350382	0.376022	0.46218	0.566575	0.756411	115955	181054	209086	204413	159418	0.968137	0.4647	0.188139	0.0700254	0.0261333	0.0100117	0.00378665	0.0012041	0	106896	11.93	0.069	113475	-0.21	21241	2018	11	9	9	37	1	0.0794
2018-10-30 22:54:59	0	0	0	0	0	0	0.00146901	0.00651481	0.0352512	0.159514	0.280422	0.266509	0.249156	0.267969	0.263623	0.292207	0.292434	0.352177	0.356305	0.436427	0.533229	0.760597	126885	201405	215539	185114	128651	0.753411	0.389601	0.190861	0.0942529	0.0483511	0.0253548	0.012574	0.00532469	0.00140394	106669	11.83	0.069	114077	-0.2	21.24	2018	11	9	9	37	2	0.0794
2018-10-30 22:54:59	0	0	0	0	0	0	0.00155506	0.00730841	0.038701	0.168805	0.28455	0.257359	0.234441	0.25005	0.248305	0.277937	0.279577	0.338818	0.348906	0.424784	0.515944	0.691241	105562	159205	177536	175544	147884	101811	0.56427	0.262573	0.1083	0.0423652	0.0157576	0.00540598	0.00157034	0	106896	11.75	0.069	1134	-0.22	21.24	2018	11	9	9	37	3	0.0794
2018-10-30 22:54:59	0	0	0	0	0	0	0	0.00529241	0.0316972	0.156404	0.292554	0.277063	0.25904	0.281313	0.278033	0.306097	0.301522	0.360241	0.368692	0.455106	0.560832	0.743538	110938	159936	167546	154784	124409	0.863832	0.529888	0.310965	0.19648	0.142731	0.113016	0.081689	0.0411688	0.0110628	106745	11.96	0.069	113776	-0.22	21238	2018	11	9	9	37	4	0.0794
2018-10-30 22:54:59	0	0	0	0	0	0	0.00162479	0.00705755	0.0364238	0.157645	0.27257	0.257113	0.240393	0.258737	0.254861	0.277952	0.27185	0.323065	0.33186	0.413071	0.513044	0.725238	11911	189658	209212	183323	124281	0.658898	0.282703	0.103607	0.0342503	0.0109942	0.00358644	0.00122812	0	0	106669	11.83	0.069	113926	-0.21	21237	2018	11	9	9	37	5	0.0794
2018-10-30 22:54:59	0	0	0	0	0	0	0	0.00510032	0.0295113	0.142396	0.269233	0.263751	0.254929	0.286103	0.295041	0.337346	0.338708	0.39476	0.380332	0.432239	0.489347	0.62833	0.946857	150197	183569	203365	195114	154222	0.968561	0.491931	0.221367	0.0949749	0.0407465	0.0170841	0.00651481	0.00178068	106669	11.75	0.069	113475	-0.22	21236	2018	11	9	9	37	6	0.0794
2018-10-31 01:54:59	0	0	0	0	0	0	0.00102545	0.00569046	0.0325573	0.153472	0.279463	0.261347	0.24265	0.263521	0.265735	0.302657	0.308617	0.371554	0.371862	0.437142	0.512485	0.683196	108186	173094	196433	17937	127107	0.705261	0.315125	0.119744	0.042484	0.0155515	0.00633795	0.00274788	0.00110126	0	106518	11.83	0.0618	114528	-0.18	21295	2018	11	9	9	36	7	0.0768
2018-10-31 01:54:59	0	0	0	0	0	0	0.00141612	0.00693142	0.0378381	0.169191	0.285102	0.258926	0.238732	0.262797	0.269936	0.315403	0.33261	0.423927	0.45385	0.561015	0.691336	0.909929	134581	196943	215327	215856	195302	154218	101846	0.56242	0.26624	0.112607	0.0431282	0.0148061	0.00420831	0	106518	11.92	0.0687	114528	-0.18	21292	2018	11	9	9	36	8	0.0791
2018-10-31 01:54:59	0	0	0	0	0	0	0	0.003472	0.0223461	0.122142	0.269318	0.292767	0.299238	0.334467	0.315479	0.31976	0.288524	0.320273	0.31177	0.381788	0.466085	0.66451	112612	194869	24441	255048	208901	125856	0.547146	0.178187	0.0489396	0.0130937	0.00396319	0.0014556	0	0	108103	11.84	0.0689	114528	-0.18	21291	2018	11	9	9	36	9	0.0792
2018-10-31 01:54:59	0	0	0	0	0	0	0.00175294	0.00725991	0.0366594	0.154855	0.258511	0.244936	0.231191	0.255536	0.260734	0.295959	0.299771	0.36352	0.373722	0.459335	0.563463	0.783137	125535	189778	193195	153342	0.92818	0.438828	0.173964	0.0638309	0.0243698	0.0104873	0.00526594	0.00303375	0.00173205	0	107725	11.76	0.0689	114453	-0.19	21.29	2018	11	9	9	36	10	0.0792
2018-10-31 01:54:59	0	0	0	0	0	0	0	0.00375198	0.0245165	0.131345	0.262143	0.254001	0.241664	0.266208	0.262947	0.290814	0.286474	0.346642	0.360413	0.468301	0.606898	0.85985	136244	19583	191832	164172	133487	112645	10505	110821	125188	128287	0.964209	0.470853	0.142766	0.0266809	106745	11.95	0.069	114603	-0.19	21.29	2018	11	9	9	36	11	0.0793
2018-10-31 01:54:59	0	0	0	0	0	0	0.00108361	0.00538919	0.0304325	0.143909	0.264932	0.255675	0.241652	0.265172	0.269075	0.308094	0.316832	0.387801	0.400085	0.488692	0.595732	0.797162	120319	170568	168816	143412	107817	0.745488	0.487589	0.312457	0.201296	0.133278	0.089545	0.0586837	0.0334107	0.0141222	108932	11.83	0.069	114302	-0.18	21.29	2018	11	9	9	36	12	0.0793
2018-10-31 01:54:59	0	0	0	0	0	0	0.0016803	0.00733211	0.0377339	0.162252	0.275986	0.257929	0.236317	0.247414	0.240333	0.267067	0.274538	0.343165	0.367745	0.461897	0.579263	0.797282	123511	17861	17812	146693	0.995047	0.557872	0.258761	0.099424	0.0316536	0.00853219	0.00208183	0	0	0	107499	11.76	0.069	114829	-0.17	21289	2018	11	9	9	36	13	0.0793
2018-10-31 01:54:59	0	0	0	0	0	0	0.00220817	0.00843861	0.0400468	0.158199	0.250227	0.224983	0.205907	0.221219	0.221393	0.247768	0.250068	0.306422	0.322295	0.409539	0.519454	0.747019	122011	18112	178573	142921	0.969043	0.593782	0.343607	0.193225	0.108941	0.0619436	0.0337075	0.0160818	0.00602119	0.00149332	107725	11.96	0.069	114528	-0.19	21289	2018	11	9	9	36	14	0.0793
2018-10-31 01:54:59	0	0	0	0	0	0	0.00121034	0.00612647	0.0336739	0.153244	0.269771	0.248078	0.225483	0.237736	0.234715	0.270275	0.287763	0.371544	0.406475	0.508057	0.633277	0.862452	134705	20582	221097	196668	14458	0.892532	0.472984	0.227239	0.107471	0.0550005	0.0320034	0.0208619	0.0125626	0.00459375	107575	11.83	0.069	114227	-0.2	21288	2018	11	9	9	36	15	0.0793
2018-10-31 01:54:59	0	0	0	0	0	0	0.00136411	0.00667215	0.0361367	0.160944	0.274252	0.250649	0.230631	0.249812	0.252418	0.287284	0.291434	0.351159	0.353724	0.425451	0.51055	0.692385	108871	165835	176905	157834	118908	0.770366	0.425548	0.199555	0.0821661	0.032343	0.0128205	0.00505388	0.00170491	0	108178	11.75	0.069	114528	-0.18	21287	2018	11	9	9	36	16	0.0793
2018-10-31 01:54:59	0	0	0	0	0	0	0.00100439	0.00552579	0.032388	0.158059	0.299597	0.291074	0.275257	0.29517	0.283849	0.304558	0.295156	0.352659	0.366206	0.46034	0.576953	0.794455	123779	188041	210364	214178	199929	171739	137755	103845	0.722398	0.432883	0.205064	0.0744521	0.019592	0.00341895	10682	11.95	0.069	114754	-0.2	21285	2018	11	9	9	36	17	0.0793
2018-10-31 01:54:59	0	0	0	0	0	0	0	0.0039303	0.024222	0.126226	0.265373	0.277625	0.279585	0.317727	0.323282	0.364153	0.358585	0.408122	0.382487	0.426255	0.471896	0.634831	106351	201461	29599	37819	390879	299058	16101	0.631455	0.201156	0.0591049	0.0176343	0.00599709	0.00225027	0	106594	11.82	0.069	114528	-0.18	21284	2018	11	9	9	36	18	0.0793
2018-10-31 01:54:59	0	0	0	0	0	0	0	0.00414271	0.0252738	0.129828	0.266664	0.272811	0.265631	0.287742	0.277738	0.30539	0.30719	0.374164	0.388046	0.471966	0.572068	0.795169	131082	221097	264539	250525	177257	0.919835	0.359026	0.111145	0.0298518	0.00745816	0.00184713	0	0	0	106745	11.76	0.069	114754	-0.2	21282	2018	11	9	9	36	19	0.0793
2018-10-31 01:54:59	0	0	0	0	0	0	0.00103048	0.00546857	0.0307065	0.144239	0.269061	0.266061	0.260521	0.298375	0.313716	0.359958	0.358733	0.418296	0.411589	0.48693	0.574512	0.753552	113052	170264	192073	189229	154815	102075	0.549706	0.254438	0.109136	0.0449502	0.0177444	0.00624322	0.00185195	0	106594	11.95	0.069	114302	-0.19	21281	2018	11	9	9	36	20	0.0793
2018-10-31 01:54:59	0	0	0	0	0	0	0.00118841	0.00634383	0.0350453	0.159973	0.284953	0.263744	0.239168	0.246366	0.229661	0.243152	0.237214	0.287088	0.304083	0.397685	0.519004	0.769256	132466	215124	234387	200394	135561	0.760899	0.375257	0.17477	0.0821096	0.0409009	0.0216594	0.0114877	0.00538477	0.00177154	107876	11.81	0.069	114453	-0.2	21279	2018	11	9	9	36	21	0.0793
2018-10-31 01:54:59	0	0	0	0	0	0	0.00132386	0.00636324	0.0345932	0.155708	0.269901	0.25333	0.236403	0.256001	0.251775	0.276847	0.274018	0.332206	0.343762	0.42987	0.536257	0.768533	129572	208535	222874	185005	121824	0.678391	0.341414	0.161965	0.0760252	0.0356273	0.0160456	0.00653982	0.00221335	0	107575	11.75	0.069	114453	-0.18	21277	2018	11	9	9	36	22	0.0793
2018-10-31 01:54:59	0	0	0	0	0	0	0.00109725	0.00568528	0.0317141	0.14714	0.267645	0.252012	0.233615	0.250945	0.248351	0.273412	0.266188	0.307972	0.303282	0.368883	0.447331	0.631233	105417	177465	21392	210751	161164	0.93631	0.423149	0.164259	0.064	0.0279289	0.0137277	0.00701518	0.00318413	0	107424	11.94	0.069	114077	-0.18	21275	2018	11	9	9	36	23	0.0793
2018-10-31 01:54:59	0	0	0	0	0	0	0.00133689	0.00632264	0.0332098	0.14498	0.252324	0.235863	0.222025	0.243473	0.249348	0.294731	0.321117	0.422253	0.470773	0.596946	0.755151	101231	149673	206567	200616	168969	127396	0.880223	0.565005	0.343446	0.203572	0.116562	0.0629474	0.0299333	0.0111638	0.00260839	106971	11.81	0.069	114678	-0.2	21274	2018	11	9	9	36	24	0.0794
2018-10-31 01:54:59	0	0	0	0	0	0	0	0.00458977	0.0277289	0.139689	0.275212	0.272744	0.261863	0.285907	0.275105	0.288406	0.267545	0.309781	0.320746	0.433908	0.585695	0.90367	161026	264214	283388	231784	149505	0.834445	0.446794	0.250443	0.163297	0.130716	0.124036	0.116804	0.0847175	0.0299824	10682	11.75	0.069	114678	-0.2	21272	2018	11	9	9	36	25	0.0794
2018-10-31 01:54:59	0	0	0	0	0	0	0.0017136	0.00736114	0.0360652	0.14878	0.254548	0.242068	0.226936	0.240878	0.233	0.252704	0.251858	0.307875	0.330138	0.415734	0.522343	0.725371	115088	17921	199964	182955	131868	0.750476	0.349917	0.143748	0.0571429	0.0241191	0.0112966	0.00562194	0.00261581	0	107725	11.94	0.069	114002	-0.2	21272	2018	11	9	9	36	26	0.0794
2018-10-31 01:54:59	0	0	0	0	0	0	0	0.00427081	0.0260654	0.13372	0.272296	0.280561	0.275873	0.300784	0.285181	0.301717	0.293164	0.35505	0.37767	0.475157	0.596261	0.799447	120344	182734	210729	218791	194518	141156	0.806372	0.363773	0.138743	0.0479643	0.016336	0.00553247	0.00180064	0	107047	11.8	0.069	114378	-0.19	21.27	2018	11	9	9	36	27	0.0794
2018-10-31 01:54:59	0	0	0	0	0	0	0	0.00499858	0.0294824	0.143304	0.26731	0.253999	0.239106	0.263302	0.268498	0.309346	0.316695	0.38361	0.388344	0.470147	0.567166	0.760411	116766	173269	183615	168519	138379	109445	0.925907	0.928272	115944	16765	213997	174829	0.705043	0.131902	107197	11.75	0.069	114603	-0.19	21269	2018	11	9	9	36	28	0.0794
2018-10-31 01:54:59	0	0	0	0	0	0	0.00179616	0.00779722	0.038836	0.159764	0.259119	0.234179	0.215718	0.235697	0.243095	0.280331	0.286719	0.34805	0.357045	0.44339	0.549539	0.766245	120887	176328	176577	147761	105349	0.666081	0.38322	0.207172	0.105633	0.0500223	0.0213954	0.00795674	0.00240551	0	108404	11.93	0.069	114302	-0.2	21268	2018	11	9	9	36	29	0.0794
2018-10-31 01:54:59	0	0	0	0	0	0	0	0.0049384	0.0290576	0.142975	0.271252	0.266761	0.252267	0.266558	0.248685	0.263575	0.259975	0.32461	0.35571	0.467258	0.6125	0.88361	144945	222474	23226	198635	140477	0.848675	0.463501	0.241817	0.124565	0.0639021	0.0304873	0.0124047	0.00384819	0	107047	11.79	0.069	114152	-0.2	21266	2018	11	9	9	36	30	0.0794
2018-10-31 01:54:59	0	0	0	0	0	0	0.00153509	0.00746159	0.0389137	0.166387	0.277526	0.250453	0.232739	0.258809	0.26929	0.309317	0.308026	0.361418	0.355931	0.435104	0.530051	0.76147	129829	21546	247279	230487	176741	118797	0.729407	0.418926	0.225805	0.114472	0.0545572	0.0230191	0.007923	0.00185656	107424	11.75	0.069	113926	-0.2	21265	2018	11	9	9	36	31	0.0794
2018-10-31 01:54:59	0	0	0	0	0	0	0.00121006	0.00592458	0.0326353	0.149788	0.268368	0.258238	0.241514	0.255212	0.242026	0.258145	0.251029	0.299673	0.307882	0.386119	0.482744	0.699554	119325	200275	235894	226888	173348	107828	0.588434	0.309057	0.166379	0.0915729	0.0483833	0.0214987	0.00735071	0.00174076	107725	11.91	0.069	114603	-0.2	21263	2018	11	9	9	36	32	0.0794
2018-10-31 01:54:59	0	0	0	0	0	0	0	0.00520292	0.0313101	0.155749	0.298793	0.288882	0.276335	0.30817	0.314311	0.355234	0.353144	0.414234	0.406673	0.482102	0.569928	0.748627	113137	166342	175895	162441	13736	114469	0.987283	0.899918	0.854873	0.800942	0.647819	0.371009	0.127864	0.0247561	105915	11.78	0.069	114227	-0.2	21262	2018	11	9	9	36	33	0.0794
2018-10-31 01:54:59	0	0	0	0	0	0	0	0.00472772	0.0288693	0.147564	0.290615	0.291119	0.281051	0.307997	0.298761	0.322138	0.312388	0.372977	0.384229	0.490249	0.624518	0.893792	145514	218287	218679	17533	114479	0.641284	0.330109	0.166158	0.0871909	0.0489663	0.027367	0.0136379	0.00496289	0.00103738	106745	11.75	0.069	114077	-0.2	21262	2018	11	9	9	36	34	0.0794
2018-10-31 01:54:59	0	0	0	0	0	0	0.00199049	0.00833335	0.0422667	0.176482	0.281697	0.251813	0.229598	0.248629	0.253069	0.290418	0.297752	0.366828	0.381583	0.478829	0.598668	0.859495	14463	229023	241436	204857	148598	101709	0.717401	0.585024	0.611128	0.894003	169305	317619	362111	143108	105387	11.91	0.069	114227	-0.2	21261	2018	11	9	9	36	35	0.0794
2018-10-31 01:54:59	0	0	0	0	0	0	0	0.0038579	0.0251821	0.137859	0.289755	0.298192	0.286252	0.304743	0.286585	0.307115	0.303388	0.370282	0.392494	0.501687	0.640256	0.905844	147562	225391	227581	174497	100929	0.465614	0.18734	0.0727863	0.0290815	0.0122361	0.00516132	0.00210985	0	0	107348	11.78	0.069	114378	-0.2	21259	2018	11	9	9	36	36	0.0794
2018-10-31 01:54:59	0	0	0	0	0	0	0	0.00386493	0.0247251	0.132895	0.280457	0.290023	0.285221	0.314481	0.305171	0.323879	0.301861	0.336392	0.322304	0.38127	0.448255	0.576075	0.836547	12943	168295	226029	301631	37351	407114	381583	310902	215719	124241	0.572495	0.196554	0.0435269	10599	11.75	0.069	114077	-0.2	21258	2018	11	9	9	36	37	0.0794
2018-10-31 01:54:59	0	0	0	0	0	0	0	0.00411528	0.0269828	0.146586	0.300635	0.301236	0.288009	0.311478	0.304953	0.347202	0.367741	0.47454	0.517566	0.650653	0.816949	105263	146368	187606	172877	144144	109256	0.737363	0.439623	0.23667	0.117628	0.0555264	0.0258795	0.0121933	0.00543697	0.00180131	106669	11.9	0.069	114378	-0.2	21257	2018	11	9	9	36	38	0.0794
2018-10-31 01:54:59	0	0	0	0	0	0	0	0.00527575	0.0315066	0.154497	0.282459	0.262088	0.243314	0.270334	0.282764	0.334962	0.347811	0.416394	0.404487	0.46632	0.535255	0.706396	111143	180539	217342	231282	215214	174811	123524	0.773722	0.435003	0.227681	0.111398	0.0474444	0.014955	0.00297027	10765	11.76	0.069	114152	-0.2	21256	2018	11	9	9	36	39	0.0794
2018-10-31 01:54:59	0	0	0	0	0	0	0	0.00495853	0.0294992	0.147298	0.287618	0.284994	0.264999	0.273974	0.254079	0.268072	0.26012	0.309506	0.320876	0.406628	0.513944	0.74132	125179	208197	240707	220399	158837	0.964855	0.547391	0.317102	0.202194	0.143775	0.107667	0.0735454	0.0369176	0.0107051	106292	11.93	0.069	114302	-0.2	21255	2018	11	9	9	36	40	0.0794
2018-10-31 01:54:59	0	0	0	0	0	0	0	0.00463833	0.0281306	0.141784	0.276717	0.270413	0.255082	0.275871	0.271835	0.301174	0.298135	0.352237	0.353598	0.436158	0.536839	0.754886	123319	192771	206537	178042	120737	0.658521	0.306041	0.129925	0.0553181	0.0244982	0.0114149	0.00525264	0.00203364	0	10765	11.89	0.069	113776	-0.2	21253	2018	11	9	9	36	41	0.0794
2018-10-31 01:54:59	0	0	0	0	0	0	0.0019553	0.00815418	0.0397098	0.160707	0.26012	0.237541	0.219459	0.237413	0.239666	0.268978	0.270162	0.324145	0.331767	0.409798	0.505293	0.702398	111433	16772	175272	147999	0.981109	0.501305	0.200087	0.0671116	0.0209604	0.00682901	0.0024995	0.00113792	0	0	107348	11.75	0.069	113776	-0.21	21253	2018	11	9	9	36	42	0.0794
2018-10-31 01:54:59	0	0	0	0	0	0	0.00132854	0.00645548	0.0351644	0.159457	0.283472	0.270574	0.258486	0.287184	0.292417	0.336092	0.346452	0.42704	0.441523	0.5389	0.655934	0.895329	139846	209687	221062	196161	148428	10017	0.639283	0.414642	0.286409	0.214341	0.162288	0.111858	0.0574908	0.0157862	10682	11.93	0.069	114077	-0.2	21252	2018	11	9	9	36	43	0.0794
2018-10-31 01:54:59	0	0	0	0	0	0	0.00114798	0.00572661	0.0318976	0.14862	0.273772	0.267956	0.258765	0.288521	0.291097	0.3235	0.319948	0.378982	0.380352	0.458793	0.552183	0.752042	118643	181244	194347	171161	120649	0.693933	0.352187	0.175723	0.09499	0.0579916	0.0379474	0.0229837	0.0101644	0.00254364	107348	11.88	0.069	114077	-0.2	21251	2018	11	9	9	36	44	0.0794
2018-10-31 01:54:59	0	0	0	0	0	0	0.00129437	0.00629496	0.0334684	0.148334	0.262356	0.249433	0.236843	0.260465	0.261144	0.29358	0.299658	0.371304	0.39344	0.494715	0.620828	0.872579	141452	216176	219788	167965	0.922456	0.362568	0.105408	0.0245393	0.00519599	0.00113955	0	0	0	0	106518	11.76	0.069	113701	-0.2	21.25	2018	11	9	9	36	45	0.0793
2018-10-31 01:54:59	0	0	0	0	0	0	0.00126819	0.00666024	0.0375537	0.17326	0.299839	0.275153	0.253343	0.274116	0.271618	0.301137	0.29786	0.360511	0.373489	0.472801	0.597407	0.837452	134419	202159	207448	175988	126143	0.808462	0.491398	0.298717	0.185427	0.114092	0.0639686	0.0307996	0.0110878	0.00249309	106896	11.93	0.069	114077	-0.22	21249	2018	11	9	9	36	46	0.0793
2018-10-31 01:54:59	0	0	0	0	0	0	0.00140165	0.00665447	0.0354811	0.158005	0.278958	0.266486	0.251096	0.270272	0.262758	0.28425	0.279089	0.336376	0.352237	0.446074	0.563673	0.788723	125362	192135	209916	193716	148393	0.950614	0.529496	0.278023	0.151102	0.0897324	0.056292	0.0315319	0.0127298	0.00330831	107273	11.88	0.069	113776	-0.2	21248	2018	11	9	9	36	47	0.0794
2018-10-31 01:54:59	0	0	0	0	0	0	0.0011521	0.00572937	0.0316735	0.146132	0.264789	0.25516	0.243189	0.270204	0.276132	0.314316	0.317082	0.378286	0.378667	0.45326	0.540895	0.737413	118385	189243	214045	197758	147959	0.930577	0.529667	0.296605	0.172721	0.103392	0.0584346	0.0287341	0.0108465	0.00252144	106292	11.75	0.069	114227	-0.2	21247	2018	11	9	9	36	48	0.0794
2018-10-31 01:54:59	0	0	0	0	0	0	0.00124504	0.00609742	0.0335895	0.154624	0.28022	0.267736	0.248415	0.261173	0.252463	0.284003	0.298389	0.380009	0.408182	0.497523	0.605033	0.806077	122121	180942	191847	17166	125836	0.751827	0.382551	0.178984	0.083053	0.0390491	0.0177413	0.00739851	0.00261927	0	106141	11.94	0.069	114152	-0.22	21246	2018	11	9	9	36	49	0.0794
2018-10-31 01:54:59	0	0	0	0	0	0	0	0.00468965	0.0290396	0.148131	0.282222	0.268365	0.248587	0.267751	0.267369	0.309053	0.326263	0.41506	0.445562	0.551459	0.681214	0.890037	131476	190708	197307	165858	11019	0.600669	0.295498	0.148862	0.0867828	0.0616555	0.0484009	0.034414	0.0172883	0.00468724	107122	11.86	0.069	113776	-0.21	21245	2018	11	9	9	36	50	0.0794
2018-10-31 01:54:59	0	0	0	0	0	0	0.00229122	0.00866403	0.0416609	0.166998	0.265137	0.236773	0.21411	0.227914	0.22771	0.253443	0.252306	0.300887	0.306511	0.381033	0.472915	0.670004	108543	161794	16269	13473	0.939804	0.572867	0.314612	0.165488	0.0879752	0.048441	0.0268342	0.0142308	0.0061539	0.00172621	108178	11.76	0.069	114152	-0.23	21244	2018	11	9	9	36	51	0.0794
2018-10-31 01:54:59	0	0	0	0	0	0	0	0.00504769	0.0298136	0.147879	0.28571	0.283189	0.273151	0.303004	0.30543	0.344702	0.347922	0.418874	0.424378	0.505599	0.600867	0.785425	116877	172308	187083	179309	148721	104922	0.625139	0.318615	0.142762	0.0576867	0.0212467	0.00725378	0.00215664	0	106368	11.91	0.069	113626	-0.2	21244	2018	11	9	9	36	52	0.0794
2018-10-31 01:54:59	0	0	0	0	0	0	0.00169306	0.00781757	0.0403173	0.170001	0.274197	0.239542	0.21142	0.221542	0.224211	0.266021	0.291083	0.381052	0.417099	0.507741	0.616555	0.792549	114763	163802	170285	155695	127429	0.947016	0.634761	0.381593	0.214684	0.115115	0.0587182	0.0275839	0.011079	0.0031408	106745	11.85	0.069	113926	-0.19	21243	2018	11	9	9	36	53	0.0794
2018-10-31 01:54:59	0	0	0	0	0	0	0.00121349	0.00606511	0.0330939	0.151239	0.274144	0.262798	0.245298	0.263347	0.263383	0.303524	0.322297	0.410517	0.444649	0.555206	0.691768	0.925985	138319	199229	206218	180197	12865	0.743224	0.35048	0.139511	0.0511819	0.0187288	0.00716134	0.0029367	0.00120108	0	10599	11.75	0.069	113701	-0.2	21242	2018	11	9	9	36	54	0.0794
2018-10-31 01:54:59	0	0	0	0	0	0	0.00173302	0.00769631	0.0396262	0.168706	0.28214	0.258845	0.242824	0.272151	0.288828	0.344229	0.360851	0.435169	0.425659	0.47721	0.532802	0.687023	106249	174198	214959	224447	187105	124708	0.701575	0.363873	0.18425	0.0959906	0.0492777	0.0229488	0.00812182	0.00196539	106217	11.94	0.069	113701	-0.22	21241	2018	11	9	9	36	55	0.0794
2018-10-31 01:54:59	0	0	0	0	0	0	0.00121696	0.00593861	0.0316758	0.142476	0.260033	0.254903	0.241948	0.257789	0.244536	0.256881	0.245754	0.291092	0.304512	0.392902	0.506244	0.739934	123705	189579	191458	151288	0.94803	0.490349	0.219561	0.0903554	0.0371624	0.0157554	0.00696523	0.00309093	0.00128616	0	108178	11.85	0.069	11355	-0.2	21.24	2018	11	9	9	36	56	0.0794
2018-10-31 01:54:59	0	0	0	0	0	0	0.00163319	0.00726495	0.036734	0.154678	0.260857	0.243828	0.230246	0.255468	0.262839	0.298469	0.29843	0.354718	0.357811	0.437128	0.53269	0.750313	123534	193593	205532	173072	11937	0.717506	0.39239	0.20415	0.103518	0.0531136	0.0261935	0.0117571	0.00439288	0.00112438	106594	11.76	0.069	113851	-0.21	21241	2018	11	9	9	36	57	0.0794
2018-10-31 01:54:59	0	0	0	0	0	0	0.00135503	0.00675702	0.0364896	0.162788	0.281922	0.262451	0.246035	0.273757	0.287077	0.339508	0.356833	0.43959	0.450341	0.545836	0.660259	0.88188	13284	187499	184852	155774	110975	0.656299	0.32029	0.136927	0.056733	0.0249433	0.0124598	0.0068733	0.00345624	0.00117066	105538	11.95	0.069	114152	-0.21	21241	2018	11	9	9	36	58	0.0794
2018-10-31 01:54:59	0	0	0	0	0	0	0	0.00542701	0.0319542	0.155241	0.285252	0.269682	0.24849	0.26659	0.267531	0.309517	0.325313	0.405965	0.423442	0.510887	0.615025	0.802157	119371	1772	19172	175034	125505	0.672588	0.268389	0.0861608	0.0250551	0.00734911	0.00236607	0	0	0	106971	11.85	0.069	113475	-0.22	21242	2018	11	9	9	36	59	0.0794
2018-10-31 01:54:59	0	0	0	0	0	0	0.00149999	0.00699701	0.0368447	0.159655	0.265839	0.241494	0.222929	0.246664	0.260141	0.310975	0.332066	0.414579	0.425869	0.508451	0.605717	0.790488	116129	161556	15993	138897	107754	0.750799	0.461396	0.24861	0.120586	0.0564905	0.0267095	0.012887	0.00571854	0.0018269	107197	11.76	0.069	113626	-0.22	21242	2018	11	9	9	37	0	0.0794
2018-10-31 01:54:59	0	0	0	0	0	0	0	0.00509755	0.0298716	0.146428	0.279541	0.271719	0.252513	0.263706	0.249344	0.273097	0.279269	0.350382	0.376022	0.46218	0.566575	0.756411	115955	181054	209086	204413	159418	0.968137	0.4647	0.188139	0.0700254	0.0261333	0.0100117	0.00378665	0.0012041	0	106896	11.93	0.069	113475	-0.21	21241	2018	11	9	9	37	1	0.0794
2018-10-31 01:54:59	0	0	0	0	0	0	0.00146901	0.00651481	0.0352512	0.159514	0.280422	0.266509	0.249156	0.267969	0.263623	0.292207	0.292434	0.352177	0.356305	0.436427	0.533229	0.760597	126885	201405	215539	185114	128651	0.753411	0.389601	0.190861	0.0942529	0.0483511	0.0253548	0.012574	0.00532469	0.00140394	106669	11.83	0.069	114077	-0.2	21.24	2018	11	9	9	37	2	0.0794
2018-10-31 01:54:59	0	0	0	0	0	0	0.00155506	0.00730841	0.038701	0.168805	0.28455	0.257359	0.234441	0.25005	0.248305	0.277937	0.279577	0.338818	0.348906	0.424784	0.515944	0.691241	105562	159205	177536	175544	147884	101811	0.56427	0.262573	0.1083	0.0423652	0.0157576	0.00540598	0.00157034	0	106896	11.75	0.069	1134	-0.22	21.24	2018	11	9	9	37	3	0.0794
2018-10-31 01:54:59	0	0	0	0	0	0	0	0.00529241	0.0316972	0.156404	0.292554	0.277063	0.25904	0.281313	0.278033	0.306097	0.301522	0.360241	0.368692	0.455106	0.560832	0.743538	110938	159936	167546	154784	124409	0.863832	0.529888	0.310965	0.19648	0.142731	0.113016	0.081689	0.0411688	0.0110628	106745	11.96	0.069	113776	-0.22	21238	2018	11	9	9	37	4	0.0794
2018-10-31 01:54:59	0	0	0	0	0	0	0.00162479	0.00705755	0.0364238	0.157645	0.27257	0.257113	0.240393	0.258737	0.254861	0.277952	0.27185	0.323065	0.33186	0.413071	0.513044	0.725238	11911	189658	209212	183323	124281	0.658898	0.282703	0.103607	0.0342503	0.0109942	0.00358644	0.00122812	0	0	106669	11.83	0.069	113926	-0.21	21237	2018	11	9	9	37	5	0.0794
2018-10-31 01:54:59	0	0	0	0	0	0	0	0.00510032	0.0295113	0.142396	0.269233	0.263751	0.254929	0.286103	0.295041	0.337346	0.338708	0.39476	0.380332	0.432239	0.489347	0.62833	0.946857	150197	183569	203365	195114	154222	0.968561	0.491931	0.221367	0.0949749	0.0407465	0.0170841	0.00651481	0.00178068	106669	11.75	0.069	113475	-0.22	21236	2018	11	9	9	37	6	0.0794
2018-10-31 01:54:59	0	0	0	0	0	0	0	0.00469875	0.0265463	0.128896	0.267338	0.286297	0.289448	0.323506	0.32194	0.362147	0.369965	0.451617	0.476606	0.583674	0.710762	0.967554	152807	255343	331831	386375	391296	334486	237567	143294	0.744606	0.34119	0.133447	0.0467417	0.0143247	0.00376885	106066	11.83	0.0592	11543	-0.18	20993	2018	11	9	9	42	24	0.076
2018-10-31 01:54:59	0	0	0	0	0	0	0	0.00482899	0.0271798	0.13085	0.267217	0.280089	0.279482	0.310674	0.310009	0.350356	0.358938	0.443238	0.477976	0.630853	0.829135	122329	200519	291927	287166	240463	187844	153883	147039	17175	234907	340434	443206	414954	210969	0.434978	106217	11.92	0.0687	115205	-0.2	20992	2018	11	9	9	42	25	0.0791
2018-10-31 01:54:59	0	0	0	0	0	0	0.00104073	0.00550538	0.0298089	0.138337	0.272601	0.28256	0.276223	0.297983	0.287531	0.318751	0.330011	0.418314	0.4657	0.587388	0.736805	0.995239	152752	247724	319419	378533	395063	352324	263624	168835	0.947189	0.46894	0.193208	0.0626657	0.0157932	0.00326464	106669	11.83	0.0688	115656	-0.18	20992	2018	11	9	9	42	26	0.0792
2018-10-31 01:54:59	0	0	0	0	0	0	0	0.00511264	0.0280678	0.13358	0.271858	0.29169	0.293498	0.326599	0.327286	0.372997	0.38576	0.472138	0.496829	0.612804	0.751719	105416	172344	296238	3883	43694	39655	27859	151087	0.65507	0.245235	0.0849948	0.027603	0.00826181	0.00228978	0	106292	11.75	0.0689	11513	-0.2	20991	2018	11	9	9	42	27	0.0792
2018-10-31 01:54:59	0	0	0	0	0	0	0.00178407	0.00733071	0.0343399	0.138765	0.243416	0.246811	0.244162	0.27581	0.284438	0.32681	0.339399	0.419036	0.449748	0.56545	0.708223	0.999686	162129	260035	300159	282973	211068	125665	0.624426	0.282793	0.129451	0.0631867	0.0331124	0.0172104	0.00813471	0.00276171	107952	11.95	0.0689	115731	-0.18	20991	2018	11	9	9	42	28	0.0793
2018-10-31 01:54:59	0	0	0	0	0	0	0.00161109	0.00680471	0.0316463	0.128099	0.236	0.243088	0.237537	0.252984	0.244625	0.272167	0.287246	0.366108	0.411147	0.516832	0.647053	0.878518	133329	208175	25387	275628	249537	177459	0.961468	0.400248	0.135014	0.0389732	0.0104148	0.00300126	0.00103695	0	108103	11.83	0.0689	115731	-0.19	20.99	2018	11	9	9	42	29	0.0793
2018-10-31 01:54:59	0	0	0	0	0	0	0	0.00483466	0.0257698	0.121126	0.256433	0.289199	0.296066	0.319094	0.297219	0.312516	0.307839	0.369827	0.394493	0.498106	0.626493	0.888829	142525	228824	275776	291548	264516	201067	126801	0.67762	0.329306	0.155487	0.0722356	0.0323893	0.0126602	0.00368374	107575	11.76	0.0689	115205	-0.18	20989	2018	11	9	9	42	30	0.0793
2018-10-31 01:54:59	0	0	0	0	0	0	0	0.00286733	0.019375	0.112505	0.265399	0.299702	0.307218	0.341807	0.334343	0.383086	0.414785	0.542465	0.604718	0.744752	0.913048	111656	145203	180013	169279	153377	143642	149461	179256	248871	386555	590102	729259	578603	223051	0.30884	10682	11.94	0.0689	115882	-0.2	20988	2018	11	9	9	42	31	0.0793
2018-10-31 01:54:59	0	0	0	0	0	0	0.00147083	0.00655305	0.0321023	0.134221	0.241069	0.245266	0.245372	0.280562	0.294632	0.346448	0.365769	0.451919	0.475812	0.577886	0.697955	0.911378	131681	192657	226337	258432	28554	302853	305322	283722	229716	155979	0.856057	0.376052	0.128363	0.0309788	10765	11.82	0.0689	115882	-0.18	20987	2018	11	9	9	42	32	0.0793
2018-10-31 01:54:59	0	0	0	0	0	0	0	0.00274995	0.0179081	0.10224	0.247727	0.293519	0.307786	0.341556	0.32408	0.350659	0.353962	0.438626	0.482831	0.639978	0.84506	121151	190942	290664	32646	322073	275718	207324	145588	103057	0.800337	0.659446	0.501821	0.291275	0.11107	0.0232288	107273	11.75	0.0689	115506	-0.19	20986	2018	11	9	9	42	33	0.0793
2018-10-31 01:54:59	0	0	0	0	0	0	0.00134048	0.00622659	0.0310867	0.134103	0.254738	0.267272	0.268339	0.298801	0.300244	0.341205	0.358759	0.4529	0.498103	0.629617	0.793006	108277	163015	236559	255958	248461	217335	173883	131808	0.978789	0.716282	0.494701	0.302933	0.148605	0.0540091	0.0136285	10765	11.94	0.0689	115806	-0.18	20985	2018	11	9	9	42	34	0.0793
2018-10-31 01:54:59	0	0	0	0	0	0	0.00212934	0.00817394	0.0355516	0.135815	0.245296	0.259273	0.262575	0.289452	0.285772	0.314819	0.321423	0.397135	0.439941	0.559847	0.709157	101266	166716	277432	33761	329962	262325	183897	124211	0.868613	0.663337	0.568683	0.504076	0.384831	0.212085	0.0680073	107499	11.81	0.069	115355	-0.2	20985	2018	11	9	9	42	35	0.0793
2018-10-31 01:54:59	0	0	0	0	0	0	0.00105133	0.00523789	0.0275884	0.126564	0.255554	0.275717	0.276298	0.297744	0.280948	0.298098	0.292166	0.34944	0.369977	0.472685	0.600867	0.885255	149468	251616	31643	35563	349213	286862	189649	100785	0.445659	0.174338	0.0630476	0.021117	0.00613136	0.00138443	107348	11.75	0.069	115882	-0.18	20985	2018	11	9	9	42	36	0.0793
2018-10-31 01:54:59	0	0	0	0	0	0	0.00161654	0.00688279	0.03275	0.135822	0.254446	0.266454	0.268375	0.296452	0.288451	0.307351	0.296007	0.343283	0.35209	0.442488	0.553838	0.811696	136342	22596	27628	29458	267727	197355	112943	0.498132	0.177839	0.0556891	0.0168935	0.00551196	0.00202651	0	107801	11.93	0.069	115731	-0.2	20984	2018	11	9	9	42	37	0.0793
2018-10-31 01:54:59	0	0	0	0	0	0	0	0.0048916	0.0270052	0.128929	0.263734	0.283984	0.285182	0.314002	0.311871	0.358189	0.382746	0.485059	0.526119	0.646555	0.790984	106875	164398	259591	312627	333151	29962	215766	121265	0.555836	0.226786	0.0884649	0.0337602	0.0126194	0.00440469	0.00120033	106368	11.8	0.069	115731	-0.2	20984	2018	11	9	9	42	38	0.0793
2018-10-31 01:54:59	0	0	0	0	0	0	0.00252543	0.00876056	0.0370989	0.137867	0.23616	0.244441	0.246029	0.277508	0.286264	0.326862	0.337592	0.407281	0.42457	0.513423	0.617861	0.883863	151146	2625	323593	312214	235825	149639	0.858596	0.461363	0.23728	0.116758	0.057306	0.0297818	0.0162897	0.00654824	108329	11.75	0.069	116032	-0.18	20983	2018	11	9	9	42	39	0.0793
2018-10-31 01:54:59	0	0	0	0	0	0	0.00101116	0.00520643	0.027996	0.128566	0.2467	0.257609	0.260807	0.299962	0.30718	0.346671	0.345145	0.404137	0.401805	0.470057	0.546172	0.73616	1194	214387	305355	387489	416204	366247	260275	154564	0.819894	0.425379	0.211221	0.0918871	0.0297386	0.00717262	10765	11.93	0.069	11543	-0.19	20982	2018	11	9	9	42	40	0.0793
2018-10-31 01:54:59	0	0	0	0	0	0	0.0010134	0.00542016	0.0287158	0.132011	0.26904	0.292087	0.300252	0.340558	0.34204	0.37257	0.353403	0.389898	0.373047	0.43742	0.508783	0.720108	125285	246472	387703	532305	595153	522278	366091	212707	105822	0.459311	0.182066	0.0779985	0.0358404	0.0103318	106141	11.8	0.069	115506	-0.19	20981	2018	11	9	9	42	41	0.0793
2018-10-31 01:54:59	0	0	0	0	0	0	0.00151123	0.00647905	0.0306832	0.127017	0.236882	0.252647	0.260434	0.303578	0.321569	0.378432	0.402899	0.498789	0.530208	0.624323	0.73118	0.903915	123438	177833	213529	251838	282395	289235	266437	224006	179713	136279	0.952328	0.563692	0.252891	0.0681925	107801	11.75	0.069	115731	-0.2	20981	2018	11	9	9	42	42	0.0794
2018-10-31 01:54:59	0	0	0	0	0	0	0.00109209	0.00579505	0.0310499	0.142784	0.277689	0.286957	0.279046	0.301866	0.296622	0.335246	0.351506	0.439353	0.474056	0.581356	0.708968	0.934001	13831	211683	258566	306638	347073	356529	319804	25331	185135	127056	0.779129	0.423101	0.175985	0.0417144	10765	11.92	0.069	115506	-0.2	20.98	2018	11	9	9	42	43	0.0793
2018-10-31 01:54:59	0	0	0	0	0	0	0.00168863	0.00732729	0.0351173	0.144417	0.260378	0.261411	0.257626	0.287786	0.295924	0.344127	0.364883	0.459314	0.497965	0.626176	0.784783	110586	177699	273025	292628	251184	173612	103039	0.577429	0.335953	0.207977	0.133218	0.0809762	0.0446816	0.020111	0.00623159	108932	11.79	0.069	115882	-0.2	20978	2018	11	9	9	42	44	0.0793
2018-10-31 01:54:59	0	0	0	0	0	0	0.0014063	0.00637719	0.031649	0.136362	0.258913	0.272384	0.271806	0.300441	0.302786	0.341895	0.349426	0.418909	0.43397	0.530518	0.645923	0.912653	151102	252415	303496	291564	219521	136447	0.75163	0.384749	0.191385	0.0933883	0.044232	0.0188585	0.00674622	0.00165671	10848	11.74	0.069	115581	-0.21	20978	2018	11	9	9	42	45	0.0793
2018-10-31 01:54:59	0	0	0	0	0	0	0.00263589	0.00921205	0.0392967	0.144901	0.23743	0.237875	0.233901	0.259246	0.261986	0.295936	0.308439	0.389276	0.433476	0.548733	0.692067	0.945621	14419	218908	251356	254006	220541	16365	105921	0.629309	0.368372	0.216626	0.123151	0.0638686	0.0284065	0.00947778	107575	11.92	0.069	116107	-0.19	20977	2018	11	9	9	42	46	0.0793
2018-10-31 01:54:59	0	0	0	0	0	0	0.00130295	0.00623758	0.0330171	0.150647	0.286442	0.295654	0.287325	0.313289	0.313034	0.361268	0.385115	0.487641	0.531606	0.660492	0.817056	109134	163706	247504	286597	298934	277753	235339	190121	152121	115588	0.777837	0.420874	0.171447	0.0503409	0.0106345	10765	11.78	0.069	115581	-0.22	20976	2018	11	9	9	42	47	0.0793
2018-10-31 01:54:59	0	0	0	0	0	0	0.00218972	0.00795779	0.0359689	0.141179	0.244993	0.256343	0.264648	0.310663	0.323605	0.358012	0.347032	0.400748	0.403144	0.494359	0.603441	0.880724	153546	269373	335881	334399	26016	162596	0.853066	0.391901	0.161933	0.0624183	0.0222154	0.00746305	0.0022039	0	107876	11.74	0.069	115806	-0.2	20976	2018	11	9	9	42	48	0.0793
2018-10-31 01:54:59	0	0	0	0	0	0	0	0.00532132	0.0283389	0.13129	0.268849	0.292967	0.295013	0.316678	0.294935	0.308726	0.303717	0.373391	0.418223	0.568165	0.768501	111642	174061	248743	262087	263598	274195	303839	342941	35392	307362	209476	11318	0.534202	0.219217	0.0494876	107197	11.91	0.069	115957	-0.2	20976	2018	11	9	9	42	49	0.0793
2018-10-31 01:54:59	0	0	0	0	0	0	0.00193065	0.0078077	0.0363657	0.147274	0.265484	0.275485	0.274495	0.300853	0.291283	0.309272	0.298631	0.354361	0.378533	0.500377	0.658259	1026	187105	332593	41496	420707	342486	222729	114197	0.475332	0.174541	0.0634922	0.0252693	0.0108931	0.00478158	0.00168898	107725	11.78	0.069	115957	-0.21	20975	2018	11	9	9	42	50	0.0794
2018-10-31 01:54:59	0	0	0	0	0	0	0.00144597	0.0063398	0.0311564	0.133752	0.255382	0.276297	0.286363	0.330361	0.339243	0.381744	0.386084	0.464623	0.488507	0.605241	0.74649	102748	160114	252809	30534	326779	301733	239569	166326	10368	0.594214	0.312346	0.14645	0.0612792	0.0216782	0.00561693	107047	11.75	0.069	115656	-0.2	20975	2018	11	9	9	42	51	0.0793
2018-10-31 01:54:59	0	0	0	0	0	0	0.00179305	0.00743499	0.0344647	0.138359	0.247911	0.259325	0.26515	0.30665	0.31947	0.361374	0.364448	0.434072	0.450244	0.563768	0.704064	100414	162201	245244	257129	214846	14171	0.764869	0.362206	0.163615	0.0772386	0.0415405	0.0266217	0.019445	0.0131347	0.00556663	108178	11.9	0.069	115656	-0.19	20974	2018	11	9	9	42	52	0.0793
2018-10-31 01:54:59	0	0	0	0	0	0	0.00194101	0.00815593	0.039389	0.162584	0.281789	0.277417	0.268296	0.303095	0.32338	0.388616	0.413918	0.503833	0.512099	0.602779	0.705726	0.9293	140016	209483	235753	242732	235812	228091	233635	259563	289701	281366	201204	0.970998	0.283808	0.0489492	107876	11.75	0.069	116032	-0.21	20973	2018	11	9	9	42	53	0.0794
2018-10-31 01:54:59	0	0	0	0	0	0	0.00198039	0.0079482	0.0370856	0.150143	0.269916	0.280157	0.282026	0.318961	0.328649	0.37659	0.387141	0.469535	0.493074	0.609298	0.748802	105118	169551	280446	353516	38741	361016	295416	220695	154124	103515	0.686625	0.459712	0.291762	0.159069	0.0545361	106292	11.73	0.069	115806	-0.21	20973	2018	11	9	9	42	54	0.0793
2018-10-31 01:54:59	0	0	0	0	0	0	0.00147888	0.00660601	0.0323188	0.137717	0.260156	0.276743	0.280672	0.317946	0.328201	0.380079	0.394445	0.474228	0.486057	0.578113	0.683679	0.94668	155593	274014	369246	417168	36727	245293	125427	0.517258	0.18765	0.0662393	0.0252069	0.0109894	0.00516506	0.00198858	106896	11.9	0.069	116032	-0.21	20972	2018	11	9	9	42	55	0.0794
2018-10-31 01:54:59	0	0	0	0	0	0	0.00175023	0.00761902	0.0354133	0.140383	0.244784	0.24238	0.238217	0.267014	0.276991	0.325161	0.351391	0.453461	0.509297	0.640929	0.804216	10554	151387	213531	228306	215327	175675	123927	0.772443	0.436226	0.237417	0.125761	0.0641355	0.0287274	0.0100329	0.00222097	108404	11.75	0.069	116032	-0.21	20971	2018	11	9	9	42	56	0.0794
2018-10-31 01:54:59	0	0	0	0	0	0.00129498	0.00353281	0.0116838	0.0477961	0.16704	0.254883	0.238808	0.222923	0.239947	0.244034	0.285102	0.31088	0.407386	0.464213	0.598823	0.770361	109111	173461	254056	253573	203645	137262	0.832854	0.48701	0.290878	0.181788	0.121537	0.0803846	0.0489384	0.0238257	0.00821656	108178	11.92	0.069	115656	-0.2	20971	2018	11	9	9	42	57	0.0793
2018-10-31 01:54:59	0	0	0	0	0	0	0.00110378	0.00563753	0.0301796	0.13885	0.270913	0.281394	0.27562	0.297851	0.290599	0.329231	0.352424	0.455653	0.511364	0.634641	0.783764	0.99916	139606	202698	240653	278821	306763	31075	283794	230901	170321	115608	0.705624	0.345065	0.113612	0.0217101	107801	11.88	0.069	115806	-0.22	20.97	2018	11	9	9	42	58	0.0793
2018-10-31 01:54:59	0	0	0	0	0	0	0.00216557	0.00838867	0.038092	0.148031	0.250768	0.246687	0.240869	0.268862	0.274437	0.307607	0.305642	0.36008	0.368353	0.456251	0.562307	0.82417	143794	257992	339189	362347	294355	177137	0.807222	0.294136	0.0914443	0.0263232	0.00729033	0.00200722	0	0	108706	11.75	0.069	116258	-0.2	20969	2018	11	9	9	42	59	0.0793
2018-10-31 01:54:59	0	0	0	0	0	0	0.00177248	0.00730736	0.0340452	0.137908	0.251044	0.263288	0.268477	0.30735	0.317782	0.360042	0.365828	0.435777	0.449914	0.529522	0.619443	0.7879	113149	178628	240292	314811	374252	378497	314792	214569	126465	0.668442	0.329298	0.149821	0.0593432	0.0170726	108706	11.93	0.069	115731	-0.2	20968	2018	11	9	9	43	0	0.0793
2018-10-31 01:54:59	0	0	0	0	0	0	0.00189947	0.00762706	0.0353814	0.142037	0.254354	0.258411	0.254571	0.279293	0.282191	0.32338	0.338989	0.421596	0.455228	0.570602	0.711967	101056	16367	264566	316173	327012	28683	205712	115934	0.509537	0.18746	0.0637867	0.0223544	0.00848451	0.00339096	0.00124319	108631	11.88	0.069	116032	-0.2	20968	2018	11	9	9	43	1	0.0794
2018-10-31 01:54:59	0	0	0	0	0	0	0.00120941	0.00590845	0.0302065	0.132945	0.254065	0.263753	0.262648	0.290785	0.29014	0.323852	0.327535	0.391427	0.402443	0.477227	0.562575	0.736783	11051	179701	242565	316222	374865	3695	273793	142172	0.517855	0.145188	0.034818	0.007934	0.00177574	0	108555	11.75	0.069	116333	-0.22	20968	2018	11	9	9	43	2	0.0793
2018-10-31 01:54:59	0	0	0	0	0	0	0.00141748	0.00620163	0.0301492	0.127011	0.237942	0.25222	0.262358	0.308323	0.325119	0.371815	0.373595	0.435862	0.434293	0.507913	0.590309	0.790776	124228	209151	279471	336909	352486	317204	252247	182743	123276	0.768014	0.432238	0.194118	0.0611885	0.0118856	10848	11.93	0.069	115731	-0.19	20968	2018	11	9	9	43	3	0.0793
2018-10-31 01:54:59	0	0	0	0	0	0	0	0.00519694	0.0280457	0.131702	0.270967	0.296574	0.302818	0.336278	0.329587	0.365186	0.373681	0.46283	0.505315	0.645953	0.820994	115258	182017	294974	373556	44014	469057	42296	307233	180082	0.902936	0.40318	0.16347	0.0663222	0.0280188	0.00960337	106066	11.87	0.069	116258	-0.21	20967	2018	11	9	9	43	4	0.0793
2018-10-31 01:54:59	0	0	0	0	0	0	0.0016691	0.00667456	0.0312089	0.128391	0.23999	0.260222	0.267137	0.299954	0.30084	0.339376	0.354669	0.444696	0.486918	0.5939	0.72077	0.960381	145285	223911	26106	268282	248999	223044	202613	187357	173253	145761	101103	0.515958	0.184954	0.0422887	107424	11.75	0.069	116258	-0.2	20966	2018	11	9	9	43	5	0.0793
2018-10-31 01:54:59	0	0	0	0	0	0	0.00106653	0.00537498	0.0278989	0.126341	0.254018	0.277447	0.282423	0.312506	0.307241	0.340713	0.348705	0.426873	0.45774	0.570714	0.708151	0.9948	161613	270605	340089	362652	314842	218684	125051	0.64832	0.346817	0.202671	0.124594	0.0730899	0.0347631	0.0106233	107499	11.95	0.069	115806	-0.21	20966	2018	11	9	9	43	6	0.0793
2018-10-31 01:54:59	0	0	0	0	0	0	0.00180312	0.00796307	0.0386713	0.160597	0.287777	0.284747	0.271293	0.287855	0.283245	0.327693	0.356484	0.465924	0.52727	0.668297	0.842055	114255	172394	26733	329012	382815	419227	425477	379806	278209	157302	0.68808	0.232798	0.0657792	0.0168851	0.00424238	106292	11.85	0.069	116258	-0.22	20965	2018	11	9	9	43	7	0.0793
2018-10-31 01:54:59	0	0	0	0	0	0	0.00173928	0.00726498	0.0353354	0.147603	0.262443	0.265529	0.262612	0.298264	0.313593	0.370734	0.392834	0.481064	0.492321	0.57021	0.656488	0.858646	131972	21842	283088	32874	331183	285433	211632	142925	0.990485	0.789522	0.725063	0.659723	0.42386	0.14445	107273	11.76	0.069	116032	-0.22	20964	2018	11	9	9	43	8	0.0794
2018-10-31 01:54:59	0	0	0	0	0	0	0.00150249	0.00697638	0.034236	0.144169	0.261603	0.260748	0.245519	0.258523	0.257473	0.305997	0.344132	0.455272	0.514889	0.645809	0.806769	113092	183803	294991	330844	291401	198223	105983	0.485568	0.216273	0.107999	0.0652274	0.0453581	0.0319485	0.0174875	0.00561498	108254	11.94	0.069	115656	-0.22	20964	2018	11	9	9	43	9	0.0793
2018-10-31 01:54:59	0	0	0	0	0	0	0	0.00434069	0.0241047	0.116988	0.250024	0.283668	0.300825	0.34929	0.354388	0.39495	0.395542	0.467312	0.474952	0.564513	0.66748	0.899184	140838	23193	296825	341223	337731	27579	183127	0.990678	0.447801	0.1719	0.0586541	0.0187148	0.00561181	0.00141081	107725	11.85	0.069	115806	-0.21	20963	2018	11	9	9	43	10	0.0793
2018-10-31 01:54:59	0	0	0	0	0	0	0.00186919	0.00773904	0.0366937	0.151433	0.280064	0.295648	0.299929	0.334129	0.326614	0.343493	0.320831	0.360148	0.357937	0.443044	0.545329	0.812566	143923	26456	36418	426391	40427	305068	188425	101215	0.515017	0.255634	0.120894	0.0493733	0.0156369	0.00393415	106745	11.76	0.069	115581	-0.21	20963	2018	11	9	9	43	11	0.0794
2018-10-31 01:54:59	0	0	0	0	0	0	0.00131905	0.00604079	0.03059	0.135561	0.268361	0.294116	0.306703	0.353789	0.362117	0.408619	0.41304	0.488487	0.494007	0.58129	0.679897	0.918327	14465	239804	309748	366598	392227	36529	28774	186871	0.98773	0.425395	0.16499	0.0677403	0.0276997	0.00718328	107273	11.94	0.069	116032	-0.2	20962	2018	11	9	9	43	12	0.0793
2018-10-31 01:54:59	0	0	0	0	0	0	0.00137874	0.00636204	0.0314014	0.13411	0.251313	0.262907	0.262359	0.291655	0.295138	0.337416	0.35542	0.447667	0.495629	0.631177	0.80105	110401	170974	263429	299555	284052	214787	126701	0.592535	0.235873	0.0889524	0.0336806	0.013001	0.00505761	0.00188697	0	108178	11.84	0.069	115656	-0.22	20961	2018	11	9	9	43	13	0.0794
2018-10-31 01:54:59	0	0	0	0	0	0	0.00145918	0.00698597	0.0349036	0.149024	0.273712	0.275385	0.267599	0.292216	0.291159	0.32962	0.340729	0.422419	0.456675	0.578668	0.729318	103979	1717	289095	361898	384274	341494	259989	182074	131352	107845	103903	104485	0.897066	0.512548	0.16141	107499	11.76	0.069	116182	-0.22	20961	2018	11	9	9	43	14	0.0793
2018-10-31 01:54:59	0	0	0	0	0	0	0	0.0044233	0.0243226	0.116931	0.243038	0.274585	0.288069	0.325672	0.314394	0.333226	0.321667	0.382538	0.40352	0.515147	0.654624	0.942579	156058	251424	286981	269143	217319	170929	147356	149287	178207	241889	319287	329349	183654	0.344656	107273	11.93	0.069	116032	-0.22	20.96	2018	11	9	9	43	15	0.0794
2018-10-31 01:54:59	0	0	0	0	0	0	0.00199576	0.00809522	0.0375177	0.15138	0.27382	0.287993	0.290452	0.325898	0.331365	0.379398	0.400336	0.503915	0.552388	0.697078	0.875775	120253	18131	263953	290212	294861	283055	258878	227768	192524	157134	119808	0.778425	0.383947	0.127113	0.027657	105764	11.83	0.069	116032	-0.23	20.96	2018	11	9	9	43	16	0.0793
2018-10-31 01:54:59	0	0	0	0	0	0	0.00204545	0.0083174	0.0382877	0.152253	0.269015	0.275115	0.275625	0.310273	0.31321	0.347868	0.350674	0.426233	0.454786	0.564402	0.697482	0.977743	158932	258606	305983	300884	245973	17638	121273	0.864563	0.679689	0.575326	0.474959	0.319907	0.143343	0.0344754	107424	11.75	0.069	115806	-0.22	20959	2018	11	9	9	43	17	0.0793
2018-10-31 01:54:59	0	0	0	0	0	0	0.00179141	0.00762799	0.0370623	0.154939	0.279131	0.281301	0.271361	0.289699	0.279015	0.306095	0.310344	0.385059	0.422996	0.559309	0.736123	111473	193631	327213	393464	39422	327997	231131	141344	0.77026	0.37753	0.167543	0.0672336	0.0251908	0.00836072	0.002197	106896	11.95	0.069	115806	-0.2	20958	2018	11	9	9	43	18	0.0794
2018-10-31 01:54:59	0	0	0	0	0	0	0.00119857	0.00591817	0.0313097	0.142512	0.274851	0.291978	0.299699	0.349548	0.367039	0.42244	0.431394	0.516462	0.527093	0.635376	0.763326	102565	156547	235655	261738	253698	210958	148504	0.905236	0.50661	0.278098	0.149649	0.0746928	0.0311269	0.00994803	0.0023827	107047	11.83	0.069	115656	-0.23	20958	2018	11	9	9	43	19	0.0793
2018-10-31 01:54:59	0	0	0	0	0	0	0.00166371	0.00758482	0.0366263	0.150645	0.266814	0.261785	0.249597	0.26795	0.267599	0.311731	0.340649	0.443745	0.496794	0.623328	0.778857	106056	162494	25256	299505	311284	266743	179305	0.939141	0.398184	0.147989	0.0516829	0.017984	0.00649412	0.00235657	0	10765	11.75	0.069	115506	-0.22	20957	2018	11	9	9	43	20	0.0793
2018-10-31 01:54:59	0	0	0	0	0	0	0.00191259	0.00808703	0.038581	0.157553	0.276668	0.271706	0.258264	0.274684	0.267617	0.304685	0.330557	0.440822	0.514926	0.675326	0.881943	120563	176865	24423	25283	249288	24705	251434	257282	253801	229925	180692	115775	0.599315	0.234819	0.0612938	108027	11.94	0.069	115731	-0.19	20957	2018	11	9	9	43	21	0.0793
2018-10-31 01:54:59	0	0	0	0	0	0	0.00216446	0.00828898	0.0377805	0.148318	0.254466	0.255276	0.252166	0.283368	0.290453	0.331192	0.338538	0.408374	0.42146	0.516506	0.629597	0.911584	155824	269775	341271	362184	316671	231137	142985	0.773187	0.374482	0.168856	0.0700855	0.0254564	0.00753285	0.00177767	107122	11.8	0.069	115957	-0.22	20956	2018	11	9	9	43	22	0.0793
2018-10-31 01:54:59	0	0	0	0	0	0	0.00196193	0.00772192	0.0354514	0.14135	0.250888	0.260023	0.260296	0.290994	0.293622	0.330108	0.337764	0.414226	0.444666	0.555848	0.691333	0.984747	162538	274312	346291	375679	334573	232531	121554	0.492871	0.167896	0.0526167	0.0164351	0.00547121	0.00205023	0	107499	11.74	0.069	115882	-0.21	20955	2018	11	9	9	43	23	0.0794
2018-10-31 04:54:59	0	0	0	0	0	0	0.00192204	0.00486319	0.0166026	0.0506976	0.0771984	0.0765904	0.0687335	0.0621049	0.0498682	0.0453491	0.0408686	0.0464235	0.0507747	0.0668445	0.0875844	0.130024	0.21511	0.365826	0.516795	0.723389	0.941729	10278	0.866362	0.532242	0.25071	0.100755	0.0399168	0.0189622	0.0105263	0.00489782	107047	11.84	0.0619	111746	-0.19	20694	2018	11	9	9	54	49	0.0768
2018-10-31 04:54:59	0	0	0	0	0	0	0.00120294	0.00372117	0.0137058	0.0448749	0.0729008	0.0726348	0.0664588	0.062064	0.050528	0.0440345	0.0352022	0.033496	0.0291083	0.0319144	0.0346017	0.0512434	0.102374	0.261475	0.564447	109191	175146	204165	15043	0.70955	0.266815	0.0984476	0.0411364	0.0199401	0.0101665	0.00422945	107876	11.95	0.0687	112047	-0.16	20694	2018	11	9	9	54	50	0.0791
2018-10-31 04:54:59	0	0	0	0	0	0	0.00129293	0.00431	0.0159992	0.0513309	0.0768576	0.0701004	0.0592384	0.0523602	0.0431805	0.0432562	0.0442693	0.0581546	0.0731364	0.105233	0.151006	0.234092	0.402177	0.650308	0.745319	0.693258	0.534914	0.361156	0.237327	0.172899	0.155497	0.17164	0.198958	0.183416	0.0986329	0.0263204	107801	11.83	0.0688	112047	-0.18	20697	2018	11	9	9	54	51	0.0792
2018-10-31 04:54:59	0	0	0	0	0	0.00211746	0.00354983	0.00679658	0.0187357	0.0464916	0.0614105	0.0572639	0.049017	0.0426471	0.0344548	0.032732	0.0332271	0.0440991	0.0589212	0.0878121	0.131067	0.18826	0.262476	0.300203	0.245232	0.184462	0.139207	0.108562	0.0873701	0.071447	0.0654807	0.0688993	0.0831005	0.100013	0.0837865	0.0314636	108555	11.75	0.0689	111445	-0.19	20.7	2018	11	9	9	54	52	0.0792
2018-10-31 04:54:59	0	0	0	0	0	0	0.0013962	0.00399623	0.0147213	0.0481761	0.0770737	0.0755669	0.0672844	0.0607416	0.0479022	0.041948	0.0353677	0.038312	0.0404706	0.0553602	0.0753479	0.133328	0.298504	0.690947	107943	117057	0.875609	0.504329	0.247284	0.110613	0.0524357	0.0303119	0.0210762	0.014308	0.00747498	0.00275613	107499	11.96	0.0689	111671	-0.19	20703	2018	11	9	9	54	53	0.0793
2018-10-31 04:54:59	0	0	0	0	0	0.00112907	0.00220539	0.00510636	0.0167717	0.0489166	0.0722936	0.0713584	0.0669192	0.065626	0.0566198	0.0538354	0.0504298	0.0611755	0.0718722	0.0984801	0.134603	0.194656	0.297985	0.411415	0.416646	0.402891	0.418787	0.480639	0.557953	0.598042	0.577258	0.482165	0.348231	0.203717	0.100538	0.0323023	107197	11.84	0.0689	111896	-0.18	20704	2018	11	9	9	54	54	0.0793
2018-10-31 04:54:59	0	0	0	0	0	0.00110085	0.00221722	0.00536103	0.0165218	0.0459927	0.0703454	0.0710595	0.0648602	0.0567627	0.0417048	0.0342441	0.029215	0.0337361	0.0399475	0.0577764	0.0832277	0.137502	0.25483	0.445168	0.557487	0.589308	0.586317	0.611786	0.681791	0.756681	0.80757	0.76249	0.588655	0.369309	0.196288	0.0642309	107725	11.76	0.0689	111821	-0.19	20702	2018	11	9	9	54	55	0.0793
2018-10-31 04:54:59	0	0	0	0	0	0	0.00115514	0.00351549	0.0129419	0.0429695	0.0733563	0.0779205	0.0746696	0.0710075	0.0572586	0.0522912	0.0480284	0.0577525	0.0680533	0.094745	0.131078	0.21465	0.421631	0.887139	139473	168586	14244	0.824085	0.354692	0.129127	0.0461076	0.0176639	0.00764541	0.0038398	0.00201571	0	106669	11.96	0.0689	111821	-0.18	20.7	2018	11	9	9	54	56	0.0793
2018-10-31 04:54:59	0	0	0	0	0	0.00198781	0.00358168	0.00696946	0.0199578	0.0508777	0.0667665	0.0604624	0.0516803	0.045245	0.0354118	0.0316721	0.0284668	0.0333628	0.0386353	0.0518544	0.0691875	0.106355	0.191911	0.393775	0.681503	0.993271	103666	0.781799	0.501055	0.321776	0.246306	0.241621	0.289594	0.303688	0.197708	0.0894947	10682	11.84	0.069	11137	-0.19	20699	2018	11	9	9	54	57	0.0793
2018-10-31 04:54:59	0	0	0	0	0	0.00185584	0.00305936	0.0059907	0.0177014	0.0479247	0.0698477	0.071261	0.0656605	0.0606334	0.0491694	0.0439294	0.0389505	0.0440164	0.0491704	0.0666285	0.0900364	0.14552	0.275781	0.526607	0.722452	0.759912	0.577946	0.302974	0.11402	0.0364207	0.0127	0.00582561	0.00382688	0.00363982	0.0038232	0.00262403	108027	11.76	0.069	11137	-0.2	20698	2018	11	9	9	54	58	0.0793
2018-10-31 04:54:59	0	0	0	0	0	0.00127866	0.00269418	0.00625127	0.0194892	0.0531018	0.0702874	0.0620539	0.0518079	0.0456562	0.0376054	0.037783	0.0395747	0.0544964	0.0730353	0.11264	0.173469	0.282571	0.478559	0.685635	0.667209	0.54032	0.379453	0.248102	0.167539	0.127736	0.115849	0.118682	0.123884	0.108571	0.0600419	0.017243	107197	11.95	0.069	111445	-0.18	20698	2018	11	9	9	54	59	0.0793
2018-10-31 04:54:59	0	0	0	0	0	0	0.00107673	0.00363108	0.0147419	0.0520308	0.0852701	0.0824265	0.0728855	0.0666916	0.0535744	0.0498806	0.0467267	0.0581344	0.0704475	0.104139	0.153279	0.247871	0.433962	0.698048	0.839614	0.968676	108181	110768	0.973389	0.700845	0.398149	0.187937	0.082599	0.0380245	0.018106	0.00544461	10599	11.83	0.069	111144	-0.19	20698	2018	11	9	9	55	0	0.0793
2018-10-31 04:54:59	0	0	0	0	0	0.00188392	0.0036793	0.00801532	0.0226043	0.0558561	0.0723494	0.0633393	0.0542389	0.0485266	0.0385236	0.0331521	0.0273013	0.0295743	0.0325344	0.0479033	0.0700668	0.131857	0.300948	0.671558	104086	124629	118157	0.992723	0.840479	0.751233	0.721139	0.689545	0.65616	0.638647	0.568662	0.266436	106518	11.75	0.069	111295	-0.19	20698	2018	11	9	9	55	1	0.0793
2018-10-31 04:54:59	0	0	0	0	0	0.00304178	0.00480228	0.0083003	0.02211	0.0537758	0.0723206	0.0744254	0.0711667	0.0656364	0.0470066	0.0329392	0.0225569	0.0218538	0.0230101	0.0331305	0.0475935	0.081902	0.159709	0.295836	0.412249	0.532393	0.652513	0.735377	0.713764	0.561673	0.353879	0.169625	0.0682427	0.0244058	0.00844082	0.0024361	10682	11.95	0.069	111219	-0.18	20697	2018	11	9	9	55	2	0.0793
2018-10-31 04:54:59	0	0	0	0	0	0	0.0020517	0.00584533	0.0202751	0.0606203	0.0847804	0.0762454	0.0663477	0.0635215	0.0576844	0.0604715	0.0614044	0.0761571	0.0868979	0.114616	0.150701	0.216883	0.350605	0.572767	0.71512	0.759214	0.672086	0.503022	0.328895	0.193175	0.114509	0.075785	0.0600366	0.0514216	0.0380008	0.0154013	10682	11.82	0.069	111595	-0.19	20697	2018	11	9	9	55	3	0.0793
2018-10-31 04:54:59	0	0	0	0	0	0	0.00148959	0.00453943	0.0175782	0.0590729	0.0916784	0.0867899	0.0780015	0.0734869	0.0610907	0.0552699	0.0463307	0.0482994	0.0468378	0.0575965	0.0703136	0.111134	0.224385	0.520336	0.954862	148949	170743	125587	0.576629	0.18462	0.0501541	0.0138231	0.00440104	0.00158417	0	0	106217	11.75	0.069	111295	-0.18	20697	2018	11	9	9	55	4	0.0793
2018-10-31 04:54:59	0	0	0	0	0	0	0.00138919	0.00409715	0.0151511	0.0495408	0.0788041	0.0779287	0.0711801	0.0676324	0.0571788	0.0546415	0.0506603	0.0601309	0.0687003	0.0966103	0.135296	0.224241	0.431	0.80419	105152	108035	0.859877	0.549385	0.305624	0.166705	0.104164	0.0799464	0.0719026	0.0599274	0.0340185	0.0109248	106368	11.94	0.069	111595	-0.19	20696	2018	11	9	9	55	5	0.0793
2018-10-31 04:54:59	0	0	0	0	0	0.00133716	0.00289656	0.0070287	0.0225062	0.0619715	0.0809458	0.0688091	0.0566729	0.0496285	0.0410034	0.0416038	0.0447609	0.0629981	0.0847826	0.119523	0.168038	0.219385	0.283473	0.351436	0.374396	0.429856	0.514767	0.593872	0.627952	0.63039	0.639989	0.669506	0.696458	0.669459	0.44394	0.130271	107047	11.81	0.069	110919	-0.18	20696	2018	11	9	9	55	6	0.0793
2018-10-31 04:54:59	0	0	0	0	0	0	0.00194834	0.00538844	0.017821	0.0515692	0.0731619	0.0665342	0.0566307	0.0510263	0.0433636	0.0447684	0.0484361	0.066	0.0845578	0.114162	0.153643	0.206944	0.297257	0.427798	0.494401	0.543625	0.577405	0.570268	0.50123	0.389752	0.297773	0.235097	0.184994	0.134426	0.0765415	0.0262074	106971	11.75	0.069	111295	-0.2	20696	2018	11	9	9	55	7	0.0793
2018-10-31 04:54:59	0	0	0	0	0	0	0.00147925	0.00423391	0.0156429	0.0510168	0.0819105	0.0810411	0.0740062	0.0682007	0.0525626	0.0436861	0.0349977	0.0367804	0.0374758	0.0486645	0.0628695	0.106822	0.237524	0.575686	0.972852	11622	0.934471	0.534483	0.251185	0.114404	0.0579336	0.0349562	0.0243255	0.0177832	0.0103034	0.00344434	107197	11.93	0.069	111069	-0.2	20695	2018	11	9	9	55	8	0.0793
2018-10-31 04:54:59	0	0	0	0	0	0	0.00198876	0.00525503	0.0177282	0.0527987	0.0789101	0.0758198	0.0683869	0.062511	0.0488109	0.0418995	0.0358497	0.0417847	0.0496051	0.0729625	0.107215	0.177707	0.329538	0.556582	0.634355	0.566969	0.416701	0.272402	0.170932	0.108533	0.0760578	0.0593419	0.0507648	0.0420393	0.0279538	0.010829	107273	11.8	0.069	110994	-0.2	20695	2018	11	9	9	55	9	0.0793
2018-10-31 04:54:59	0	0	0	0	0	0.00112363	0.00236282	0.00592387	0.0203952	0.0612931	0.0847284	0.0751109	0.0607981	0.0509398	0.0381578	0.0328084	0.0287163	0.0340149	0.0404409	0.0617793	0.0942654	0.169779	0.352362	0.645316	0.741151	0.638557	0.446954	0.271646	0.149184	0.0789356	0.045697	0.0317901	0.0265046	0.0243257	0.0184126	0.00815058	10682	11.74	0.069	110994	-0.2	20695	2018	11	9	9	55	10	0.0793
2018-10-31 04:54:59	0	0	0	0	0	0	0	0.00291431	0.0121382	0.0444093	0.0782736	0.0779517	0.0692194	0.0604834	0.045372	0.0400903	0.0364189	0.0442119	0.0521776	0.0750612	0.107331	0.1811	0.351847	0.663284	0.904542	10913	120366	118345	102831	0.811916	0.604946	0.416013	0.239157	0.103641	0.0310257	0.00675945	106443	11.93	0.069	11137	-0.19	20694	2018	11	9	9	55	11	0.0793
2018-10-31 04:54:59	0	0	0	0	0	0	0.00191519	0.0056382	0.0189978	0.0559495	0.0859587	0.0787161	0.0666029	0.0547503	0.0391907	0.0326934	0.028873	0.0348283	0.0427426	0.0615865	0.088512	0.14476	0.275153	0.541861	0.791193	0.885407	0.695233	0.385258	0.165794	0.0622994	0.0254632	0.0126422	0.00815129	0.00592988	0.0038106	0.0016047	107197	11.79	0.069	11137	-0.19	20694	2018	11	9	9	55	12	0.0793
2018-10-31 04:54:59	0	0	0	0	0	0.00149679	0.00294573	0.00659728	0.0208035	0.0578183	0.0801792	0.0727974	0.0617203	0.0533508	0.0410903	0.0364175	0.032975	0.039525	0.0464967	0.0655792	0.0922148	0.150339	0.27913	0.49223	0.6168	0.655285	0.62133	0.555081	0.46974	0.374384	0.286445	0.21644	0.170292	0.127625	0.0823384	0.0295205	106896	11.75	0.069	110919	-0.2	20694	2018	11	9	9	55	13	0.0793
2018-10-31 04:54:59	0	0	0	0	0	0	0.00113244	0.00355623	0.0140374	0.0489937	0.0823684	0.0804236	0.0695253	0.0577245	0.0401716	0.0325304	0.0276709	0.032662	0.03896	0.0556628	0.0790224	0.123425	0.216058	0.389883	0.566336	0.794976	106898	13547	156514	151234	118288	0.730053	0.386777	0.187271	0.0782028	0.0217157	107876	11.92	0.069	110843	-0.2	20693	2018	11	9	9	55	14	0.0793
2018-10-31 04:54:59	0	0	0	0	0	0.00110463	0.002319	0.00559984	0.0180224	0.0514475	0.0738973	0.0711089	0.0658432	0.0634294	0.0541737	0.0520517	0.0488522	0.0576233	0.0636585	0.0802984	0.100762	0.15391	0.291649	0.599911	0.89991	102281	0.846917	0.530235	0.278461	0.136937	0.0724698	0.0439829	0.0313562	0.0244134	0.0170646	0.00703308	10682	11.78	0.069	111069	-0.19	20693	2018	11	9	9	55	15	0.0793
2018-10-31 04:54:59	0	0	0	0	0	0.00121322	0.00231696	0.0054454	0.0168516	0.0472352	0.0733961	0.0753845	0.0707685	0.0654154	0.0527912	0.0480181	0.0451193	0.0546443	0.0654572	0.088845	0.120229	0.167688	0.242342	0.356424	0.458967	0.598055	0.724412	0.738741	0.613289	0.409283	0.240828	0.131174	0.0708568	0.0376888	0.0163864	0.00475109	106745	11.75	0.069	111295	-0.21	20692	2018	11	9	9	55	16	0.0793
2018-10-31 04:54:59	0	0	0	0	0	0	0.00158257	0.00439114	0.0161794	0.0525922	0.0830416	0.0823688	0.0760333	0.0706319	0.0564652	0.0517308	0.0484035	0.0610514	0.0758103	0.106325	0.148435	0.209152	0.31053	0.488194	0.66767	0.904999	112817	122082	109319	0.770474	0.452499	0.243603	0.134141	0.0759691	0.0362162	0.0111706	106669	11.9	0.069	111219	-0.22	20692	2018	11	9	9	55	17	0.0793
2018-10-31 04:54:59	0	0	0	0	0	0	0.00193675	0.00493061	0.0164946	0.0494185	0.0753684	0.0753043	0.0678636	0.0598901	0.0449426	0.0376375	0.0321969	0.0376011	0.0451851	0.0688649	0.104731	0.181189	0.341186	0.581037	0.697546	0.718803	0.662863	0.542189	0.375739	0.220027	0.119898	0.0682581	0.0449986	0.0350479	0.0276747	0.0138534	106896	11.78	0.069	111144	-0.2	20692	2018	11	9	9	55	18	0.0793
2018-10-31 04:54:59	0	0	0	0	0	0	0	0.00378681	0.0157283	0.0567949	0.0948454	0.0920567	0.0819045	0.0740249	0.0578987	0.0520241	0.0463655	0.0546617	0.063124	0.0913501	0.131407	0.216244	0.405454	0.748462	103872	125511	130362	121167	109934	103899	107236	122214	136632	110546	0.483669	0.109556	10584	11.75	0.069	111219	-0.2	20691	2018	11	9	9	55	19	0.0793
2018-10-31 04:54:59	0	0	0	0	0	0	0.00159595	0.00478976	0.0172529	0.0542853	0.0827291	0.0806763	0.0748271	0.0732194	0.0634512	0.0608733	0.0560726	0.0647038	0.0699304	0.0874881	0.108776	0.155142	0.257706	0.477475	0.758182	115405	143598	123866	0.717584	0.316944	0.134957	0.0683567	0.0471104	0.0406312	0.0310554	0.0149553	106217	11.9	0.069	110919	-0.2	20.69	2018	11	9	9	55	20	0.0793
2018-10-31 04:54:59	0	0	0	0	0	0.00114612	0.00245682	0.00607577	0.0203499	0.0587459	0.0783495	0.0681174	0.0573533	0.0526454	0.045632	0.045693	0.0440097	0.0524839	0.0580491	0.0739379	0.0935146	0.135966	0.236868	0.480317	0.817585	124306	146368	119648	0.702	0.343891	0.176809	0.102034	0.0650712	0.0402325	0.0198973	0.00675162	106368	11.77	0.069	111144	-0.2	20.69	2018	11	9	9	55	21	0.0793
2018-10-31 04:54:59	0	0	0	0	0	0	0.00197161	0.00472041	0.0151733	0.0440047	0.0673043	0.0687308	0.0646439	0.06084	0.0489784	0.0428035	0.0366878	0.0403925	0.0434903	0.0564544	0.0729395	0.112501	0.206164	0.392207	0.555307	0.66372	0.683149	0.633979	0.559479	0.461806	0.382245	0.301959	0.244388	0.210684	0.156901	0.053508	10682	11.9	0.069	110843	-0.2	20.69	2018	11	9	9	55	22	0.0793
2018-10-31 04:54:59	0	0	0	0	0	0.00166617	0.00317215	0.00683909	0.0211731	0.0569713	0.0723024	0.0605899	0.0476738	0.0395302	0.0308969	0.0292421	0.0289169	0.0388645	0.0532131	0.0848797	0.135048	0.219211	0.372268	0.586846	0.694384	0.738882	0.705706	0.591157	0.440639	0.29717	0.193827	0.128759	0.0863021	0.0595033	0.0325927	0.00988256	106518	11.89	0.069	110693	-0.2	20.69	2018	11	9	9	55	23	0.0793
2018-10-31 04:54:59	0	0	0	0	0	0.00115164	0.00223025	0.00521554	0.0171374	0.050308	0.0750496	0.0734549	0.0666831	0.0614861	0.0499233	0.0444915	0.0389843	0.0429701	0.0451874	0.0558982	0.0688466	0.0960827	0.154158	0.272076	0.410355	0.587051	0.732768	0.748409	0.615282	0.417271	0.256482	0.154525	0.0956719	0.0589401	0.0319279	0.0121799	107348	11.76	0.069	110693	-0.2	20.69	2018	11	9	9	55	24	0.0793
2018-10-31 04:54:59	0	0	0	0	0	0.00105201	0.00230764	0.00596596	0.0201441	0.0593125	0.0833167	0.075276	0.0641491	0.0572729	0.046336	0.042338	0.0381168	0.0440998	0.0494556	0.0681747	0.0937031	0.144229	0.247491	0.431836	0.598332	0.746079	0.767946	0.621016	0.400553	0.225325	0.133455	0.0930715	0.0759281	0.060845	0.0348969	0.0112826	106896	11.93	0.069	110543	-0.2	20.69	2018	11	9	9	55	25	0.0793
2018-10-31 04:54:59	0	0	0	0	0	0.00178914	0.0034867	0.00752597	0.0232237	0.0621473	0.0809258	0.070224	0.0608124	0.0581366	0.0516594	0.0510806	0.0478574	0.0548431	0.0572705	0.0676195	0.0793352	0.110782	0.189392	0.380494	0.637881	0.949412	11247	0.970999	0.588009	0.260792	0.106233	0.0497562	0.0326329	0.0298016	0.0293157	0.0192959	106669	11.88	0.069	111144	-0.2	20.69	2018	11	9	9	55	26	0.0793
2018-10-31 04:54:59	0	0	0	0	0	0	0.00203142	0.00518928	0.0185076	0.0583057	0.0878162	0.0857554	0.0769802	0.0690015	0.0519831	0.0430191	0.0351218	0.0387988	0.0427533	0.0600979	0.0841039	0.143104	0.290877	0.59613	0.879286	106074	103867	0.85414	0.616925	0.415396	0.284435	0.209927	0.169562	0.134055	0.086768	0.037105	106368	11.77	0.069	110618	-0.2	20.69	2018	11	9	9	55	27	0.0793
2018-10-31 04:54:59	0	0	0	0	0	0	0.0011316	0.00397231	0.01486	0.048489	0.0783869	0.0741291	0.0643472	0.0554483	0.0410892	0.0346484	0.0290964	0.0324048	0.0359953	0.0515739	0.0733032	0.124779	0.246195	0.477479	0.699191	0.945196	122213	155031	187739	20281	187513	141703	0.926895	0.572594	0.305481	0.0786497	105764	11.94	0.069	110768	-0.21	20.69	2018	11	9	9	55	28	0.0793
2018-10-31 04:54:59	0	0	0	0	0	0.00169859	0.00332543	0.00761874	0.020771	0.051226	0.0740536	0.0774677	0.0798013	0.083833	0.0761545	0.0737603	0.0716526	0.0882259	0.106862	0.13778	0.176924	0.211518	0.244563	0.265391	0.257739	0.303905	0.458238	0.767389	120954	151897	147528	0.994388	0.49167	0.204261	0.079695	0.0254236	105387	11.88	0.069	110618	-0.2	20.69	2018	11	9	9	55	29	0.0793
2018-10-31 04:54:59	0	0	0	0	0	0.00195876	0.00341793	0.00678007	0.0205735	0.0546311	0.0700564	0.0648215	0.0590488	0.0577963	0.0506278	0.0482739	0.0444413	0.0528058	0.0603631	0.0821146	0.111401	0.170466	0.297099	0.510536	0.649015	0.689345	0.596693	0.423827	0.24911	0.124415	0.0562932	0.0255064	0.0128533	0.00771425	0.0050651	0.00200833	106971	11.76	0.069	110994	-0.2	20.69	2018	11	9	9	55	30	0.0793
2018-10-31 04:54:59	0	0	0	0	0	0.00244305	0.00393075	0.00712862	0.0206766	0.0533986	0.0707311	0.0671742	0.0605222	0.0564009	0.0454907	0.0393415	0.0337658	0.0386927	0.0443746	0.062019	0.0866349	0.136918	0.243024	0.410271	0.498554	0.485265	0.355539	0.19234	0.0814133	0.0314822	0.0137552	0.0080726	0.00682341	0.00746926	0.00770932	0.00415851	107273	11.93	0.069	111069	-0.21	20689	2018	11	9	9	55	31	0.0794
2018-10-31 04:54:59	0	0	0	0	0	0	0	0.0026213	0.0113005	0.0422929	0.0741874	0.0757097	0.0726424	0.0722626	0.062105	0.0587958	0.0527918	0.0585801	0.0588501	0.0681535	0.0782767	0.104051	0.167736	0.309713	0.473181	0.661392	0.823117	0.923349	0.971246	0.996601	107259	125003	151459	157042	10707	0.351585	105311	11.86	0.069	110392	-0.22	20689	2018	11	9	9	55	32	0.0793
2018-10-31 04:54:59	0	0	0	0	0	0	0.00157343	0.00473359	0.0174043	0.055919	0.0875571	0.083955	0.0767273	0.0738354	0.0652801	0.065484	0.0634481	0.0727285	0.0733486	0.0812663	0.0892476	0.114847	0.18384	0.340187	0.494797	0.589364	0.597123	0.582635	0.609798	0.723233	102817	171241	292385	424095	414804	142468	104783	11.76	0.069	110543	-0.21	20688	2018	11	9	9	55	33	0.0793
2018-10-31 04:54:59	0	0	0	0	0	0.0020816	0.0037273	0.00752773	0.0216918	0.0552049	0.0721683	0.06615	0.0579681	0.0526639	0.0427613	0.0381447	0.0338746	0.0393576	0.0453894	0.0660015	0.0960314	0.162394	0.307419	0.483966	0.465512	0.31741	0.171151	0.0849782	0.043969	0.025989	0.0190527	0.0182882	0.0213672	0.0260751	0.0235259	0.0103853	106066	11.94	0.069	110919	-0.21	20688	2018	11	9	9	55	34	0.0793
2018-10-31 04:54:59	0	0	0	0	0	0	0.0016406	0.00454468	0.0167832	0.0535835	0.0787104	0.0720368	0.0619467	0.0557161	0.0452987	0.0436391	0.0427994	0.0542861	0.0642651	0.0858622	0.113986	0.162262	0.256705	0.418784	0.558255	0.715793	0.856898	0.951756	102682	116172	130499	132777	112022	0.744067	0.359593	0.0900861	106292	11.85	0.069	110543	-0.2	20688	2018	11	9	9	55	35	0.0794
2018-10-31 04:54:59	0	0	0	0	0	0.00170549	0.00310931	0.00667086	0.0200006	0.053566	0.0731303	0.0708662	0.0650511	0.0632843	0.0564669	0.0556809	0.0531444	0.0618653	0.0676768	0.0865694	0.11037	0.158268	0.254558	0.407167	0.506599	0.578706	0.6148	0.595044	0.501951	0.344507	0.192912	0.0886409	0.0363668	0.0146021	0.00563829	0.00183187	106217	11.76	0.069	110618	-0.2	20688	2018	11	9	9	55	36	0.0793
2018-10-31 04:54:59	0	0	0	0	0	0	0.00160957	0.00414075	0.0143176	0.0451682	0.0754046	0.0827672	0.0830035	0.0819497	0.065551	0.0525836	0.0389415	0.0370254	0.0348311	0.044428	0.0564264	0.0983493	0.224234	0.538454	0.870176	0.972651	0.768458	0.473691	0.243876	0.109877	0.0475062	0.0205015	0.00914722	0.00404425	0.00190932	0	107273	11.95	0.069	110618	-0.2	20688	2018	11	9	9	55	37	0.0793
2018-10-31 04:54:59	0	0	0	0	0	0.00222669	0.00362198	0.00670516	0.0199528	0.0531396	0.0712471	0.0663728	0.05664	0.0482322	0.0358556	0.0304865	0.0270785	0.0331089	0.0413144	0.0634505	0.0973743	0.173881	0.351446	0.613127	0.660601	0.507193	0.296627	0.148395	0.0726046	0.0415684	0.0331911	0.0405699	0.0685922	0.122218	0.141126	0.0697354	106217	11.85	0.069	110843	-0.2	20688	2018	11	9	9	55	38	0.0793
2018-10-31 04:54:59	0	0	0	0	0	0	0.00207489	0.00521651	0.0182412	0.0564599	0.0840764	0.0828983	0.0761346	0.0720389	0.059409	0.0549314	0.0504571	0.0596345	0.06659	0.0859539	0.110409	0.160334	0.269035	0.487972	0.719412	0.950445	103209	0.881194	0.62989	0.419942	0.288752	0.202902	0.134929	0.0831605	0.0428968	0.0156856	106896	11.76	0.069	110618	-0.21	20688	2018	11	9	9	55	39	0.0794
2018-10-31 04:54:59	0	0	0	0	0	0.00246335	0.00383195	0.00695539	0.019015	0.0481383	0.0693246	0.07141	0.0653422	0.0562725	0.0391897	0.0277679	0.0194815	0.0186464	0.0191968	0.0272527	0.0386566	0.0726823	0.169115	0.376107	0.54668	0.557804	0.406305	0.227198	0.108801	0.0507416	0.0272554	0.0181686	0.0151504	0.0131074	0.0091308	0.00343269	10682	11.95	0.069	110618	-0.21	20688	2018	11	9	9	55	40	0.0794
2018-10-31 04:54:59	0	0	0	0	0	0.00151683	0.00294495	0.00674271	0.0197022	0.0514939	0.0712199	0.0657989	0.0562565	0.048703	0.0380603	0.0340923	0.031594	0.0388251	0.049025	0.0741635	0.112004	0.182434	0.318463	0.51474	0.614231	0.631965	0.55339	0.407555	0.257256	0.145635	0.0841362	0.0531589	0.0389726	0.0301993	0.0213046	0.009369	106594	11.84	0.069	110167	-0.22	20688	2018	11	9	9	55	41	0.0794
2018-10-31 04:54:59	0	0	0	0	0	0.0010725	0.00211907	0.00513439	0.0173586	0.0524022	0.0779768	0.0760235	0.0672002	0.0611926	0.0511474	0.0497417	0.0487029	0.0591319	0.0669974	0.0850784	0.107418	0.149105	0.231018	0.379622	0.525904	0.729744	0.995859	119967	110956	0.741446	0.379928	0.173928	0.0781143	0.0372461	0.0174305	0.00602447	106066	11.75	0.069	110768	-0.2	20688	2018	11	9	9	55	42	0.0794
2018-10-31 04:54:59	0	0	0	0	0	0.00190404	0.00350537	0.00730235	0.0203959	0.0513909	0.0697641	0.0671662	0.0602495	0.0545264	0.0438145	0.0394264	0.0361307	0.0433437	0.0525394	0.075398	0.108135	0.171785	0.301557	0.489985	0.548644	0.469325	0.317658	0.185972	0.102623	0.0568267	0.0354676	0.025243	0.0206248	0.0177891	0.0138855	0.00643514	106745	11.96	0.069	110693	-0.22	20688	2018	11	9	9	55	43	0.0793
2018-10-31 04:54:59	0	0	0	0	0	0.00219307	0.00375614	0.00702752	0.0196483	0.048628	0.0630947	0.0597837	0.0566178	0.057986	0.054466	0.054757	0.0513528	0.058009	0.0603246	0.0730349	0.0881075	0.125434	0.207179	0.357624	0.482363	0.576256	0.574698	0.442053	0.243583	0.0989208	0.0355843	0.013139	0.00587161	0.00303302	0.00155786	0	107197	11.83	0.069	110242	-0.22	20688	2018	11	9	9	55	44	0.0794
2018-10-31 04:54:59	0	0	0	0	0	0.00413092	0.00614398	0.00970535	0.0229966	0.0496651	0.0602562	0.0559126	0.0487339	0.0431353	0.0344371	0.0312972	0.0298671	0.0374415	0.0476012	0.0660435	0.0914268	0.13601	0.225504	0.384091	0.511213	0.560766	0.490794	0.350886	0.219603	0.132823	0.0876252	0.0687184	0.0616752	0.0597497	0.0498895	0.0242839	106518	11.75	0.069	110467	-0.21	20688	2018	11	9	9	55	45	0.0794
2018-10-31 04:54:59	0	0	0	0	0	0.00133499	0.00258459	0.00575561	0.0189187	0.0556486	0.081497	0.0797418	0.0713859	0.0646569	0.050144	0.0428333	0.036935	0.0426029	0.0488498	0.0688669	0.0970913	0.152003	0.258133	0.3948	0.428868	0.403333	0.333205	0.250577	0.175152	0.120319	0.0885174	0.0711207	0.0621079	0.0472045	0.0225549	0.0050979	107273	11.95	0.069	110768	-0.2	20689	2018	11	9	9	55	46	0.0793
2018-10-31 04:54:59	0	0	0	0	0	0.00128519	0.00262781	0.00621116	0.0194756	0.0545666	0.0787849	0.0746708	0.0643471	0.0549616	0.0411838	0.0353672	0.0314778	0.0375949	0.0454944	0.0660573	0.0958312	0.156829	0.285537	0.484116	0.578656	0.554444	0.424876	0.266465	0.145856	0.0764319	0.0434696	0.0288629	0.0218499	0.0170381	0.0112893	0.00446789	107197	11.83	0.069	110317	-0.22	20689	2018	11	9	9	55	47	0.0794
2018-10-31 04:54:59	0	0	0	0	0	0.00377038	0.00572753	0.00937396	0.0227472	0.0500409	0.0634054	0.0606461	0.0566149	0.0539877	0.045905	0.0413422	0.0366444	0.0399844	0.0418734	0.0495148	0.0583993	0.076258	0.110912	0.164937	0.201952	0.232964	0.266306	0.321636	0.399327	0.448288	0.422559	0.334189	0.237513	0.149626	0.074574	0.0238654	106594	11.76	0.069	110242	-0.21	20689	2018	11	9	9	55	48	0.0793
2018-10-31 04:54:59	0	0	0	0	0	0.00164785	0.00315207	0.00663986	0.0207304	0.0565257	0.0754012	0.0701561	0.0651044	0.0649836	0.0574038	0.0540794	0.0472522	0.0506295	0.0497961	0.0553913	0.0611082	0.0770164	0.118251	0.228676	0.410754	0.699947	101272	122394	126007	108848	0.776444	0.440647	0.2002	0.0757969	0.0249781	0.00609257	104859	11.83	0.0619	109791	-0.2	20693	2018	11	9	9	56	37	0.0768
2018-10-31 04:54:59	0	0	0	0	0	0	0.00130781	0.00487781	0.0197572	0.0700888	0.121897	0.123012	0.119103	0.121403	0.108322	0.104684	0.0934553	0.0997737	0.0963609	0.107476	0.118316	0.141685	0.194978	0.317446	0.476229	0.70139	0.950571	119155	147994	197704	340285	761784	161506	195794	78314	0.752002	103652	11.94	0.0687	10964	-0.2	20691	2018	11	9	9	56	38	0.0791
2018-10-31 04:54:59	0	0	0	0	0	0	0.00190827	0.00510626	0.0175388	0.0526401	0.0782946	0.0743064	0.0673308	0.0634118	0.0531867	0.0489149	0.042672	0.0466336	0.048065	0.0634232	0.0833804	0.144334	0.310238	0.637315	0.845756	0.835094	0.638746	0.372339	0.166238	0.0620632	0.0228745	0.00951244	0.00465578	0.0026366	0.00162731	0	10584	11.84	0.0689	109791	-0.2	20.69	2018	11	9	9	56	39	0.0792
2018-10-31 04:54:59	0	0	0	0	0	0.00107774	0.00222968	0.00537849	0.0179418	0.0522326	0.0740038	0.0708958	0.0687247	0.0738628	0.0714736	0.0719671	0.0641992	0.0697812	0.0705698	0.0905524	0.115471	0.171912	0.286363	0.435237	0.481853	0.505306	0.536445	0.610333	0.826041	130965	208587	240568	175096	0.894324	0.329622	0.0728583	10501	11.75	0.0689	10964	-0.2	20691	2018	11	9	9	56	40	0.0792
2018-10-31 04:54:59	0	0	0	0	0	0	0.00180808	0.00539045	0.0188979	0.0578488	0.0880485	0.0818294	0.0706778	0.0622652	0.0492094	0.0461883	0.0448701	0.0568334	0.0692437	0.0957021	0.131664	0.199437	0.337089	0.574293	0.762752	0.924155	102701	101368	0.846741	0.568978	0.317547	0.158054	0.0718444	0.0290306	0.00958596	0.00258144	106669	11.93	0.0689	109715	-0.2	20.69	2018	11	9	9	56	41	0.0793
2018-10-31 04:54:59	0	0	0	0	0	0.00151218	0.00288365	0.00634364	0.0202597	0.0564218	0.0755643	0.0690629	0.0612847	0.0573928	0.0474402	0.0425816	0.0371513	0.0421844	0.0469043	0.0629169	0.0839575	0.116312	0.171659	0.251043	0.310415	0.404107	0.557442	0.798367	114291	144915	148307	112267	0.645782	0.278147	0.0869961	0.0204461	106594	11.84	0.0689	110016	-0.2	20.69	2018	11	9	9	56	42	0.0793
2018-10-31 04:54:59	0	0	0	0	0	0	0.0019656	0.00523975	0.0180753	0.0550814	0.0822582	0.0769177	0.0652352	0.0550445	0.0395107	0.030803	0.0234695	0.0237805	0.0245317	0.0338341	0.046373	0.0803874	0.171863	0.407307	0.77405	126428	153827	124928	0.674121	0.26264	0.0852458	0.0264168	0.00916172	0.00351873	0.00134799	0	105161	11.76	0.0689	109339	-0.21	20691	2018	11	9	9	56	43	0.0793
2018-10-31 04:54:59	0	0	0	0	0	0.00283519	0.00518364	0.0100503	0.0277312	0.0658628	0.0781056	0.064556	0.0539699	0.0490364	0.0422475	0.0419712	0.0422673	0.0545238	0.0668565	0.0909841	0.123781	0.178026	0.276514	0.393943	0.403349	0.343447	0.250863	0.17489	0.130618	0.111715	0.111284	0.124239	0.139768	0.130007	0.0793865	0.0247037	105764	11.96	0.069	10964	-0.21	20691	2018	11	9	9	56	44	0.0793
2018-10-31 04:54:59	0	0	0	0	0	0.00191918	0.0034192	0.00709397	0.0215024	0.0573386	0.0760405	0.0697041	0.0622434	0.0598257	0.0533338	0.0517637	0.0476009	0.0533354	0.0557954	0.0687254	0.0843353	0.118178	0.190242	0.325417	0.456281	0.592517	0.665005	0.612121	0.458861	0.296083	0.187408	0.123353	0.0890791	0.0644231	0.0406249	0.014483	105613	11.83	0.069	109339	-0.2	20691	2018	11	9	9	56	45	0.0793
2018-10-31 04:54:59	0	0	0	0	0	0.00132348	0.00280796	0.00661632	0.02022	0.053907	0.072003	0.0644508	0.0552249	0.0490496	0.0392826	0.0373718	0.0373494	0.0505022	0.0677874	0.10227	0.154031	0.253594	0.467148	0.77648	0.834243	0.629199	0.332065	0.13707	0.0537583	0.0239692	0.0139999	0.0103161	0.00877929	0.0069654	0.00440838	0.00156587	105764	11.77	0.069	10964	-0.2	20.69	2018	11	9	9	56	46	0.0793
2018-10-31 04:54:59	0	0	0	0	0	0.00146808	0.00286684	0.00673495	0.0232603	0.0695868	0.0955853	0.0842438	0.067801	0.0545064	0.0378018	0.029501	0.023455	0.0262562	0.0305131	0.0484225	0.0767025	0.146758	0.324693	0.659574	0.885755	0.922145	0.766464	0.524913	0.295031	0.135214	0.0573327	0.0263937	0.0148123	0.00950174	0.00518744	0.00192004	105764	11.96	0.069	109941	-0.21	20691	2018	11	9	9	56	47	0.0793
2018-10-31 04:54:59	0	0	0	0	0	0	0.00166515	0.00545199	0.0212798	0.0705023	0.104162	0.0934083	0.0836025	0.0844066	0.0790873	0.0821131	0.0777055	0.0880934	0.0887028	0.104676	0.122409	0.16478	0.265905	0.455972	0.607821	0.719875	0.779469	0.850924	105087	15702	270086	452708	557271	345404	0.879826	0.106553	104255	11.83	0.069	10949	-0.2	20691	2018	11	9	9	56	48	0.0793
2018-10-31 04:54:59	0	0	0	0	0	0.00272062	0.00441217	0.00823659	0.0237586	0.0607358	0.0796563	0.0731518	0.0637974	0.0563448	0.0434143	0.0361255	0.0297506	0.0319376	0.0336136	0.0425902	0.0537636	0.0850046	0.169591	0.37302	0.608969	0.776266	0.734986	0.518983	0.282917	0.126895	0.0546921	0.025454	0.0144178	0.00976879	0.00640132	0.00268679	105689	11.76	0.069	109866	-0.2	20692	2018	11	9	9	56	49	0.0793
2018-10-31 04:54:59	0	0	0	0	0	0.00312504	0.00516693	0.00926165	0.0250994	0.0592062	0.0696376	0.0592441	0.0498207	0.0447178	0.0374345	0.0350292	0.0323281	0.038116	0.0435449	0.0596276	0.0816003	0.12844	0.230622	0.3865	0.441375	0.391658	0.28564	0.186174	0.113569	0.0696682	0.0487538	0.0421257	0.0440997	0.0479751	0.0413735	0.0171101	106368	11.96	0.069	109415	-0.2	20693	2018	11	9	9	56	50	0.0793
2018-10-31 04:54:59	0	0	0	0	0	0	0.00113204	0.00355905	0.0134781	0.0445942	0.0717321	0.0683546	0.0601001	0.0528656	0.0395014	0.032491	0.0261596	0.0274722	0.0281686	0.0354557	0.0442541	0.066832	0.127354	0.304867	0.646914	116789	147464	123385	0.787216	0.484283	0.373148	0.41024	0.506902	0.399255	0.124143	0.0242654	10584	11.83	0.069	109565	-0.22	20693	2018	11	9	9	56	51	0.0793
2018-10-31 04:54:59	0	0	0	0	0	0.0018753	0.00334266	0.00711701	0.0209569	0.0558297	0.0810563	0.0794041	0.0706351	0.0605279	0.0441146	0.0357185	0.0299682	0.0336612	0.0386677	0.0517953	0.0690841	0.106419	0.194363	0.401481	0.679579	0.968468	103708	0.785606	0.431668	0.188303	0.0788157	0.0339718	0.0162312	0.00837909	0.00450033	0.00188413	105236	11.76	0.069	109866	-0.21	20693	2018	11	9	9	56	52	0.0793
2018-10-31 04:54:59	0	0	0	0	0	0.00312601	0.00480803	0.00802217	0.0219278	0.0542164	0.0704923	0.0687284	0.0632259	0.0595155	0.0479468	0.0407754	0.0336177	0.0369895	0.0414526	0.0596167	0.0855394	0.148051	0.294198	0.553409	0.733489	0.764886	0.609858	0.390183	0.22127	0.121028	0.0679293	0.0389699	0.0234593	0.0137685	0.00667866	0.00205812	105387	11.95	0.069	109415	-0.2	20694	2018	11	9	9	56	53	0.0793
2018-10-31 04:54:59	0	0	0	0	0	0	0.00163902	0.00478219	0.0176743	0.0576289	0.092234	0.0904882	0.0818426	0.0732796	0.0550257	0.0457133	0.0376817	0.0416049	0.0451857	0.0612714	0.0825008	0.13897	0.288141	0.646296	109809	160746	189115	164127	0.992911	0.416213	0.132205	0.0342745	0.00901377	0.00306761	0.00152423	0	104934	11.82	0.069	109791	-0.21	20694	2018	11	9	9	56	54	0.0793
2018-10-31 04:54:59	0	0	0	0	0	0.00422726	0.00686815	0.0109852	0.0292402	0.0659944	0.0698632	0.0566287	0.0497202	0.050229	0.0444863	0.0408019	0.0341196	0.0374855	0.0388345	0.0519907	0.0693105	0.121668	0.271189	0.624854	0.965822	10109	0.669912	0.299204	0.0980165	0.026552	0.00710109	0.00227712	0	0	0	0	10599	11.75	0.069	109791	-0.22	20694	2018	11	9	9	56	55	0.0794
2018-10-31 04:54:59	0	0	0	0	0	0.00157679	0.00315032	0.00745088	0.0250543	0.0734904	0.103857	0.0974122	0.0883206	0.0859482	0.0758397	0.0728115	0.0657415	0.0738294	0.0775672	0.102018	0.133767	0.209162	0.373232	0.637972	0.79548	0.862403	0.801165	0.624405	0.426719	0.284761	0.217043	0.206495	0.240461	0.29394	0.265102	0.127613	105689	11.94	0.069	109715	-0.21	20694	2018	11	9	9	56	56	0.0793
2018-10-31 04:54:59	0	0	0	0	0	0.00226405	0.0034865	0.00603684	0.0181959	0.051384	0.0776548	0.0915796	0.0912344	0.0900717	0.0752086	0.0658862	0.0556377	0.0601571	0.063309	0.0777603	0.0950591	0.140202	0.249775	0.50628	0.826272	108385	102204	0.690595	0.364971	0.162256	0.0681741	0.0284102	0.0121859	0.0053162	0.00240573	0	104406	11.82	0.069	109339	-0.2	20694	2018	11	9	9	56	57	0.0793
2018-10-31 04:54:59	0	0	0	0	0	0.00142858	0.00277162	0.00628727	0.0206302	0.059986	0.0836443	0.0775688	0.065754	0.0564058	0.0420073	0.0358513	0.0314938	0.0381157	0.0469347	0.0724101	0.111478	0.200711	0.412803	0.763985	0.928427	0.855675	0.604809	0.348433	0.181015	0.0949548	0.0550058	0.0360387	0.0257646	0.0177557	0.00994681	0.00342038	104557	11.75	0.069	109715	-0.2	20694	2018	11	9	9	56	58	0.0793
2018-10-31 04:54:59	0	0	0	0	0	0.00158255	0.00321892	0.00746273	0.0234988	0.0637964	0.0852036	0.0772261	0.0713719	0.0722779	0.0648299	0.0602399	0.0506636	0.0532191	0.052626	0.0680033	0.0875068	0.143866	0.290537	0.55347	0.686791	0.631277	0.481674	0.372407	0.347296	0.425041	0.647258	101784	130015	107608	0.489558	0.0996908	104783	11.93	0.069	109264	-0.21	20694	2018	11	9	9	56	59	0.0793
2018-10-31 04:54:59	0	0	0	0	0	0.00244108	0.00434054	0.00859829	0.0250427	0.0639181	0.0811635	0.0718555	0.0611988	0.0544966	0.0435854	0.0389019	0.0343204	0.0398802	0.0460159	0.0682193	0.100873	0.181208	0.374447	0.685766	0.821843	0.772068	0.613433	0.452633	0.337942	0.259348	0.199813	0.152188	0.114465	0.08379	0.0516255	0.0182182	105764	11.81	0.069	109339	-0.2	20694	2018	11	9	9	57	0	0.0793
2018-10-31 04:54:59	0	0	0	0	0	0.00248865	0.00416636	0.00796655	0.0230683	0.0601129	0.0823384	0.0829126	0.0817157	0.0846705	0.0757514	0.0703648	0.0617001	0.0699738	0.0784951	0.108872	0.150522	0.237949	0.418824	0.696199	0.850688	0.894738	0.828864	0.67321	0.493661	0.350895	0.272506	0.255685	0.256899	0.229497	0.132487	0.0397793	104331	11.75	0.069	109189	-0.21	20695	2018	11	9	9	57	1	0.0793
2018-10-31 04:54:59	0	0	0	0	0	0	0.00133513	0.00409972	0.0156628	0.0529113	0.087103	0.085775	0.0770144	0.0698745	0.0544928	0.046714	0.0386129	0.0413559	0.0431127	0.0586522	0.079261	0.134269	0.272315	0.5688	0.891325	12445	151254	148729	116328	0.765387	0.475232	0.274167	0.14634	0.0664639	0.0235431	0.00595422	104859	11.94	0.069	109415	-0.21	20694	2018	11	9	9	57	2	0.0793
2018-10-31 04:54:59	0	0	0	0	0	0.00377324	0.00549623	0.00885997	0.0234511	0.0558004	0.0703922	0.0650738	0.0563773	0.0492512	0.0372836	0.0299444	0.0237238	0.0246807	0.0259193	0.0354855	0.0485211	0.083067	0.168426	0.321956	0.42285	0.442559	0.390713	0.31004	0.231484	0.174317	0.143301	0.13551	0.141355	0.142496	0.10302	0.0394074	106594	11.81	0.069	109715	-0.21	20694	2018	11	9	9	57	3	0.0793
2018-10-31 04:54:59	0	0	0	0	0	0.00188594	0.00340207	0.00712199	0.0220449	0.0607536	0.0845895	0.0801986	0.0706284	0.0617079	0.045333	0.0361874	0.0291298	0.0321732	0.0364891	0.0513909	0.0721228	0.119291	0.232602	0.475086	0.745315	0.969015	0.964382	0.708856	0.407376	0.212478	0.120491	0.0822988	0.0662116	0.0524834	0.0323323	0.0114753	105538	11.75	0.069	109715	-0.21	20694	2018	11	9	9	57	4	0.0793
2018-10-31 04:54:59	0	0	0	0	0	0.00294219	0.00511653	0.00963117	0.027161	0.0672572	0.0828424	0.0738082	0.0636055	0.0581949	0.0482155	0.0446235	0.0418297	0.0518637	0.064145	0.0895885	0.124755	0.163502	0.209794	0.234469	0.208269	0.193777	0.214839	0.309585	0.560793	110525	184624	214427	155127	0.691933	0.200957	0.0406806	105311	11.93	0.069	109415	-0.22	20695	2018	11	9	9	57	5	0.0793
2018-10-31 04:54:59	0	0	0	0	0	0.00143693	0.00301322	0.00736185	0.0244075	0.0695889	0.0912013	0.0795201	0.0668317	0.0611641	0.0509426	0.046452	0.0404404	0.0461609	0.0521804	0.0749348	0.107318	0.177561	0.343738	0.650244	0.868261	0.926656	0.773207	0.511639	0.292895	0.168214	0.107153	0.0719738	0.0488046	0.0299646	0.0134947	0.0033821	10418	11.8	0.069	109339	-0.21	20695	2018	11	9	9	57	6	0.0793
2018-10-31 04:54:59	0	0	0	0	0	0.00153065	0.00290291	0.00647104	0.0206115	0.0574989	0.0792492	0.0728391	0.0628449	0.054425	0.0403801	0.0323596	0.0255192	0.0272125	0.0296592	0.0417965	0.058584	0.0939698	0.171627	0.321136	0.476378	0.662307	0.890096	118408	14204	127535	0.779651	0.334544	0.128292	0.0541459	0.0256741	0.00887583	105311	11.75	0.069	10964	-0.21	20695	2018	11	9	9	57	7	0.0793
2018-10-31 04:54:59	0	0	0	0	0	0.00110148	0.00226628	0.00555455	0.0193712	0.0595973	0.0894005	0.0857657	0.0779253	0.0718487	0.0553387	0.0456458	0.035915	0.0381073	0.0402202	0.0584692	0.0845427	0.168557	0.430949	107023	164294	165559	110449	0.554204	0.246347	0.108219	0.050396	0.0244253	0.0118452	0.0057031	0.00267459	0.00105484	104633	11.93	0.069	109264	-0.22	20695	2018	11	9	9	57	8	0.0793
2018-10-31 04:54:59	0	0	0	0	0	0.00143008	0.00279725	0.00649793	0.0202263	0.0558127	0.0800749	0.0784118	0.0753235	0.0754033	0.0631678	0.0505824	0.0348689	0.0291134	0.0230977	0.0247098	0.0261646	0.040419	0.0912966	0.27843	0.698572	132635	170619	151859	0.986029	0.536074	0.276824	0.144759	0.0797598	0.0490784	0.0324537	0.0135874	104783	11.79	0.069	109189	-0.21	20694	2018	11	9	9	57	9	0.0793
2018-10-31 04:54:59	0	0	0	0	0	0.00289374	0.00483832	0.0088687	0.0244028	0.059582	0.0755064	0.0676234	0.0576206	0.0502355	0.0390387	0.0338362	0.0292605	0.0329365	0.0364415	0.0496248	0.0673522	0.117515	0.2567	0.564714	0.81953	0.842512	0.61141	0.323133	0.131518	0.0469787	0.0181562	0.0086454	0.0056789	0.00477395	0.00384823	0.00194446	105764	11.75	0.069	109114	-0.22	20694	2018	11	9	9	57	10	0.0793
2018-10-31 04:54:59	0	0	0	0	0	0	0.001919	0.00505286	0.0184516	0.0596852	0.0947918	0.0992899	0.100915	0.106905	0.0909341	0.075181	0.0543499	0.0514124	0.0483423	0.0680334	0.0952777	0.17802	0.396228	0.827672	120523	148327	150872	122578	0.806301	0.460562	0.265757	0.163567	0.109024	0.0716925	0.0396903	0.0140233	103878	11.91	0.069	109189	-0.22	20694	2018	11	9	9	57	11	0.0793
2018-10-31 04:54:59	0	0	0	0	0	0.00226141	0.00362525	0.00664562	0.0204792	0.0567688	0.0791375	0.0796135	0.076244	0.0745322	0.0596365	0.0474677	0.0351071	0.0351147	0.0359961	0.0522561	0.075739	0.138399	0.293106	0.551014	0.682609	0.681806	0.580864	0.439156	0.306193	0.207041	0.144074	0.103598	0.074659	0.0513729	0.0288448	0.00802691	10501	11.79	0.069	10949	-0.22	20694	2018	11	9	9	57	12	0.0794
2018-10-31 04:54:59	0	0	0	0	0	0.0034803	0.00530977	0.00883069	0.0226133	0.0525919	0.066918	0.0635077	0.0562855	0.0508943	0.0405082	0.0350391	0.031064	0.0366674	0.0446216	0.0652052	0.0954782	0.148413	0.241627	0.323017	0.282756	0.193583	0.111196	0.0598942	0.035067	0.0256098	0.0267761	0.0386169	0.0683317	0.113309	0.12337	0.04428	106066	11.75	0.069	109114	-0.21	20694	2018	11	9	9	57	13	0.0793
2018-10-31 04:54:59	0	0	0	0	0	0.00133815	0.00283934	0.00698652	0.0233983	0.0670924	0.0884385	0.0740139	0.058307	0.0469452	0.0329023	0.0264523	0.0220528	0.0259446	0.0313175	0.0482572	0.0740627	0.131414	0.267223	0.524724	0.746876	0.951597	109765	108323	0.833741	0.489322	0.246902	0.12297	0.0667155	0.0369612	0.016976	0.00485359	105387	11.91	0.069	109189	-0.21	20694	2018	11	9	9	57	14	0.0793
2018-10-31 04:54:59	0	0	0	0	0	0.00185688	0.00331081	0.00702328	0.0202405	0.0525405	0.0737132	0.0721573	0.0663448	0.0623983	0.0521727	0.0464228	0.0402235	0.0442523	0.0486528	0.0674105	0.0934826	0.149368	0.266046	0.406294	0.399325	0.285488	0.159457	0.0806615	0.0430652	0.0267482	0.0203428	0.0186678	0.019426	0.0195983	0.013576	0.00446933	106141	11.78	0.069	109039	-0.22	20694	2018	11	9	9	57	15	0.0793
2018-10-31 04:54:59	0	0	0	0	0	0.00107308	0.00234047	0.00587791	0.0194526	0.0569917	0.0842225	0.0816707	0.0768369	0.0758724	0.0646951	0.0577655	0.0473079	0.0481134	0.046305	0.0563182	0.0679831	0.101602	0.183102	0.380267	0.682694	114949	159529	16411	117149	0.598942	0.254539	0.10419	0.0447309	0.0191126	0.00751588	0.00205045	104934	11.75	0.069	109339	-0.22	20694	2018	11	9	9	57	16	0.0793
2018-10-31 04:54:59	0	0	0	0	0	0.00120726	0.00234476	0.00540589	0.0191057	0.0598047	0.0898491	0.088496	0.0824421	0.0804905	0.0703695	0.0702229	0.0697215	0.0884901	0.104668	0.135445	0.174365	0.229903	0.322232	0.456848	0.539595	0.646579	0.79527	100951	128795	147117	137424	0.966095	0.51647	0.228512	0.0907647	0.0318534	105085	11.9	0.069	109114	-0.22	20693	2018	11	9	9	57	17	0.0793
2018-10-31 04:54:59	0	0	0	0	0	0	0.00174167	0.00516109	0.0187706	0.0600176	0.0933098	0.0875936	0.0737473	0.0595726	0.037663	0.0246457	0.0156533	0.0143419	0.0143045	0.0220436	0.0337789	0.0722251	0.197119	0.537355	0.99346	14399	165765	146352	0.924866	0.426489	0.175675	0.0825429	0.049006	0.0320839	0.0166997	0.00537393	104557	11.78	0.069	10949	-0.22	20693	2018	11	9	9	57	18	0.0793
2018-10-31 04:54:59	0	0	0	0	0	0.003184	0.00487636	0.00848225	0.0229938	0.056358	0.0739084	0.0706491	0.0625125	0.0555489	0.0431821	0.0375131	0.0337952	0.040607	0.0495621	0.0741818	0.111066	0.184426	0.325068	0.495222	0.5178	0.445699	0.319447	0.181736	0.0798925	0.0286014	0.00958716	0.00334041	0.00126937	0	0	0	104934	11.75	0.069	109415	-0.23	20694	2018	11	9	9	57	19	0.0793
2018-10-31 04:54:59	0	0	0	0	0	0.00225042	0.00399549	0.00821496	0.0232679	0.0579487	0.0756547	0.0678139	0.0588531	0.0523242	0.0402663	0.0322925	0.0246825	0.0244243	0.0243226	0.0317971	0.0412913	0.0661744	0.127592	0.275351	0.5055	0.862622	125337	143568	120351	0.689193	0.289825	0.101995	0.0350787	0.0141921	0.00769213	0.00372561	105085	11.9	0.069	109039	-0.22	20694	2018	11	9	9	57	20	0.0793
2018-10-31 04:54:59	0	0	0	0	0	0.00207329	0.00358645	0.0071906	0.022616	0.0628794	0.0848855	0.0774544	0.0673538	0.0610993	0.0491738	0.0440996	0.0388148	0.0452817	0.0520444	0.0765269	0.112086	0.200019	0.413175	0.775362	0.952425	0.957701	0.878385	0.778965	0.651834	0.479255	0.306904	0.164139	0.0770091	0.0333754	0.0129857	0.00385304	105085	11.76	0.069	109039	-0.22	20695	2018	11	9	9	57	21	0.0794
2018-10-31 04:54:59	0	0	0	0	0	0.00298906	0.0049641	0.00952399	0.0289893	0.0775674	0.100734	0.091316	0.0799325	0.0748474	0.0638452	0.0612538	0.0584625	0.0724024	0.08623	0.118467	0.161998	0.237572	0.38259	0.575395	0.618033	0.568062	0.493473	0.468541	0.572024	0.917742	177287	311978	356898	202738	0.454899	0.0570807	104557	11.93	0.069	108963	-0.22	20695	2018	11	9	9	57	22	0.0793
2018-10-31 04:54:59	0	0	0	0	0	0	0.00178185	0.0050368	0.0186464	0.0597073	0.0893307	0.0817232	0.0712053	0.0649016	0.0520983	0.0458378	0.038378	0.0413754	0.0427823	0.0564816	0.0740879	0.115482	0.210788	0.39499	0.572269	0.758902	0.932482	107206	117191	124507	130679	13089	107859	0.54633	0.133471	0.0237841	104783	11.9	0.069	109039	-0.22	20695	2018	11	9	9	57	23	0.0793
2018-10-31 04:54:59	0	0	0	0	0	0.00190713	0.00348094	0.00742913	0.0229573	0.0629892	0.0875019	0.0815887	0.0720009	0.0660533	0.0551438	0.0513851	0.0468868	0.0528443	0.0560187	0.0663439	0.0779371	0.0997203	0.144645	0.246852	0.396844	0.697711	124627	194267	213989	141671	0.577847	0.162406	0.040585	0.0119268	0.00509357	0.00216526	104331	11.76	0.069	108813	-0.22	20695	2018	11	9	9	57	24	0.0793
2018-10-31 04:54:59	0	0	0	0	0	0.00128904	0.002461	0.00567228	0.0192799	0.0582678	0.0870895	0.0862097	0.080195	0.0762317	0.0612153	0.0512812	0.04031	0.0419366	0.043376	0.0611715	0.0859046	0.160077	0.369078	0.816919	11723	123668	0.972607	0.60001	0.310834	0.144761	0.0686395	0.0340083	0.0178245	0.0089019	0.00342236	0	104557	11.93	0.069	109039	-0.21	20695	2018	11	9	9	57	25	0.0793
2018-10-31 04:54:59	0	0	0	0	0	0	0.00207368	0.00573535	0.0203474	0.0621734	0.0894567	0.0812639	0.0726115	0.0713307	0.0661114	0.070493	0.0716301	0.0890184	0.101012	0.133017	0.174208	0.253508	0.411242	0.66482	0.832381	0.965514	105612	110638	10786	0.940909	0.729833	0.489491	0.285756	0.128025	0.0416404	0.00897426	104783	11.88	0.069	109114	-0.2	20694	2018	11	9	9	57	26	0.0793
2018-10-31 04:54:59	0	0	0	0	0	0.00134145	0.00274012	0.00662356	0.0209431	0.0594631	0.0890314	0.0872009	0.0784707	0.0714616	0.0592321	0.0585988	0.0609606	0.0816401	0.104911	0.150331	0.214936	0.336539	0.564509	0.828341	0.827724	0.698928	0.540417	0.41065	0.321406	0.261194	0.224763	0.193763	0.167154	0.13133	0.0859783	0.0373958	10418	11.75	0.069	109339	-0.22	20694	2018	11	9	9	57	27	0.0793
2018-10-31 04:54:59	0	0	0	0	0	0.00152071	0.00277155	0.00603707	0.0198228	0.058819	0.0893803	0.0901923	0.0829963	0.0770478	0.0625217	0.0559676	0.0497074	0.0579652	0.0666659	0.0959561	0.137881	0.233447	0.44143	0.753102	0.86733	0.784622	0.558761	0.326064	0.167111	0.0827899	0.0445661	0.026874	0.0176443	0.0108211	0.00508038	0.00142458	104331	11.94	0.069	108813	-0.22	20693	2018	11	9	9	57	28	0.0794
2018-10-31 04:54:59	0	0	0	0	0	0.00204273	0.00366287	0.00771822	0.0228703	0.0598347	0.0811388	0.0739483	0.0630294	0.0538278	0.0404273	0.0337129	0.0290415	0.0336252	0.0394589	0.056576	0.0810527	0.130031	0.232945	0.382379	0.43741	0.422291	0.381347	0.352989	0.336013	0.306839	0.259987	0.194015	0.130225	0.0788646	0.0405702	0.0134491	104633	11.88	0.069	108963	-0.22	20693	2018	11	9	9	57	29	0.0794
2018-10-31 04:54:59	0	0	0	0	0	0.00304242	0.00499642	0.00917145	0.0255601	0.0622768	0.0753621	0.0665827	0.0582456	0.0549039	0.0471247	0.0433	0.0380028	0.0420076	0.0443657	0.057264	0.0738411	0.117125	0.229057	0.43501	0.526745	0.42709	0.240432	0.111078	0.0514668	0.0289778	0.0232622	0.0254118	0.0333165	0.0381229	0.0257136	0.00749695	105538	11.77	0.069	108888	-0.22	20692	2018	11	9	9	57	30	0.0794
2018-10-31 04:54:59	0	0	0	0	0	0.00255363	0.00459579	0.00893551	0.0250268	0.0613337	0.0752395	0.0658348	0.0569366	0.0533928	0.0473782	0.0481512	0.0489262	0.0619979	0.0739797	0.094123	0.119394	0.151087	0.200856	0.278441	0.338431	0.431694	0.566694	0.686713	0.665939	0.465825	0.250606	0.116344	0.0505678	0.022372	0.00974526	0.00335165	105311	11.94	0.069	108963	-0.22	20693	2018	11	9	9	57	31	0.0793
2018-10-31 04:54:59	0	0	0	0	0	0.00129301	0.00280624	0.00684625	0.0222642	0.0631592	0.085684	0.0760723	0.0646877	0.0584095	0.0476603	0.0438505	0.0394624	0.0459201	0.0517461	0.0708057	0.0965986	0.155707	0.295728	0.551973	0.723463	0.758523	0.637288	0.444842	0.281264	0.185569	0.149801	0.1579	0.189691	0.190858	0.103683	0.0297701	104783	11.88	0.069	108888	-0.23	20692	2018	11	9	9	57	32	0.0793
2018-10-31 04:54:59	0	0	0	0	0	0.00255715	0.00440292	0.00836663	0.0238969	0.0593448	0.0726037	0.0629988	0.0543782	0.0514508	0.045438	0.0447041	0.0424794	0.0503567	0.0562142	0.0724511	0.0930898	0.13566	0.22814	0.400141	0.544195	0.636639	0.607922	0.463689	0.284543	0.145607	0.0704169	0.034718	0.019584	0.0125767	0.00898909	0.0041636	105236	11.76	0.069	109114	-0.22	20692	2018	11	9	9	57	33	0.0793
2018-10-31 04:54:59	0	0	0	0	0	0.00293354	0.00460873	0.00789251	0.0224796	0.0573971	0.0749055	0.0713062	0.0653879	0.0625051	0.0516283	0.0448922	0.0373078	0.040767	0.0444568	0.0602023	0.081321	0.131024	0.249023	0.477883	0.662239	0.726516	0.614303	0.407877	0.22201	0.109439	0.0579365	0.0368175	0.0287571	0.0235918	0.0155095	0.00618914	104633	11.94	0.069	108963	-0.23	20692	2018	11	9	9	57	34	0.0794
2018-10-31 04:54:59	0	0	0	0	0	0.00190368	0.00359398	0.00756335	0.0223457	0.0582598	0.0792235	0.0762536	0.0726785	0.0741012	0.065926	0.0606663	0.0514409	0.0538892	0.053683	0.0640902	0.0761492	0.106264	0.177082	0.352066	0.624952	0.972686	105213	0.687615	0.278692	0.0827128	0.0232347	0.00748391	0.00305032	0.00150216	0	0	105085	11.88	0.069	108888	-0.22	20692	2018	11	9	9	57	35	0.0794
2018-10-31 04:54:59	0	0	0	0	0	0.00205434	0.00367674	0.00760685	0.023094	0.0616508	0.0814989	0.0730477	0.0625466	0.0562737	0.0465888	0.0442409	0.0425011	0.052115	0.0604822	0.0794418	0.104063	0.157065	0.279	0.516887	0.706938	0.746889	0.56233	0.301103	0.122621	0.0437416	0.0165392	0.00756294	0.00448279	0.00312298	0.00212822	0	105161	11.77	0.069	108963	-0.22	20692	2018	11	9	9	57	36	0.0793
2018-10-31 07:54:59	0	0	0	0	0.00100197	0.0058809	0.00733534	0.0095378	0.0238566	0.0522239	0.0559698	0.0460232	0.0367144	0.0303153	0.0223435	0.0186718	0.0162657	0.0202118	0.0261854	0.0431892	0.0712214	0.140517	0.317779	0.584627	0.599763	0.39281	0.181297	0.0731863	0.032321	0.0187377	0.0165327	0.0225814	0.0414655	0.075928	0.0865289	0.0353059	101917	11.82	0.0647	105429	-0.17	20644	2018	11	9	10	6	24	0.0779
2018-10-31 07:54:59	0	0	0	0	0.00115922	0.00615735	0.00766977	0.00990866	0.0236353	0.0502273	0.0563869	0.0492436	0.0427365	0.0386193	0.0310639	0.02675	0.022704	0.025786	0.02987	0.0430197	0.061863	0.103271	0.194851	0.340489	0.413611	0.41136	0.370947	0.339589	0.310663	0.264482	0.201651	0.138778	0.0868565	0.0480127	0.0230609	0.00586901	102369	11.93	0.0689	10573	-0.2	20641	2018	11	9	10	6	25	0.0793
2018-10-31 07:54:59	0	0	0	0	0.00125606	0.00606599	0.00746172	0.0100626	0.0240768	0.0513582	0.0572111	0.0488988	0.0403668	0.0356787	0.0313819	0.033293	0.0375338	0.0518457	0.0660722	0.0835433	0.1056	0.137379	0.196881	0.273462	0.271635	0.204297	0.116992	0.0581523	0.0317484	0.0237012	0.0294345	0.0583396	0.142388	0.251424	0.171924	0.0429921	101992	11.83	0.069	105279	-0.18	20.64	2018	11	9	10	6	26	0.0793
2018-10-31 07:54:59	0	0	0	0	0.00106259	0.00553811	0.00715036	0.00975289	0.0228306	0.0473925	0.0526176	0.0463121	0.0404089	0.0379598	0.033551	0.0332476	0.0340276	0.0446757	0.05702	0.0787573	0.108939	0.147346	0.200249	0.232282	0.192232	0.13852	0.0939248	0.0644263	0.0470842	0.0376787	0.0373057	0.0474993	0.0742274	0.119636	0.132108	0.0540823	10154	11.75	0.069	105279	-0.2	20639	2018	11	9	10	6	27	0.0793
2018-10-31 07:54:59	0	0	0	0	0	0.00515653	0.00692457	0.00955991	0.0230101	0.0488502	0.0542972	0.0460623	0.0392757	0.0361032	0.0314065	0.0309843	0.0312539	0.0398704	0.0483813	0.0619839	0.0791778	0.0968682	0.117993	0.138051	0.139222	0.160444	0.225421	0.370973	0.587633	0.731169	0.688183	0.512019	0.350197	0.196189	0.0771505	0.0202036	10252	11.92	0.069	105128	-0.18	20639	2018	11	9	10	6	28	0.0793
2018-10-31 07:54:59	0	0	0	0	0	0.00502047	0.00720294	0.0106178	0.0258461	0.0538874	0.0537665	0.0398251	0.0303601	0.0271431	0.026274	0.0324109	0.041904	0.0655492	0.0924946	0.126032	0.171678	0.220814	0.289313	0.344269	0.299462	0.21887	0.136629	0.0790204	0.0478228	0.0357359	0.0373121	0.054483	0.0867212	0.108068	0.0638681	0.0126653	10154	11.83	0.069	105203	-0.19	20638	2018	11	9	10	6	29	0.0793
2018-10-31 07:54:59	0	0	0	0	0.00114042	0.0059462	0.00711744	0.00921431	0.0226944	0.0499842	0.0573987	0.0525636	0.0473786	0.0442179	0.0361535	0.0314899	0.0276806	0.0324557	0.0380261	0.0502413	0.0663446	0.0925651	0.1429	0.230767	0.301017	0.341551	0.313288	0.234792	0.151062	0.0912772	0.0616262	0.0503865	0.0489244	0.0441451	0.0251869	0.00674649	101238	11.75	0.069	104978	-0.18	20637	2018	11	9	10	6	30	0.0793
2018-10-31 07:54:59	0	0	0	0	0.00165941	0.0070424	0.00825246	0.0101839	0.0219309	0.0429205	0.0475326	0.0430051	0.0379416	0.0347023	0.0288099	0.0258599	0.0239345	0.0291454	0.0363714	0.0517173	0.0736794	0.108328	0.166277	0.221698	0.204675	0.151978	0.0949778	0.0547946	0.0323623	0.0222052	0.0213409	0.029312	0.0535747	0.0952261	0.102878	0.03419	102294	11.94	0.069	105504	-0.2	20637	2018	11	9	10	6	31	0.0793
2018-10-31 07:54:59	0	0	0	0	0.00169351	0.0071889	0.00843697	0.0104875	0.022815	0.0451633	0.0508812	0.0451774	0.0388953	0.0341663	0.0269732	0.0225712	0.0195834	0.0229307	0.0285112	0.0423035	0.0630688	0.0895276	0.119757	0.107628	0.0556899	0.020862	0.00677814	0.00243217	0.00120587	0	0.00165023	0.00522401	0.0248075	0.100995	0.162737	0.042683	102822	11.83	0.069	105053	-0.19	20636	2018	11	9	10	6	32	0.0793
2018-10-31 07:54:59	0	0	0	0	0.00130474	0.00663235	0.0078636	0.00959106	0.0220215	0.0449605	0.0483483	0.0429326	0.0392762	0.0397322	0.0382989	0.0392339	0.0382801	0.0457589	0.0520321	0.0685371	0.0903587	0.121003	0.160557	0.182994	0.1615	0.14289	0.131052	0.118399	0.0984923	0.0772898	0.065	0.0663206	0.0778026	0.0906741	0.0772334	0.0293467	103199	11.75	0.069	105429	-0.18	20635	2018	11	9	10	6	33	0.0793
2018-10-31 07:54:59	0	0	0	0	0	0.00447679	0.00621796	0.00942794	0.0237398	0.0531299	0.0622508	0.0553355	0.0475938	0.0418597	0.0323617	0.0270816	0.0229808	0.0259027	0.0293358	0.039844	0.0539696	0.0847441	0.153603	0.28439	0.402619	0.508099	0.560819	0.523696	0.398161	0.250758	0.149077	0.0854061	0.0481781	0.0251573	0.0104164	0.0029053	101162	11.94	0.069	105128	-0.2	20634	2018	11	9	10	6	34	0.0793
2018-10-31 07:54:59	0	0	0	0	0.00153702	0.0079576	0.00883339	0.00983446	0.0224938	0.0461143	0.0486447	0.043449	0.038659	0.0369144	0.0317379	0.028738	0.0255479	0.0298477	0.0344609	0.0476955	0.0661594	0.10139	0.167067	0.223623	0.184164	0.112033	0.055891	0.0270538	0.0150472	0.0110648	0.0124611	0.0210358	0.0445539	0.081355	0.0719604	0.0163906	101841	11.83	0.069	105354	-0.18	20633	2018	11	9	10	6	35	0.0793
2018-10-31 07:54:59	0	0	0	0	0.00196956	0.00857241	0.0095994	0.0108189	0.0225044	0.041383	0.0398939	0.0322271	0.0257911	0.0221517	0.0185172	0.018094	0.0188925	0.0258356	0.0353361	0.0518392	0.0762795	0.107883	0.152665	0.170494	0.120424	0.0638657	0.0283963	0.0127436	0.00676829	0.00492029	0.00590198	0.0119492	0.0367347	0.117526	0.212381	0.0883821	103124	11.75	0.069	105053	-0.2	20632	2018	11	9	10	6	36	0.0793
2018-10-31 07:54:59	0	0	0	0	0	0.0041437	0.00561555	0.0086181	0.0228042	0.0536348	0.0638362	0.0554737	0.0448255	0.0366031	0.0264927	0.0208175	0.0164079	0.0174663	0.0192032	0.02788	0.0403628	0.0749752	0.170882	0.389078	0.610082	0.728254	0.638688	0.400975	0.182466	0.0666541	0.0250783	0.0123743	0.00911333	0.00929459	0.00874262	0.00448971	101162	11.93	0.069	105279	-0.2	20632	2018	11	9	10	6	37	0.0793
2018-10-31 07:54:59	0	0	0	0	0.00153077	0.00728056	0.00853335	0.0099868	0.0218118	0.0434427	0.0488144	0.0456646	0.0418198	0.039434	0.0320656	0.0268835	0.022335	0.0254321	0.0305932	0.0476987	0.0745509	0.133791	0.253682	0.348738	0.265052	0.13624	0.0542822	0.0199218	0.00827245	0.0048111	0.00493595	0.00954759	0.0299268	0.104714	0.21145	0.100889	101917	11.83	0.069	104752	-0.2	20631	2018	11	9	10	6	38	0.0793
2018-10-31 07:54:59	0	0	0	0	0.00104868	0.00631033	0.00761985	0.00923882	0.0225006	0.0485395	0.0534996	0.0483556	0.0457867	0.0485986	0.0489904	0.0529838	0.0527828	0.0620048	0.0647492	0.0741533	0.084442	0.106645	0.149692	0.228843	0.307088	0.434676	0.623943	0.799782	0.780807	0.541432	0.299467	0.149446	0.0727403	0.0349829	0.0156083	0.00496734	10169	11.75	0.069	104752	-0.2	20631	2018	11	9	10	6	39	0.0793
2018-10-31 07:54:59	0	0	0	0	0.00134059	0.00690567	0.00788755	0.00962359	0.0228785	0.0481605	0.0525378	0.0445803	0.0371319	0.0324223	0.0262093	0.0237361	0.0225908	0.0296107	0.0399655	0.0626096	0.0983263	0.157206	0.255542	0.318615	0.240612	0.138394	0.0691078	0.0342897	0.0190298	0.0132685	0.013593	0.021115	0.0439415	0.0879643	0.0936171	0.0287646	102143	11.94	0.069	104527	-0.2	20.63	2018	11	9	10	6	40	0.0793
2018-10-31 07:54:59	0	0	0	0	0.00132344	0.00651438	0.00814464	0.0107012	0.0245303	0.049851	0.0536605	0.0443012	0.0354348	0.0293103	0.022827	0.0209311	0.0211734	0.0299853	0.0449278	0.0753389	0.126778	0.195495	0.279786	0.282098	0.175079	0.0872569	0.0408888	0.0210943	0.0137019	0.0125784	0.0178135	0.0377489	0.0948564	0.198095	0.202798	0.0626868	101464	11.83	0.069	104451	-0.2	20.63	2018	11	9	10	6	41	0.0793
2018-10-31 07:54:59	0	0	0	0	0.00135689	0.00713346	0.00898155	0.0113033	0.0258385	0.0527277	0.0571548	0.0484576	0.0400227	0.0343071	0.0269016	0.0241013	0.0229079	0.0296536	0.0392616	0.0583558	0.0868503	0.132232	0.2063	0.273925	0.253649	0.203381	0.151402	0.116015	0.0968983	0.0907824	0.100675	0.128049	0.183003	0.251185	0.250685	0.102685	100861	11.75	0.069	104677	-0.21	20.63	2018	11	9	10	6	42	0.0793
2018-10-31 07:54:59	0	0	0	0	0.00169418	0.00754695	0.00853965	0.0102824	0.0227085	0.0448157	0.0485646	0.0427385	0.0379084	0.0362916	0.0330591	0.0324633	0.0310368	0.0365375	0.0413919	0.0532151	0.068361	0.0982215	0.158299	0.247426	0.282622	0.265128	0.211848	0.156206	0.112581	0.081385	0.0666768	0.065168	0.0738413	0.0758245	0.0490803	0.0140865	101011	11.94	0.069	105053	-0.2	20.63	2018	11	9	10	6	43	0.0793
2018-10-31 07:54:59	0	0	0	0	0.00138089	0.00715633	0.0086994	0.0111229	0.0255479	0.0514172	0.0542078	0.0449218	0.0383473	0.035337	0.0286961	0.0229353	0.0168617	0.0162012	0.01573	0.0216601	0.0297868	0.0580343	0.149173	0.363437	0.521884	0.462661	0.268056	0.121638	0.0516729	0.0241885	0.0147194	0.0123879	0.0131093	0.0140823	0.00965981	0.00267835	100559	11.83	0.069	104451	-0.2	20629	2018	11	9	10	6	44	0.0793
2018-10-31 07:54:59	0	0	0	0	0.00124512	0.00619405	0.00758314	0.00965106	0.0223644	0.0461136	0.0485239	0.0411305	0.03351	0.028877	0.0236817	0.0230882	0.0242639	0.0334585	0.0455268	0.0647513	0.092088	0.128592	0.186002	0.258714	0.282716	0.271794	0.215935	0.146802	0.0970013	0.0713363	0.066939	0.0811675	0.116649	0.151842	0.120221	0.0390266	101615	11.75	0.069	104752	-0.2	20629	2018	11	9	10	6	45	0.0793
2018-10-31 07:54:59	0	0	0	0	0	0.00160967	0.00303675	0.00659037	0.0199534	0.0521401	0.0653844	0.0560368	0.0468505	0.0415641	0.033252	0.0292783	0.0252003	0.0283122	0.0313462	0.0409217	0.052963	0.0732211	0.114851	0.202317	0.317467	0.502084	0.760235	108328	148815	191679	214629	175183	0.925158	0.331785	0.0889832	0.0207398	100936	11.94	0.069	104451	-0.2	20628	2018	11	9	10	6	46	0.0793
2018-10-31 07:54:59	0	0	0	0	0.00115628	0.00578177	0.00693108	0.00903249	0.022048	0.0491013	0.060556	0.0618086	0.0643798	0.0727494	0.0695546	0.0597105	0.0430121	0.0373925	0.0316205	0.0361911	0.0411704	0.057151	0.0923295	0.162817	0.253684	0.402581	0.631878	0.911609	104993	0.891337	0.604898	0.3885	0.29574	0.297498	0.327534	0.1395	102294	11.83	0.069	104677	-0.2	20627	2018	11	9	10	6	47	0.0793
2018-10-31 07:54:59	0	0	0	0	0.00148777	0.00717824	0.00805215	0.00937868	0.0215324	0.0445446	0.049983	0.0463486	0.04262	0.0409871	0.0346748	0.0306909	0.0271013	0.0325868	0.0408365	0.0622758	0.0952683	0.149296	0.232471	0.268603	0.188723	0.099484	0.0430165	0.0174202	0.00753274	0.00417567	0.00381296	0.00637258	0.0172644	0.049498	0.0799586	0.0302626	101464	11.75	0.069	104602	-0.21	20628	2018	11	9	10	6	48	0.0793
2018-10-31 07:54:59	0	0	0	0	0	0.00509098	0.00687471	0.0100074	0.0242125	0.0516261	0.0576046	0.0498655	0.0427112	0.0388519	0.0314244	0.025854	0.0203082	0.0211249	0.0226215	0.0326143	0.0470544	0.0845992	0.182434	0.351837	0.411159	0.313928	0.162824	0.0668922	0.0258272	0.0115278	0.00782801	0.00874547	0.0153048	0.0282819	0.0356248	0.014719	101313	11.94	0.069	104903	-0.2	20629	2018	11	9	10	6	49	0.0793
2018-10-31 07:54:59	0	0	0	0	0.0016405	0.00760047	0.00904856	0.0113377	0.0252327	0.0501426	0.0526544	0.0442451	0.0356591	0.029414	0.0220063	0.0180606	0.0155636	0.0182441	0.0221719	0.0327211	0.0484328	0.0815669	0.154816	0.237922	0.20875	0.120984	0.0538534	0.0229395	0.0113022	0.00742907	0.00771619	0.0128539	0.0310448	0.0792371	0.115224	0.0384931	101992	11.82	0.069	104451	-0.2	20.63	2018	11	9	10	6	50	0.0793
2018-10-31 07:54:59	0	0	0	0	0.00219517	0.00844286	0.0086983	0.00971345	0.0206689	0.0405703	0.0477208	0.0465784	0.0465263	0.0494041	0.0460308	0.0416761	0.035421	0.0375356	0.0394039	0.0489227	0.0608283	0.082235	0.119692	0.157456	0.147822	0.110946	0.0685042	0.0385205	0.0228365	0.0162986	0.016967	0.0251052	0.047839	0.0827374	0.0820214	0.0210397	101389	11.75	0.069	104301	-0.21	20.63	2018	11	9	10	6	51	0.0793
2018-10-31 07:54:59	0	0	0	0	0	0.0036769	0.00550782	0.00900351	0.0239683	0.0557972	0.0659838	0.0579218	0.051413	0.0499119	0.0454815	0.045248	0.0434129	0.0513669	0.0571476	0.0709975	0.087928	0.113468	0.157557	0.241984	0.345092	0.511979	0.655979	0.60198	0.370144	0.166276	0.0728919	0.0403427	0.0341577	0.0421888	0.0497666	0.0214822	100936	11.94	0.069	104827	-0.2	20629	2018	11	9	10	6	52	0.0793
2018-10-31 07:54:59	0	0	0	0	0.00149881	0.00701886	0.00869171	0.0108653	0.0236354	0.0463683	0.0506942	0.0434543	0.0360314	0.0304396	0.0230731	0.0186542	0.0148942	0.0156907	0.0171154	0.0242814	0.0344422	0.063962	0.147028	0.318609	0.428638	0.359082	0.183808	0.068904	0.0247249	0.0109064	0.00742395	0.00811772	0.0132527	0.0230889	0.0269446	0.0109334	101238	11.8	0.069	104376	-0.2	20628	2018	11	9	10	6	53	0.0793
2018-10-31 07:54:59	0	0	0	0	0.00158871	0.00707956	0.00811399	0.00993525	0.0221355	0.044041	0.0475704	0.0395216	0.0313292	0.0248682	0.0185951	0.0168337	0.0172645	0.0248519	0.0376842	0.060152	0.0961107	0.149256	0.23599	0.329782	0.323207	0.259784	0.176944	0.108267	0.0636122	0.0394965	0.0311548	0.0334201	0.0473827	0.0678411	0.0649817	0.021103	101011	11.75	0.069	104226	-0.21	20627	2018	11	9	10	6	54	0.0793
2018-10-31 07:54:59	0	0	0	0	0.00187414	0.00853094	0.0092842	0.0103262	0.0226639	0.0450082	0.0494326	0.0431918	0.0362502	0.0306272	0.0226029	0.0181672	0.0155684	0.0190234	0.0251916	0.0398174	0.0631455	0.102581	0.168972	0.222824	0.19254	0.136678	0.0867947	0.0536947	0.0347645	0.0261407	0.0264513	0.0359315	0.0584533	0.0782581	0.0512194	0.00986817	101087	11.94	0.069	104451	-0.2	20626	2018	11	9	10	6	55	0.0793
2018-10-31 07:54:59	0	0	0	0	0.00129758	0.00683776	0.00824648	0.010354	0.0242956	0.0504777	0.0542988	0.0470556	0.0419139	0.0406674	0.0356101	0.0323532	0.0279286	0.0307269	0.0329375	0.0426316	0.0549966	0.0814274	0.138039	0.247441	0.363526	0.493886	0.576942	0.543501	0.395873	0.228947	0.121216	0.0672655	0.0427578	0.0297376	0.0196484	0.00804586	0.998045	11.8	0.069	104451	-0.2	20625	2018	11	9	10	6	56	0.0793
2018-10-31 07:54:59	0	0	0	0	0.00142644	0.00708779	0.00783436	0.00895464	0.0207742	0.0437058	0.049053	0.0475408	0.0470572	0.0525154	0.0553167	0.0599721	0.0604182	0.0701702	0.0724268	0.0755135	0.0785993	0.0803879	0.0864836	0.0985915	0.100933	0.106437	0.108375	0.100741	0.087672	0.0758738	0.0773009	0.0956735	0.140297	0.187739	0.138158	0.0345551	101011	11.75	0.069	104376	-0.2	20624	2018	11	9	10	6	57	0.0793
2018-10-31 07:54:59	0	0	0	0	0.00151773	0.00746839	0.00849857	0.00977722	0.0215129	0.0421662	0.0453726	0.0398834	0.0361908	0.0362161	0.0339893	0.0342126	0.0337114	0.042136	0.0512706	0.0685315	0.0915421	0.122335	0.165571	0.204025	0.197438	0.193734	0.204192	0.227067	0.241246	0.225455	0.195774	0.164596	0.145893	0.136295	0.117521	0.0465251	101162	11.93	0.069	104677	-0.2	20623	2018	11	9	10	6	58	0.0793
2018-10-31 07:54:59	0	0	0	0	0.00159725	0.00724371	0.00809859	0.00975779	0.0220933	0.0447874	0.048984	0.0425901	0.0359184	0.0309284	0.0238342	0.0198679	0.0171528	0.0203124	0.0251996	0.0390058	0.0604939	0.102202	0.180791	0.24248	0.192823	0.116062	0.065197	0.0431464	0.0397757	0.0532073	0.105642	0.255318	0.521964	0.5883	0.275869	0.0483379	101389	11.81	0.069	104677	-0.22	20623	2018	11	9	10	6	59	0.0793
2018-10-31 07:54:59	0	0	0	0	0.00174916	0.00752058	0.00864637	0.0108179	0.0240856	0.0482938	0.0538272	0.0457797	0.0364757	0.0293568	0.0214463	0.0175886	0.0157526	0.0199495	0.027536	0.0447801	0.0730552	0.12253	0.213232	0.292985	0.243578	0.146068	0.0712193	0.0329	0.0164664	0.0100314	0.0091981	0.0136258	0.0310706	0.0798558	0.122411	0.0543402	101313	11.75	0.069	104075	-0.2	20623	2018	11	9	10	7	0	0.0793
2018-10-31 07:54:59	0	0	0	0	0.00174725	0.00789918	0.00890263	0.0100816	0.0214858	0.0414423	0.0457712	0.0418453	0.0385746	0.0369048	0.0307012	0.0261627	0.0218823	0.0250211	0.0304664	0.0464106	0.0708599	0.118182	0.207378	0.291821	0.255706	0.165977	0.0884672	0.0450167	0.0254944	0.0178596	0.0173698	0.0221259	0.032484	0.0422158	0.0313683	0.00733896	101389	11.93	0.069	104376	-0.21	20623	2018	11	9	10	7	1	0.0793
2018-10-31 07:54:59	0	0	0	0	0	0.00505732	0.00697694	0.010086	0.0250157	0.0545799	0.061436	0.0553835	0.0506824	0.049569	0.0437653	0.0404555	0.0352658	0.038597	0.0403112	0.0522143	0.0675781	0.107412	0.201869	0.352899	0.409658	0.350257	0.231714	0.135794	0.0816041	0.0572437	0.0514865	0.059579	0.0743398	0.0696684	0.0347542	0.00938893	100861	11.8	0.069	104602	-0.21	20622	2018	11	9	10	7	2	0.0793
2018-10-31 07:54:59	0	0	0	0	0	0.00465812	0.0060829	0.00866728	0.0216081	0.0492904	0.0622745	0.0596464	0.0540928	0.0495087	0.039089	0.0316392	0.024886	0.0259992	0.0282642	0.0408907	0.0592826	0.104289	0.206985	0.334221	0.315253	0.194916	0.0858455	0.032126	0.0128835	0.00676282	0.00566195	0.00777266	0.0153912	0.0321688	0.0415797	0.0159872	101464	11.75	0.069	1.04	-0.22	20621	2018	11	9	10	7	3	0.0793
2018-10-31 07:54:59	0	0	0	0	0.00183583	0.00767276	0.00827265	0.0099511	0.0224504	0.0454961	0.0504468	0.0443585	0.0376467	0.0329356	0.0264463	0.0228052	0.0202715	0.0241577	0.030077	0.0458537	0.0701561	0.111543	0.179159	0.213824	0.15347	0.0833068	0.0400813	0.0202565	0.0122362	0.0100469	0.0129916	0.025586	0.0613261	0.116614	0.103204	0.0232131	101615	11.93	0.069	104527	-0.21	20621	2018	11	9	10	7	4	0.0793
2018-10-31 07:54:59	0	0	0	0	0.00103882	0.00527327	0.00688255	0.00953594	0.0227069	0.0487216	0.0578331	0.0529835	0.0480458	0.0459848	0.0405857	0.0395652	0.03924	0.0497622	0.0617629	0.0845568	0.115986	0.158987	0.219201	0.245356	0.182358	0.107576	0.0547133	0.0272306	0.0152532	0.0110424	0.0124472	0.0225571	0.0571835	0.135501	0.167472	0.0529138	101011	11.8	0.069	104151	-0.21	20.62	2018	11	9	10	7	5	0.0794
2018-10-31 07:54:59	0	0	0	0	0.00196327	0.00861446	0.00905757	0.0100432	0.0220455	0.0434916	0.0469141	0.0418736	0.0371963	0.0341824	0.0280558	0.0238824	0.0201179	0.0226748	0.0264493	0.0392809	0.0585216	0.0988463	0.179767	0.240858	0.175253	0.0833778	0.0307476	0.0109918	0.00477354	0.00308102	0.00367022	0.00820155	0.0281136	0.0970734	0.160414	0.0539243	101389	11.75	0.069	104226	-0.21	20.62	2018	11	9	10	7	6	0.0793
2018-10-31 07:54:59	0	0	0	0	0.00141284	0.00717548	0.00900192	0.0114723	0.0259462	0.0517913	0.0533156	0.043352	0.0341885	0.0279019	0.0211216	0.0189788	0.018914	0.0264489	0.0383716	0.0616488	0.0993064	0.161852	0.269403	0.340754	0.254711	0.138982	0.062825	0.0278241	0.014305	0.00988804	0.0104758	0.0165241	0.0321455	0.0543692	0.0461235	0.0101803	101389	11.93	0.069	104075	-0.22	20621	2018	11	9	10	7	7	0.0793
2018-10-31 07:54:59	0	0	0	0	0.00100373	0.00570572	0.00785397	0.0114102	0.0275107	0.0568977	0.0564585	0.0422458	0.0307612	0.023621	0.0170279	0.014029	0.0122265	0.0146468	0.0181165	0.0256626	0.0363256	0.0561264	0.101809	0.204095	0.329063	0.429687	0.39944	0.261382	0.129408	0.0545855	0.0244975	0.0143114	0.0115714	0.010697	0.00786346	0.0033695	101615	11.8	0.069	104527	-0.21	20.62	2018	11	9	10	7	8	0.0794
2018-10-31 07:54:59	0	0	0	0	0.00140719	0.00663732	0.00765666	0.00954589	0.0224919	0.0479594	0.0556921	0.0523905	0.0488073	0.0484082	0.0441573	0.0419806	0.0380438	0.0409507	0.040783	0.0436204	0.0465346	0.0542435	0.0737346	0.120042	0.179258	0.248178	0.285287	0.263943	0.195075	0.12376	0.0791307	0.0596085	0.0571184	0.0600008	0.0502846	0.0174668	100634	11.75	0.069	104151	-0.21	20.62	2018	11	9	10	7	9	0.0793
2018-10-31 07:54:59	0	0	0	0	0.00104937	0.0058143	0.0072801	0.00971671	0.0240744	0.0529383	0.05923	0.0511982	0.0425949	0.0362954	0.0274068	0.0228324	0.0198157	0.0241	0.030445	0.0467905	0.0718829	0.124015	0.237105	0.407019	0.467999	0.430544	0.334885	0.23138	0.148601	0.0950307	0.0706238	0.0649696	0.0701813	0.0760069	0.055667	0.0187555	100634	11.93	0.069	104075	-0.22	20.62	2018	11	9	10	7	10	0.0793
2018-10-31 07:54:59	0	0	0	0	0.00110087	0.00594553	0.00684301	0.00849037	0.0211221	0.0468706	0.0535882	0.0499	0.0461781	0.0451475	0.0386891	0.0339569	0.028487	0.0315436	0.0350253	0.0479396	0.0654435	0.0986044	0.162161	0.267077	0.361303	0.478265	0.577738	0.574537	0.431062	0.248594	0.122785	0.0570219	0.0262483	0.0116379	0.00444405	0.00122316	100559	11.8	0.069	104075	-0.22	20619	2018	11	9	10	7	11	0.0793
2018-10-31 07:54:59	0	0	0	0	0.00108545	0.00648821	0.00831048	0.0105451	0.0251768	0.0533394	0.0593031	0.0535754	0.0509506	0.0534073	0.0513616	0.0519185	0.049721	0.0582002	0.0629008	0.0708984	0.0796101	0.0875033	0.0987453	0.121464	0.146979	0.224238	0.399412	0.642835	0.725437	0.521047	0.284874	0.139674	0.0711379	0.0353163	0.013997	0.00367154	100483	11.75	0.069	1.04	-0.21	20618	2018	11	9	10	7	12	0.0794
2018-10-31 07:54:59	0	0	0	0	0.00125884	0.00569963	0.00695227	0.00953502	0.0227089	0.048653	0.0566284	0.0510091	0.0445285	0.0407441	0.0349176	0.0330911	0.0310787	0.0368205	0.0427807	0.0588527	0.0806215	0.130613	0.246246	0.463502	0.634542	0.713991	0.685623	0.579498	0.427155	0.265553	0.142237	0.0645624	0.0258946	0.0101959	0.00454542	0.00157741	10154	11.92	0.069	104376	-0.22	20618	2018	11	9	10	7	13	0.0794
2018-10-31 07:54:59	0	0	0	0	0.0012581	0.00658305	0.00830346	0.0108986	0.0250649	0.0509066	0.0556549	0.0477176	0.0417549	0.0388513	0.0328745	0.0291362	0.0252058	0.0271731	0.0279064	0.0324741	0.0376588	0.0484719	0.0707792	0.114909	0.168096	0.257999	0.392682	0.51924	0.508	0.346464	0.198033	0.121772	0.0906924	0.0685313	0.0394569	0.0143611	101087	11.79	0.069	103775	-0.21	20619	2018	11	9	10	7	14	0.0793
2018-10-31 07:54:59	0	0	0	0	0.00125718	0.00608864	0.00701498	0.0087612	0.0211874	0.046509	0.0544974	0.0507255	0.0445912	0.0396514	0.0306499	0.0250912	0.0206649	0.0227933	0.0255848	0.0354334	0.0490054	0.0797748	0.147518	0.251388	0.298315	0.306859	0.304494	0.314395	0.320962	0.300899	0.260957	0.206632	0.162069	0.11299	0.0651417	0.0196094	100936	11.75	0.069	104376	-0.2	20622	2018	11	9	10	7	15	0.0794
2018-10-31 07:54:59	0	0	0	0	0.00127739	0.0064261	0.00756066	0.00948556	0.0224419	0.0474371	0.0527134	0.0474453	0.0425842	0.0410443	0.0360401	0.032851	0.0282719	0.0304249	0.0316745	0.0411531	0.0533502	0.0821854	0.144435	0.25129	0.329169	0.374875	0.368581	0.315852	0.240517	0.174653	0.146614	0.153397	0.203046	0.241047	0.18116	0.0538232	101087	11.92	0.069	104301	-0.22	20622	2018	11	9	10	7	16	0.0793
2018-10-31 07:54:59	0	0	0	0	0.00165117	0.00796866	0.00879334	0.0101875	0.0231213	0.0468021	0.0509044	0.0429916	0.0359884	0.0309447	0.0236148	0.0194426	0.0162408	0.0184538	0.0214531	0.0308273	0.0442404	0.0782052	0.1654	0.336871	0.456328	0.445987	0.317244	0.180608	0.0965985	0.0580428	0.0464915	0.0501779	0.0665684	0.0824769	0.0711359	0.0281099	101238	11.79	0.069	104376	-0.22	20621	2018	11	9	10	7	17	0.0793
2018-10-31 07:54:59	0	0	0	0	0.00137754	0.00760076	0.00903184	0.0106704	0.0244184	0.049024	0.0496075	0.0423537	0.0377698	0.0382067	0.0371752	0.0390446	0.0388555	0.0475269	0.0539921	0.0676143	0.0845897	0.118687	0.192893	0.308053	0.340089	0.276364	0.164236	0.0797914	0.0383558	0.0227776	0.0208609	0.030093	0.0584008	0.107252	0.106107	0.0312613	0.995027	11.75	0.069	104301	-0.22	20621	2018	11	9	10	7	18	0.0794
2018-10-31 07:54:59	0	0	0	0	0.00110386	0.00577333	0.00723556	0.00980938	0.0239743	0.0515603	0.0567355	0.04728	0.038157	0.0316958	0.0245917	0.0219268	0.0204801	0.0258065	0.0330829	0.0485266	0.0711275	0.11277	0.196412	0.321135	0.37609	0.370642	0.314191	0.24356	0.185139	0.146826	0.129706	0.123003	0.12121	0.101693	0.0539726	0.0130438	100936	11.92	0.069	104301	-0.2	20.62	2018	11	9	10	7	19	0.0793
2018-10-31 07:54:59	0	0	0	0	0.0014942	0.00764502	0.00902492	0.0111044	0.0259301	0.0534867	0.055855	0.0455658	0.0354095	0.0280339	0.0196705	0.015322	0.0128833	0.0159152	0.0215033	0.0366493	0.0627168	0.114919	0.222244	0.304251	0.217983	0.100144	0.0360767	0.0130987	0.0057747	0.0036273	0.00397727	0.00863471	0.0316647	0.127314	0.265573	0.123885	101011	11.79	0.069	103925	-0.22	20621	2018	11	9	10	7	20	0.0793
2018-10-31 07:54:59	0	0	0	0	0	0.00488717	0.0064964	0.00931334	0.0231932	0.0516471	0.0616579	0.0565019	0.0509137	0.0475913	0.0389576	0.0336104	0.0288677	0.0337613	0.0409291	0.0619922	0.0940031	0.156711	0.276212	0.403544	0.385611	0.296788	0.19554	0.11721	0.0679737	0.0408088	0.029273	0.0266564	0.0313313	0.0390837	0.0361967	0.0138425	100785	11.75	0.069	103925	-0.22	20622	2018	11	9	10	7	21	0.0793
2018-10-31 07:54:59	0	0	0	0	0.00167601	0.00608269	0.00706662	0.00945103	0.0207364	0.0422547	0.0535823	0.0532164	0.0496074	0.0453562	0.0368849	0.032248	0.0298204	0.0366072	0.0475908	0.0698475	0.102726	0.149253	0.213537	0.25613	0.22333	0.171346	0.122797	0.0838022	0.0579582	0.042453	0.0373488	0.0410354	0.0538323	0.0717432	0.0634018	0.0244544	101087	11.91	0.069	104301	-0.22	20623	2018	11	9	10	7	22	0.0793
2018-10-31 07:54:59	0	0	0	0	0.00148789	0.00731208	0.00863779	0.0106158	0.0239047	0.0478117	0.0517892	0.0448667	0.0396618	0.0371953	0.031448	0.0276983	0.0232452	0.0249354	0.0262277	0.0350633	0.0467389	0.0798462	0.162325	0.32424	0.467714	0.550866	0.507514	0.355707	0.202955	0.100886	0.0498307	0.0277743	0.0191934	0.0170482	0.0161094	0.00922764	100785	11.79	0.069	1.04	-0.22	20622	2018	11	9	10	7	23	0.0793
2018-10-31 07:54:59	0	0	0	0	0.00203829	0.00889241	0.00919898	0.00967985	0.0210514	0.0420292	0.0471106	0.0452316	0.0429026	0.0422306	0.0357577	0.0289538	0.0212099	0.0192589	0.0171785	0.0199827	0.023221	0.0354026	0.067144	0.130217	0.182767	0.206249	0.194155	0.166189	0.137332	0.112608	0.0973135	0.0892297	0.0885069	0.0888873	0.0678462	0.0222774	0.999554	11.83	0.0619	103624	-0.2	20599	2018	11	9	10	8	5	0.0768
2018-10-31 07:54:59	0	0	0	0	0.00162646	0.00759432	0.00867164	0.0104579	0.0241204	0.0506272	0.0583674	0.0549878	0.0502207	0.0466982	0.0371828	0.0303488	0.0245417	0.0267884	0.0305314	0.0422778	0.0586017	0.0894348	0.151412	0.250309	0.308109	0.304237	0.230838	0.141742	0.0767881	0.0395794	0.0231617	0.0168683	0.0161105	0.017897	0.0179038	0.00898606	0.995782	11.93	0.0687	103699	-0.2	20595	2018	11	9	10	8	6	0.0791
2018-10-31 07:54:59	0	0	0	0	0.00160468	0.00690742	0.00827324	0.0104846	0.0231656	0.0466284	0.0534877	0.0480899	0.0414154	0.0360747	0.0277967	0.0229274	0.0190991	0.0215559	0.0259914	0.0398049	0.0609923	0.110133	0.224906	0.400469	0.444879	0.344093	0.198741	0.0981925	0.0478417	0.0261276	0.0190021	0.0183713	0.0224934	0.0281287	0.0249571	0.0087469	100861	11.84	0.0688	103925	-0.2	20594	2018	11	9	10	8	7	0.0792
2018-10-31 07:54:59	0	0	0	0	0.00175132	0.00737907	0.00804137	0.00966743	0.0220472	0.0459526	0.053554	0.0510126	0.0466749	0.0426233	0.0329865	0.0256723	0.0198201	0.0208652	0.0234067	0.0340544	0.0495678	0.0826104	0.148478	0.235306	0.268564	0.284144	0.295398	0.283542	0.231843	0.157479	0.100205	0.0665553	0.0512432	0.0480703	0.0442707	0.0201219	100785	11.75	0.0689	103699	-0.21	20594	2018	11	9	10	8	8	0.0793
2018-10-31 07:54:59	0	0	0	0	0.00132054	0.0065934	0.00824117	0.0106752	0.0245833	0.0502934	0.0535282	0.0457825	0.038096	0.0331829	0.0267147	0.0242649	0.0231843	0.02886	0.0352046	0.0453367	0.0582171	0.0705857	0.0857502	0.0933267	0.0806429	0.0733677	0.0847501	0.139959	0.302344	0.653358	110739	12347	0.900036	0.502381	0.239132	0.0717396	100333	11.94	0.0689	103925	-0.2	20593	2018	11	9	10	8	9	0.0793
2018-10-31 07:54:59	0	0	0	0	0.00148373	0.00726874	0.00860399	0.0104999	0.0235239	0.0471251	0.0515094	0.0475401	0.0459351	0.0499683	0.0509445	0.0524246	0.0491234	0.0533701	0.0522468	0.0578842	0.0640699	0.0821941	0.122063	0.176569	0.184187	0.154729	0.11041	0.0741352	0.0508072	0.0384539	0.0366111	0.0460979	0.0742359	0.128373	0.163988	0.0772936	0.998799	11.83	0.069	103925	-0.2	20593	2018	11	9	10	8	10	0.0793
2018-10-31 07:54:59	0	0	0	0	0.00193754	0.00894761	0.0100469	0.0111947	0.0237719	0.0455063	0.0483053	0.0441472	0.0420327	0.0435333	0.04143	0.0402496	0.0370523	0.0421697	0.0461321	0.0572984	0.071296	0.0905826	0.116408	0.123999	0.0923894	0.0593037	0.0356873	0.0219227	0.0144763	0.0110579	0.0118047	0.0197863	0.0529283	0.164737	0.314733	0.132673	100936	11.76	0.0689	103474	-0.2	20593	2018	11	9	10	8	11	0.0793
2018-10-31 07:54:59	0	0	0	0	0.00180297	0.00776294	0.00844695	0.00999558	0.0226535	0.0467687	0.0538325	0.050435	0.0460544	0.0431616	0.0361404	0.031735	0.0276963	0.0309858	0.0345828	0.0455581	0.0600122	0.085825	0.130958	0.189009	0.213217	0.223862	0.223861	0.216639	0.203406	0.180708	0.159042	0.139365	0.120437	0.0925557	0.0522552	0.0150017	100333	11.96	0.069	103925	-0.2	20593	2018	11	9	10	8	12	0.0793
2018-10-31 07:54:59	0	0	0	0	0.0010619	0.00555467	0.00737911	0.0101964	0.024246	0.0516191	0.0583975	0.051169	0.043043	0.036734	0.0275374	0.0225923	0.0188639	0.021624	0.0259756	0.0399413	0.0613531	0.116246	0.257556	0.5057	0.617828	0.532643	0.337851	0.170088	0.0750252	0.0323864	0.0163473	0.0108165	0.0101561	0.0116738	0.0130569	0.00701091	100559	11.83	0.069	103925	-0.2	20592	2018	11	9	10	8	13	0.0793
2018-10-31 07:54:59	0	0	0	0	0.00229612	0.00959741	0.00998266	0.0108028	0.0230917	0.0447689	0.0482584	0.0426538	0.0367358	0.0324936	0.025718	0.0214845	0.0180276	0.0202617	0.0236314	0.0351183	0.0523204	0.0923713	0.181084	0.275175	0.234082	0.134356	0.0619436	0.0294152	0.0170483	0.0131327	0.015034	0.0238921	0.045379	0.0735123	0.0701487	0.0217098	0.99729	11.77	0.069	103399	-0.19	20592	2018	11	9	10	8	14	0.0793
2018-10-31 07:54:59	0	0	0	0	0.00207828	0.00874382	0.00921734	0.0102412	0.0218464	0.0423782	0.0471135	0.0440221	0.0408551	0.0400398	0.0350281	0.0307371	0.0260908	0.0282085	0.0306453	0.0395449	0.051072	0.0707989	0.104853	0.147177	0.160766	0.163672	0.157532	0.139043	0.108007	0.078339	0.065261	0.0684805	0.0865576	0.100797	0.0751888	0.020294	100559	11.95	0.069	103474	-0.2	20591	2018	11	9	10	8	15	0.0793
2018-10-31 07:54:59	0	0	0	0	0	0.00280895	0.00358698	0.00472818	0.0199507	0.0651185	0.0624787	0.0384901	0.0251496	0.0197882	0.0146733	0.0134408	0.0127476	0.0186383	0.0248562	0.0386574	0.0597019	0.0858528	0.124656	0.129738	0.0730254	0.0316353	0.0123253	0.00609513	0.00639095	0.0213185	0.223934	314465	132497	579462	0.340284	0.0352692	0.998799	11.82	0.069	103624	-0.2	20591	2018	11	9	10	8	16	0.0793
2018-10-31 07:54:59	0	0	0	0	0.00160631	0.0076089	0.00883606	0.0105903	0.0238092	0.0481328	0.0527553	0.0477638	0.0428041	0.0400608	0.033016	0.0278621	0.0224525	0.0237107	0.0255386	0.036132	0.0511386	0.0910083	0.191057	0.351902	0.400156	0.30817	0.171235	0.0828926	0.040896	0.0231209	0.017048	0.017943	0.0260998	0.0388093	0.0403578	0.0152546	0.996536	11.75	0.069	103925	-0.21	20.59	2018	11	9	10	8	17	0.0793
2018-10-31 07:54:59	0	0	0	0	0.00217721	0.0091602	0.00947433	0.0101382	0.0217497	0.0426803	0.0470291	0.04315	0.0385592	0.0350865	0.0283261	0.0244882	0.0215613	0.0251141	0.0296304	0.0409158	0.0565352	0.0888252	0.15583	0.252388	0.281367	0.242508	0.165921	0.0989148	0.0572316	0.0357687	0.0285676	0.0305586	0.0424512	0.0589228	0.0554745	0.0190334	100106	11.95	0.069	103474	-0.2	20589	2018	11	9	10	8	18	0.0793
2018-10-31 07:54:59	0	0	0	0	0.00124392	0.00688234	0.0087138	0.0114214	0.0270217	0.0554415	0.0565815	0.0443285	0.0351282	0.0304964	0.0260903	0.0263367	0.0273215	0.0360052	0.0449032	0.0590756	0.0775431	0.112823	0.192595	0.351798	0.482757	0.51962	0.39674	0.204382	0.0726612	0.0203982	0.00580549	0.00197714	0	0	0	0	101389	11.82	0.069	10385	-0.2	20589	2018	11	9	10	8	19	0.0793
2018-10-31 07:54:59	0	0	0	0	0.00191891	0.00865461	0.00934828	0.011088	0.0255103	0.0519571	0.0546473	0.0449648	0.0364042	0.0311801	0.0252471	0.0230151	0.0220886	0.0282943	0.0369643	0.056914	0.0879135	0.135337	0.205306	0.239678	0.183155	0.118989	0.0721006	0.0427826	0.0259428	0.0172262	0.0150619	0.0194174	0.0359467	0.0756917	0.101329	0.0410628	100182	11.75	0.069	103549	-0.19	20589	2018	11	9	10	8	20	0.0793
2018-10-31 07:54:59	0	0	0	0	0.00188561	0.00924014	0.00999639	0.011251	0.0253794	0.0506103	0.0520618	0.044716	0.039276	0.0377848	0.0340178	0.0328805	0.0310848	0.0376867	0.0443471	0.0617863	0.0861328	0.135876	0.236719	0.357504	0.347176	0.24697	0.131991	0.0582185	0.0250764	0.0128355	0.00970016	0.0118329	0.0210636	0.0420889	0.0510468	0.0176406	100257	11.94	0.069	103474	-0.2	20588	2018	11	9	10	8	21	0.0793
2018-10-31 07:54:59	0	0	0	0	0.00137569	0.00677298	0.00817129	0.0101598	0.02306	0.0465386	0.0490805	0.0429263	0.0379825	0.0363494	0.0324144	0.0316979	0.0308613	0.0379024	0.0447502	0.0560511	0.070126	0.0918833	0.134899	0.215584	0.285152	0.323689	0.283156	0.18596	0.0950241	0.0405633	0.0166867	0.0070769	0.00315517	0.00131981	0	0	100257	11.81	0.069	103323	-0.22	20588	2018	11	9	10	8	22	0.0793
2018-10-31 07:54:59	0	0	0	0	0.00157982	0.00658031	0.00802187	0.0106507	0.0231269	0.0453356	0.0524957	0.0495019	0.0472847	0.0474844	0.0429488	0.0390267	0.0336744	0.0365022	0.0398181	0.0541499	0.073741	0.112265	0.182183	0.248575	0.229348	0.167987	0.109246	0.0749769	0.0588922	0.051297	0.0526398	0.0633597	0.0903669	0.112858	0.0894114	0.0235246	0.998799	11.75	0.069	10385	-0.2	20588	2018	11	9	10	8	23	0.0793
2018-10-31 07:54:59	0	0	0	0	0.00259258	0.00899824	0.00870769	0.00944234	0.0199345	0.0391776	0.0461259	0.046673	0.0461976	0.0469296	0.0419433	0.0370848	0.0320544	0.0348251	0.0377929	0.0480928	0.061351	0.0823338	0.115317	0.128079	0.089418	0.046316	0.0206273	0.00973143	0.0057291	0.00467197	0.00597471	0.0115725	0.0313715	0.0872722	0.129993	0.0361322	100333	11.93	0.069	103775	-0.21	20587	2018	11	9	10	8	24	0.0793
2018-10-31 07:54:59	0	0	0	0	0.00171065	0.00759757	0.00858708	0.0108098	0.0250321	0.0520045	0.058471	0.0523203	0.0463007	0.0426792	0.0360799	0.033081	0.0310998	0.0381707	0.0468406	0.0653188	0.0912395	0.1313	0.197111	0.251491	0.21884	0.160564	0.111857	0.0828352	0.0702359	0.0666596	0.0731715	0.0832515	0.0906327	0.0776799	0.0402584	0.00836486	100106	11.8	0.069	10385	-0.23	20586	2018	11	9	10	8	25	0.0793
2018-10-31 07:54:59	0	0	0	0	0	0.0031224	0.0045814	0.00770783	0.021664	0.0546296	0.0710844	0.0680953	0.0616837	0.0552929	0.0404961	0.0293213	0.0199592	0.0184282	0.0175616	0.0244099	0.0338153	0.0685075	0.185639	0.485139	0.760244	0.779661	0.578278	0.373066	0.239684	0.171525	0.147426	0.146475	0.155226	0.143719	0.0984831	0.0306451	0.995782	11.75	0.069	103323	-0.21	20586	2018	11	9	10	8	26	0.0793
2018-10-31 07:54:59	0	0	0	0	0.00154024	0.00768512	0.00951378	0.0121793	0.0277217	0.0560472	0.0610337	0.0504824	0.0414735	0.0356485	0.0280873	0.0244472	0.0217852	0.0258811	0.0313484	0.0430769	0.0591238	0.0879261	0.147214	0.257602	0.35607	0.423118	0.419697	0.354045	0.257285	0.160341	0.0903215	0.0483511	0.0256766	0.0139308	0.00679928	0.00208497	100257	11.93	0.069	103323	-0.22	20586	2018	11	9	10	8	27	0.0793
2018-10-31 07:54:59	0	0	0	0	0.0024175	0.0094757	0.0100402	0.0112131	0.0235105	0.0451204	0.0501063	0.0449851	0.03817	0.0321639	0.0245645	0.0209491	0.019304	0.023876	0.0305661	0.0438983	0.0631613	0.0927614	0.13769	0.174427	0.16063	0.137691	0.122009	0.119956	0.125964	0.129812	0.132887	0.132525	0.140026	0.140557	0.113339	0.0389855	100257	11.79	0.069	103399	-0.22	20586	2018	11	9	10	8	28	0.0793
2018-10-31 07:54:59	0	0	0	0	0.0026688	0.00842921	0.00958946	0.0117808	0.0223979	0.0397431	0.0473161	0.0461768	0.0443048	0.0425193	0.037387	0.0351087	0.0342544	0.041483	0.0507844	0.0656954	0.0850002	0.102665	0.116187	0.111318	0.0874824	0.0726469	0.0718264	0.0907604	0.142701	0.245041	0.399476	0.517091	0.505312	0.328752	0.137743	0.0352119	100106	11.74	0.069	103248	-0.22	20585	2018	11	9	10	8	29	0.0793
2018-10-31 07:54:59	0	0	0	0	0.00145986	0.0080371	0.00899826	0.0103389	0.0244508	0.0507463	0.0519473	0.0436604	0.0377511	0.0358141	0.0308036	0.0277421	0.024168	0.0285874	0.0346651	0.0545036	0.0857	0.14291	0.240908	0.316053	0.273664	0.222053	0.210475	0.257936	0.354011	0.437848	0.432208	0.325247	0.190751	0.0967783	0.0522694	0.0188008	100559	11.91	0.069	10385	-0.21	20585	2018	11	9	10	8	30	0.0793
2018-10-31 07:54:59	0	0	0	0	0.0015504	0.0075519	0.00895168	0.0109452	0.0246164	0.0496811	0.0552202	0.0504118	0.0470282	0.0483726	0.0469501	0.0480456	0.0469547	0.0552078	0.060546	0.0736288	0.0896175	0.116638	0.162654	0.200583	0.170393	0.113043	0.0600177	0.0279154	0.0128846	0.00719043	0.00634517	0.0100394	0.0263099	0.0780401	0.136306	0.0614	100333	11.79	0.069	103399	-0.21	20585	2018	11	9	10	8	31	0.0793
2018-10-31 07:54:59	0	0	0	0	0.00122955	0.00685155	0.00869699	0.0114452	0.0275919	0.0588776	0.0648221	0.0571357	0.0502584	0.0467949	0.03808	0.0318152	0.0259712	0.0286725	0.0325221	0.0467188	0.0672505	0.106978	0.182195	0.25778	0.24225	0.193657	0.14595	0.11147	0.089267	0.0773762	0.077888	0.0898818	0.110218	0.12452	0.0958506	0.0324933	0.988238	11.75	0.069	103399	-0.2	20585	2018	11	9	10	8	32	0.0793
2018-10-31 07:54:59	0	0	0	0	0.00100196	0.00542791	0.0070828	0.00983718	0.0243565	0.0541719	0.064373	0.0586038	0.0519425	0.0478142	0.0388343	0.0335383	0.0283218	0.031455	0.0349619	0.0485138	0.0671664	0.117051	0.245096	0.487776	0.635487	0.616873	0.465322	0.288403	0.152288	0.0767974	0.0442623	0.0321722	0.0314424	0.0371051	0.0412363	0.018507	100333	11.91	0.069	103323	-0.2	20584	2018	11	9	10	8	33	0.0793
2018-10-31 07:54:59	0	0	0	0	0.00172353	0.00832846	0.00966586	0.0114639	0.0255	0.0506905	0.0529001	0.0448553	0.0367693	0.0313558	0.0248404	0.0223779	0.0218834	0.0291757	0.0398997	0.0584885	0.0860697	0.115451	0.148561	0.147917	0.0967157	0.0513398	0.0247562	0.0126404	0.00773781	0.00642311	0.00834558	0.0171841	0.0503762	0.144989	0.2147	0.0653039	0.995782	11.78	0.069	103323	-0.22	20584	2018	11	9	10	8	34	0.0793
2018-10-31 07:54:59	0	0	0	0	0.00169408	0.00803485	0.00917368	0.0108879	0.0242215	0.048054	0.0511685	0.0449133	0.0399717	0.0386856	0.034849	0.0324465	0.0283513	0.0306718	0.0320325	0.0408823	0.0521208	0.0807363	0.147366	0.263305	0.327261	0.322281	0.268488	0.197372	0.124223	0.066636	0.0365534	0.0239125	0.0193769	0.0165812	0.0111898	0.00313352	100634	11.75	0.069	103775	-0.2	20584	2018	11	9	10	8	35	0.0793
2018-10-31 07:54:59	0	0	0	0	0.00207462	0.00872852	0.00982014	0.0112548	0.0235294	0.044463	0.0476669	0.041791	0.0365801	0.0338456	0.0294094	0.0279295	0.0266932	0.0318416	0.0369599	0.0480638	0.0626279	0.0893229	0.13844	0.177441	0.139537	0.0759702	0.0314831	0.0121214	0.00531437	0.00317666	0.00329694	0.00641408	0.0226629	0.0948562	0.245788	0.144596	100031	11.9	0.069	103399	-0.21	20584	2018	11	9	10	8	36	0.0793
2018-10-31 07:54:59	0	0	0	0	0.0010562	0.00606578	0.00816115	0.011485	0.0279357	0.0590495	0.0614238	0.0479083	0.036739	0.030084	0.0226278	0.0185812	0.0150958	0.0161982	0.0174389	0.0243459	0.0339096	0.0606002	0.134984	0.298502	0.444994	0.506036	0.471146	0.393737	0.302376	0.202236	0.120004	0.0699859	0.0425043	0.0274704	0.013609	0.00404107	100408	11.78	0.069	103399	-0.22	20584	2018	11	9	10	8	37	0.0793
2018-10-31 07:54:59	0	0	0	0	0.00122327	0.00654997	0.00812223	0.0100891	0.0227662	0.0453742	0.0481284	0.0426981	0.0406448	0.0444245	0.0479288	0.0553382	0.0584051	0.0675731	0.0654058	0.0628274	0.0599655	0.0633082	0.0782368	0.112614	0.144057	0.180707	0.223493	0.28949	0.401038	0.530093	0.604436	0.492048	0.293209	0.142246	0.0664902	0.0210633	100559	11.75	0.069	103248	-0.22	20584	2018	11	9	10	8	38	0.0793
2018-10-31 07:54:59	0	0	0	0	0.00206743	0.00885494	0.00977956	0.0110253	0.0233281	0.0446167	0.0476594	0.0430112	0.0382005	0.0353932	0.0295855	0.0263109	0.0236238	0.0276478	0.0325943	0.044209	0.0600933	0.0884426	0.140435	0.191225	0.171282	0.117177	0.0653962	0.0333969	0.0174199	0.0107618	0.00998363	0.0152894	0.0363952	0.0927527	0.135472	0.0501688	100483	11.9	0.069	103248	-0.22	20584	2018	11	9	10	8	39	0.0793
2018-10-31 07:54:59	0	0	0	0	0.00252048	0.0104043	0.00986676	0.0100206	0.0220994	0.0441791	0.0465285	0.042364	0.0377583	0.035276	0.0295763	0.0254326	0.0214319	0.0231072	0.0245803	0.0315018	0.040449	0.0588865	0.0974397	0.147163	0.147745	0.110607	0.0655029	0.0358935	0.0215143	0.0157359	0.0170006	0.0271126	0.0594112	0.127278	0.143198	0.0388595	0.988992	11.77	0.069	103699	-0.22	20583	2018	11	9	10	8	40	0.0793
2018-10-31 07:54:59	0	0	0	0	0.00167726	0.00793855	0.00953802	0.0114658	0.0248784	0.0485082	0.0518625	0.0455281	0.0397598	0.0366767	0.0309857	0.0285478	0.0272753	0.0350758	0.0464924	0.0696975	0.104867	0.150907	0.207293	0.197586	0.111981	0.0498389	0.0211628	0.0100633	0.00613086	0.00522494	0.00683264	0.0140481	0.0403438	0.126153	0.221657	0.0982297	100861	11.74	0.069	103699	-0.22	20583	2018	11	9	10	8	41	0.0793
2018-10-31 07:54:59	0	0	0	0	0.00149579	0.00800379	0.00923789	0.011048	0.0262935	0.0555303	0.0602602	0.052009	0.044719	0.0408982	0.0340436	0.0304738	0.0272411	0.0324762	0.0387033	0.0550933	0.078584	0.124634	0.214588	0.301058	0.259546	0.167204	0.0887683	0.0450072	0.0248317	0.0170785	0.0162053	0.0206751	0.0326754	0.051429	0.0536494	0.0184134	0.993518	11.9	0.069	103699	-0.21	20583	2018	11	9	10	8	42	0.0793
2018-10-31 07:54:59	0	0	0	0	0.00200424	0.00868931	0.0095985	0.0108676	0.0232971	0.0456453	0.0506784	0.0466956	0.041785	0.0384652	0.0308017	0.0249587	0.0194894	0.0198081	0.0205472	0.0276685	0.0372772	0.0650133	0.13943	0.278203	0.344929	0.278883	0.147679	0.0574258	0.0197091	0.00762086	0.00447874	0.00474921	0.00963423	0.0286737	0.0661171	0.0494081	101087	11.77	0.069	103323	-0.21	20583	2018	11	9	10	8	43	0.0793
2018-10-31 07:54:59	0	0	0	0	0.00156766	0.00717683	0.00835427	0.0103876	0.0239681	0.0502043	0.057017	0.0515908	0.0441907	0.0385222	0.0306345	0.0271077	0.0250976	0.0303236	0.0364966	0.0505182	0.0700873	0.10451	0.165212	0.217803	0.185293	0.125038	0.0767394	0.0495303	0.0351232	0.0284629	0.0289422	0.0356496	0.0496555	0.0609785	0.0474423	0.0129571	10154	11.92	0.069	103399	-0.22	20583	2018	11	9	10	8	44	0.0793
2018-10-31 07:54:59	0	0	0	0	0.00194981	0.00838292	0.009542	0.0112838	0.0239113	0.0457403	0.0499856	0.0438544	0.0383705	0.0349997	0.0297345	0.0278207	0.0271999	0.0351357	0.0464281	0.0683331	0.100935	0.141381	0.187948	0.180623	0.106983	0.0482773	0.0188901	0.00768993	0.00391086	0.00292457	0.00388212	0.0090474	0.0306017	0.0958234	0.144742	0.0485017	100483	11.89	0.069	103399	-0.22	20582	2018	11	9	10	8	45	0.0793
2018-10-31 07:54:59	0	0	0	0	0.00157494	0.00754749	0.00898809	0.0109217	0.0242988	0.0487171	0.0527574	0.046723	0.0408017	0.0377851	0.0324841	0.0309401	0.0302086	0.0383111	0.0482414	0.0691132	0.0992352	0.145144	0.212628	0.245226	0.184133	0.112853	0.0629943	0.0357636	0.0228297	0.0186619	0.0230308	0.0421932	0.0931462	0.183328	0.205456	0.0842575	100257	11.76	0.069	103474	-0.22	20582	2018	11	9	10	8	46	0.0793
2018-10-31 07:54:59	0	0	0	0	0	0.00271265	0.00406275	0.00679674	0.0197786	0.0498654	0.0596345	0.0517198	0.0446574	0.0420936	0.0372894	0.0367363	0.0355308	0.0436789	0.0505193	0.0651705	0.0834676	0.0998894	0.115211	0.110125	0.0816866	0.0690124	0.0824997	0.155196	0.421885	132651	327094	400775	214494	0.776986	0.307993	0.0800395	0.990501	11.9	0.069	103699	-0.22	20582	2018	11	9	10	8	47	0.0793
2018-10-31 07:54:59	0	0	0	0	0.00212101	0.00825076	0.00914273	0.0106299	0.0225754	0.0447401	0.0534461	0.0520788	0.0474461	0.0424869	0.0329882	0.0276384	0.0244454	0.0294977	0.0377856	0.0571566	0.0866731	0.142355	0.242199	0.315144	0.248044	0.148119	0.0808719	0.0474799	0.0319733	0.0256953	0.0257801	0.0312325	0.0413018	0.0457714	0.0292437	0.00673846	0.990501	11.88	0.069	103699	-0.22	20582	2018	11	9	10	8	48	0.0793
2018-10-31 07:54:59	0	0	0	0	0.0010868	0.00567775	0.00691499	0.00932522	0.0235017	0.0526147	0.0608358	0.053124	0.0448333	0.0389266	0.0306463	0.0257659	0.0211131	0.0218335	0.0219287	0.026244	0.0311546	0.042256	0.0658983	0.114328	0.179757	0.312845	0.602305	116865	180425	163161	0.753231	0.200592	0.0414653	0.00918909	0.00257113	0	100483	11.76	0.069	103399	-0.22	20581	2018	11	9	10	8	49	0.0793
2018-10-31 07:54:59	0	0	0	0	0.0022044	0.00938807	0.00978394	0.010185	0.0215188	0.0423367	0.0492607	0.0492601	0.0483251	0.0487467	0.042504	0.0377046	0.0330169	0.0373828	0.042318	0.0553599	0.072592	0.101229	0.147508	0.168802	0.117758	0.0583863	0.0228468	0.00859746	0.00380979	0.00248739	0.00304267	0.00731966	0.0308458	0.150495	0.387273	0.193064	0.994273	11.93	0.069	103323	-0.21	20581	2018	11	9	10	8	50	0.0793
2018-10-31 07:54:59	0	0	0	0.00159412	0.0065168	0.0149327	0.0166986	0.0187781	0.0289779	0.0428597	0.0471038	0.0480076	0.0484405	0.050799	0.0500939	0.0516095	0.0526577	0.0621107	0.0741329	0.0902815	0.109384	0.12243	0.131126	0.140387	0.147499	0.170059	0.209733	0.274986	0.414509	0.722288	132415	194881	220405	213246	1772	0.791271	100257	11.88	0.069	103173	-0.22	20.58	2018	11	9	10	8	51	0.0793
2018-10-31 07:54:59	0	0	0	0	0.00132145	0.00703266	0.00806253	0.00986405	0.0243844	0.0539177	0.0601285	0.0542269	0.0477195	0.044252	0.0368896	0.0328814	0.0295225	0.0356807	0.0436151	0.0648806	0.0968505	0.14942	0.231658	0.253766	0.156125	0.0686147	0.0246403	0.00877286	0.00380981	0.00257584	0.00332114	0.00786319	0.027714	0.0907437	0.145941	0.0493108	100559	11.77	0.069	103323	-0.22	20.58	2018	11	9	10	8	52	0.0793
2018-10-31 07:54:59	0	0	0	0	0.0016834	0.00734111	0.00825216	0.0102244	0.0234771	0.0486377	0.0547264	0.0489439	0.0423046	0.0380296	0.0315941	0.0279396	0.0243842	0.0265489	0.0283769	0.0350244	0.043123	0.0576507	0.0854361	0.138405	0.196792	0.277521	0.372844	0.460403	0.460242	0.325761	0.183685	0.0919794	0.0523743	0.0301042	0.0148515	0.00466602	0.999554	11.93	0.069	103699	-0.22	20579	2018	11	9	10	8	53	0.0793
2018-10-31 07:54:59	0	0	0	0	0.00212331	0.00969515	0.0103387	0.0111552	0.0238977	0.0459324	0.0486173	0.0440328	0.0418594	0.0439803	0.0430456	0.0444385	0.0446869	0.0558681	0.0656513	0.0816758	0.101697	0.129983	0.174415	0.203779	0.164725	0.110923	0.0684586	0.0430252	0.0296433	0.023679	0.0244478	0.0326944	0.0522412	0.0830068	0.0915461	0.0394336	100333	11.87	0.069	103248	-0.22	20579	2018	11	9	10	8	54	0.0793
2018-10-31 07:54:59	0	0	0	0	0.00279798	0.0109559	0.0111456	0.011622	0.0235589	0.043287	0.0453401	0.0395623	0.0344594	0.0313444	0.0268446	0.0253985	0.0251447	0.0318057	0.0399212	0.0535836	0.0721625	0.0913966	0.111097	0.103322	0.0634712	0.0320296	0.0147657	0.00707453	0.00407448	0.00318405	0.00406448	0.00851695	0.0261438	0.0814247	0.129657	0.0416372	0.998045	11.76	0.069	103699	-0.22	20579	2018	11	9	10	8	55	0.0793
2018-10-31 07:54:59	0	0	0	0	0.00178055	0.0087437	0.00984037	0.0112699	0.0248908	0.0490259	0.0517078	0.0448709	0.0403152	0.0392674	0.0352649	0.0336462	0.0318469	0.0394692	0.0486155	0.0672462	0.0931805	0.13108	0.189903	0.235873	0.205403	0.146893	0.0884098	0.0494164	0.029929	0.0227577	0.0247072	0.0387052	0.0780661	0.136295	0.126276	0.0355018	100408	11.93	0.069	103173	-0.22	20579	2018	11	9	10	8	56	0.0793
2018-10-31 07:54:59	0	0	0	0	0.00159916	0.00727849	0.00867019	0.0111651	0.0255111	0.051972	0.0558106	0.0468582	0.0375582	0.0306954	0.0231311	0.0197463	0.0182715	0.0233214	0.0313106	0.0474575	0.0721761	0.109892	0.17369	0.2253	0.185364	0.112235	0.0538456	0.0236758	0.0112197	0.00680033	0.00663175	0.0111915	0.0303806	0.0882702	0.135231	0.0463934	100257	11.85	0.069	103323	-0.22	20578	2018	11	9	10	8	57	0.0793
2018-10-31 07:54:59	0	0	0	0	0.00168677	0.0076677	0.00887983	0.010617	0.0236082	0.0480176	0.0560595	0.0526116	0.0480718	0.0442644	0.0347002	0.027577	0.0211506	0.0214906	0.0226177	0.0307404	0.0416573	0.0691234	0.131828	0.251724	0.375616	0.497208	0.551075	0.509096	0.416671	0.32891	0.270115	0.231191	0.205728	0.155311	0.0784158	0.0227826	100408	11.75	0.069	103248	-0.23	20578	2018	11	9	10	8	58	0.0793
2018-10-31 07:54:59	0	0	0	0	0	0.00531131	0.00714201	0.0105141	0.0268211	0.0591972	0.0655128	0.0536964	0.0438577	0.0380431	0.0318302	0.0313559	0.0325339	0.0453358	0.0632604	0.0976859	0.151046	0.228549	0.344173	0.418085	0.338882	0.231623	0.147913	0.0970993	0.0705321	0.0589973	0.0590661	0.0685043	0.0887018	0.106354	0.0876821	0.0279645	0.999554	11.95	0.069	103699	-0.22	20578	2018	11	9	10	8	59	0.0793
2018-10-31 07:54:59	0	0	0	0	0.00255501	0.010764	0.0110776	0.0111224	0.0224596	0.0414487	0.0428917	0.0392215	0.0365883	0.0368797	0.0343101	0.0337715	0.033076	0.0409433	0.0494464	0.0643849	0.0840349	0.106517	0.132878	0.131306	0.0872007	0.0487178	0.024802	0.0124889	0.00704544	0.00536239	0.00675793	0.0142102	0.0452366	0.145295	0.222667	0.0687125	0.998045	11.85	0.069	103248	-0.22	20578	2018	11	9	10	9	0	0.0793
2018-10-31 07:54:59	0	0	0	0	0.00191086	0.00802283	0.00899711	0.0106297	0.0229507	0.0453013	0.0520356	0.0482762	0.043609	0.0397237	0.0317604	0.0261864	0.0215804	0.0234771	0.0264808	0.0370364	0.0519504	0.0805541	0.131083	0.172691	0.148753	0.104158	0.0661182	0.0423801	0.0288417	0.0215617	0.020453	0.0264533	0.0514054	0.11817	0.195887	0.0948341	100483	11.76	0.069	103624	-0.22	20578	2018	11	9	10	9	1	0.0793
2018-10-31 07:54:59	0	0	0	0	0.00192282	0.00991265	0.0111685	0.0121555	0.0258069	0.0479698	0.046599	0.037931	0.0319009	0.028181	0.0223518	0.0186918	0.0153051	0.0169928	0.0192606	0.0274073	0.0390034	0.0695256	0.152087	0.317073	0.409881	0.327071	0.159713	0.0585679	0.0215524	0.0102553	0.00777285	0.00948404	0.0159575	0.025207	0.0223569	0.00719897	100333	11.94	0.069	103248	-0.22	20578	2018	11	9	10	9	2	0.0793
2018-10-31 07:54:59	0	0	0	0	0.00152858	0.00775257	0.00906582	0.0110852	0.0259086	0.0542802	0.0600564	0.0522153	0.0433047	0.0371115	0.02943	0.0268429	0.0264374	0.0354916	0.0481065	0.0739827	0.114113	0.179925	0.284901	0.325158	0.211202	0.0984443	0.0388667	0.016089	0.0082543	0.00597203	0.00690006	0.0124072	0.0297396	0.0694595	0.098302	0.0415822	100333	11.85	0.069	103699	-0.23	20577	2018	11	9	10	9	3	0.0793
2018-10-31 07:54:59	0	0	0	0	0	0.00584274	0.00794875	0.0112594	0.0273054	0.0572128	0.0602352	0.0489084	0.041553	0.0391014	0.0344873	0.033168	0.0315517	0.0391896	0.0477149	0.0659344	0.0910562	0.129476	0.195773	0.283215	0.315512	0.327159	0.325677	0.307507	0.252855	0.174796	0.112047	0.0745636	0.0562242	0.0427013	0.0268376	0.0083716	0.998045	11.75	0.069	103023	-0.22	20577	2018	11	9	10	9	4	0.0793
2018-10-31 10:54:59	0	0	0	0	0	0.00264151	0.00466797	0.00913729	0.025298	0.0590222	0.063293	0.0497081	0.0380509	0.0318328	0.0265252	0.0256789	0.0261742	0.0350334	0.0468659	0.0693434	0.103059	0.127238	0.142127	0.105665	0.0474161	0.0167854	0.00539104	0.00185604	0	0	0	0.00269823	0.0163248	0.107293	0.282016	0.12082	102671	11.83	0.0619	105504	-0.2	20601	2018	11	9	10	16	42	0.0768
2018-10-31 10:54:59	0	0	0	0	0	0.00243711	0.00375311	0.00654137	0.0185003	0.0472775	0.0627919	0.062892	0.0596818	0.0581247	0.0471717	0.0382235	0.0290922	0.0290726	0.0293259	0.0385726	0.0506137	0.0818885	0.160819	0.317124	0.444402	0.500739	0.480382	0.415959	0.318925	0.206395	0.115671	0.0593063	0.0300429	0.0152482	0.00700001	0.00233519	102671	11.94	0.0687	105955	-0.21	20598	2018	11	9	10	16	43	0.0791
2018-10-31 10:54:59	0	0	0	0	0	0.00355692	0.00463489	0.00676104	0.0165826	0.0374484	0.049577	0.0521394	0.0534343	0.0548641	0.0449616	0.0327849	0.0208766	0.0167872	0.0139826	0.0163606	0.0190464	0.0270809	0.0454096	0.0889914	0.163285	0.307516	0.560759	0.841275	0.785074	0.375508	0.107995	0.0255944	0.00652521	0.0020204	0	0	103501	11.84	0.0688	10588	-0.2	20597	2018	11	9	10	16	44	0.0792
2018-10-31 10:54:59	0	0	0	0	0.00117745	0.00558981	0.00642308	0.00783532	0.0181693	0.0384943	0.0465369	0.0466504	0.0464551	0.0482394	0.0425001	0.0359004	0.0280232	0.0276417	0.0269514	0.0334623	0.0416037	0.0612237	0.103111	0.15423	0.149562	0.103575	0.0538632	0.0249323	0.0124842	0.00820796	0.00892908	0.0168522	0.0510323	0.159686	0.251932	0.0832348	102218	11.75	0.0689	105955	-0.2	20596	2018	11	9	10	16	45	0.0793
2018-10-31 10:54:59	0	0	0	0	0	0.00371556	0.0052557	0.00804232	0.0206774	0.0474486	0.0573146	0.0535404	0.0501024	0.050826	0.0470568	0.0448835	0.0404068	0.0428449	0.0412868	0.0437951	0.0463785	0.0513252	0.0620189	0.0774927	0.0841298	0.0956856	0.116631	0.149333	0.182291	0.191919	0.178654	0.153154	0.130874	0.104196	0.0627174	0.0191293	102143	11.96	0.0689	105279	-0.2	20594	2018	11	9	10	16	46	0.0793
2018-10-31 10:54:59	0	0	0	0	0.00117293	0.00510444	0.00613157	0.00803034	0.018526	0.0391513	0.0470444	0.0448617	0.0402137	0.035719	0.0276014	0.0225553	0.0188671	0.021282	0.0254357	0.0385183	0.0585123	0.0962909	0.163869	0.212274	0.165849	0.0955887	0.0473163	0.0245269	0.0151443	0.0119447	0.0138306	0.0239204	0.0603881	0.158238	0.265698	0.10882	102822	11.84	0.0689	105504	-0.19	20593	2018	11	9	10	16	47	0.0793
2018-10-31 10:54:59	0	0	0	0	0	0.0038399	0.00480262	0.00709002	0.0185779	0.0438404	0.0555636	0.051073	0.0432604	0.0360266	0.0274781	0.0246456	0.0250789	0.0350755	0.0505375	0.0756506	0.113685	0.144907	0.167059	0.138516	0.0742189	0.0331091	0.0142312	0.00699629	0.00462661	0.00463131	0.00774408	0.0202029	0.0671519	0.187753	0.216883	0.0506928	102671	11.76	0.0689	105579	-0.2	20593	2018	11	9	10	16	48	0.0793
2018-10-31 10:54:59	0	0	0	0	0	0.00420672	0.00525473	0.00726894	0.0176193	0.0393834	0.0498178	0.0482335	0.0434135	0.0393032	0.0323361	0.0304512	0.0304711	0.0400108	0.0533027	0.0766609	0.110382	0.156007	0.22128	0.274585	0.248129	0.195857	0.137707	0.0879794	0.0524164	0.0322897	0.0242068	0.0225218	0.0253231	0.029039	0.025551	0.0103508	101992	11.96	0.0689	105354	-0.2	20592	2018	11	9	10	16	49	0.0793
2018-10-31 10:54:59	0	0	0	0	0	0.00335534	0.00457613	0.00695594	0.0177008	0.0411585	0.0529299	0.055908	0.0584493	0.0647474	0.064294	0.0667472	0.0674133	0.0832952	0.0965463	0.117042	0.141902	0.168655	0.203234	0.217927	0.178005	0.132511	0.0879811	0.0515781	0.0290154	0.0200699	0.0219624	0.0409273	0.106677	0.241783	0.258451	0.0828865	102596	11.83	0.069	105429	-0.2	20592	2018	11	9	10	16	50	0.0793
2018-10-31 10:54:59	0	0	0	0	0	0.00272398	0.00437492	0.00821376	0.0227471	0.0557197	0.0694958	0.0598752	0.0475952	0.0372717	0.0259723	0.0211801	0.019077	0.0250349	0.0357989	0.0640489	0.114729	0.214162	0.409781	0.597355	0.53016	0.35662	0.207418	0.12016	0.075588	0.0567505	0.0536084	0.0656604	0.0932185	0.122343	0.107631	0.0417032	102445	11.77	0.069	10588	-0.21	20592	2018	11	9	10	16	51	0.0793
2018-10-31 10:54:59	0	0	0	0	0.00136326	0.00584025	0.00645198	0.00783596	0.0185069	0.0408027	0.0515158	0.0523033	0.0484372	0.0432523	0.0316682	0.0233291	0.0173605	0.0178184	0.019705	0.029184	0.0433846	0.074866	0.141024	0.203654	0.165991	0.086139	0.0313948	0.00995195	0.00349645	0.00173301	0.0016147	0.00329529	0.0136789	0.0706749	0.207415	0.12401	102747	11.95	0.069	10588	-0.19	20592	2018	11	9	10	16	52	0.0793
2018-10-31 10:54:59	0	0	0	0	0	0.00262393	0.00417115	0.00773898	0.0205764	0.048749	0.0614136	0.0561233	0.0477355	0.0412914	0.0322374	0.0268987	0.0230657	0.025682	0.029117	0.0404545	0.0564296	0.07732	0.104509	0.09503	0.0481876	0.0171315	0.00515993	0.00168169	0	0	0	0.00342645	0.0211246	0.130243	0.334553	0.142989	102822	11.83	0.069	105354	-0.2	20592	2018	11	9	10	16	53	0.0793
2018-10-31 10:54:59	0	0	0	0	0	0.00457678	0.00552418	0.00741677	0.0178355	0.03924	0.0485212	0.0482971	0.0467001	0.0470569	0.0422336	0.0391454	0.0357136	0.0419694	0.0499213	0.0704937	0.0998304	0.135547	0.173866	0.168336	0.111187	0.0638564	0.0353458	0.0209252	0.0145947	0.0134909	0.0182298	0.0345733	0.080325	0.164649	0.172421	0.0487807	10252	11.75	0.069	105805	-0.2	20591	2018	11	9	10	16	54	0.0793
2018-10-31 10:54:59	0	0	0	0	0.00130329	0.00511058	0.00572781	0.0071192	0.0163068	0.035251	0.045672	0.0496496	0.0523533	0.0564871	0.0531409	0.0498429	0.0447206	0.04855	0.0510267	0.0587198	0.067613	0.0783102	0.0939462	0.102267	0.083572	0.0581836	0.0356857	0.0207491	0.0127893	0.0100854	0.0128139	0.0270528	0.0802386	0.218512	0.297915	0.0965872	102671	11.96	0.069	105279	-0.2	20591	2018	11	9	10	16	55	0.0793
2018-10-31 10:54:59	0	0	0	0	0	0.00291961	0.00389257	0.00614894	0.0157038	0.0399019	0.0663472	0.0862701	0.0996001	0.11008	0.0973853	0.0812672	0.0612239	0.0547792	0.0491984	0.0542186	0.0595443	0.0823573	0.14204	0.29467	0.518423	0.692066	0.601262	0.348876	0.162444	0.0723659	0.0356087	0.0204238	0.0141022	0.0109212	0.00838057	0.00405826	102143	11.82	0.069	105429	-0.19	20.59	2018	11	9	10	16	56	0.0793
2018-10-31 10:54:59	0	0	0	0	0.00128399	0.00511908	0.00575802	0.0072329	0.0167391	0.0365481	0.0476039	0.0533851	0.0573589	0.0619522	0.0556227	0.0479306	0.0396017	0.0415687	0.0441703	0.0559006	0.0709038	0.0902206	0.113941	0.116938	0.0853582	0.0541977	0.0320258	0.0187764	0.011699	0.00868351	0.00929159	0.015474	0.0403069	0.121698	0.214084	0.0781692	102369	11.74	0.069	105279	-0.21	20.59	2018	11	9	10	16	57	0.0793
2018-10-31 10:54:59	0	0	0	0	0	0.0035438	0.00532728	0.00838559	0.0208949	0.0465885	0.0560132	0.0537909	0.0525206	0.0561861	0.0552084	0.0555582	0.0512709	0.0563397	0.0574644	0.0687459	0.0822171	0.113474	0.178525	0.251627	0.235624	0.170844	0.107789	0.0680276	0.0461353	0.0371221	0.0385182	0.0545117	0.0910976	0.143904	0.135984	0.0461725	102445	11.94	0.069	10573	-0.2	20589	2018	11	9	10	16	58	0.0793
2018-10-31 10:54:59	0	0	0	0	0	0.00251539	0.00354135	0.00588599	0.015955	0.0402701	0.0591549	0.0627824	0.0621922	0.0613017	0.0507527	0.0428973	0.035947	0.0395105	0.0445699	0.0613506	0.084635	0.124738	0.193149	0.23848	0.183689	0.103303	0.0476358	0.0221082	0.0128958	0.011487	0.0178745	0.0421901	0.115146	0.247288	0.272569	0.0756276	102294	11.81	0.069	105805	-0.2	20589	2018	11	9	10	16	59	0.0793
2018-10-31 10:54:59	0	0	0	0	0	0.00279491	0.00372443	0.00546286	0.015525	0.0420506	0.0646725	0.0764262	0.084513	0.0949865	0.0876676	0.0782495	0.0638743	0.0641199	0.0612195	0.0700423	0.0801376	0.102386	0.141075	0.181059	0.176296	0.15274	0.117635	0.0840832	0.0598616	0.0474767	0.0480551	0.0637599	0.0988413	0.131746	0.0979199	0.0267258	101162	11.75	0.069	105504	-0.2	20588	2018	11	9	10	17	0	0.0793
2018-10-31 10:54:59	0	0	0	0	0	0.00343799	0.00425354	0.00600554	0.0152065	0.0362542	0.0508952	0.0580513	0.0626518	0.0684067	0.0637162	0.0591019	0.0518801	0.0549156	0.0551496	0.0630919	0.0721806	0.0904348	0.123632	0.152167	0.130247	0.089396	0.0553887	0.0358994	0.0268897	0.0249575	0.032555	0.0588636	0.127671	0.238717	0.233984	0.0629658	10154	11.93	0.069	105504	-0.2	20588	2018	11	9	10	17	1	0.0793
2018-10-31 10:54:59	0	0	0	0	0	0.00431296	0.00526495	0.00736274	0.0184701	0.0425027	0.0560838	0.0563457	0.0538953	0.0520035	0.0442746	0.0396499	0.0357812	0.0413541	0.0473363	0.0622215	0.0819271	0.111798	0.156683	0.184381	0.151142	0.107065	0.0720358	0.0497873	0.0369859	0.0316656	0.0356917	0.0551897	0.106118	0.18249	0.16699	0.0463724	101615	11.81	0.069	105504	-0.2	20588	2018	11	9	10	17	2	0.0794
2018-10-31 10:54:59	0	0	0	0	0	0.00439457	0.00494134	0.00630613	0.0156678	0.0366342	0.050564	0.0543769	0.0525872	0.0482883	0.036314	0.0277065	0.0215051	0.022473	0.0247286	0.0337943	0.0463187	0.0693868	0.110327	0.147368	0.131043	0.0931678	0.0570689	0.032841	0.0190562	0.0124065	0.0111884	0.0150987	0.0307717	0.0744936	0.127362	0.0584929	103199	11.75	0.069	105203	-0.2	20587	2018	11	9	10	17	3	0.0793
2018-10-31 10:54:59	0	0	0	0	0	0.00406417	0.00559786	0.00851888	0.0216416	0.0487211	0.0579343	0.0529213	0.0488498	0.0481313	0.0428856	0.0394828	0.0346996	0.0383721	0.0411953	0.0532484	0.0687421	0.0946203	0.13668	0.188997	0.215256	0.258901	0.337417	0.420514	0.397501	0.256456	0.132944	0.0690496	0.0403736	0.0265928	0.0177693	0.00827868	102218	11.93	0.069	105279	-0.2	20587	2018	11	9	10	17	4	0.0793
2018-10-31 10:54:59	0	0	0	0	0.00110078	0.00443292	0.00550033	0.0077454	0.0176256	0.0370631	0.0458457	0.0460864	0.0436654	0.0426295	0.037117	0.0332166	0.0299314	0.0337584	0.0380635	0.0511107	0.068845	0.0923633	0.121309	0.111531	0.0608305	0.0245448	0.0084978	0.00295601	0.00121174	0	0	0.00221098	0.0116129	0.076488	0.263531	0.155469	10418	11.81	0.069	105579	-0.2	20586	2018	11	9	10	17	5	0.0793
2018-10-31 10:54:59	0	0	0	0	0	0.00277758	0.00405541	0.00668931	0.0173786	0.0414999	0.0568989	0.0632005	0.0695917	0.0791069	0.0751897	0.0678625	0.055033	0.0542157	0.0511276	0.05913	0.0682995	0.0939382	0.150807	0.242383	0.29226	0.294144	0.245149	0.170846	0.105584	0.0644441	0.0472604	0.0439146	0.0514744	0.0643129	0.05983	0.02426	101238	11.75	0.069	105504	-0.2	20586	2018	11	9	10	17	6	0.0793
2018-10-31 10:54:59	0	0	0	0	0	0.00260714	0.00403095	0.00705319	0.0190626	0.0465592	0.061164	0.0607394	0.0568392	0.0532946	0.0417684	0.0339042	0.0279661	0.0326527	0.0415169	0.0683643	0.113007	0.18688	0.296894	0.315722	0.192357	0.0893479	0.0378214	0.0170528	0.00963277	0.00777568	0.0102219	0.0210441	0.0575196	0.14225	0.186766	0.058482	101313	11.93	0.069	105504	-0.21	20586	2018	11	9	10	17	7	0.0793
2018-10-31 10:54:59	0	0	0	0	0.00104166	0.00540281	0.00646295	0.00806521	0.0191238	0.0407119	0.0460774	0.0420081	0.0384055	0.0381375	0.0349946	0.034082	0.0317733	0.0382681	0.0461044	0.0704284	0.107738	0.183328	0.324569	0.410265	0.283845	0.13482	0.0528923	0.0211247	0.0101658	0.00699948	0.00798564	0.0155459	0.0415973	0.101823	0.119681	0.0347271	102671	11.79	0.069	105805	-0.2	20585	2018	11	9	10	17	8	0.0793
2018-10-31 10:54:59	0	0	0	0	0.00138804	0.00533909	0.00597004	0.00731874	0.0162376	0.0341463	0.0440938	0.048452	0.0503041	0.0525126	0.0471089	0.0421307	0.0369389	0.041001	0.0461681	0.0605748	0.0796587	0.106544	0.142626	0.151595	0.108465	0.064658	0.0364306	0.0217676	0.0150185	0.0126818	0.0146723	0.0226101	0.0424094	0.076346	0.083867	0.0260769	101917	11.75	0.069	105805	-0.2	20585	2018	11	9	10	17	9	0.0793
2018-10-31 10:54:59	0	0	0	0	0.00164258	0.0061114	0.00676741	0.00798502	0.0169389	0.0341753	0.0433451	0.0462358	0.0458947	0.0436732	0.0333892	0.0240577	0.0172885	0.0169175	0.0182087	0.0249985	0.0344593	0.046668	0.060301	0.051765	0.0258078	0.0095514	0.00324701	0.00129622	0	0	0.00129136	0.00447254	0.0240118	0.125521	0.321312	0.13309	101992	11.93	0.069	105354	-0.2	20585	2018	11	9	10	17	10	0.0793
2018-10-31 10:54:59	0	0	0	0	0	0.00386423	0.00479321	0.00684659	0.0171107	0.0396639	0.0520743	0.0550384	0.0551887	0.0554808	0.0467056	0.0379171	0.0285695	0.0267516	0.024787	0.0300055	0.0361827	0.0510129	0.078773	0.118465	0.148182	0.199298	0.308979	0.5183	0.754149	0.748698	0.500634	0.258129	0.134548	0.076028	0.0412416	0.0154752	101162	11.78	0.069	10573	-0.22	20585	2018	11	9	10	17	11	0.0793
2018-10-31 10:54:59	0	0	0	0	0	0.00459355	0.00566164	0.00742727	0.0181051	0.0410175	0.0534189	0.0555737	0.0548491	0.0555773	0.0486333	0.0430168	0.0370135	0.0395156	0.040408	0.0459233	0.0522043	0.062598	0.0803312	0.0981775	0.0949517	0.0873679	0.078696	0.0712137	0.063024	0.0554976	0.0529783	0.059282	0.0836657	0.129312	0.140809	0.0472276	102143	11.75	0.069	105354	-0.21	20585	2018	11	9	10	17	12	0.0793
2018-10-31 10:54:59	0	0	0	0	0	0.00261887	0.00363149	0.00587949	0.015731	0.0397587	0.0590803	0.0669148	0.0703721	0.0737028	0.0620165	0.0482326	0.0338755	0.0287813	0.023814	0.0243703	0.0246547	0.0268996	0.0321491	0.0405044	0.0487055	0.0675752	0.11217	0.225057	0.517849	116873	216569	337846	419417	270082	0.611	0.0917645	101389	11.92	0.069	105354	-0.2	20588	2018	11	9	10	17	13	0.0793
2018-10-31 10:54:59	0	0	0	0	0	0.00433325	0.00583738	0.00820654	0.0191884	0.0406362	0.0480478	0.0462296	0.0440077	0.0442931	0.0405178	0.0389562	0.0365235	0.0416772	0.0446087	0.0526384	0.0621775	0.0777508	0.1048	0.124239	0.0997814	0.0598704	0.0277248	0.0111627	0.00471737	0.00271545	0.00291324	0.0064019	0.0244728	0.105416	0.234107	0.0987379	102747	11.78	0.069	105504	-0.2	20589	2018	11	9	10	17	14	0.0793
2018-10-31 10:54:59	0	0	0	0	0	0.00288881	0.00432829	0.00720519	0.0198695	0.0488321	0.0602447	0.0564851	0.0518835	0.0526951	0.0489149	0.0462513	0.0397702	0.0421381	0.0430473	0.0562673	0.0735807	0.113331	0.201108	0.317276	0.318946	0.234638	0.137161	0.0728398	0.036972	0.0193317	0.0121696	0.00997885	0.0106139	0.0129405	0.0119106	0.00432161	102671	11.75	0.069	10573	-0.2	20589	2018	11	9	10	17	15	0.0794
2018-10-31 10:54:59	0	0	0	0	0	0	0.00196771	0.00487631	0.0165317	0.0491425	0.0700845	0.0684162	0.0648805	0.0673527	0.0630454	0.0603122	0.0513557	0.0525333	0.0497658	0.0598431	0.0719648	0.105057	0.182636	0.278241	0.262142	0.183867	0.109602	0.0639216	0.0401421	0.0302148	0.030046	0.0403306	0.0636797	0.0857111	0.0608327	0.0183269	102822	11.91	0.069	10573	-0.22	20589	2018	11	9	10	17	16	0.0793
2018-10-31 10:54:59	0	0	0	0	0	0.00416468	0.00546831	0.00783947	0.0181157	0.0386296	0.0485429	0.0489435	0.0462005	0.0425808	0.0331169	0.0264273	0.0211787	0.0228372	0.0263953	0.0396074	0.0596267	0.10039	0.17713	0.232657	0.176572	0.094663	0.0406139	0.0156885	0.00632613	0.00329331	0.00311852	0.00589925	0.020092	0.0793727	0.173117	0.0772091	102671	11.78	0.069	10573	-0.22	20589	2018	11	9	10	17	17	0.0793
2018-10-31 10:54:59	0	0	0	0	0	0.00284274	0.00386745	0.00605006	0.0149065	0.0347174	0.0498585	0.0555606	0.0575367	0.0573336	0.0471327	0.0396526	0.0337011	0.0391058	0.0490809	0.0757765	0.117193	0.190255	0.315822	0.408116	0.320618	0.177134	0.0839364	0.0458675	0.0327371	0.0285137	0.0303772	0.037451	0.0579561	0.0877954	0.111341	0.0428251	101615	11.75	0.069	10573	-0.21	20588	2018	11	9	10	17	18	0.0793
2018-10-31 10:54:59	0	0	0	0	0	0.00222367	0.00334229	0.00581024	0.0158877	0.0399258	0.0555457	0.0573365	0.0542174	0.0502335	0.0386451	0.0300967	0.0222937	0.0214889	0.0214163	0.0276512	0.0355588	0.0585724	0.122725	0.297322	0.56053	0.772575	0.653893	0.331497	0.112646	0.0320892	0.0100767	0.00412153	0.00237375	0.00177243	0.00138852	0	102897	11.9	0.069	105429	-0.22	20588	2018	11	9	10	17	19	0.0793
2018-10-31 10:54:59	0	0	0	0	0	0.00394769	0.00534878	0.00798295	0.0202614	0.0455812	0.0542585	0.0466934	0.0379852	0.0309112	0.0227206	0.0192676	0.0178817	0.0233059	0.0317982	0.0511787	0.0826303	0.134733	0.215894	0.255501	0.187043	0.108591	0.0568916	0.0309878	0.0199774	0.0171814	0.0218982	0.0418687	0.101193	0.203877	0.195841	0.0514706	10252	11.76	0.069	10573	-0.23	20588	2018	11	9	10	17	20	0.0793
2018-10-31 10:54:59	0	0	0	0	0	0.00177025	0.00311415	0.00640464	0.0185765	0.0478838	0.0631892	0.0603957	0.0539691	0.0495463	0.0410876	0.0372024	0.0343149	0.0407833	0.0475853	0.0635064	0.0849493	0.114109	0.159841	0.187113	0.146087	0.0897994	0.0472099	0.023644	0.0128441	0.00890565	0.00963429	0.0173409	0.0447388	0.119197	0.159091	0.0580928	102143	11.75	0.069	105279	-0.22	20587	2018	11	9	10	17	21	0.0793
2018-10-31 10:54:59	0	0	0	0	0	0.00361675	0.00463392	0.00688842	0.0170758	0.0393102	0.0523302	0.0549094	0.0543361	0.0540579	0.0461507	0.0392236	0.0318039	0.0323535	0.0328984	0.0427728	0.0556935	0.0867744	0.154175	0.230002	0.206737	0.127039	0.0611033	0.0281712	0.0142872	0.00905533	0.00867556	0.0134299	0.0325888	0.091318	0.174453	0.0894334	102218	11.9	0.069	105655	-0.22	20587	2018	11	9	10	17	22	0.0793
2018-10-31 10:54:59	0	0	0	0	0	0.00292102	0.00439282	0.00742319	0.0187058	0.0428522	0.0557224	0.0554225	0.0536125	0.0533997	0.045733	0.0392386	0.0322333	0.0340498	0.0366908	0.0501569	0.0686985	0.102824	0.16439	0.227217	0.215886	0.158722	0.0948957	0.051847	0.0293923	0.0193531	0.0174676	0.0227924	0.039348	0.0668061	0.0628619	0.0182341	102445	11.76	0.069	105354	-0.2	20586	2018	11	9	10	17	23	0.0793
2018-10-31 10:54:59	0	0	0	0	0	0.0038039	0.00481813	0.00700389	0.0169266	0.0384546	0.051799	0.0546811	0.0530387	0.0506128	0.0403259	0.0308688	0.0221104	0.0201815	0.0193693	0.0261706	0.0354457	0.0599737	0.115845	0.18385	0.177124	0.120665	0.0649775	0.0321893	0.0168268	0.0106903	0.0102075	0.0155451	0.0375012	0.105865	0.202017	0.0960411	102218	11.93	0.069	105655	-0.21	20585	2018	11	9	10	17	24	0.0793
2018-10-31 10:54:59	0	0	0	0	0.00124384	0.00505821	0.00558486	0.00715006	0.0172327	0.0389854	0.0527398	0.0557986	0.0542305	0.0490909	0.0349885	0.0229196	0.0137834	0.0110178	0.0094566	0.0124945	0.0164931	0.0336213	0.0930464	0.25704	0.436633	0.455754	0.279104	0.110699	0.0347146	0.0107881	0.00437819	0.00239486	0.00171918	0.00136248	0	0	101238	11.89	0.069	105655	-0.22	20585	2018	11	9	10	17	25	0.0793
2018-10-31 10:54:59	0	0	0	0	0	0.0036525	0.00517537	0.00832555	0.0215207	0.0501207	0.0640185	0.0608916	0.056153	0.0532851	0.0447983	0.0399262	0.034821	0.0388555	0.0429352	0.0568637	0.0752001	0.117821	0.217214	0.392483	0.493749	0.471731	0.350188	0.216955	0.120746	0.0647109	0.0388559	0.0281655	0.0255962	0.0234121	0.0154719	0.00477581	101841	11.76	0.069	105128	-0.22	20585	2018	11	9	10	17	26	0.0793
2018-10-31 10:54:59	0	0	0	0	0	0.00415332	0.00527738	0.00757345	0.017957	0.0396983	0.0517098	0.0528492	0.0500187	0.0467651	0.03847	0.0333792	0.0286658	0.030926	0.0333247	0.0450467	0.0609941	0.100267	0.188507	0.280433	0.225901	0.102781	0.029335	0.00710537	0.00207243	0.00100975	0.00112433	0.00298062	0.0151558	0.0818526	0.21052	0.102816	102445	11.88	0.069	105655	-0.2	20585	2018	11	9	10	17	27	0.0793
2018-10-31 10:54:59	0	0	0	0	0	0.00422888	0.00579033	0.00852828	0.0209916	0.0464307	0.0557541	0.0524429	0.0491839	0.0500208	0.0474726	0.0487788	0.0489967	0.0598085	0.0686829	0.0854618	0.106401	0.131449	0.165914	0.191715	0.172119	0.140154	0.103924	0.0712437	0.0475696	0.0357907	0.0357259	0.0507535	0.0900095	0.151521	0.139127	0.0406462	101162	11.88	0.069	105053	-0.2	20585	2018	11	9	10	17	28	0.0793
2018-10-31 10:54:59	0	0	0	0	0	0.00271515	0.00392464	0.00689916	0.0194527	0.0490447	0.0632894	0.0587215	0.0510595	0.0457491	0.0378151	0.0343964	0.0315379	0.0364792	0.0411508	0.0541005	0.0712141	0.100153	0.153531	0.213306	0.20751	0.164932	0.114413	0.0763079	0.0513663	0.0383171	0.0359859	0.0444797	0.0686598	0.0986859	0.0810274	0.0224291	102445	11.76	0.069	105579	-0.22	20585	2018	11	9	10	17	29	0.0793
2018-10-31 10:54:59	0	0	0	0	0	0.00409307	0.00496308	0.00665221	0.0162666	0.0369937	0.0486961	0.0527674	0.0548517	0.0587943	0.0545799	0.0507742	0.0443818	0.0481073	0.0509239	0.0637524	0.0797924	0.112861	0.175443	0.252684	0.26145	0.225127	0.166368	0.110566	0.0709431	0.0472953	0.0388178	0.0403301	0.0530763	0.0741264	0.0752196	0.0320081	101766	11.94	0.069	105354	-0.23	20584	2018	11	9	10	17	30	0.0793
2018-10-31 10:54:59	0	0	0	0	0	0.0036146	0.00461973	0.00678673	0.0168373	0.0391616	0.053444	0.0563888	0.0533779	0.0481481	0.0364087	0.0289798	0.0242651	0.0281957	0.0356029	0.0553943	0.0864914	0.139272	0.225877	0.267653	0.184177	0.0866189	0.030459	0.00971823	0.00360308	0.00200209	0.00220073	0.00485177	0.018679	0.0744106	0.155176	0.0686867	101615	11.88	0.069	105354	-0.21	20585	2018	11	9	10	17	31	0.0793
2018-10-31 10:54:59	0	0	0	0	0	0.00371582	0.00512024	0.00800261	0.0198927	0.0450805	0.0579103	0.0567753	0.0529343	0.0492524	0.0393132	0.0322901	0.0271413	0.0302026	0.0344354	0.0462821	0.0623985	0.0847618	0.117395	0.126798	0.0879985	0.0481178	0.0233017	0.011808	0.00709865	0.00575409	0.00753929	0.0164167	0.0548936	0.181595	0.280827	0.0816971	101841	11.76	0.069	104978	-0.22	20584	2018	11	9	10	17	32	0.0793
2018-10-31 10:54:59	0	0	0	0	0.00224352	0.0102292	0.010046	0.0097366	0.0212392	0.0433456	0.0513716	0.0586399	0.075132	0.114188	0.151643	0.179591	0.170825	0.176166	0.153514	0.149894	0.145879	0.164222	0.206475	0.254173	0.244276	0.213613	0.177002	0.148815	0.131145	0.123242	0.121216	0.118217	0.101058	0.0678491	0.0300541	0.00806825	100936	11.94	0.069	105354	-0.22	20584	2018	11	9	10	17	33	0.0793
2018-10-31 10:54:59	0	0	0	0	0.00158942	0.00524432	0.00625491	0.00831909	0.0173816	0.0347211	0.0460407	0.0497588	0.0497473	0.0475572	0.0392054	0.0332634	0.0286148	0.0315482	0.0366999	0.0510523	0.0712106	0.107313	0.167061	0.200317	0.146393	0.0743044	0.0296195	0.0113428	0.00508053	0.00318997	0.00346755	0.0067636	0.0220329	0.0832026	0.188573	0.0956741	101841	11.88	0.069	104978	-0.21	20584	2018	11	9	10	17	34	0.0793
2018-10-31 10:54:59	0	0	0	0	0.00102943	0.00487285	0.0058245	0.00743877	0.0176431	0.0386053	0.0481162	0.0483719	0.0468494	0.0466955	0.0416795	0.0384388	0.0339207	0.0370285	0.039488	0.0512034	0.0665207	0.0957956	0.14521	0.175096	0.131876	0.0724115	0.0316806	0.0131416	0.00633148	0.00430854	0.00520769	0.0120471	0.0453354	0.165172	0.261236	0.0790434	103426	11.77	0.069	105579	-0.2	20584	2018	11	9	10	17	35	0.0793
2018-10-31 10:54:59	0	0	0	0	0.00105024	0.00437518	0.00528257	0.00722118	0.0169898	0.0370556	0.0471605	0.0481141	0.0452409	0.0409963	0.031992	0.0265655	0.0232816	0.0277137	0.0352609	0.0525393	0.078571	0.112167	0.152295	0.154849	0.102673	0.0551748	0.0263333	0.0125494	0.00681945	0.00500089	0.00626492	0.0138604	0.0496629	0.187731	0.375986	0.156122	10169	11.95	0.069	105504	-0.22	20584	2018	11	9	10	17	36	0.0793
2018-10-31 10:54:59	0	0	0	0	0	0.00336393	0.00472553	0.00733276	0.0180339	0.0407385	0.0531552	0.0559674	0.0575716	0.0612986	0.0565425	0.0519734	0.0460267	0.0512009	0.0563308	0.070688	0.0888631	0.110818	0.13963	0.141346	0.0959814	0.0526011	0.0263125	0.0139434	0.00901603	0.00805897	0.0114232	0.0256171	0.0773433	0.216552	0.291468	0.0877493	101917	11.88	0.069	105579	-0.23	20584	2018	11	9	10	17	37	0.0794
2018-10-31 10:54:59	0	0	0	0	0.00102595	0.00434504	0.00570719	0.00797377	0.0177135	0.0365306	0.0460787	0.0472529	0.0468701	0.0470718	0.0410977	0.0361466	0.030741	0.0324588	0.0342231	0.0419694	0.0515255	0.068834	0.0990283	0.129617	0.123228	0.0977924	0.0693874	0.0486512	0.0359601	0.0296277	0.0309726	0.0414791	0.0715697	0.129763	0.174632	0.0707978	102143	11.76	0.069	105504	-0.22	20584	2018	11	9	10	17	38	0.0793
2018-10-31 10:54:59	0	0	0	0	0	0.00365188	0.00483614	0.00723078	0.0192969	0.0460929	0.0551729	0.051665	0.0463753	0.0449037	0.040776	0.0395827	0.037286	0.0424887	0.0448441	0.0541042	0.0653687	0.0844354	0.119955	0.141266	0.101636	0.0515734	0.0201157	0.00723677	0.00296473	0.00183023	0.002327	0.00618788	0.0280435	0.119281	0.210867	0.0619958	102822	11.94	0.069	105053	-0.22	20584	2018	11	9	10	17	39	0.0793
2018-10-31 10:54:59	0	0	0	0	0	0.00338357	0.00533141	0.0089833	0.0218378	0.0473668	0.0539876	0.0477962	0.0402352	0.0353176	0.0279989	0.0242713	0.021835	0.0256362	0.030395	0.0420496	0.0583683	0.0821637	0.120696	0.137627	0.0963361	0.0491372	0.0206097	0.00860592	0.00430778	0.00319861	0.00433204	0.0109058	0.0410979	0.142788	0.206388	0.0554893	102671	11.86	0.069	104978	-0.22	20584	2018	11	9	10	17	40	0.0793
2018-10-31 10:54:59	0	0	0	0	0.00144873	0.00529564	0.00562574	0.00708879	0.0165673	0.0366792	0.0487973	0.0503009	0.0455384	0.0395534	0.0318902	0.0292554	0.0300025	0.0380226	0.0466247	0.0557313	0.0667452	0.0679402	0.0616753	0.0394345	0.0165911	0.00585183	0.0020152	0	0	0	0	0.0028269	0.0169044	0.106274	0.301653	0.136178	102143	11.76	0.069	105203	-0.22	20584	2018	11	9	10	17	41	0.0793
2018-10-31 10:54:59	0	0	0	0	0	0.00354916	0.00457595	0.0066978	0.0169548	0.0399443	0.0530809	0.0560798	0.055548	0.0547169	0.0456054	0.0388238	0.0321596	0.0350536	0.039328	0.0555939	0.0785901	0.130323	0.244331	0.407836	0.44095	0.340166	0.190736	0.0857959	0.0357388	0.0163288	0.0102556	0.00971041	0.013854	0.023792	0.0310734	0.0170349	101841	11.83	0.0619	105805	-0.17	20576	2018	11	9	10	14	52	0.0768
2018-10-31 10:54:59	0	0	0	0	0.00103419	0.0043129	0.00583362	0.00834463	0.0180899	0.0360654	0.0430407	0.0420486	0.0393078	0.0372069	0.0318714	0.0300429	0.0299508	0.0389389	0.0521192	0.0743373	0.10635	0.138728	0.170895	0.152921	0.0853906	0.0356567	0.0127089	0.00463043	0.00213267	0.00151787	0.00206916	0.00559138	0.0248184	0.113867	0.24962	0.105652	102596	11.93	0.0687	105655	-0.17	20574	2018	11	9	10	14	53	0.0791
2018-10-31 10:54:59	0	0	0	0	0	0.00273811	0.0040481	0.00665539	0.0178484	0.0437009	0.0574247	0.0586567	0.0561367	0.0548561	0.0470668	0.0422909	0.0373029	0.0416184	0.0455238	0.0602205	0.0798635	0.110299	0.153983	0.164091	0.109593	0.0561812	0.0240459	0.00974743	0.00447809	0.00287017	0.00337317	0.00758142	0.0294974	0.125922	0.287419	0.133953	103199	11.83	0.0689	106106	-0.18	20573	2018	11	9	10	14	54	0.0792
2018-10-31 10:54:59	0	0	0	0	0.00107646	0.00444278	0.00540951	0.00718981	0.0167519	0.0373993	0.0523795	0.0592515	0.0627663	0.0644764	0.0531522	0.0415363	0.0314638	0.030708	0.0310553	0.0377957	0.0460845	0.0574298	0.0728392	0.076992	0.0577004	0.0370915	0.0225788	0.0142818	0.0101051	0.00885554	0.0117207	0.024326	0.0723776	0.226954	0.4155	0.178581	101992	11.75	0.0689	106181	-0.18	20573	2018	11	9	10	14	55	0.0792
2018-10-31 10:54:59	0	0	0	0	0	0.00380919	0.00461204	0.00668841	0.0162682	0.0368491	0.0488066	0.0504997	0.0479816	0.045342	0.0383458	0.0350637	0.033681	0.0422022	0.0544192	0.0803427	0.119003	0.16537	0.213799	0.187676	0.0979854	0.0392137	0.0145091	0.00605253	0.00338749	0.00299038	0.00483562	0.0135642	0.0518392	0.168655	0.245053	0.0836967	103199	11.9	0.0689	10573	-0.18	20573	2018	11	9	10	14	56	0.0793
2018-10-31 10:54:59	0	0	0	0	0	0.00351351	0.00488227	0.00732031	0.0179187	0.0408712	0.0549375	0.0593488	0.0597239	0.0587995	0.0483375	0.0404092	0.0332167	0.0359048	0.0400834	0.0544246	0.074032	0.111598	0.181132	0.252351	0.231887	0.155203	0.0775659	0.0331309	0.0147634	0.00852354	0.00811369	0.0132442	0.033712	0.0946083	0.163349	0.0708373	103048	11.83	0.0689	105955	-0.18	20575	2018	11	9	10	14	57	0.0793
2018-10-31 10:54:59	0	0	0	0	0	0.00334881	0.00445439	0.00684397	0.0173313	0.0409626	0.055944	0.0590055	0.0551403	0.048332	0.0355551	0.0289623	0.0260187	0.0330827	0.0455017	0.0722859	0.115159	0.182436	0.286099	0.340885	0.250889	0.138469	0.0643216	0.0296295	0.0159054	0.0112056	0.0118898	0.0177249	0.0329313	0.0557165	0.0608665	0.0219111	10252	11.75	0.0689	106256	-0.19	20576	2018	11	9	10	14	58	0.0793
2018-10-31 10:54:59	0	0	0	0	0	0.0032631	0.00473382	0.00739969	0.0188294	0.0428058	0.0524015	0.0492291	0.0449795	0.0431652	0.0381086	0.0369413	0.0352632	0.0423957	0.0495353	0.0667074	0.0896178	0.12956	0.201028	0.290653	0.317063	0.321063	0.324156	0.341427	0.368129	0.377672	0.360817	0.302119	0.223401	0.143893	0.0752793	0.0235185	103199	11.94	0.0689	105805	-0.19	20576	2018	11	9	10	14	59	0.0793
2018-10-31 10:54:59	0	0	0	0	0.00121522	0.00429337	0.00532473	0.00773185	0.0171374	0.0355652	0.0463323	0.0483977	0.0488867	0.0509947	0.0494733	0.050295	0.0497511	0.0568523	0.0614785	0.0715095	0.0831506	0.102796	0.136901	0.176584	0.176219	0.14513	0.0950925	0.0528004	0.0291807	0.0190674	0.0182773	0.0253189	0.0480068	0.0957265	0.123369	0.0507194	10335	11.83	0.069	105655	-0.2	20576	2018	11	9	10	15	0	0.0793
2018-10-31 10:54:59	0	0	0	0	0	0.00315033	0.00409052	0.00629466	0.016091	0.0387234	0.0571624	0.0646303	0.0685103	0.070617	0.0605387	0.0518359	0.0441305	0.0492278	0.0568531	0.0796147	0.111792	0.157931	0.216005	0.214113	0.134746	0.0701674	0.0361568	0.0213513	0.0158141	0.0159017	0.0234881	0.0480606	0.115426	0.2355	0.275143	0.105954	102369	11.76	0.069	106256	-0.18	20575	2018	11	9	10	15	1	0.0793
2018-10-31 10:54:59	0	0	0	0	0	0.00407291	0.00500102	0.00679809	0.016587	0.0373971	0.0471235	0.0472578	0.0448845	0.0430422	0.0355142	0.0313515	0.0280318	0.0332505	0.0403298	0.058087	0.0836382	0.129749	0.214013	0.320724	0.349925	0.325681	0.261552	0.186644	0.117764	0.0671704	0.0388495	0.0243737	0.0177806	0.0131991	0.00837538	0.00299679	103727	11.95	0.069	10588	-0.18	20574	2018	11	9	10	15	2	0.0793
2018-10-31 10:54:59	0	0	0	0	0	0.00245644	0.00371334	0.00637805	0.0171329	0.041662	0.0538479	0.0521743	0.0477482	0.0450495	0.0380781	0.0359201	0.0353316	0.0463866	0.0618713	0.0917348	0.136158	0.196094	0.280177	0.331437	0.276095	0.206762	0.149685	0.107972	0.0786911	0.0597273	0.0514011	0.0481231	0.047867	0.0500253	0.0483477	0.0199682	102747	11.83	0.069	10588	-0.18	20574	2018	11	9	10	15	3	0.0793
2018-10-31 10:54:59	0	0	0	0	0.00103576	0.00418164	0.00524194	0.00733368	0.0169505	0.0368296	0.0487432	0.0513369	0.0494028	0.0451723	0.03407	0.0262619	0.020433	0.0215709	0.0245083	0.0369872	0.0559084	0.105094	0.224099	0.365111	0.324901	0.19096	0.0894605	0.0402852	0.0203547	0.0131904	0.0127132	0.0181439	0.0344592	0.0682846	0.0906417	0.0428716	103199	11.75	0.069	106331	-0.19	20574	2018	11	9	10	15	4	0.0793
2018-10-31 10:54:59	0	0	0	0	0	0.00276317	0.00379081	0.00586236	0.0154277	0.0376561	0.0516686	0.0546256	0.0534912	0.0512306	0.040409	0.0329462	0.0269696	0.0300111	0.0347817	0.0492225	0.0695785	0.107772	0.178327	0.262699	0.27694	0.261325	0.243643	0.23755	0.247947	0.27979	0.357351	0.459251	0.497116	0.351349	0.13395	0.0246163	10335	11.96	0.069	10588	-0.18	20574	2018	11	9	10	15	5	0.0793
2018-10-31 10:54:59	0	0	0	0	0.00170947	0.00785053	0.00794252	0.0086626	0.02072	0.0449201	0.0502235	0.0448873	0.0402197	0.0387512	0.0359888	0.0397031	0.0460925	0.0681394	0.0948587	0.131897	0.183403	0.245372	0.332638	0.398877	0.340677	0.237316	0.135884	0.0675192	0.0312738	0.0147145	0.00732089	0.00398113	0.00217819	0.00107003	0	0	102596	11.83	0.069	106031	-0.2	20574	2018	11	9	10	15	6	0.0793
2018-10-31 10:54:59	0	0	0	0	0	0.00318473	0.00381358	0.00538649	0.0130094	0.0302216	0.0437843	0.0520237	0.0571726	0.0628448	0.0584092	0.0528611	0.0441588	0.0446524	0.0446757	0.0561242	0.0703627	0.110451	0.205511	0.365993	0.441361	0.394234	0.280012	0.169885	0.0946352	0.0507207	0.0310219	0.0232933	0.0219848	0.0238724	0.0208238	0.0090845	104029	11.76	0.069	105805	-0.19	20573	2018	11	9	10	15	7	0.0793
2018-10-31 10:54:59	0	0	0	0	0	0.00257153	0.00408077	0.0072158	0.0180297	0.0415864	0.0573345	0.0613597	0.063476	0.0676587	0.0625606	0.0581655	0.0516499	0.0577948	0.0646726	0.085	0.11179	0.155359	0.225888	0.280971	0.246314	0.183159	0.127536	0.0919064	0.073018	0.06592	0.0715436	0.0896373	0.126057	0.168933	0.167584	0.058669	102973	11.95	0.069	106256	-0.18	20573	2018	11	9	10	15	8	0.0793
2018-10-31 10:54:59	0	0	0	0	0.00117927	0.0046018	0.00552639	0.00712011	0.0155091	0.0319975	0.0415047	0.0446266	0.0449189	0.0442274	0.037313	0.0329249	0.0300849	0.0363219	0.0460498	0.0652579	0.0927273	0.124586	0.158507	0.158126	0.110213	0.0664648	0.0384006	0.0235303	0.0167231	0.01479	0.0183925	0.0314879	0.0702108	0.158416	0.239121	0.122157	102897	11.83	0.069	106256	-0.19	20573	2018	11	9	10	15	9	0.0793
[truncated: 2,922 more rows]
[truncated: 12 more columns]

## Sheet: PSD Phillips
	Particle size (µm)
[truncated: 481 more rows]
[truncated: 12 more columns]
