# Supplementary material for: Technical note: A time-integrated sediment trap to sample diatoms for hydrological tracing
Source: Copernicus journal article supplement (doi:10.5194/hess-2020-166), 2020-04-27
Supplement: Supplementary file [file hess-2020-166-AC2-supplement.pdf]

## **Author response to RC1 on “Technical note: A time-integrated sediment trap to sample diatoms for hydrological tracing” by Jasper Foets et al.**

### **Jasper Foets on behalf of all co-authors**

We are grateful to the referee for the constructive and valuable comments. Below we reply on the suggestions/comments.

We agree with all his/her comments and will put more emphasis on the results in the abstract, add in the appendix a full species list and specify Figure 7 in the appendix.

Specific future changes:

- Add “relative abundances” to Table 2 and Figure 7
- Add sentences in the discussion referring to the differences between diatoms and suspended sediment particles
- Refer to the different behaviour of diatoms compared to suspended sediment in the statistics section linking it better with the use of ecological guilds.
- Modify the abstract substantially, focusing more on the results and less on the introduction.
- JFI refers to Jean-François Iffly, one of the co-authors.
